# Supplementary material for: On the power of epigenome-wide association studies using a disease-discordant twin design
Source: Oxford University Press journal article supplement (doi:10.1093/bioinformatics/bty532), 2018-06-27
Supplement: bioinformatics_34_23_4073_s1.zip [file bioinformatics_34_23_4073_s1.zip]

$P_K = 0$ ,  $E(M) = -3.78$ ,  $Var(M) = 0.06$

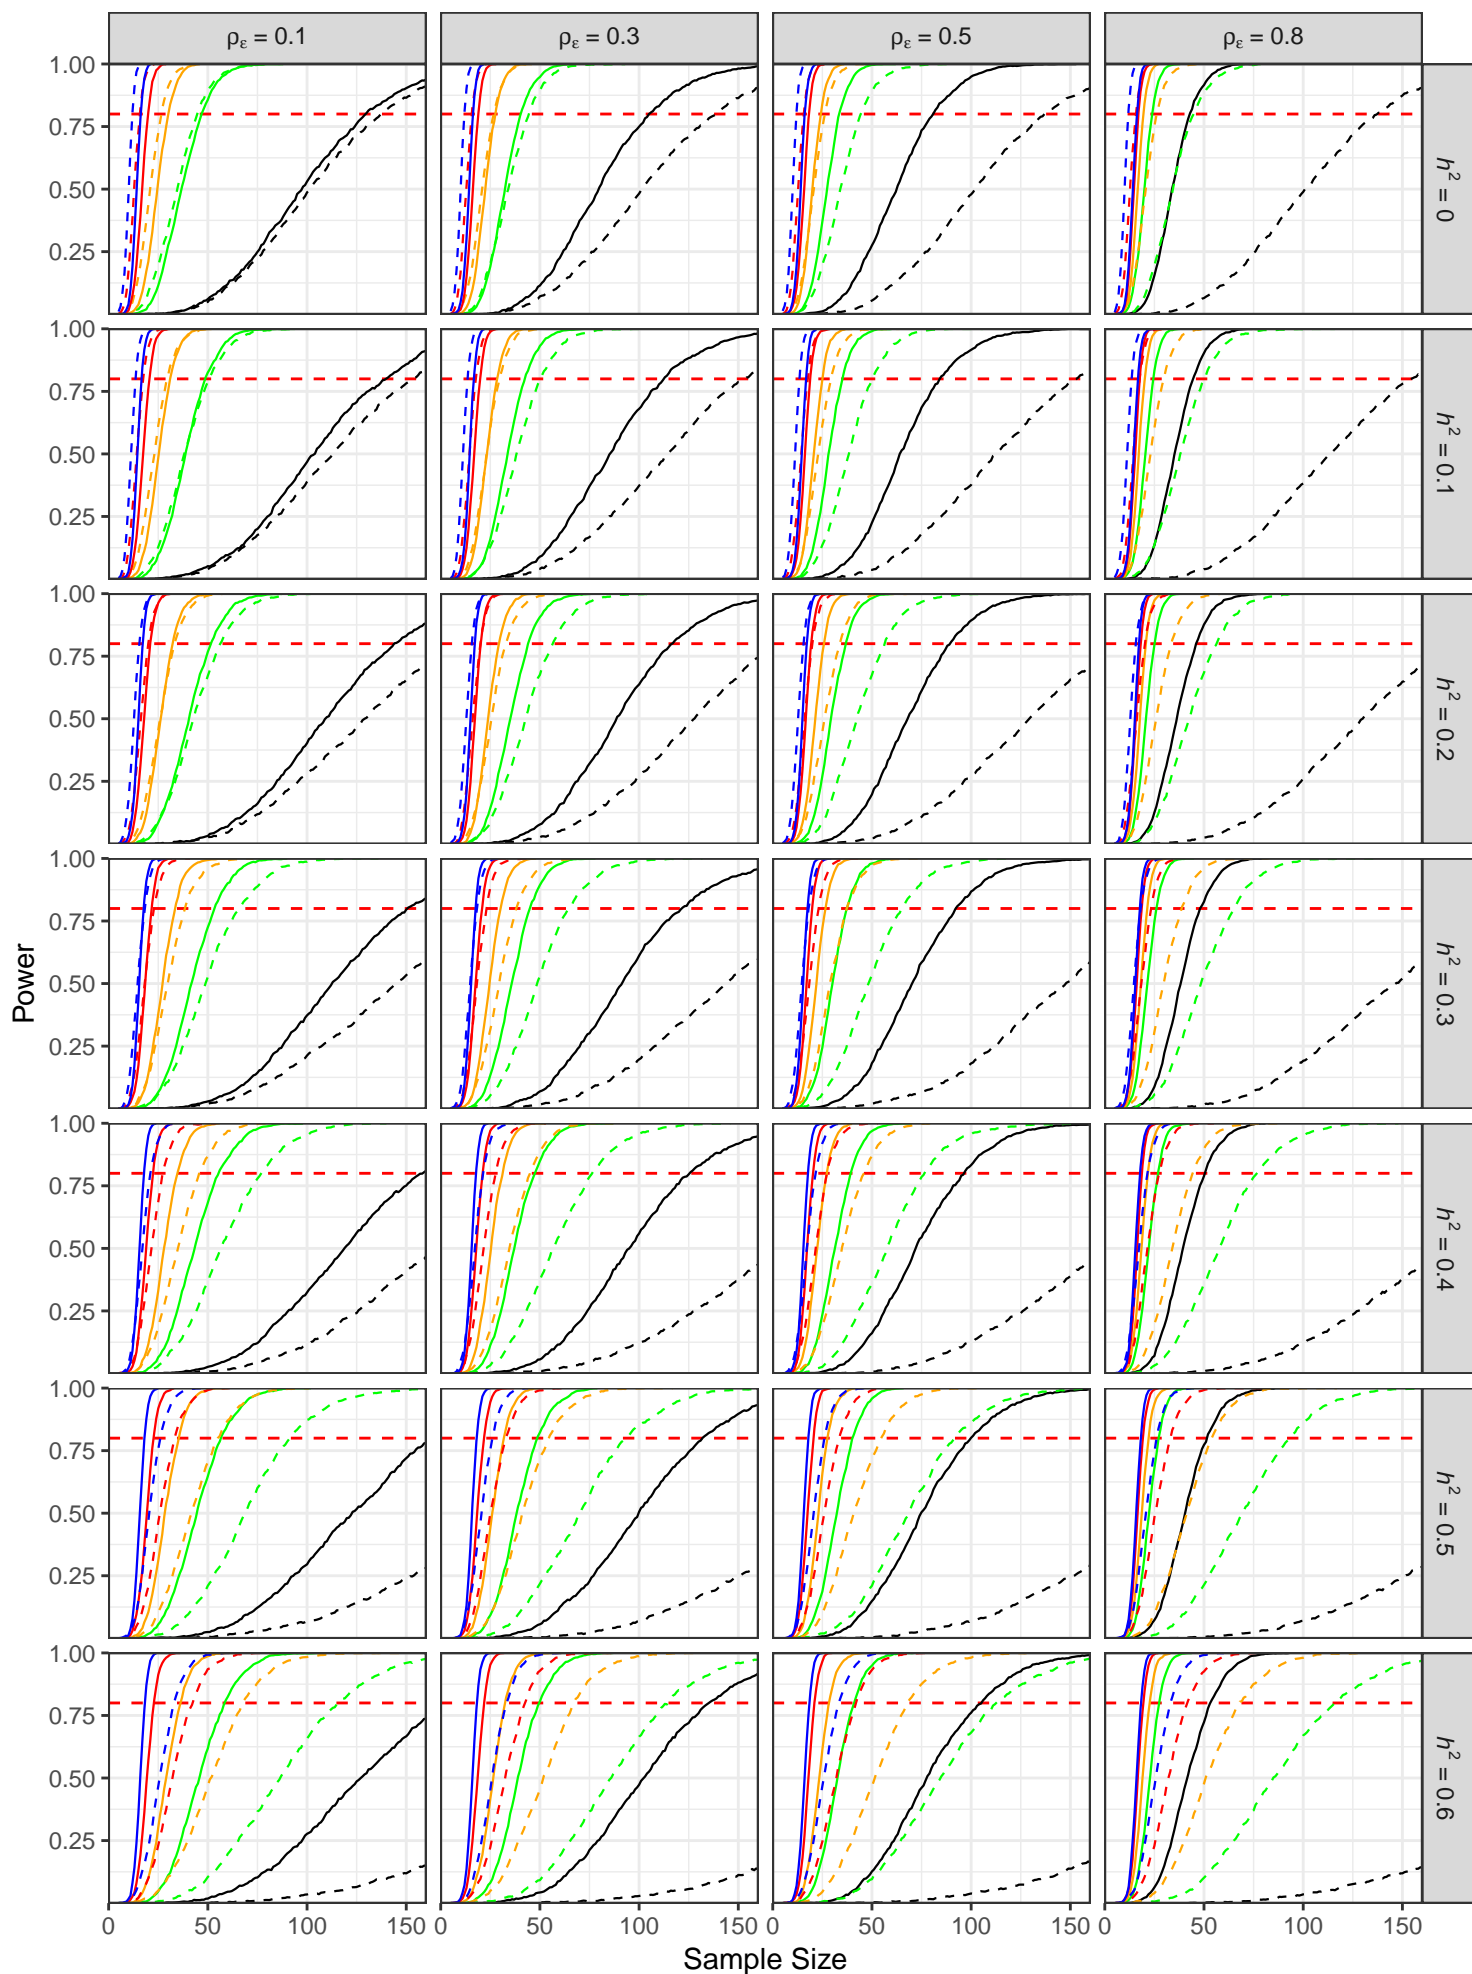

$R^2_{M,E}$  — 0.1 — 0.3 — 0.5 — 0.8 — 1

Design - - Ordinary Case-control — Discordant Twin

$$P_K = 0, E(M) = -3.78, \text{Var}(M) = 1$$

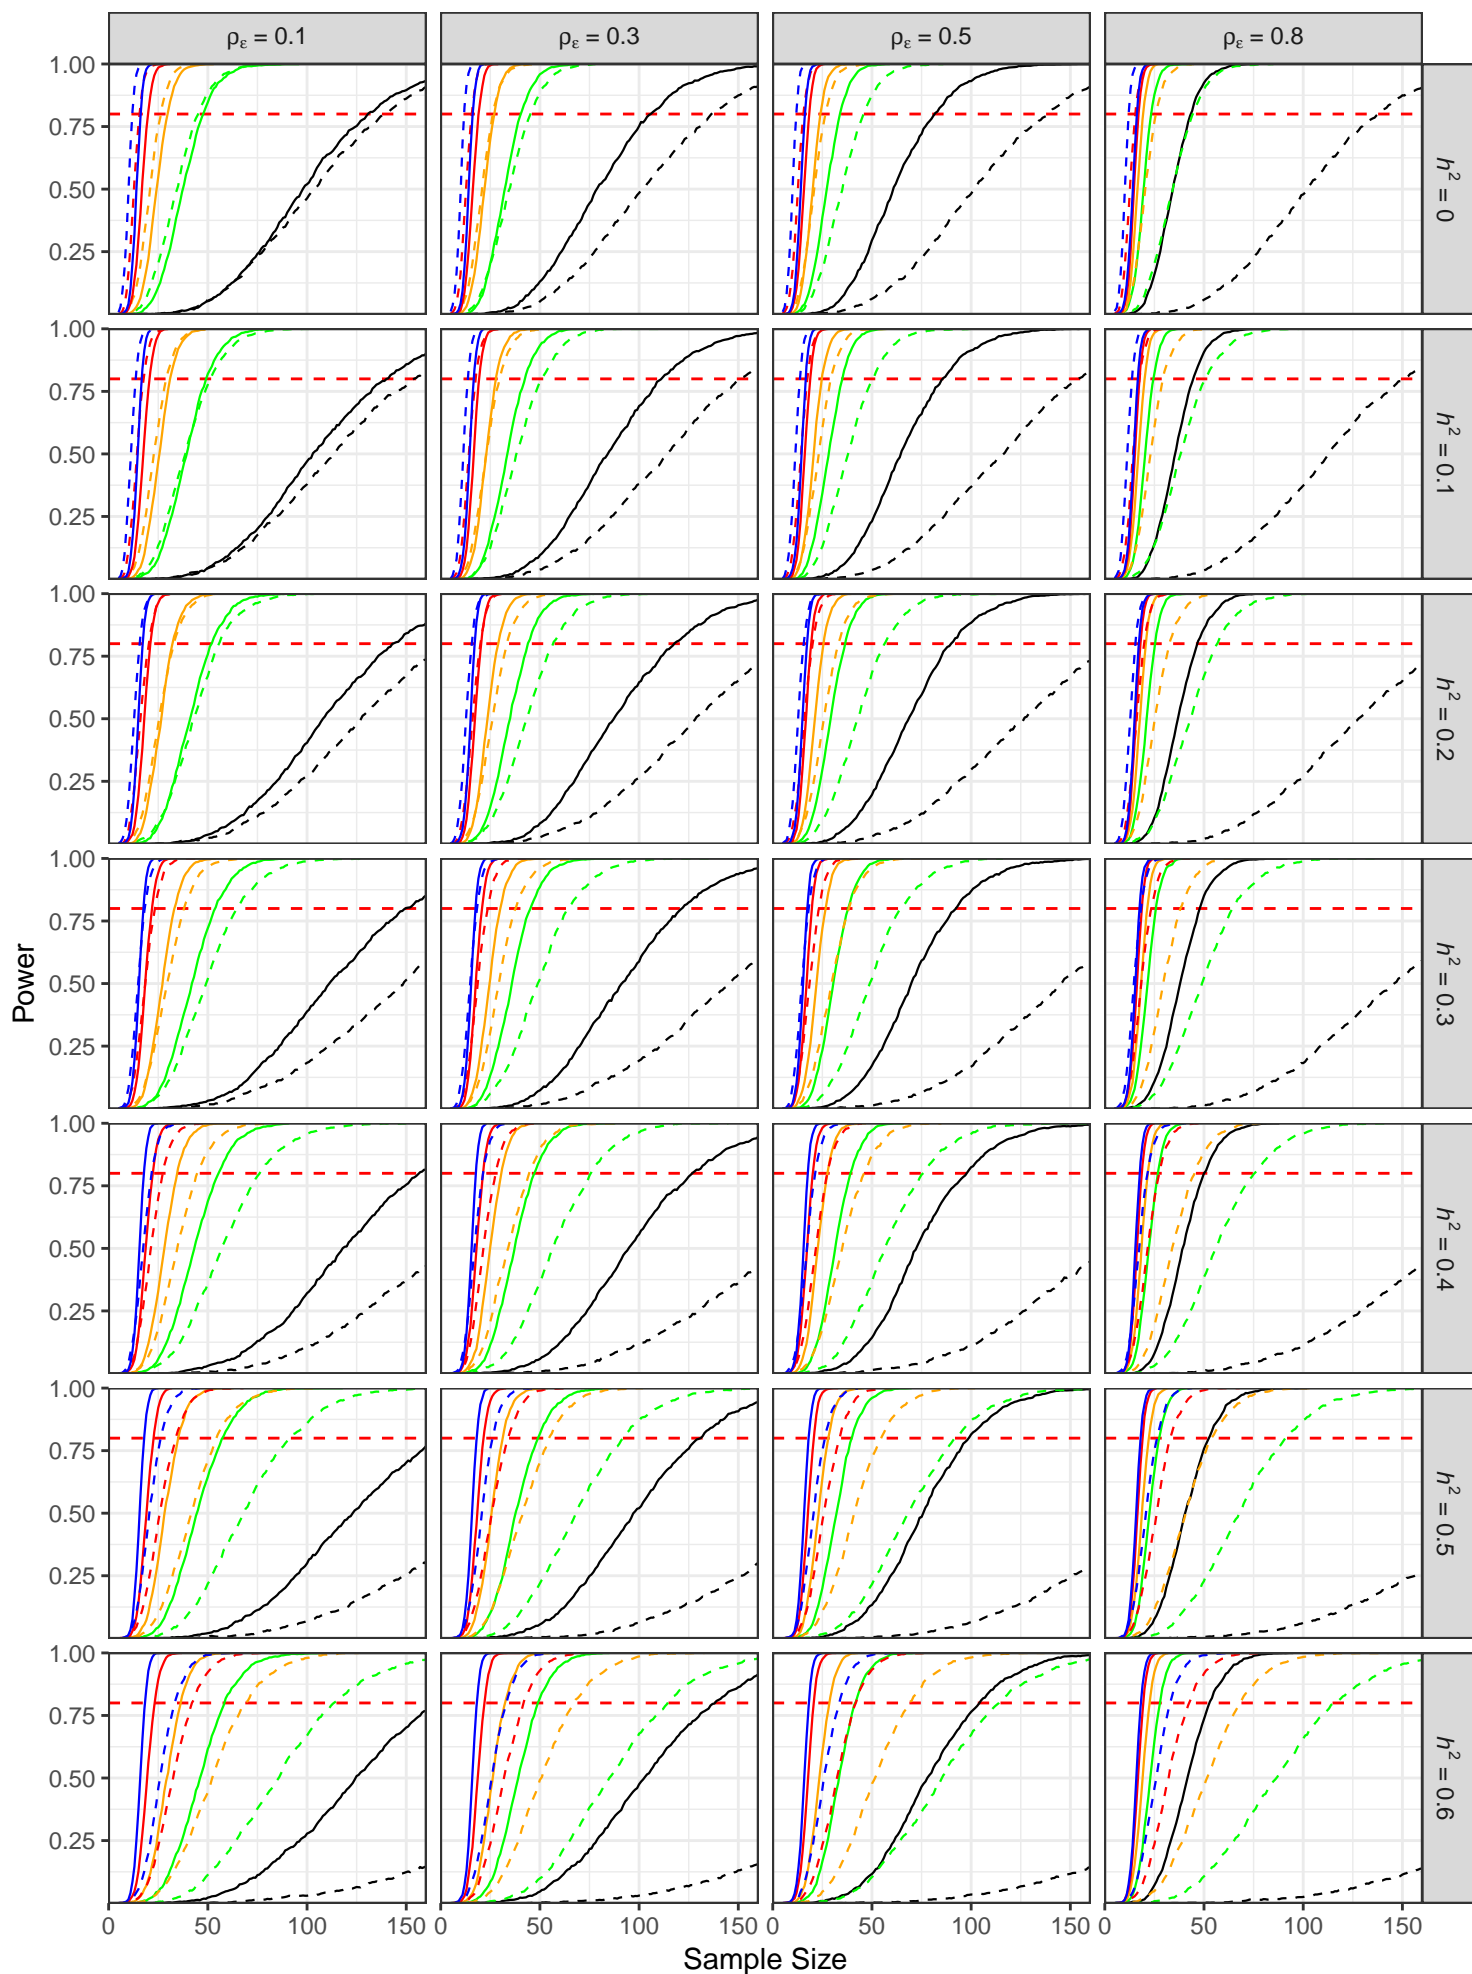

$R^2_{M,E}$  — 0.1 — 0.3 — 0.5 — 0.8 — 1

Design - - Ordinary Case-control — Discordant Twin

$$P_K = 0, E(M) = -3.78, \text{Var}(M) = 2$$

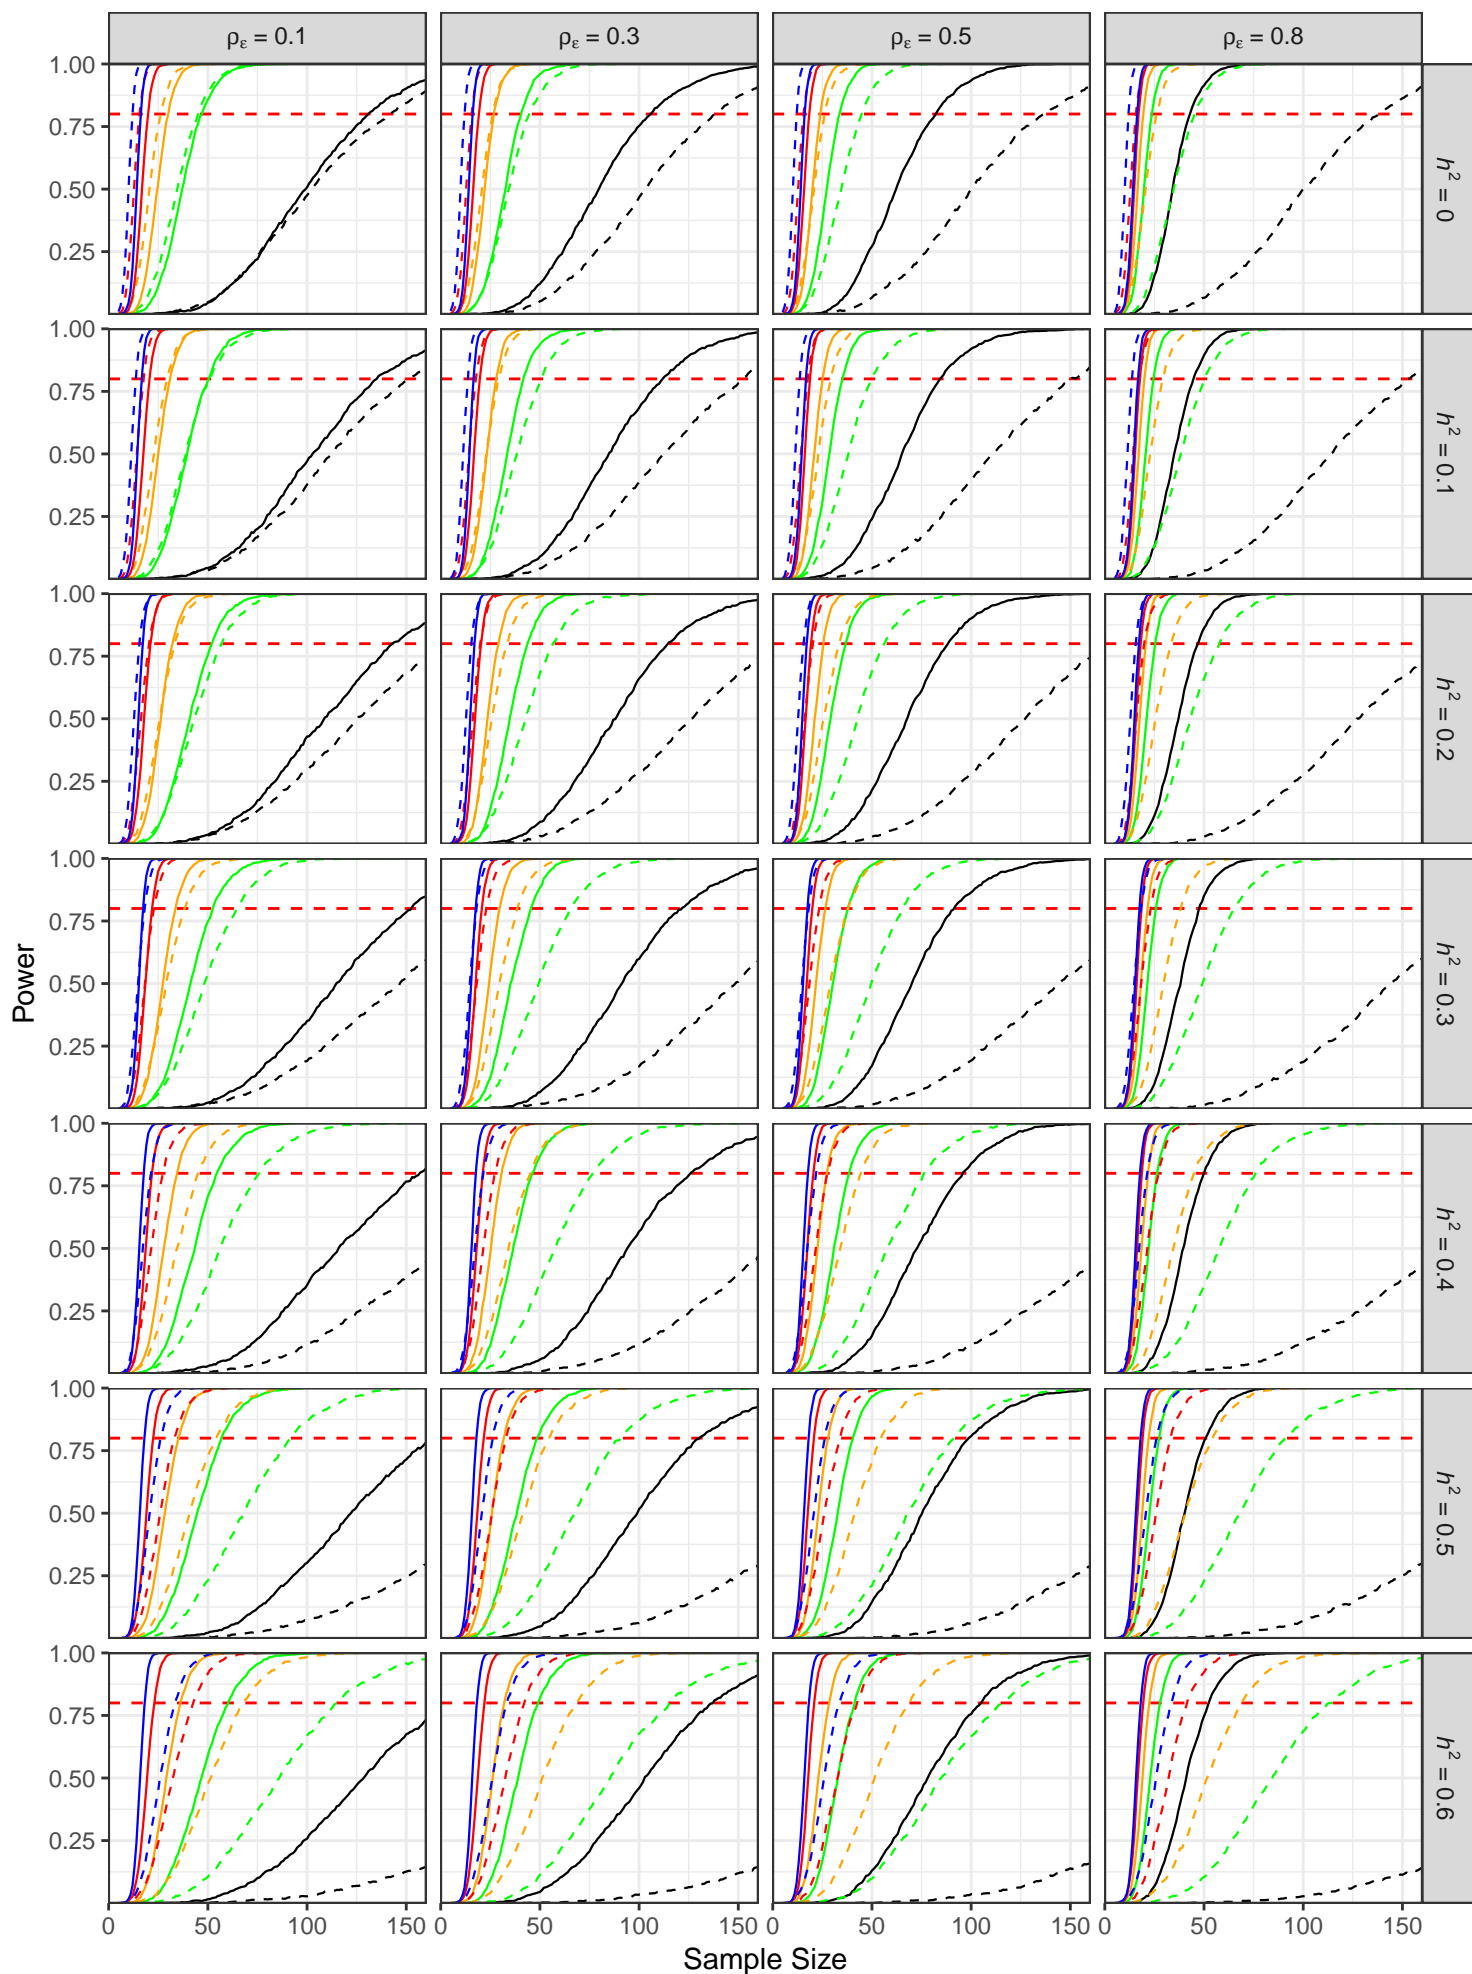

$$P_K = 0, E(M) = -3.78, \text{Var}(M) = 3$$

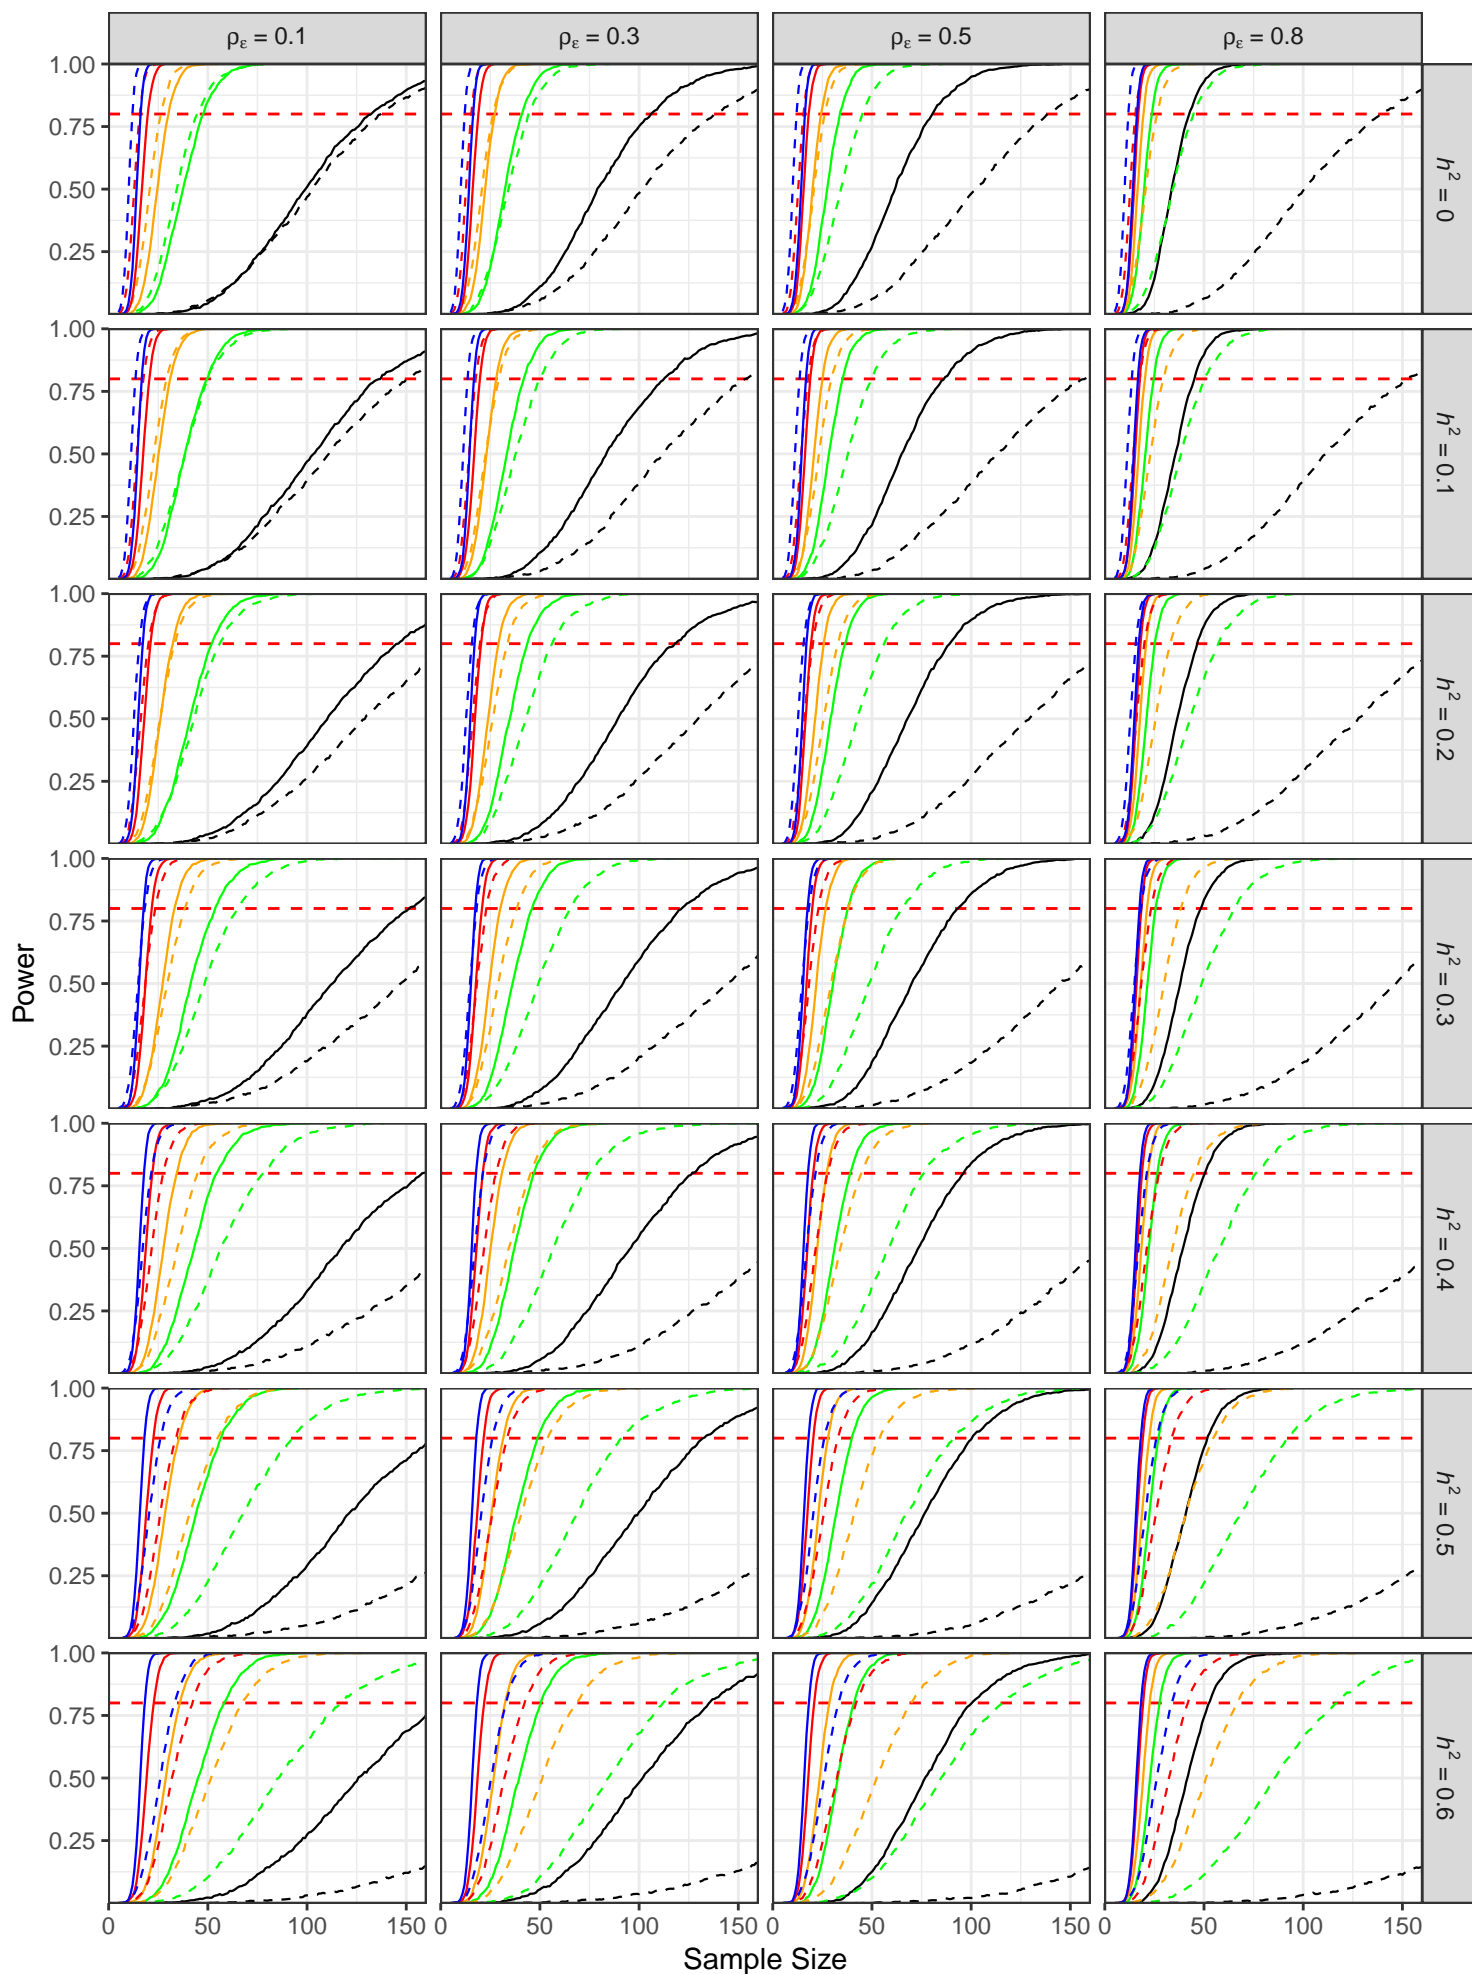

$$P_K = 0, E(M) = -3.78, \text{Var}(M) = 4$$

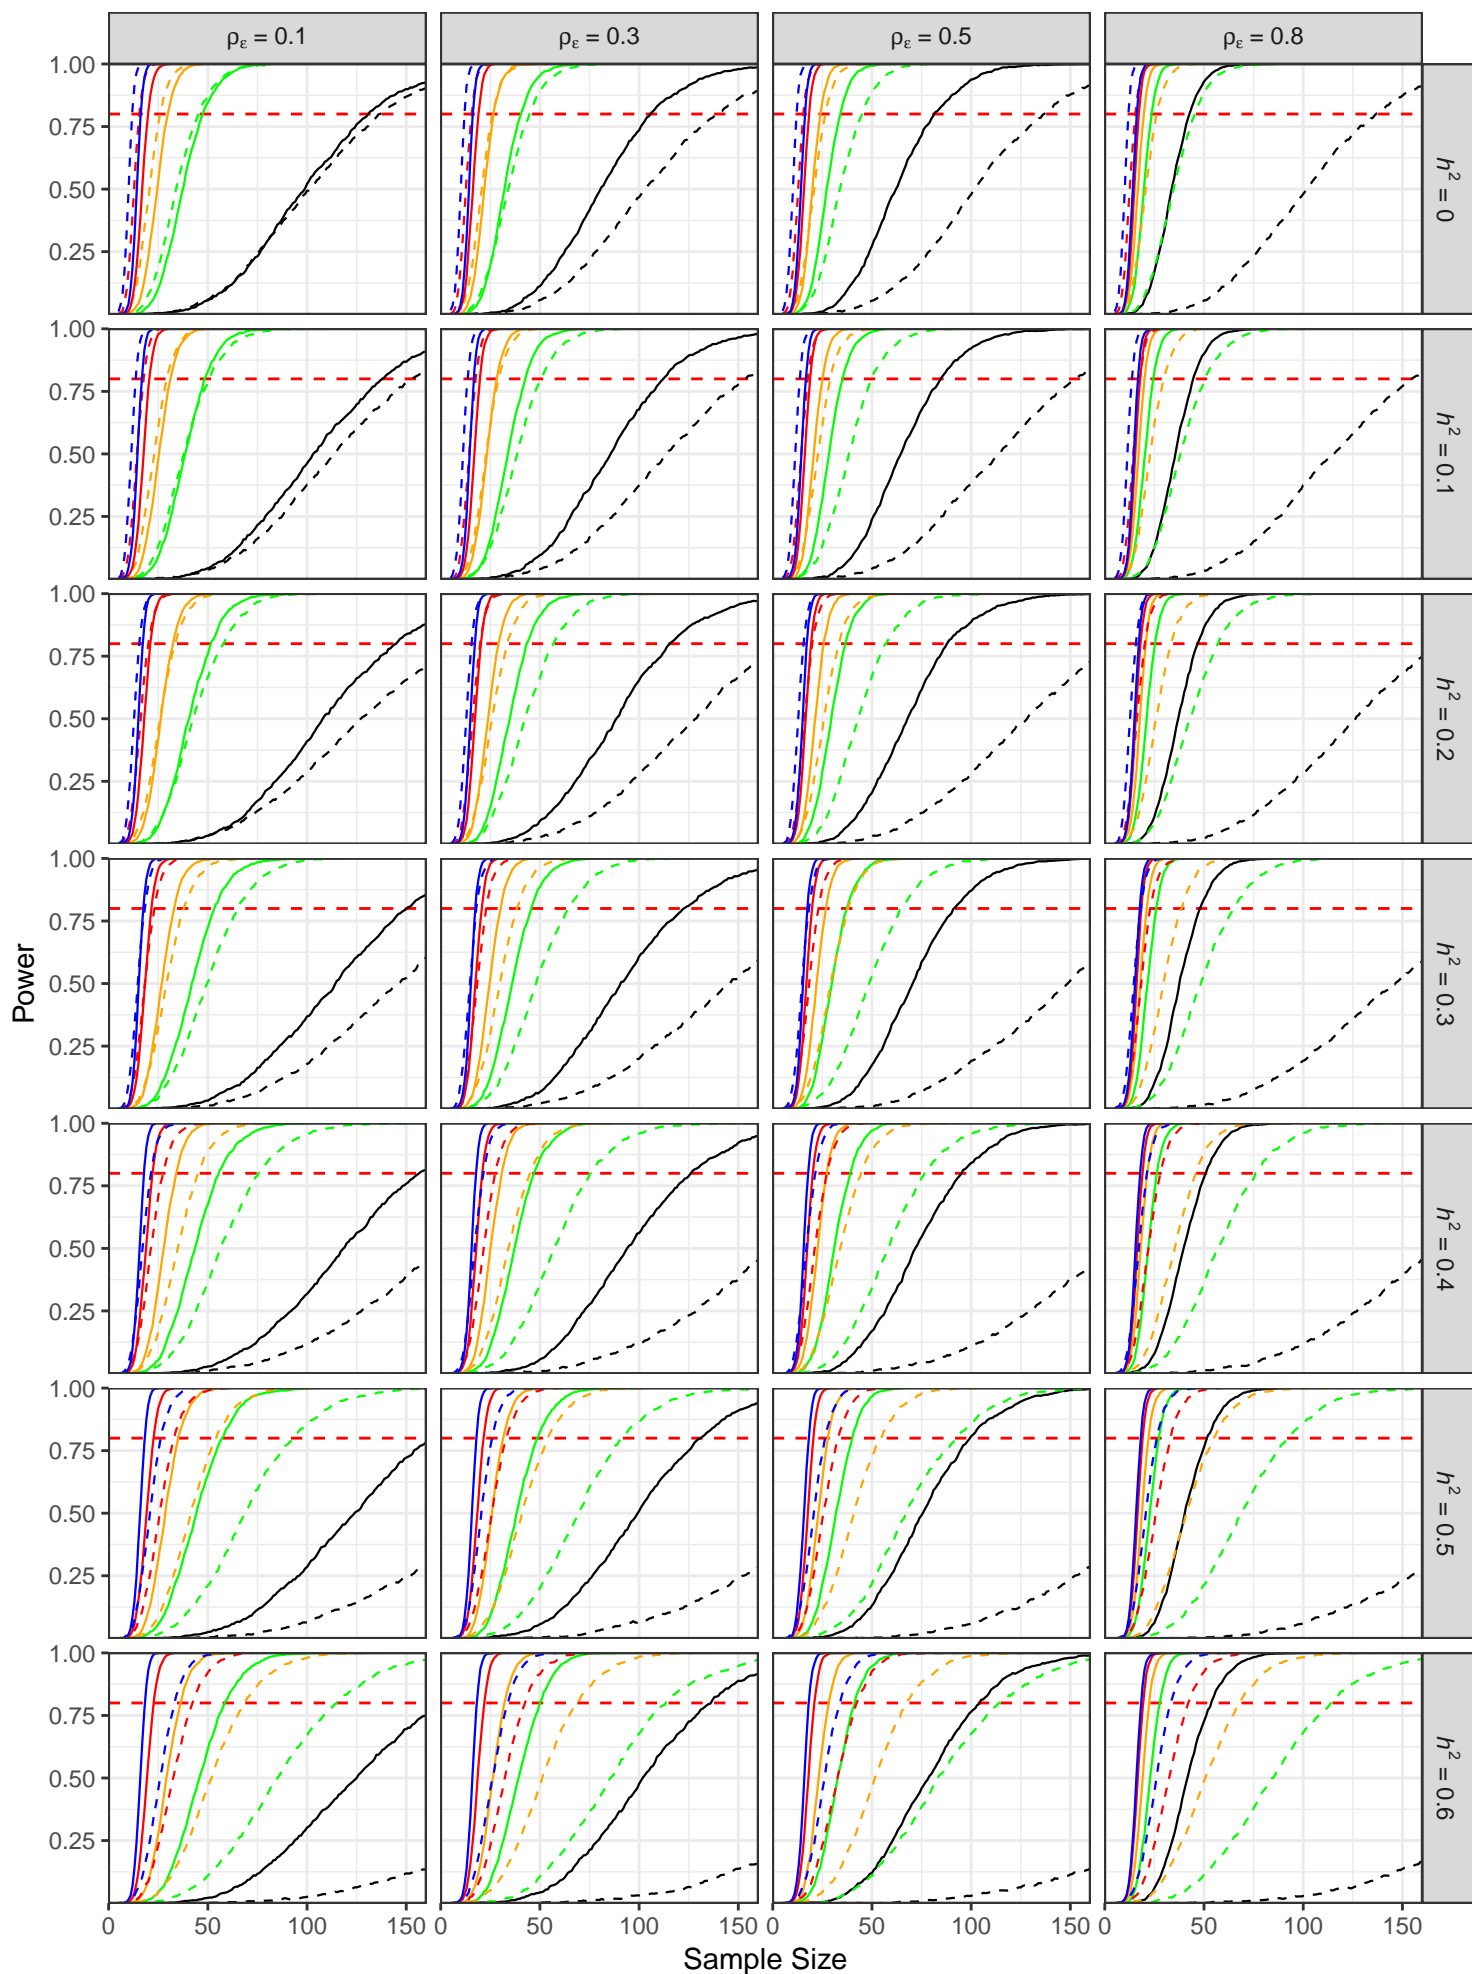



$P_K = 0$ ,  $E(M) = 3.36$ ,  $Var(M) = 0.06$

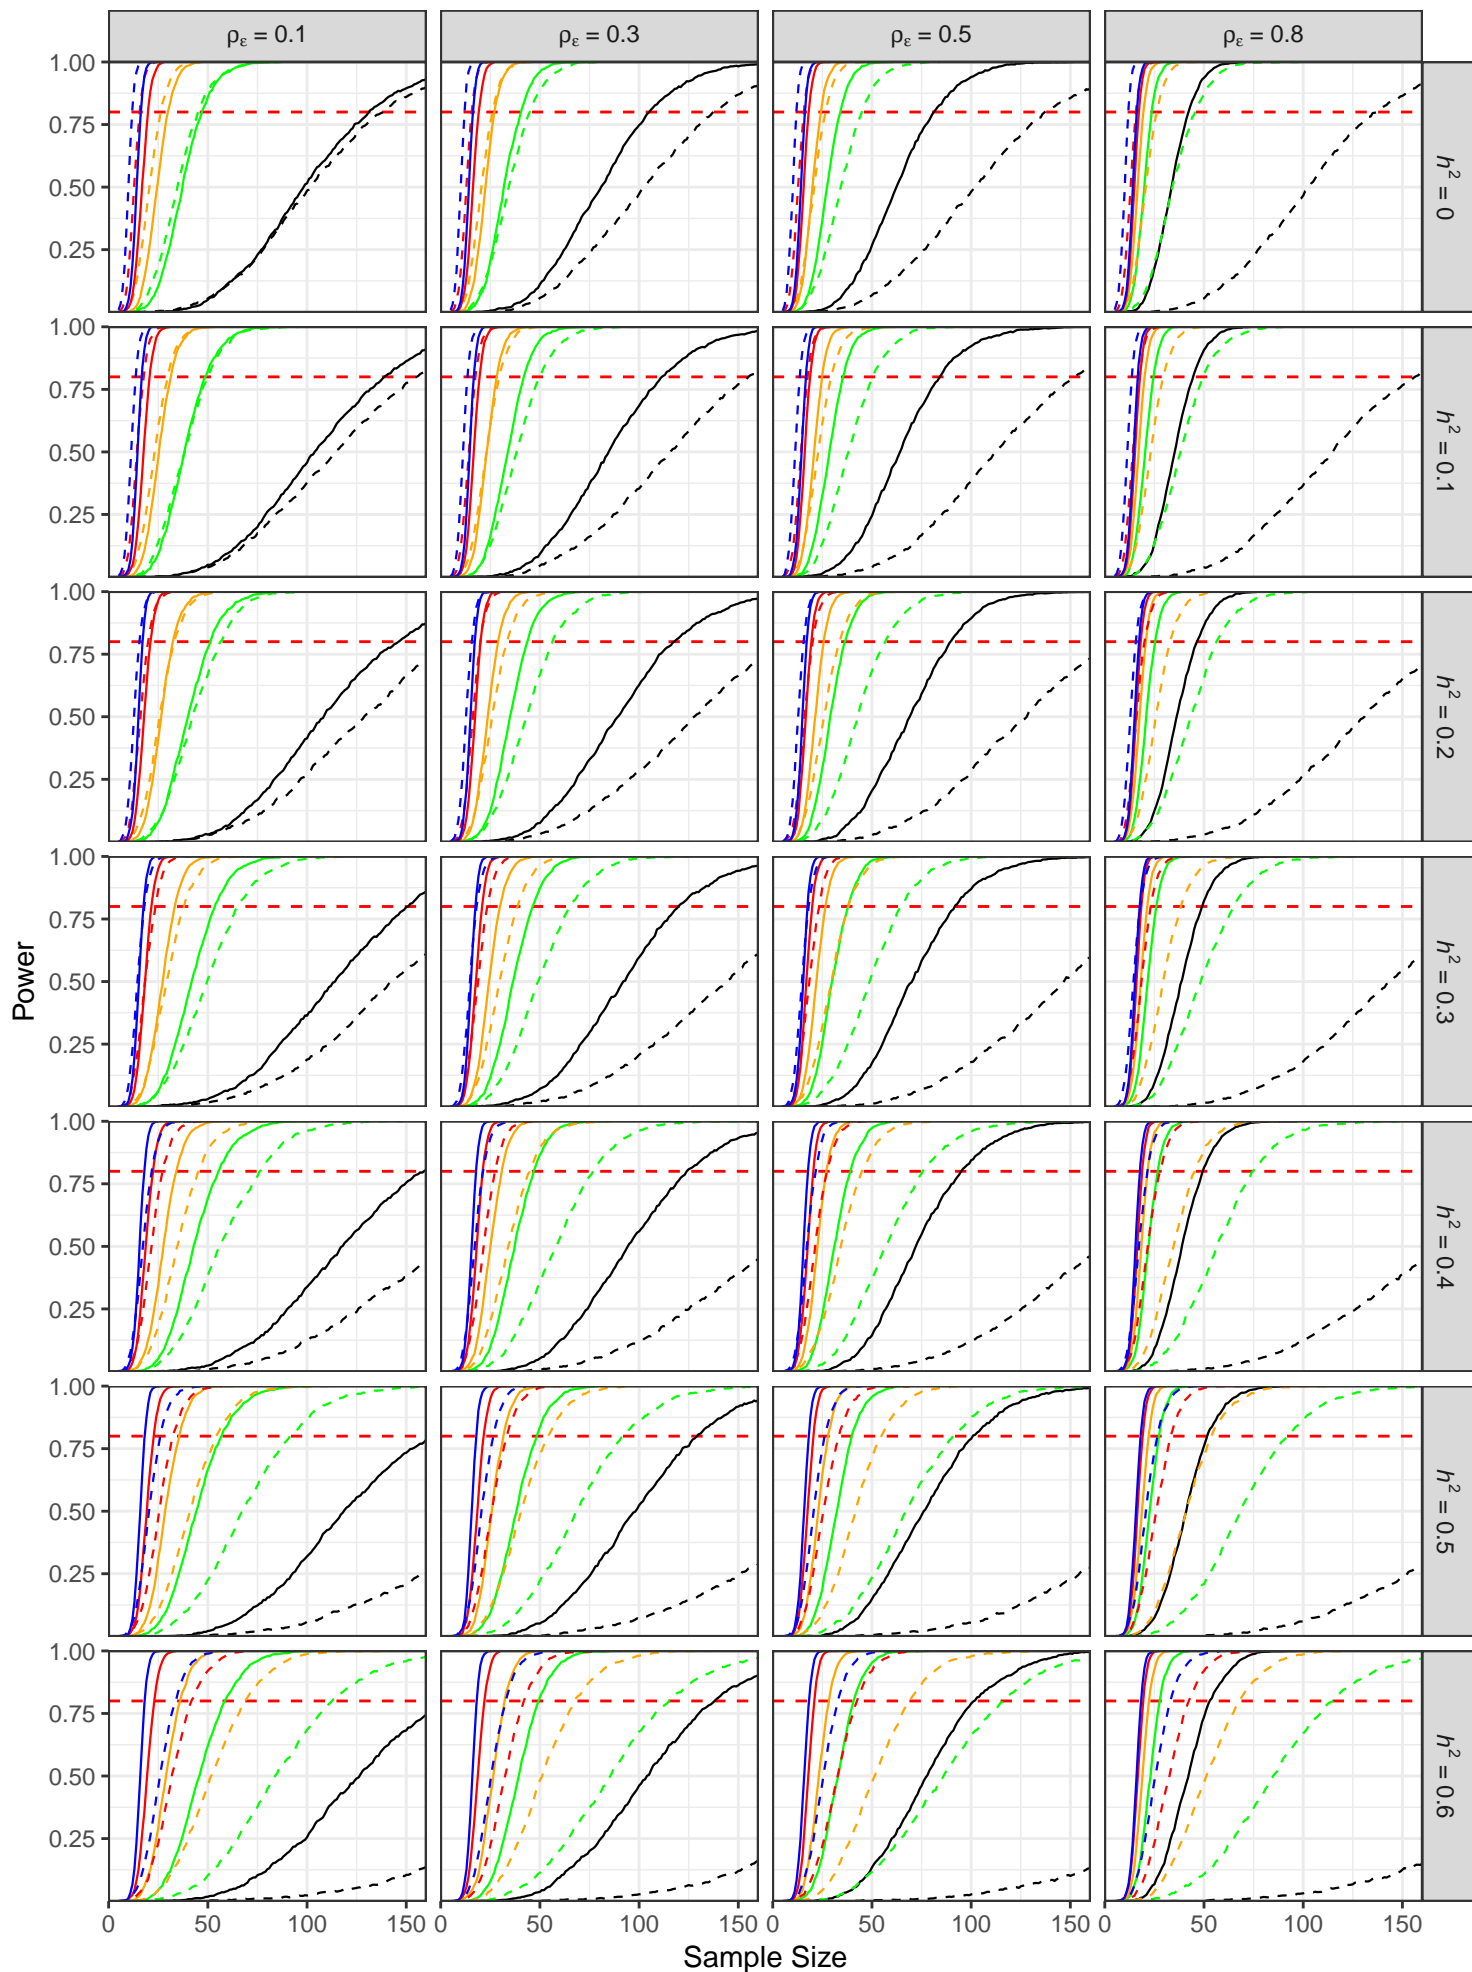

$$P_K = 0, E(M) = 3.36, \text{Var}(M) = 1$$

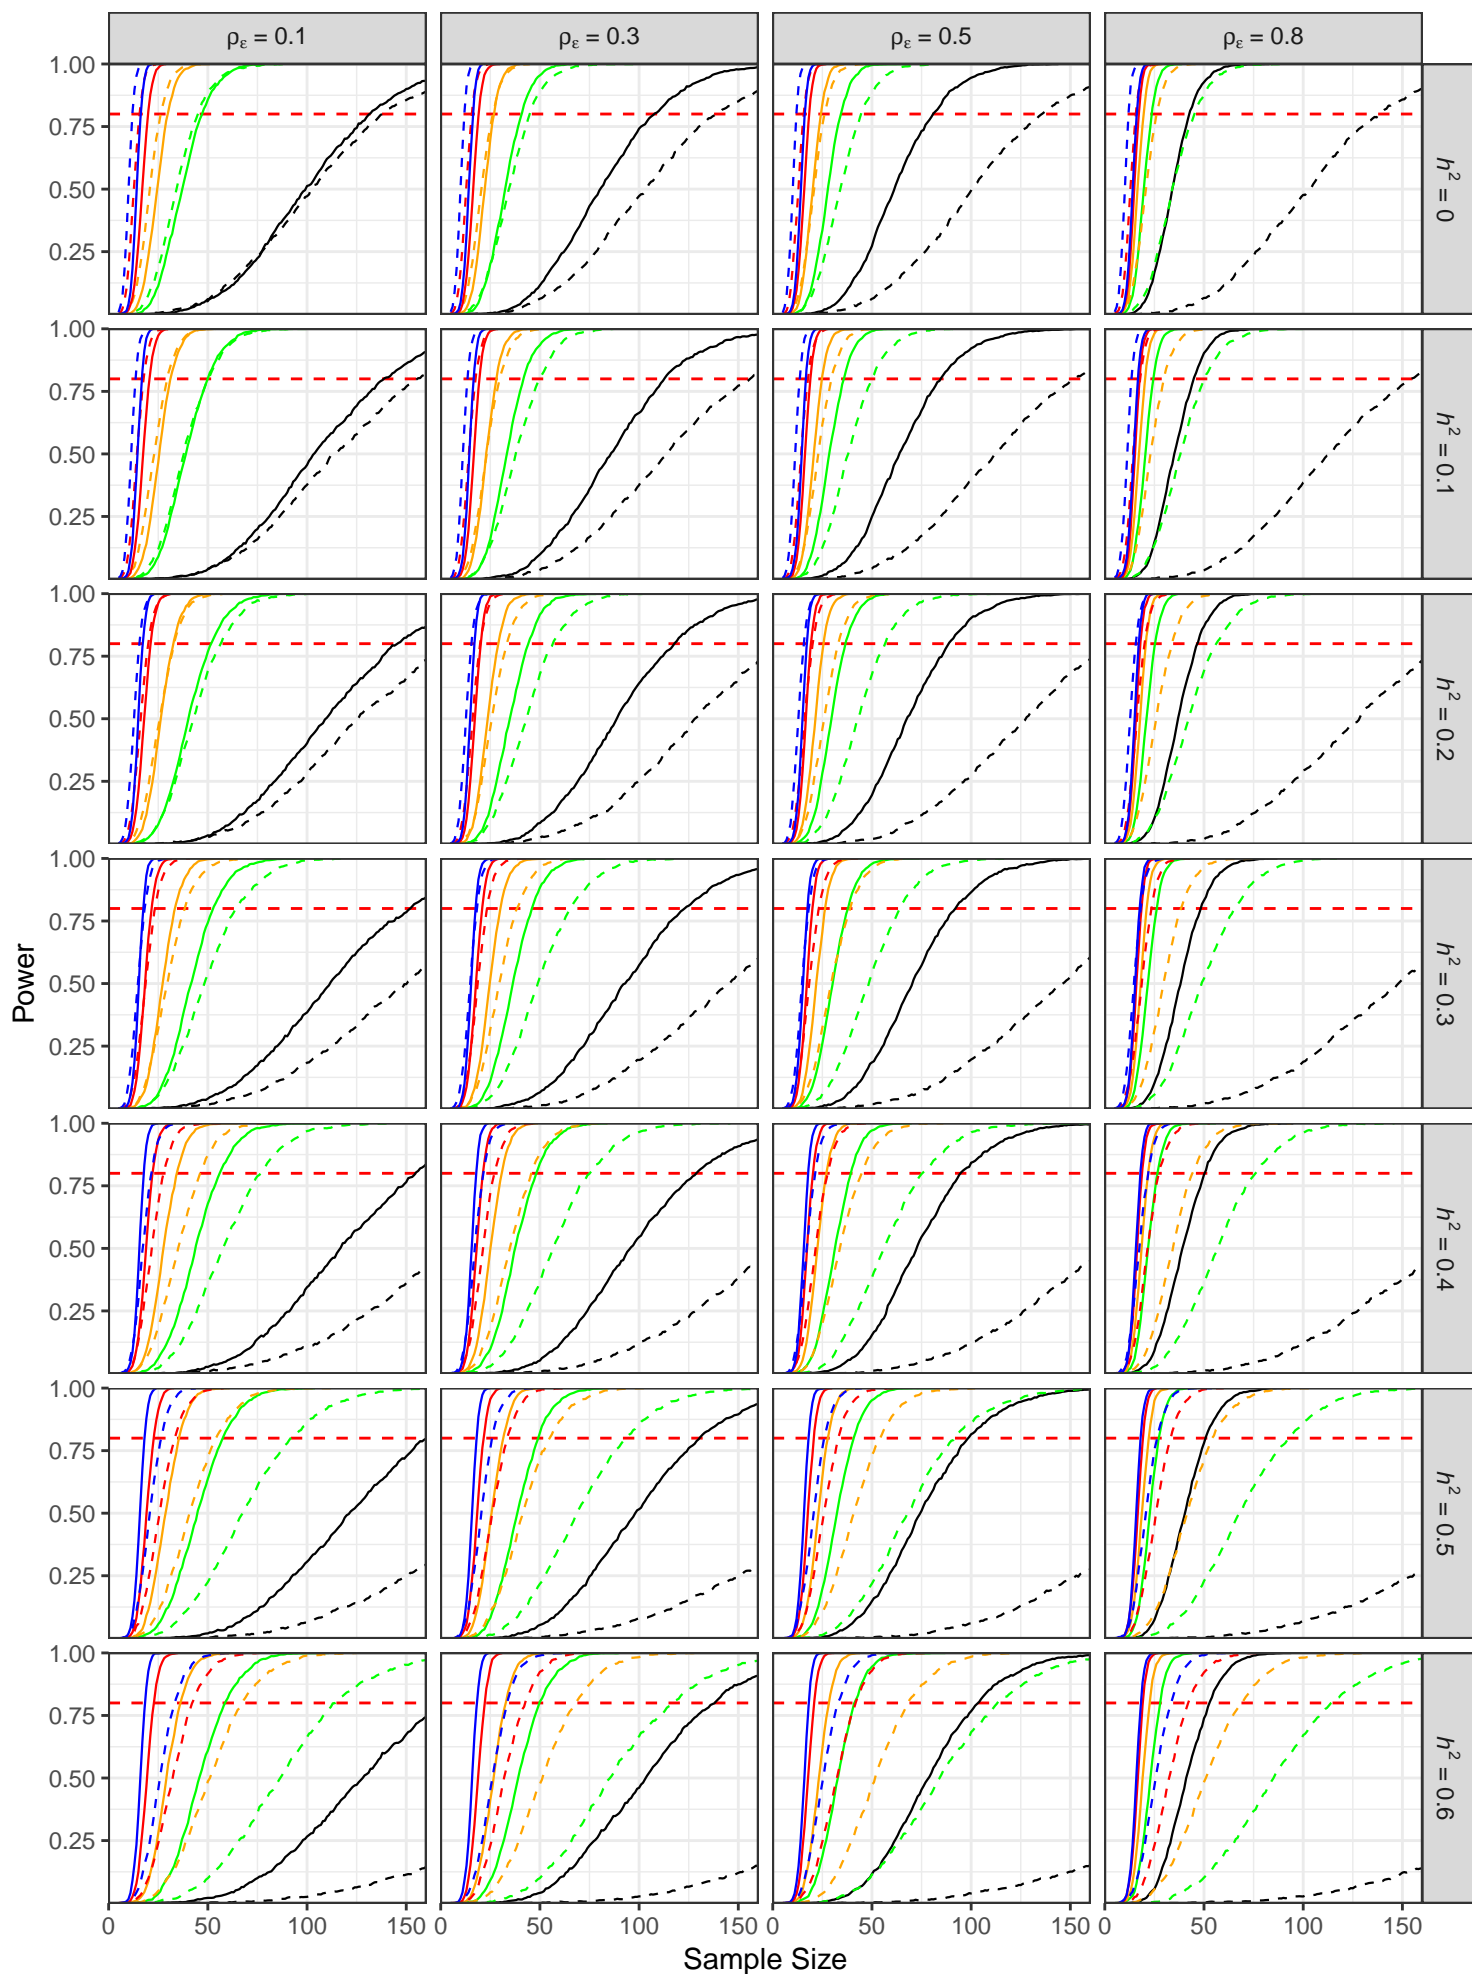

$P_K = 0$ ,  $E(M) = 3.36$ ,  $Var(M) = 2$

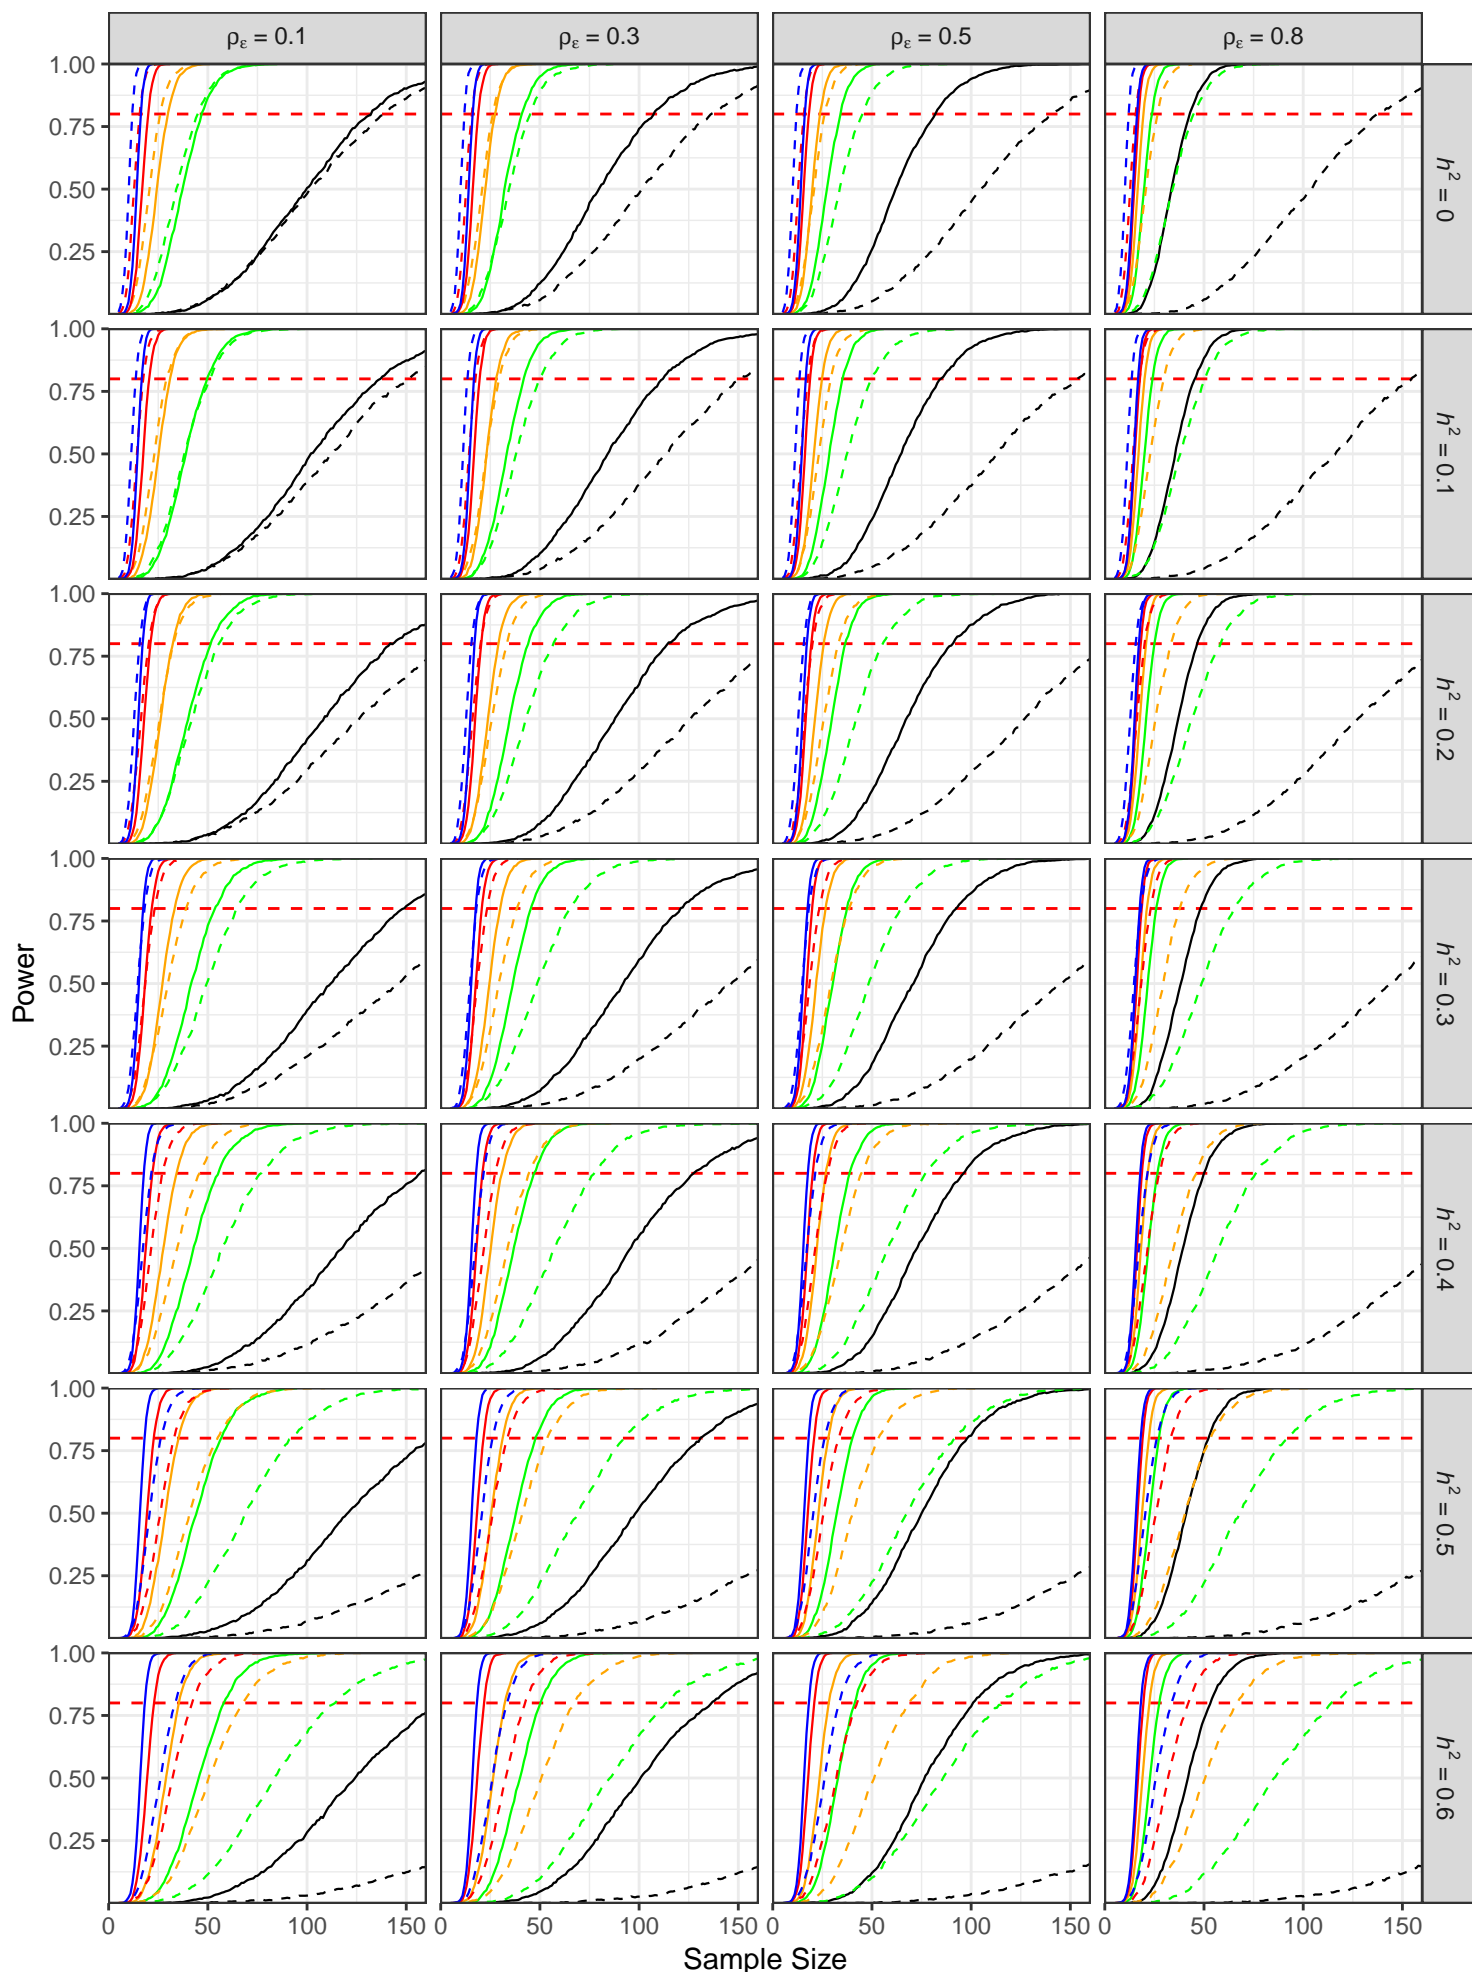



$P_K = 0$ ,  $E(M) = 3.36$ ,  $Var(M) = 3$

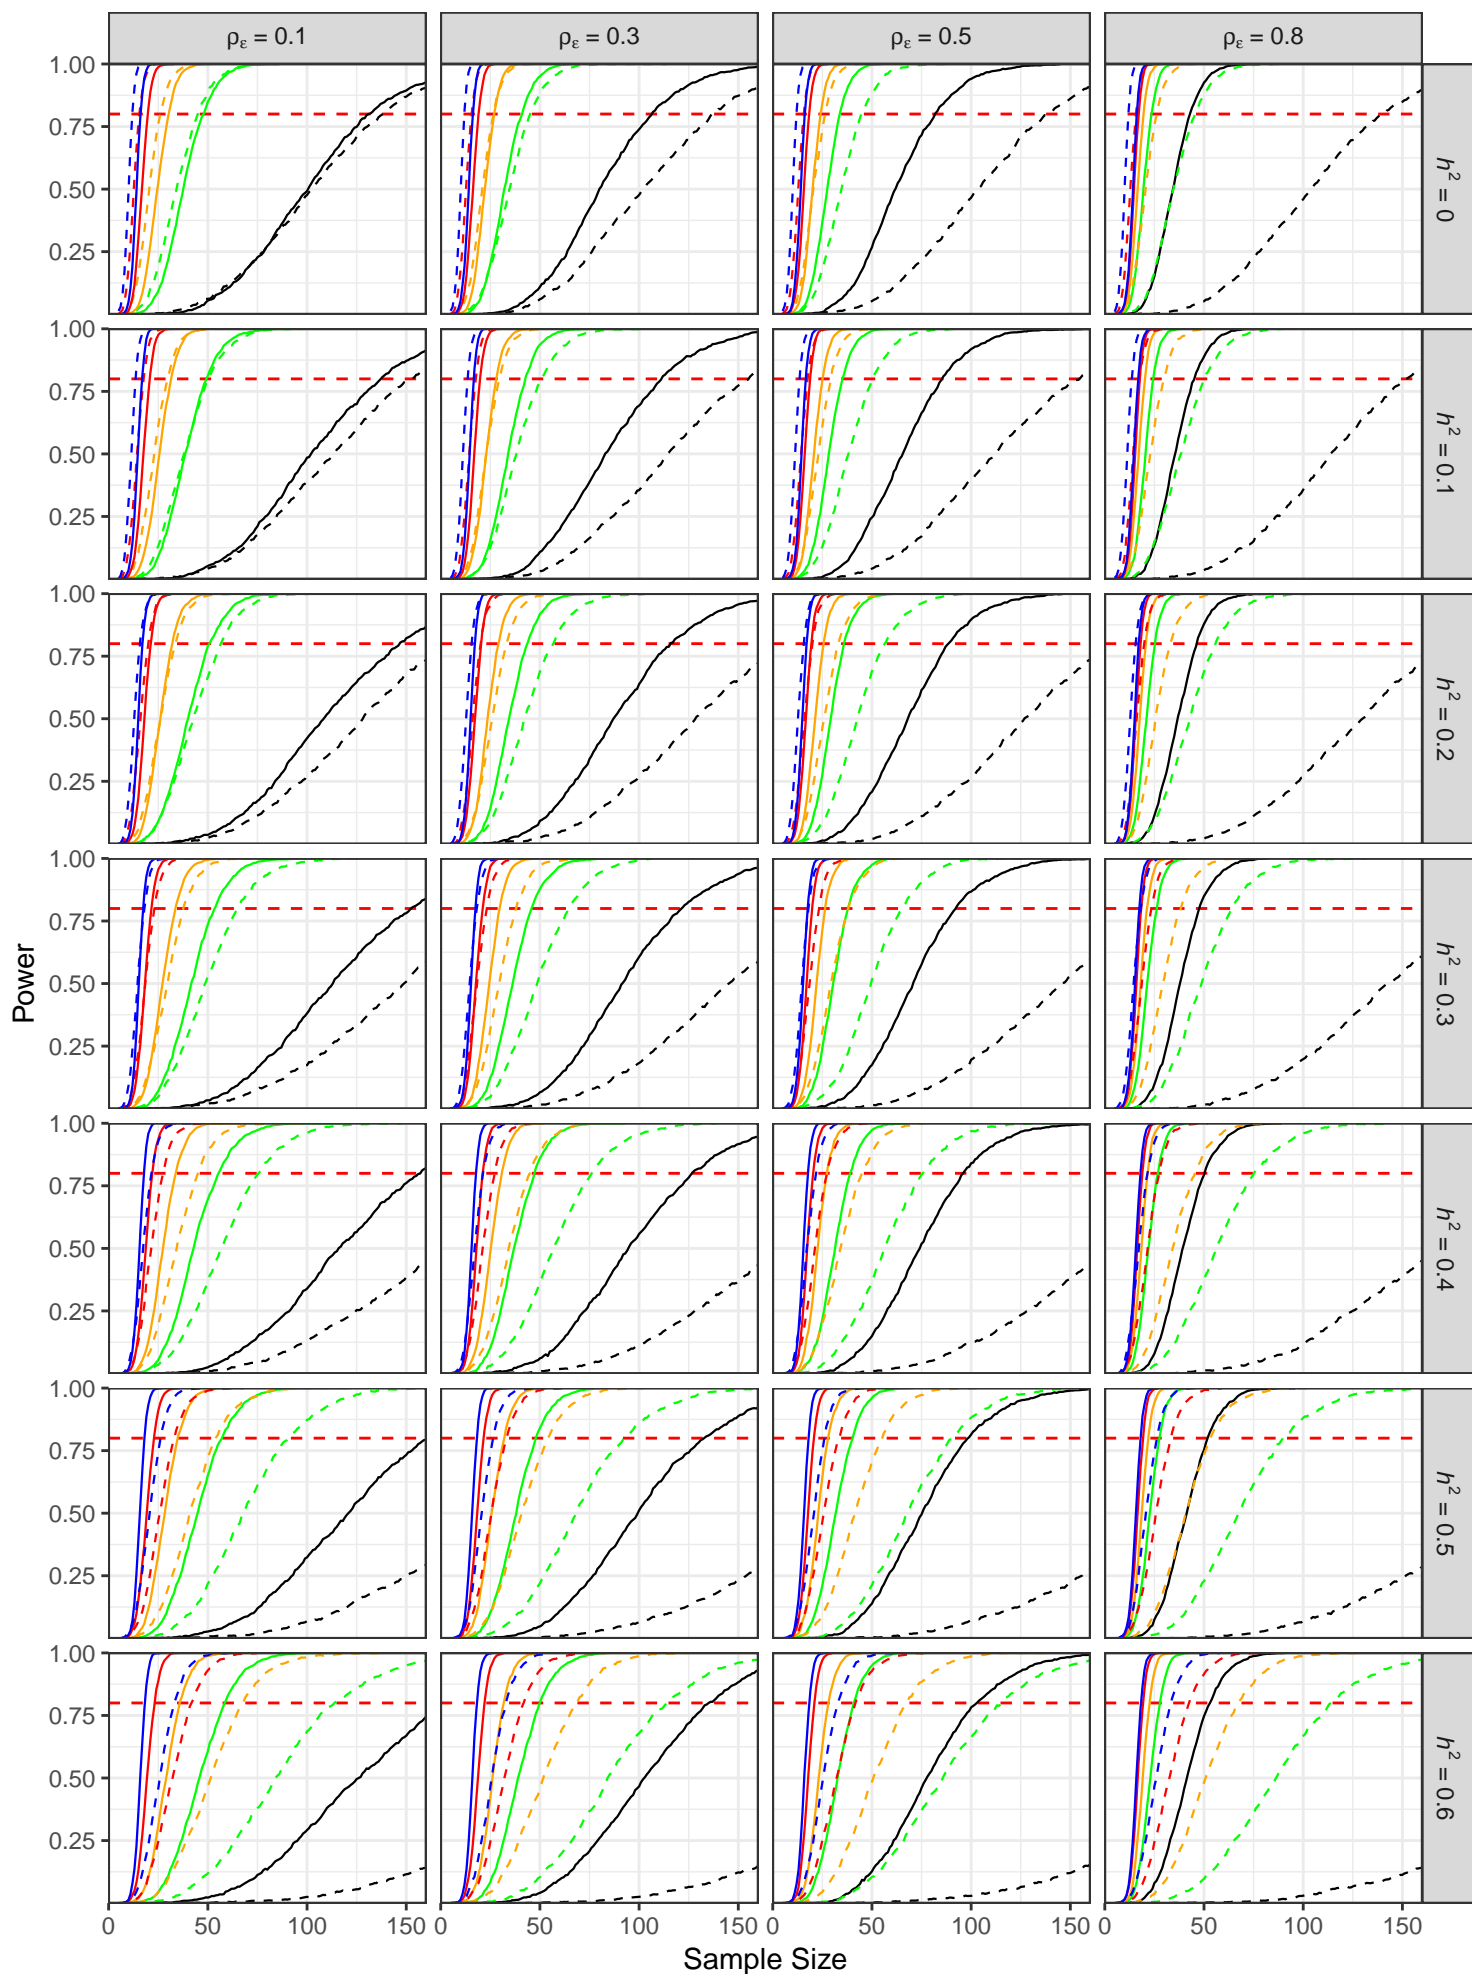

$P_K = 0$ ,  $E(M) = 3.36$ ,  $Var(M) = 4$

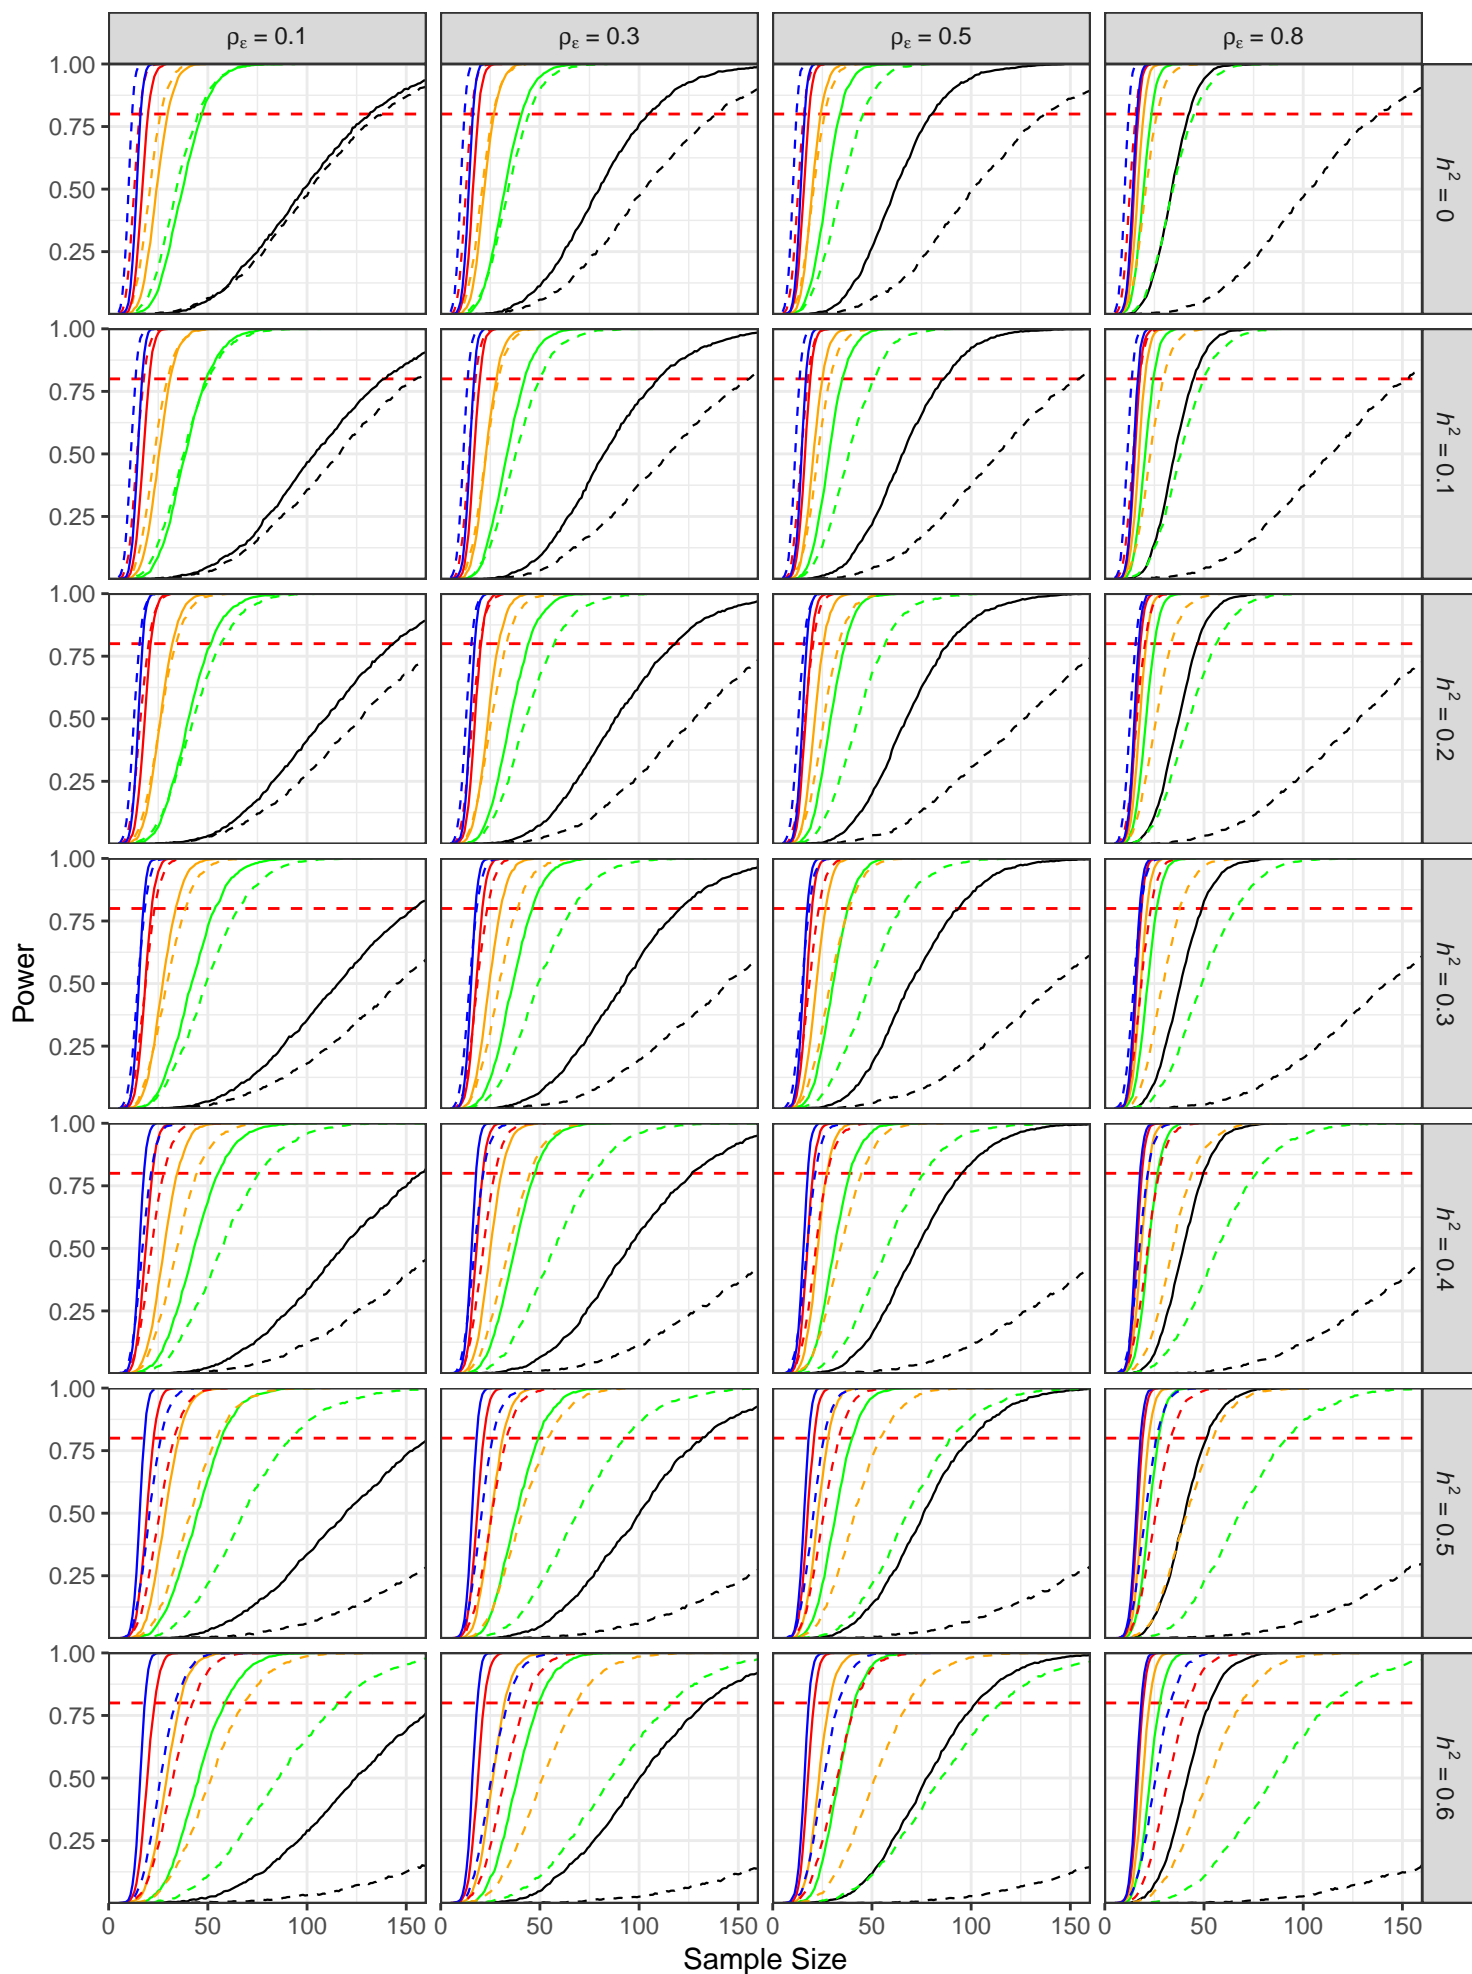

$P_K = 0.05$ ,  $E(M) = -3.78$ ,  $\text{Var}(M) = 0.06$

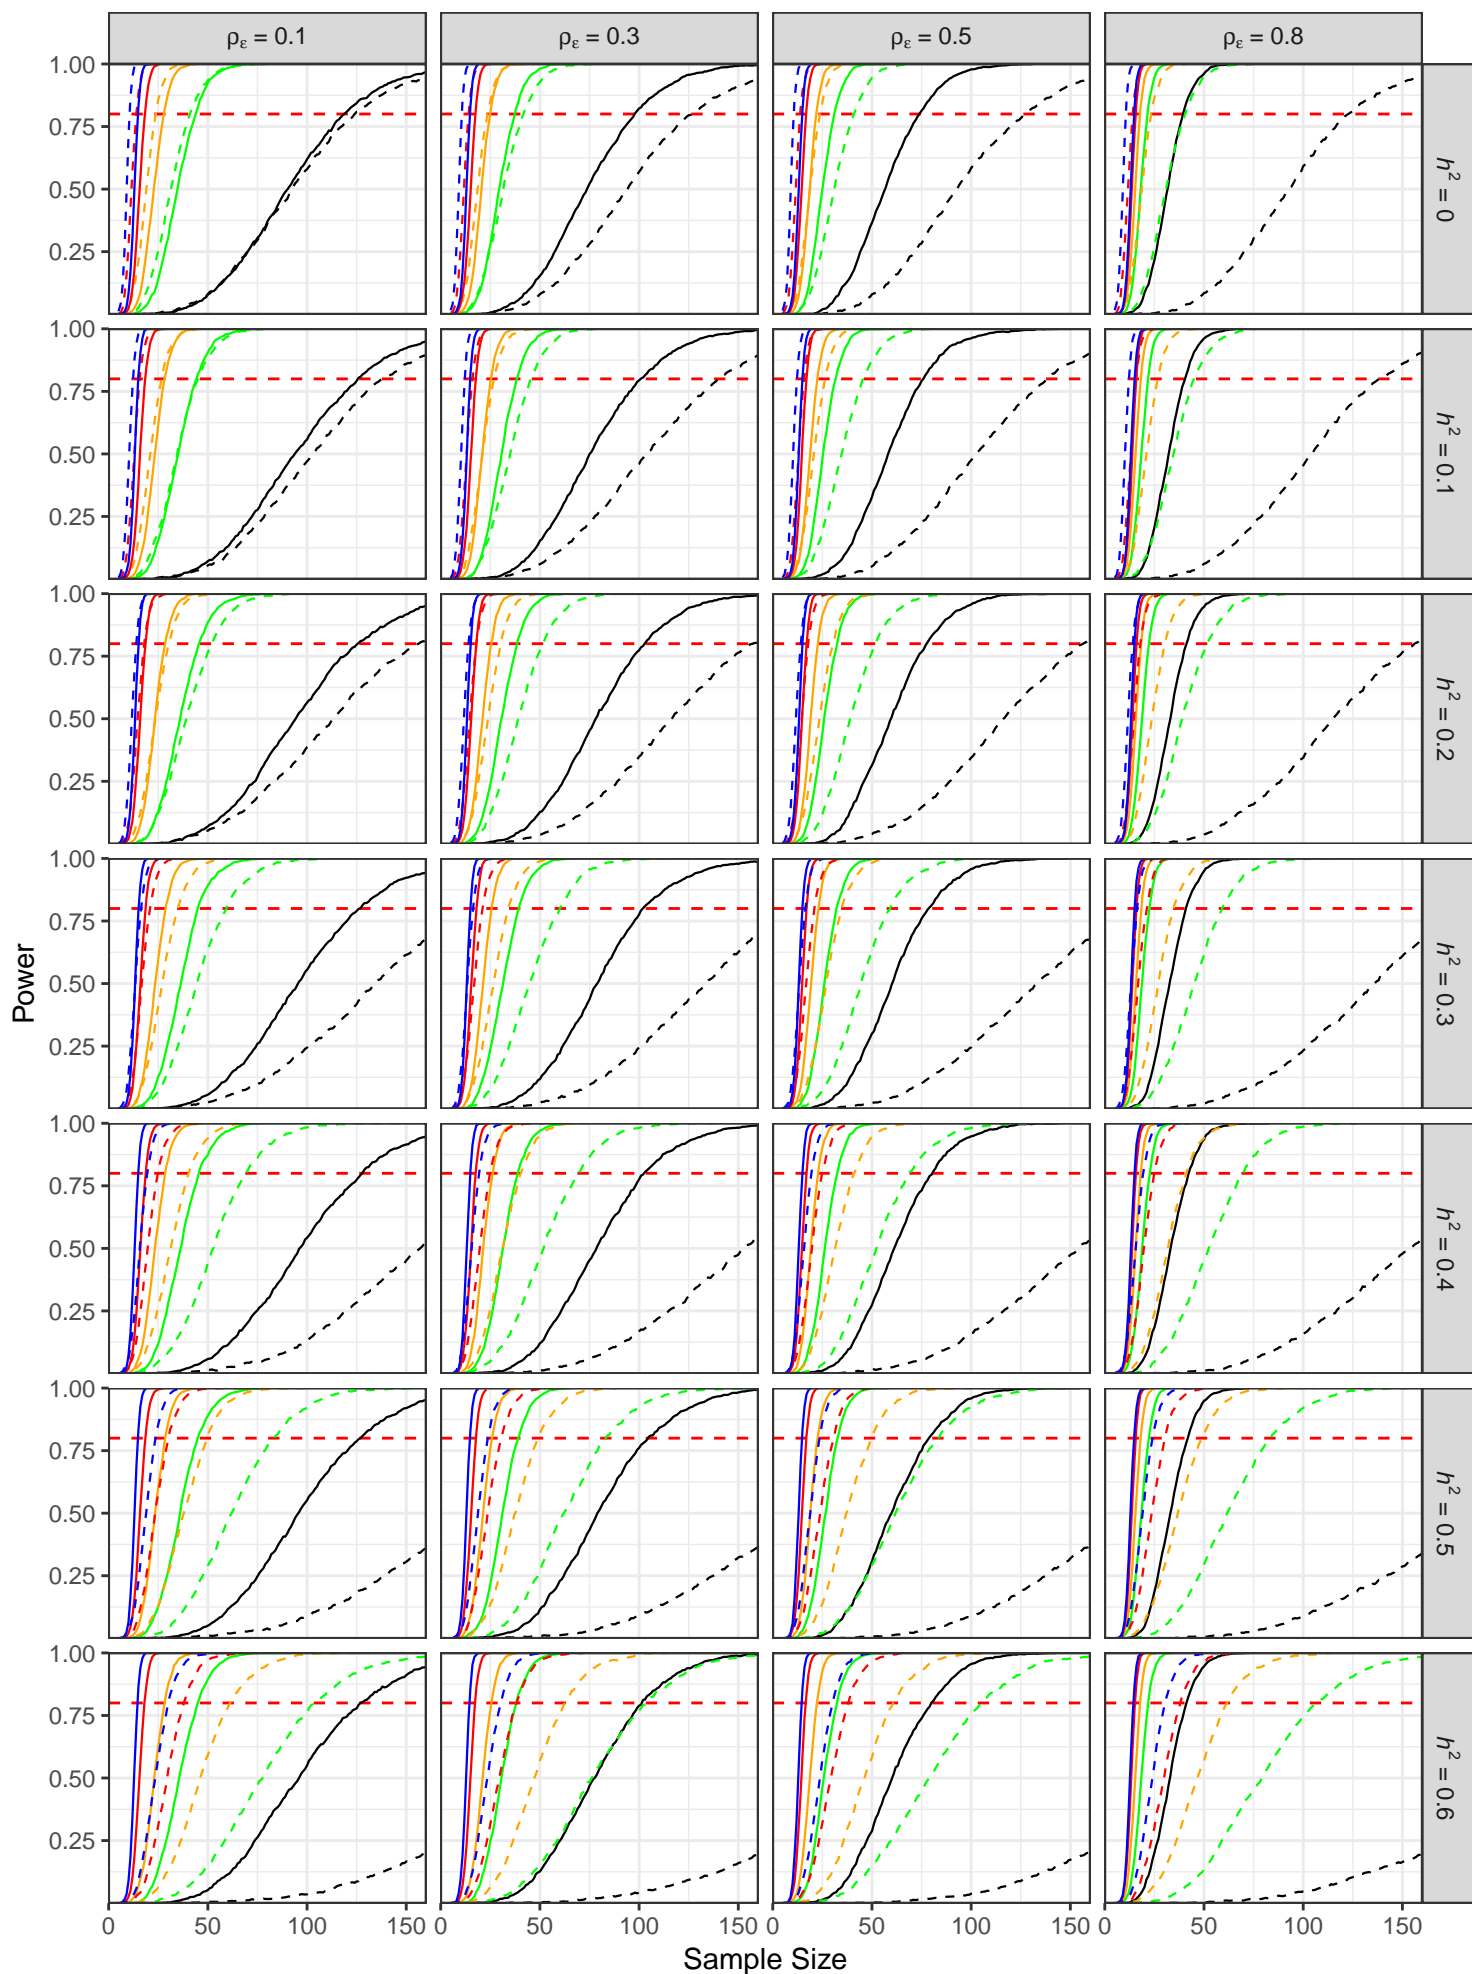

$P_K = 0.05$ ,  $E(M) = -3.78$ ,  $\text{Var}(M) = 1$

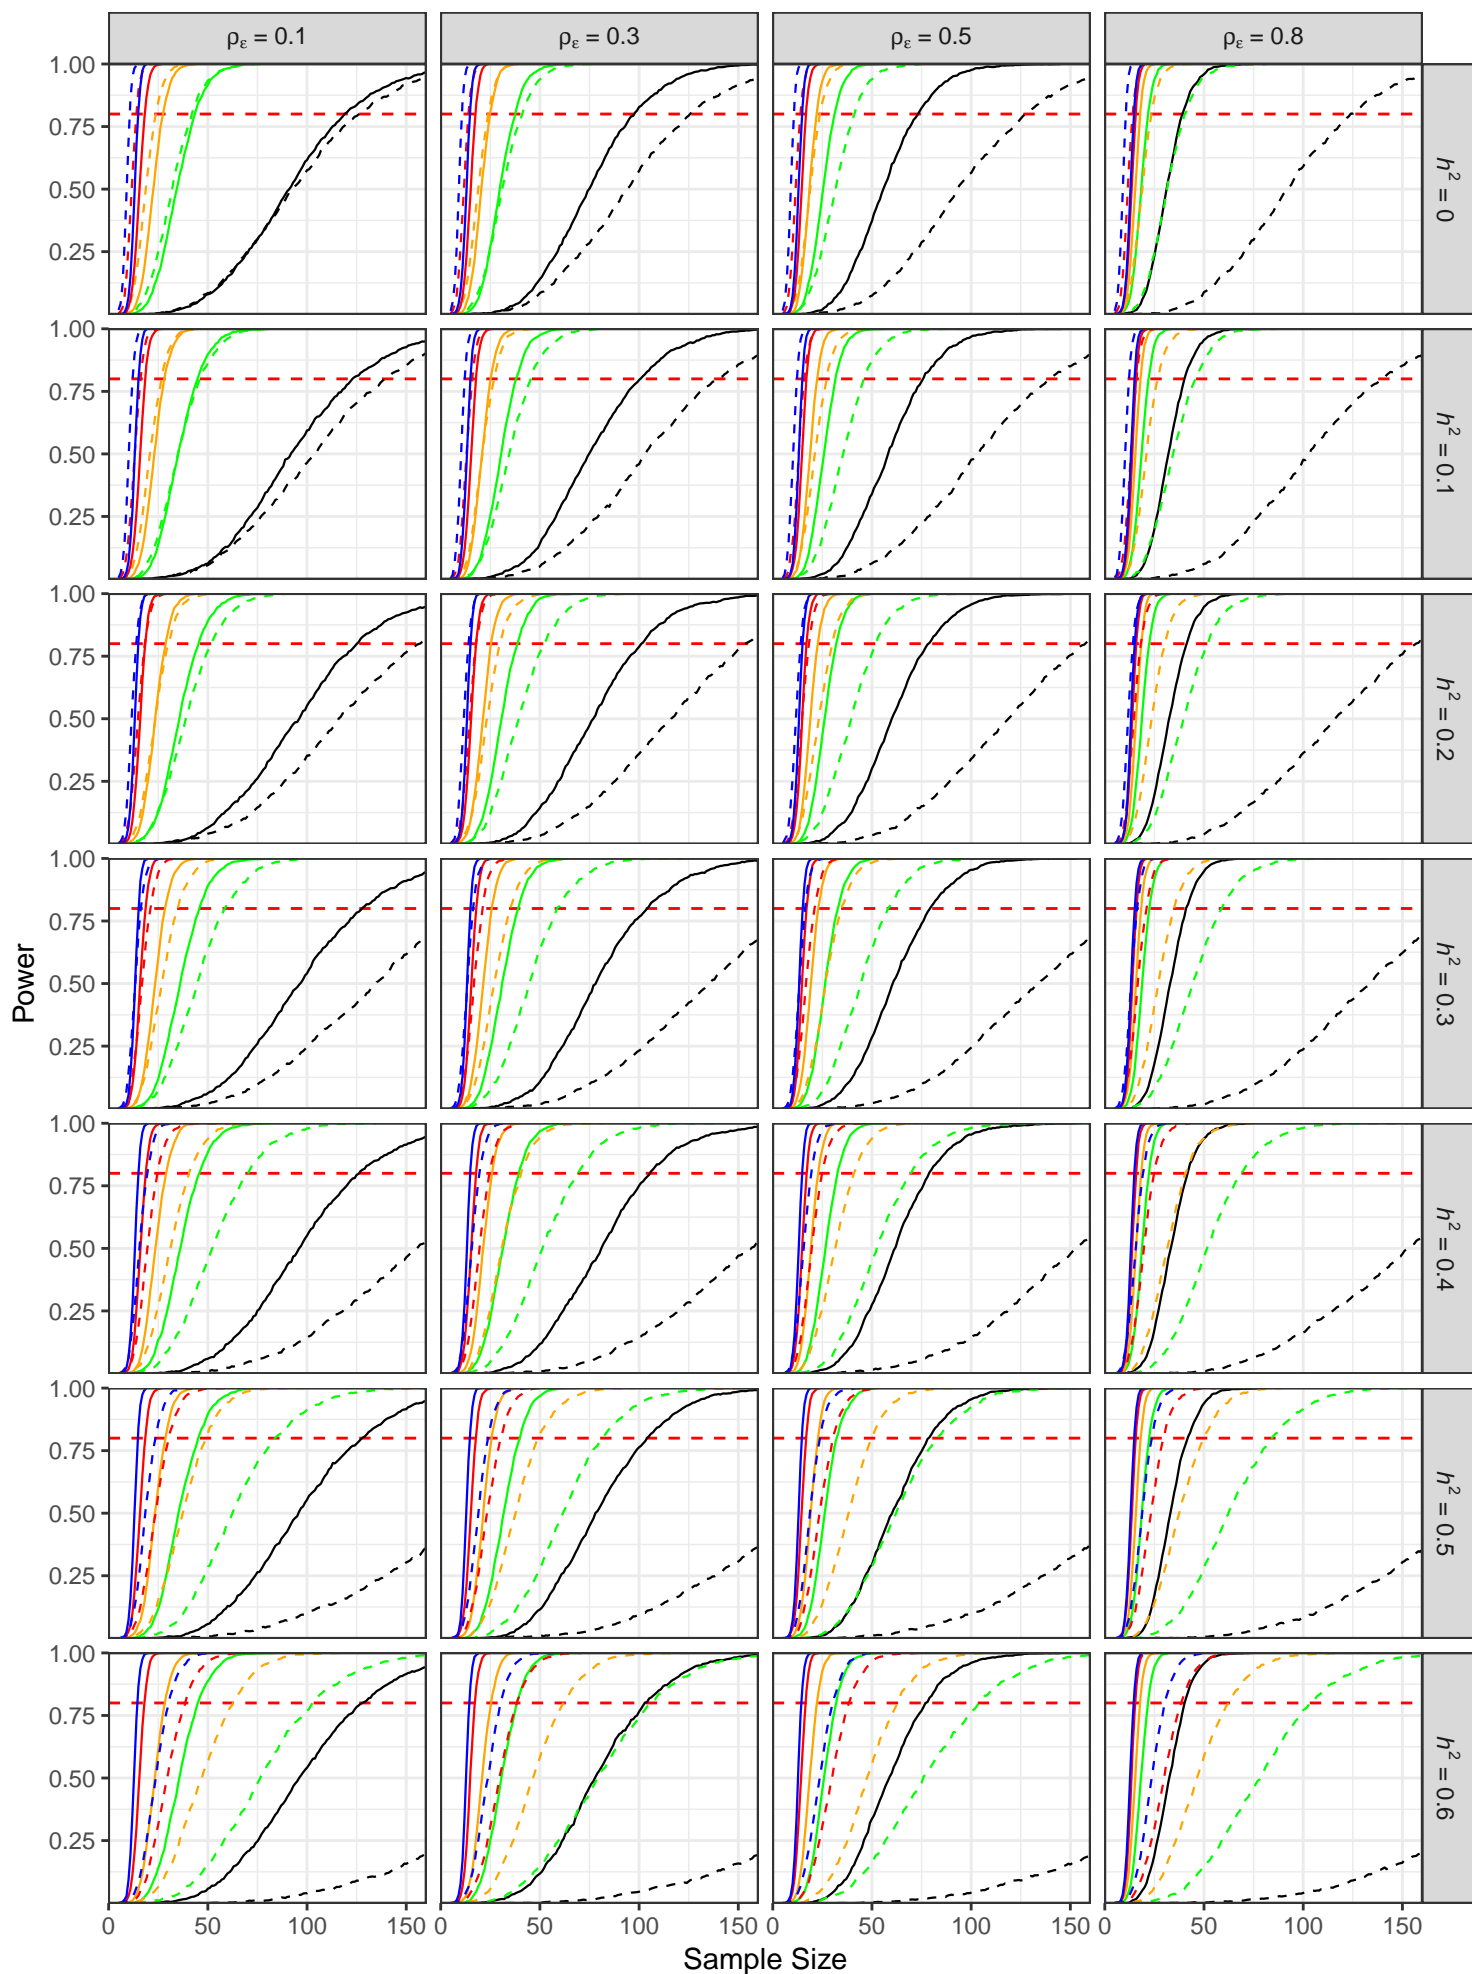

$P_K = 0.05$ ,  $E(M) = -3.78$ ,  $\text{Var}(M) = 2$

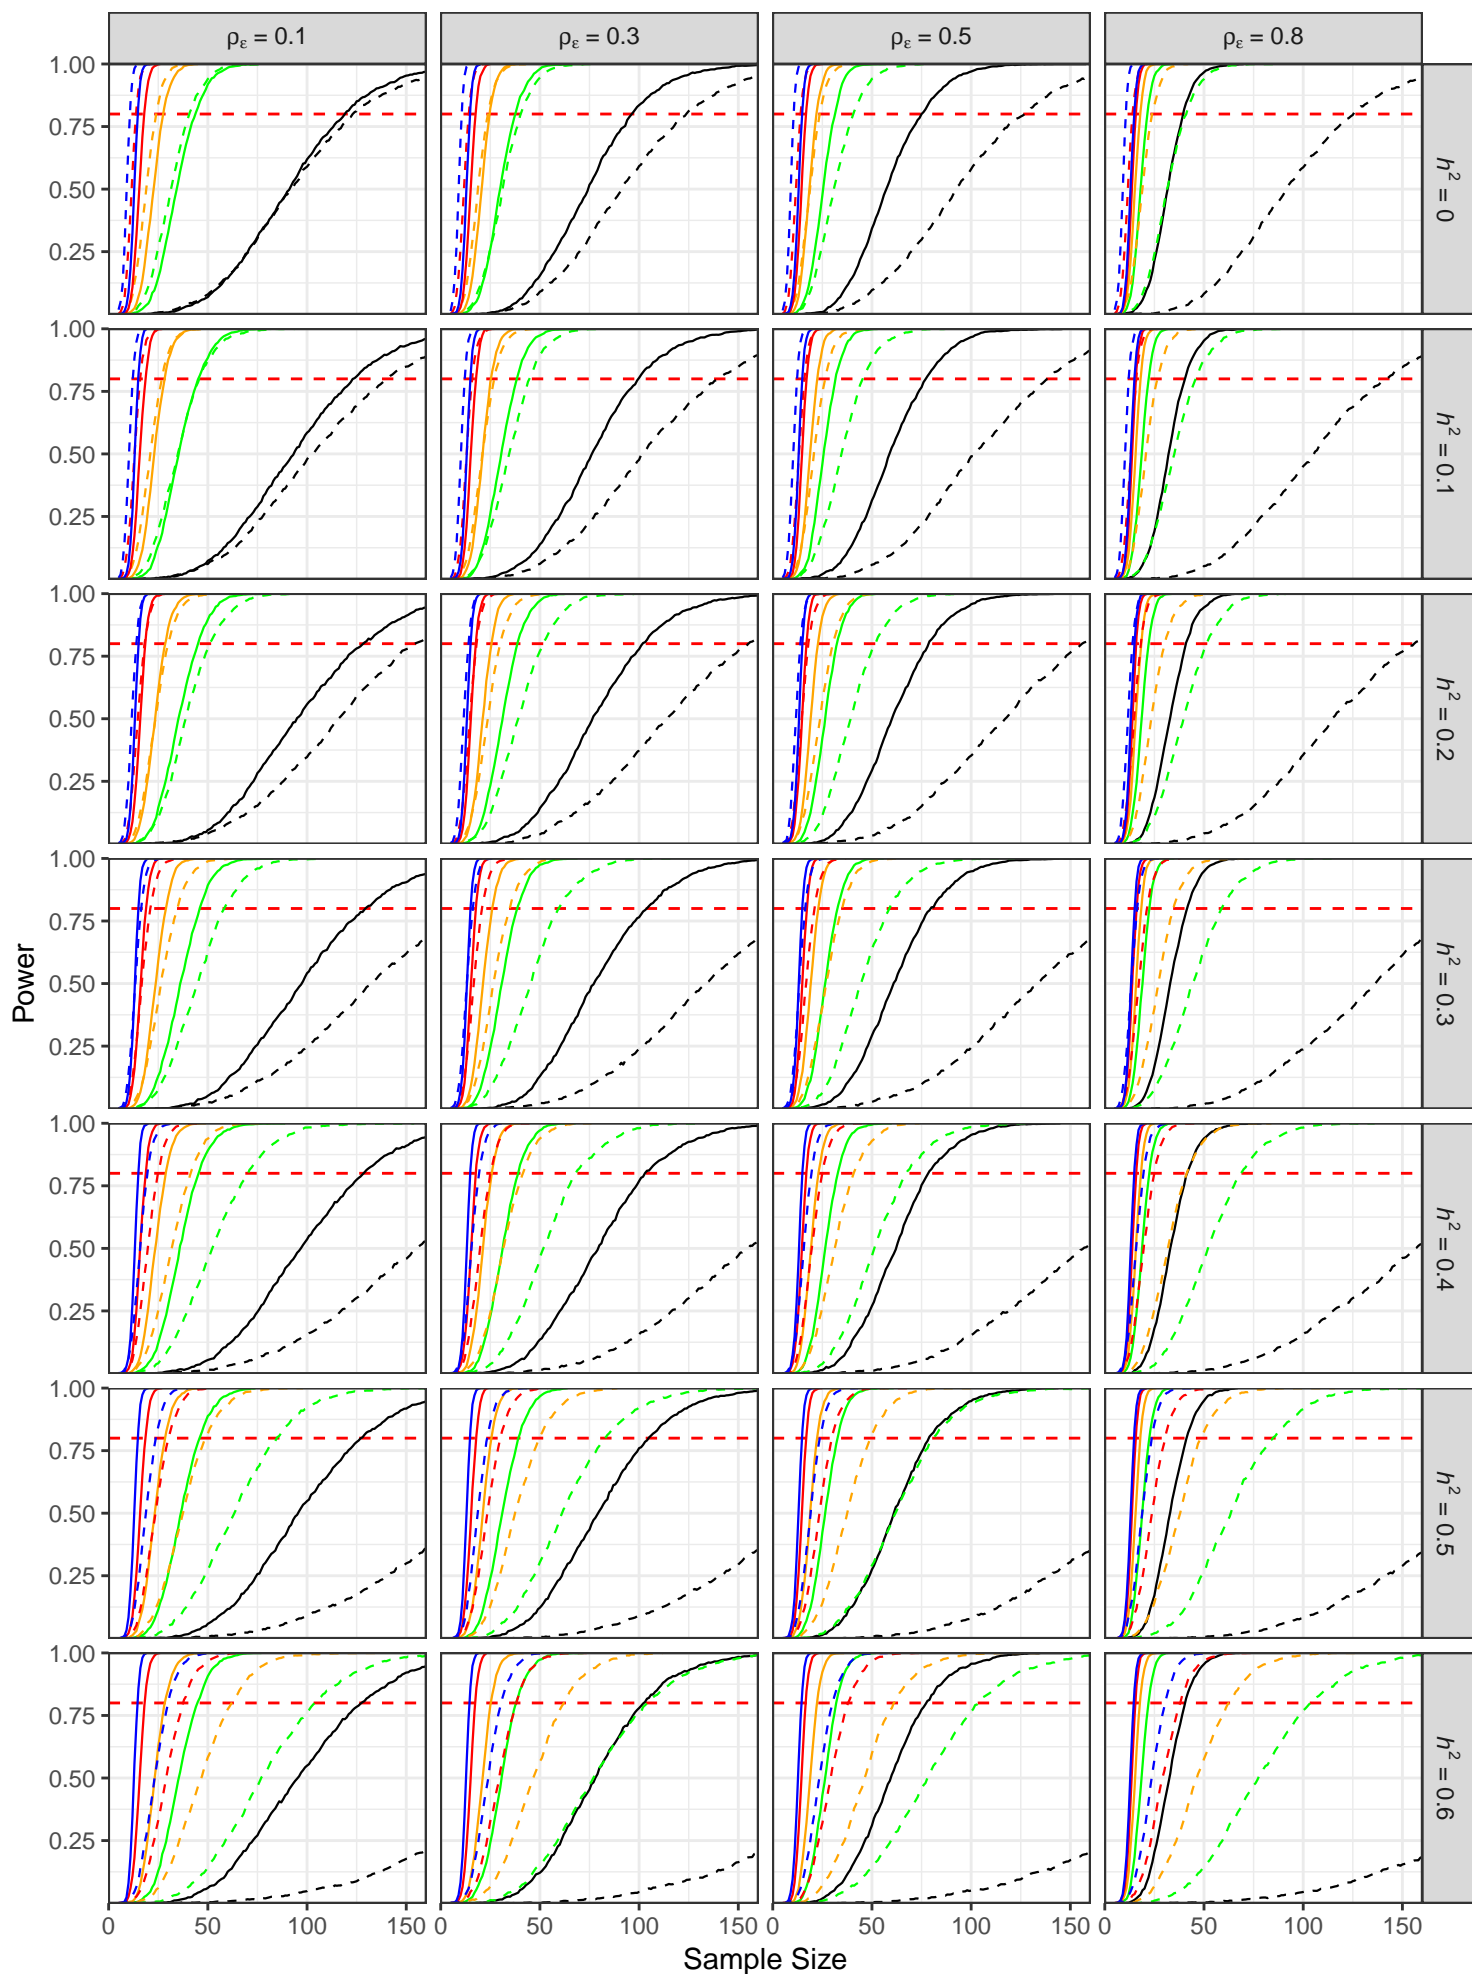



$P_K = 0.05$ ,  $E(M) = -3.78$ ,  $\text{Var}(M) = 3$

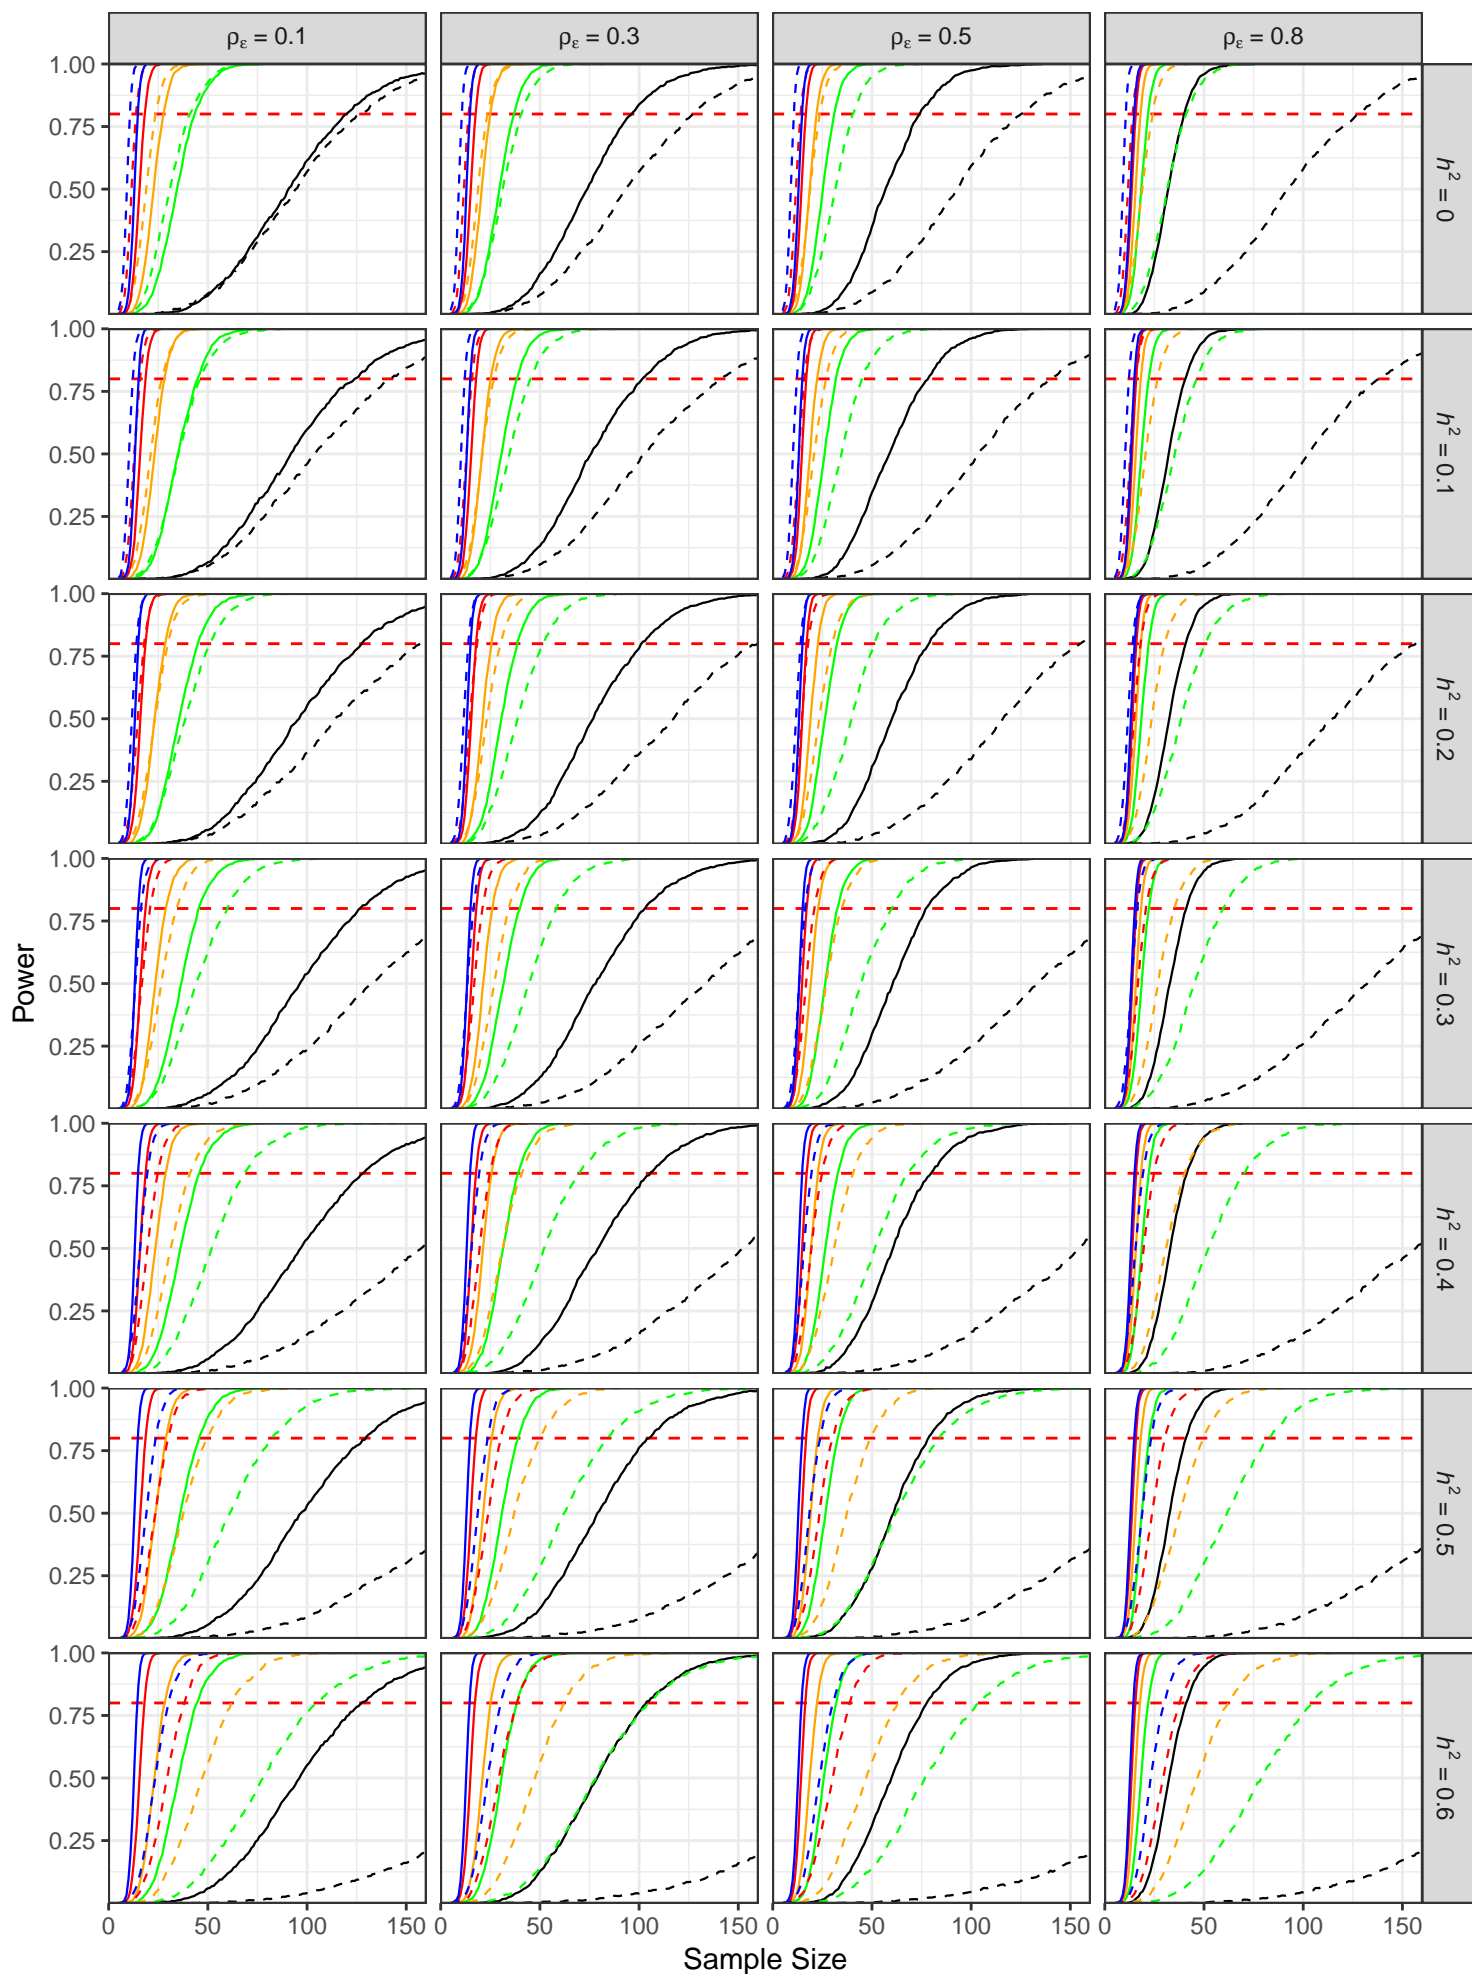

$P_K = 0.05$ ,  $E(M) = -3.78$ ,  $Var(M) = 4$

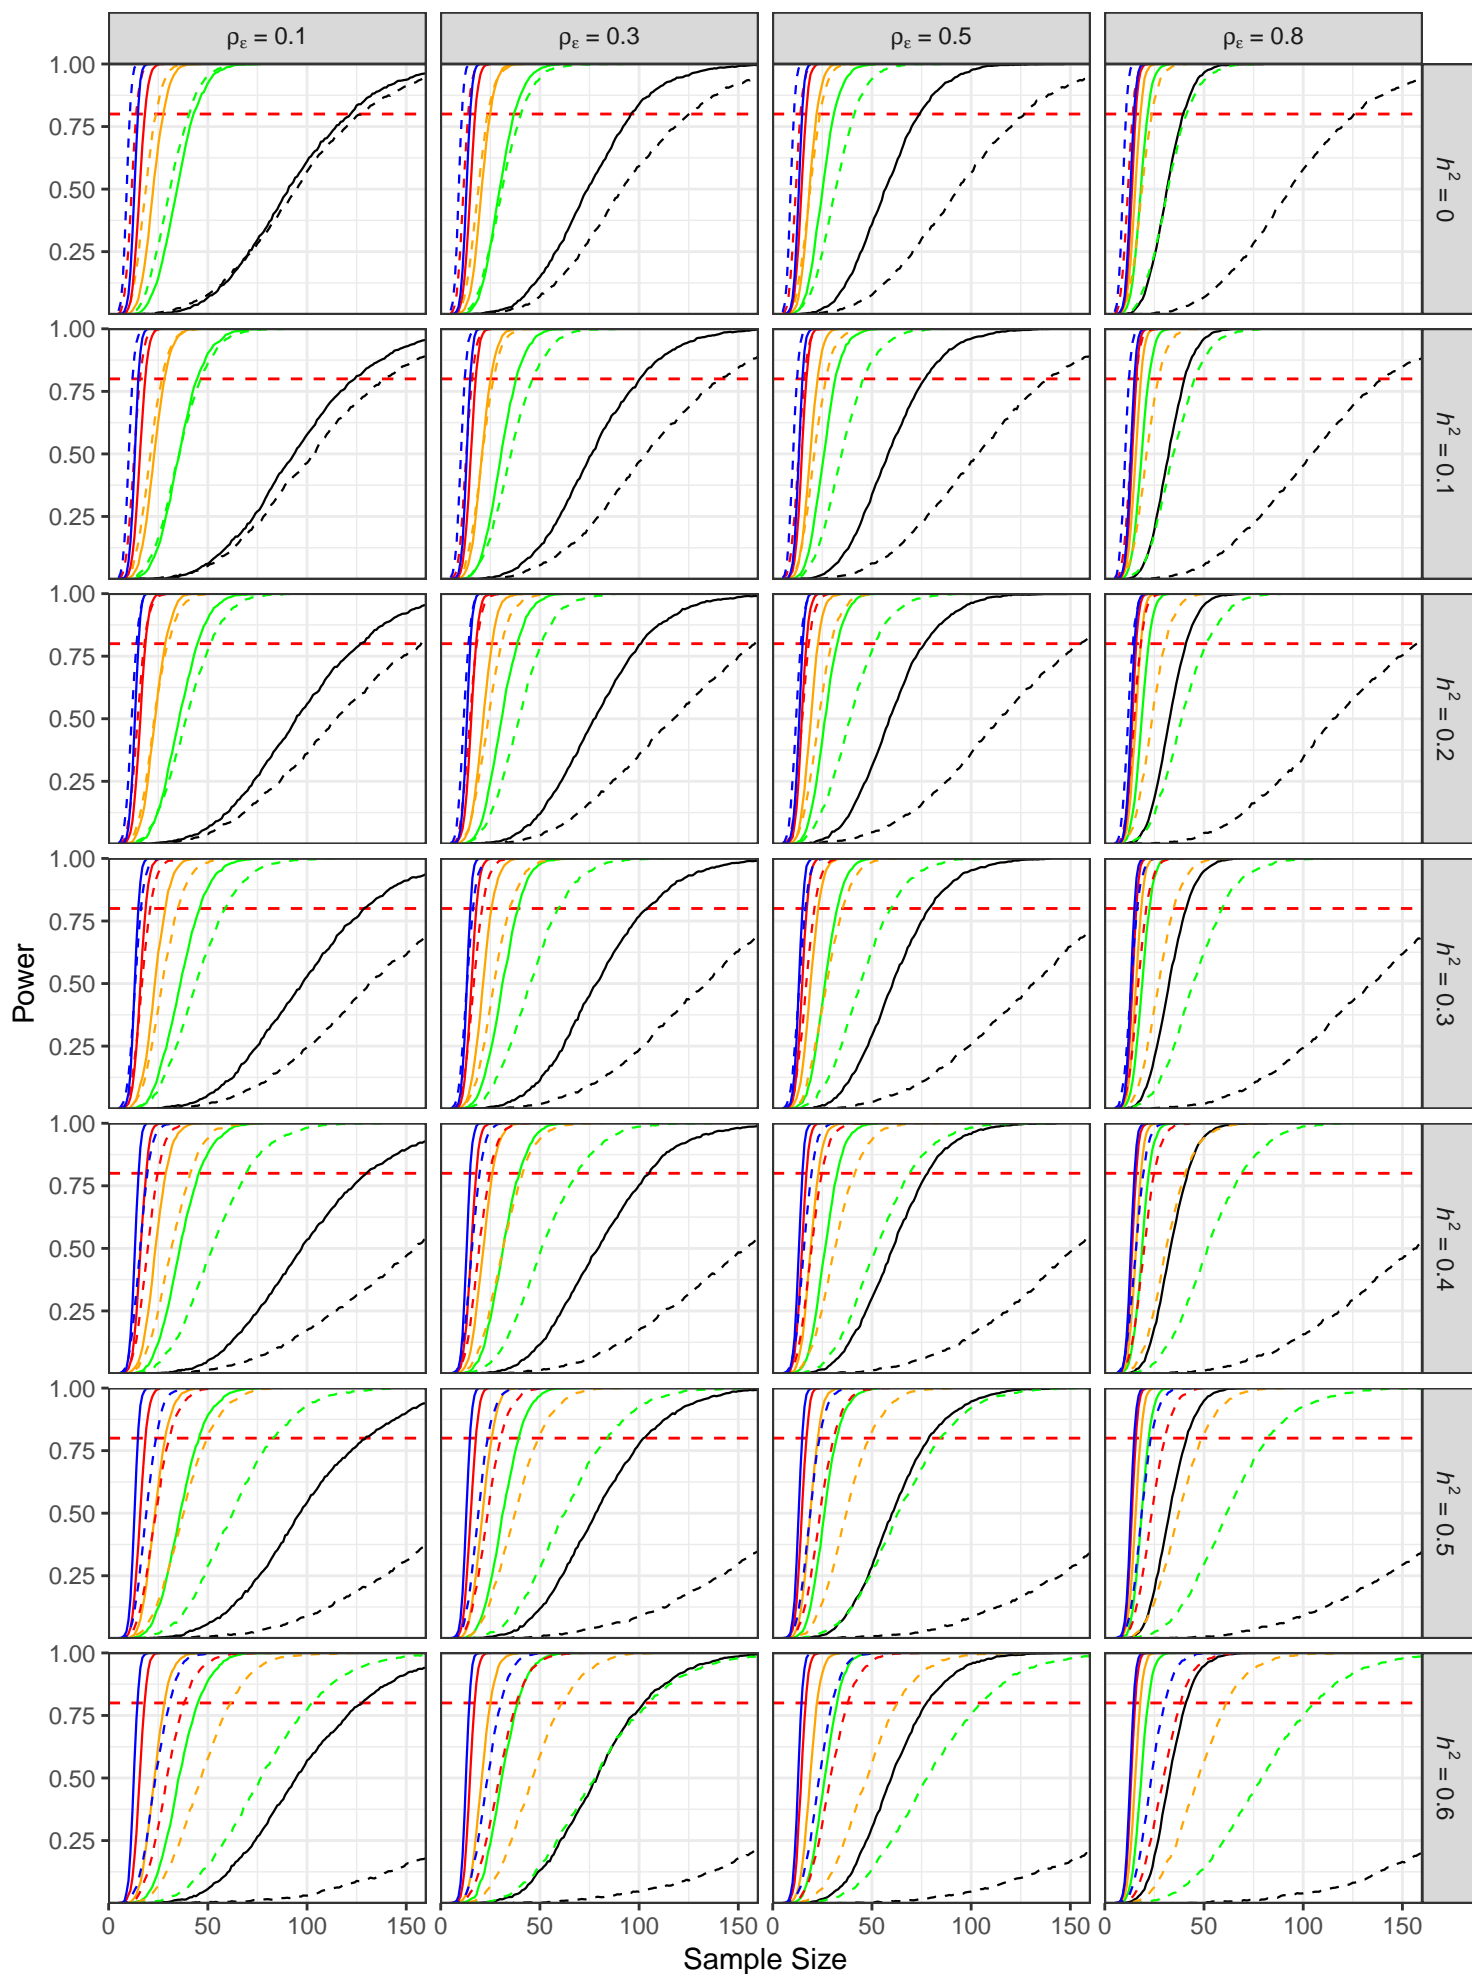

$P_K = 0.05$ ,  $E(M) = 3.36$ ,  $\text{Var}(M) = 0.06$

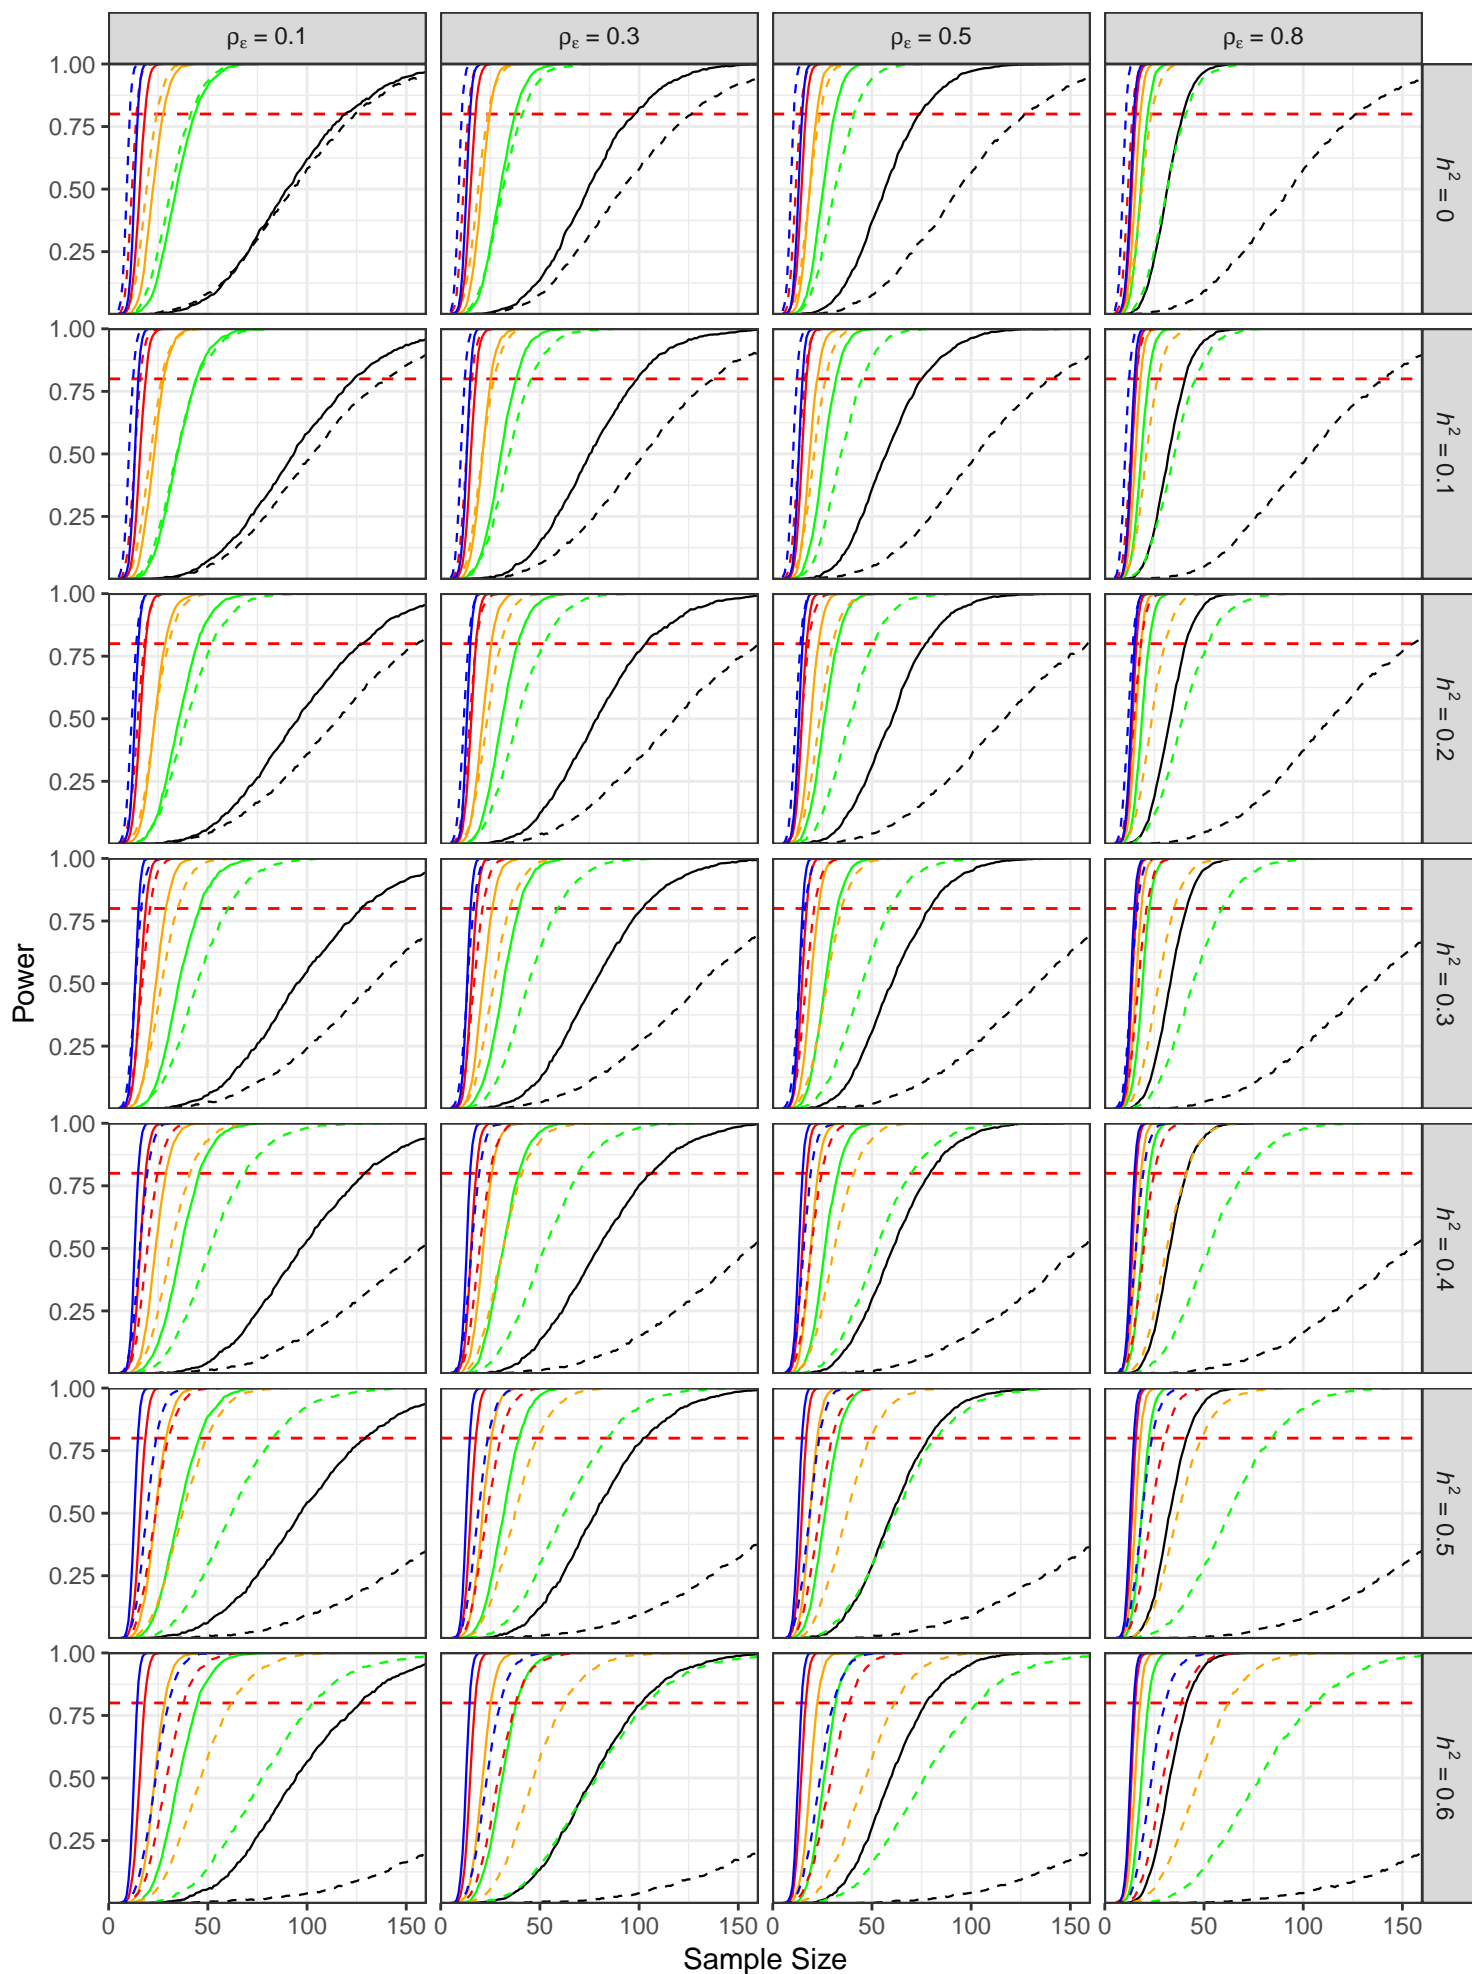

$P_K = 0.05$ ,  $E(M) = 3.36$ ,  $Var(M) = 1$

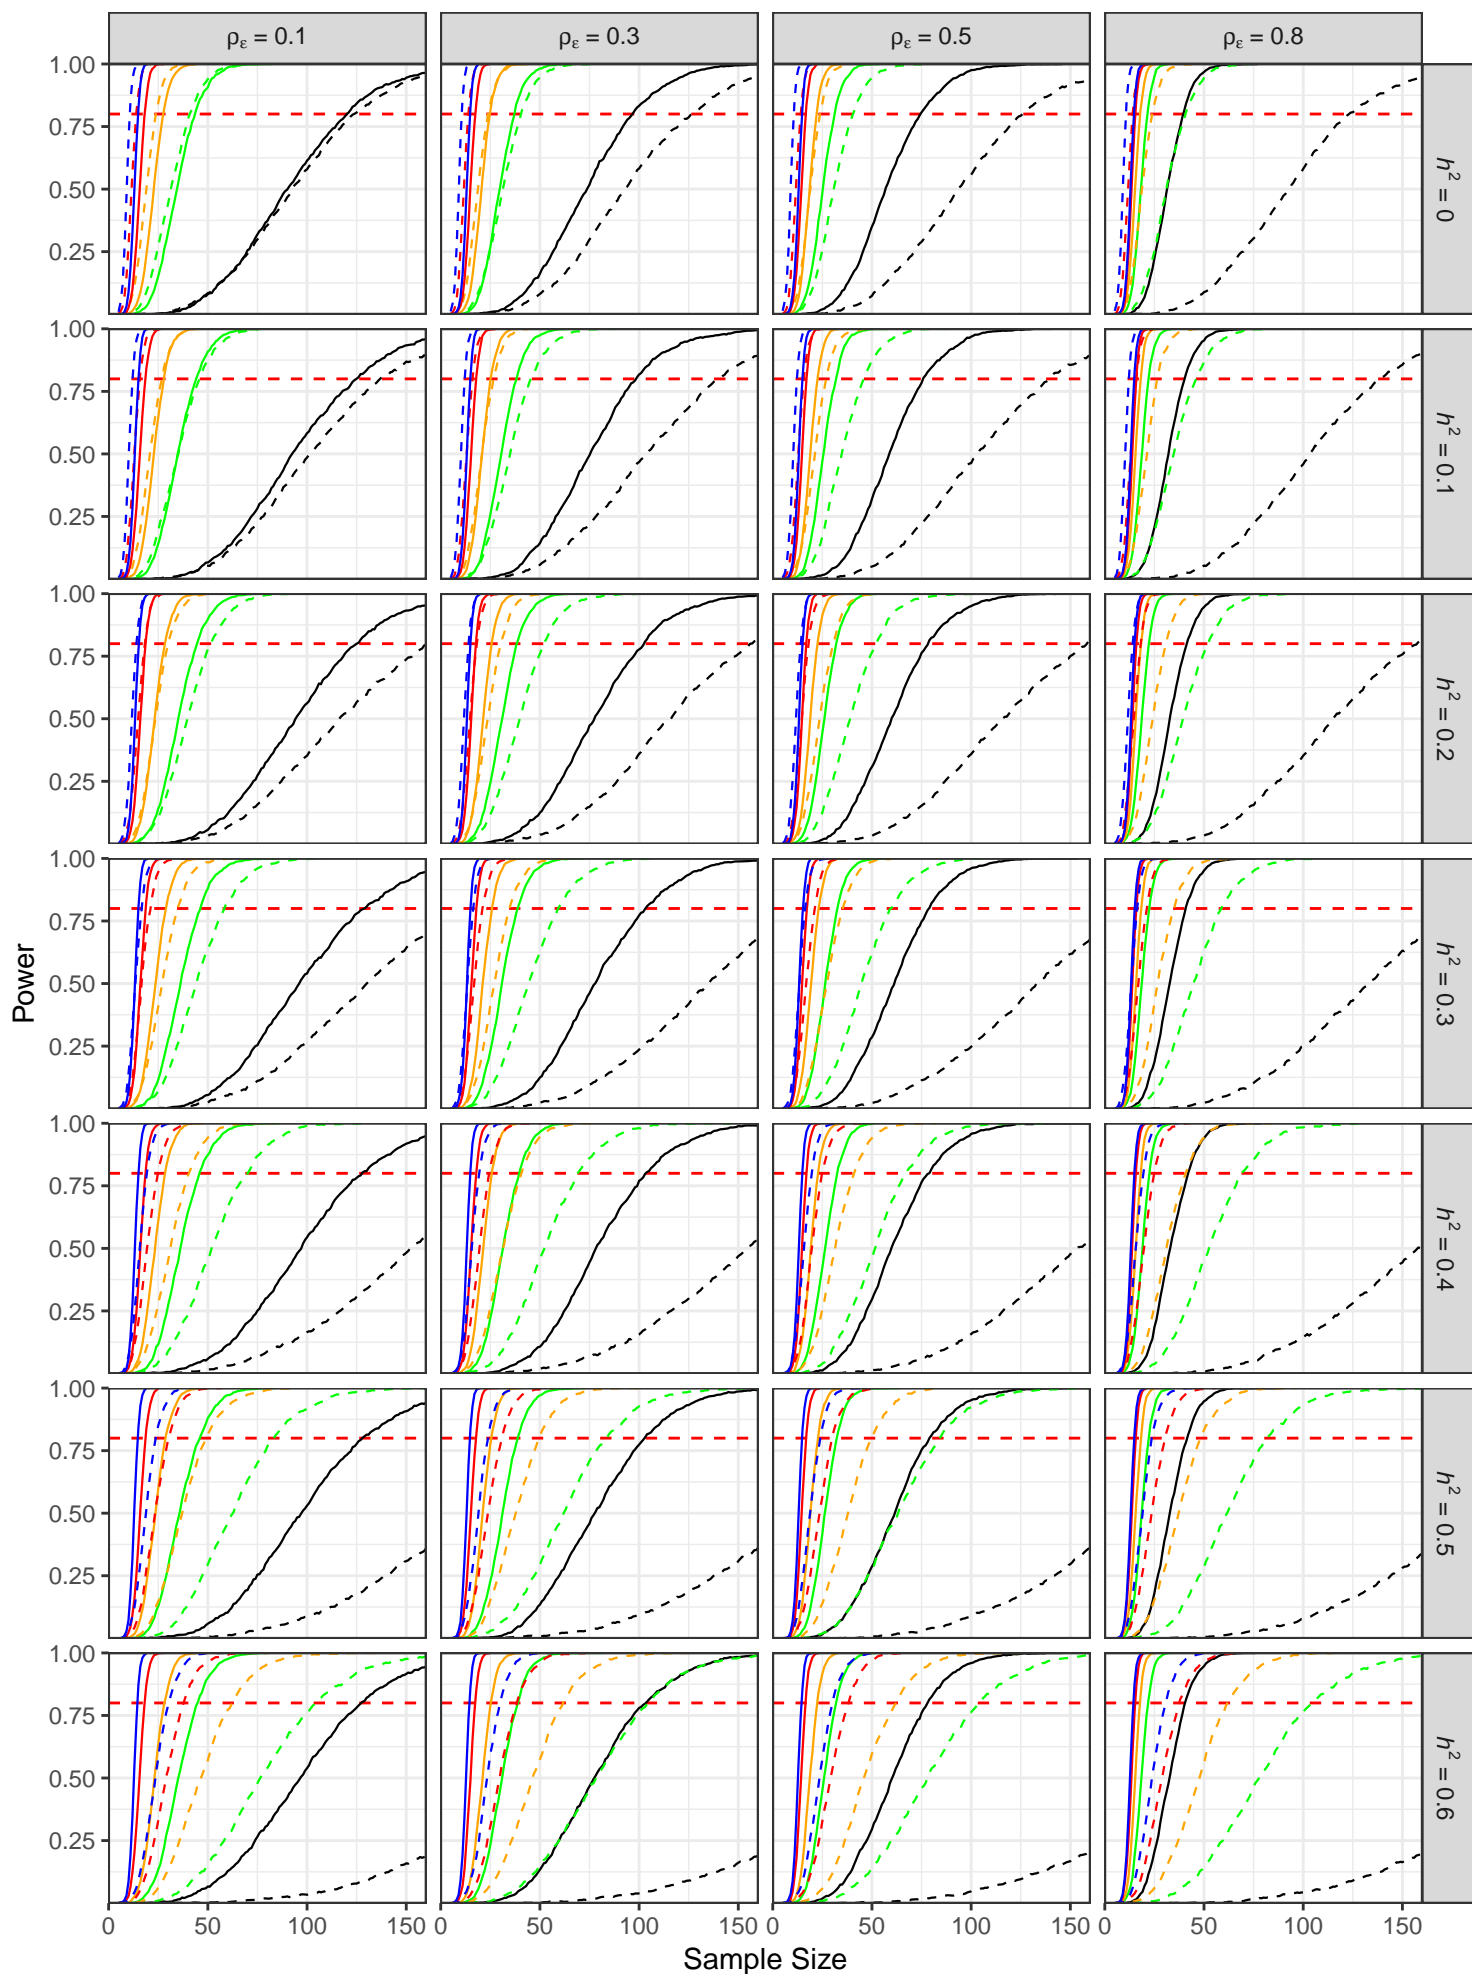

$P_K = 0.05$ ,  $E(M) = 3.36$ ,  $Var(M) = 2$

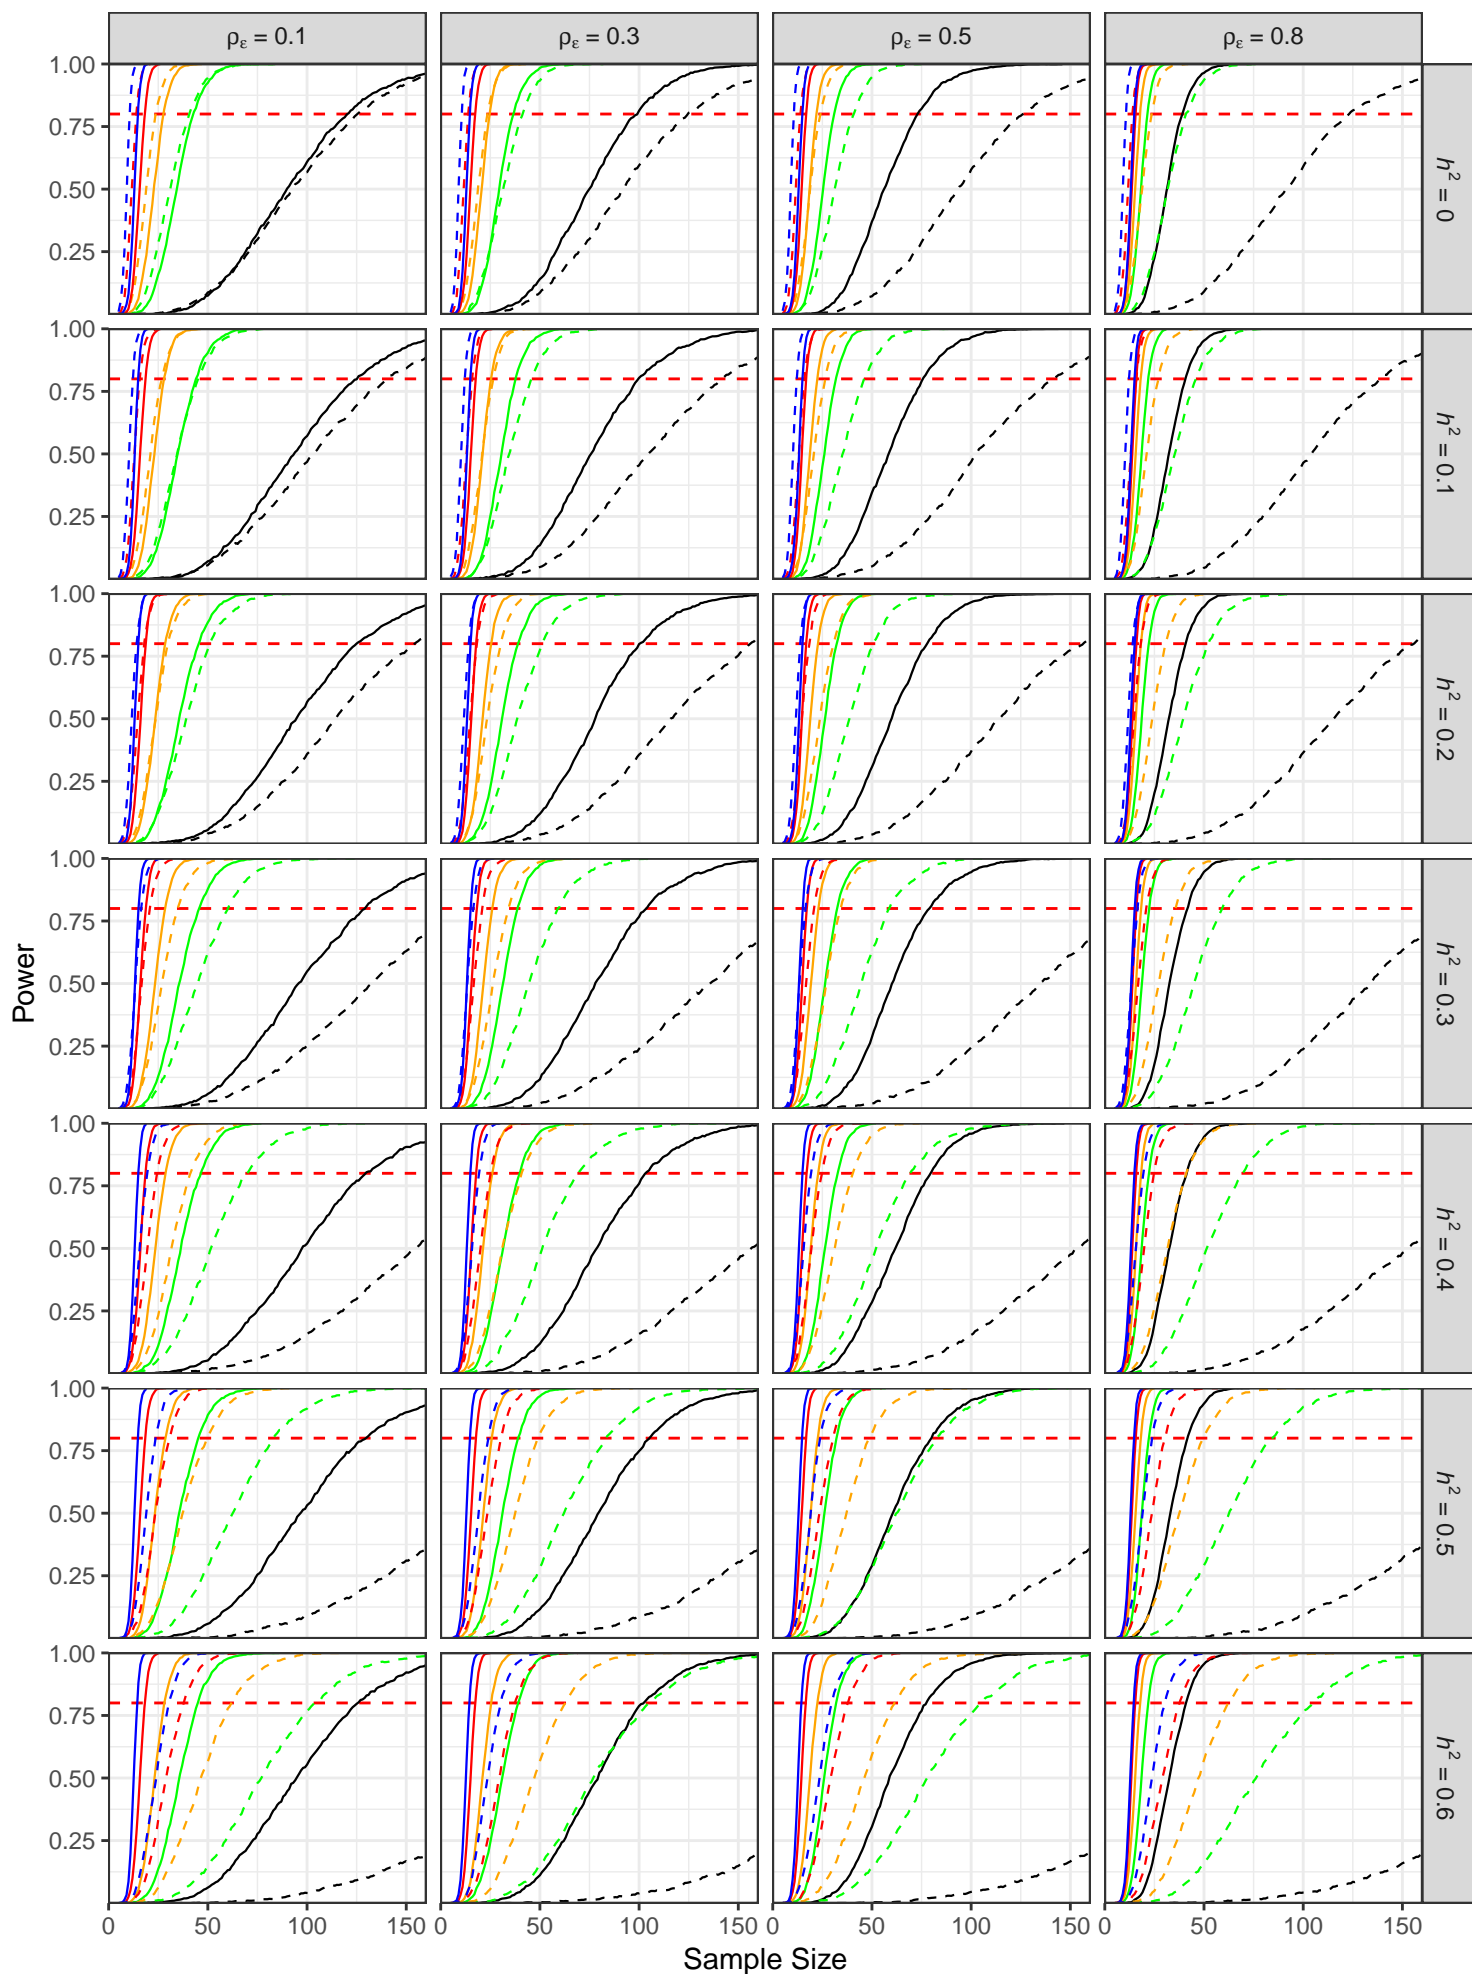



$P_K = 0.05$ ,  $E(M) = 3.36$ ,  $Var(M) = 3$

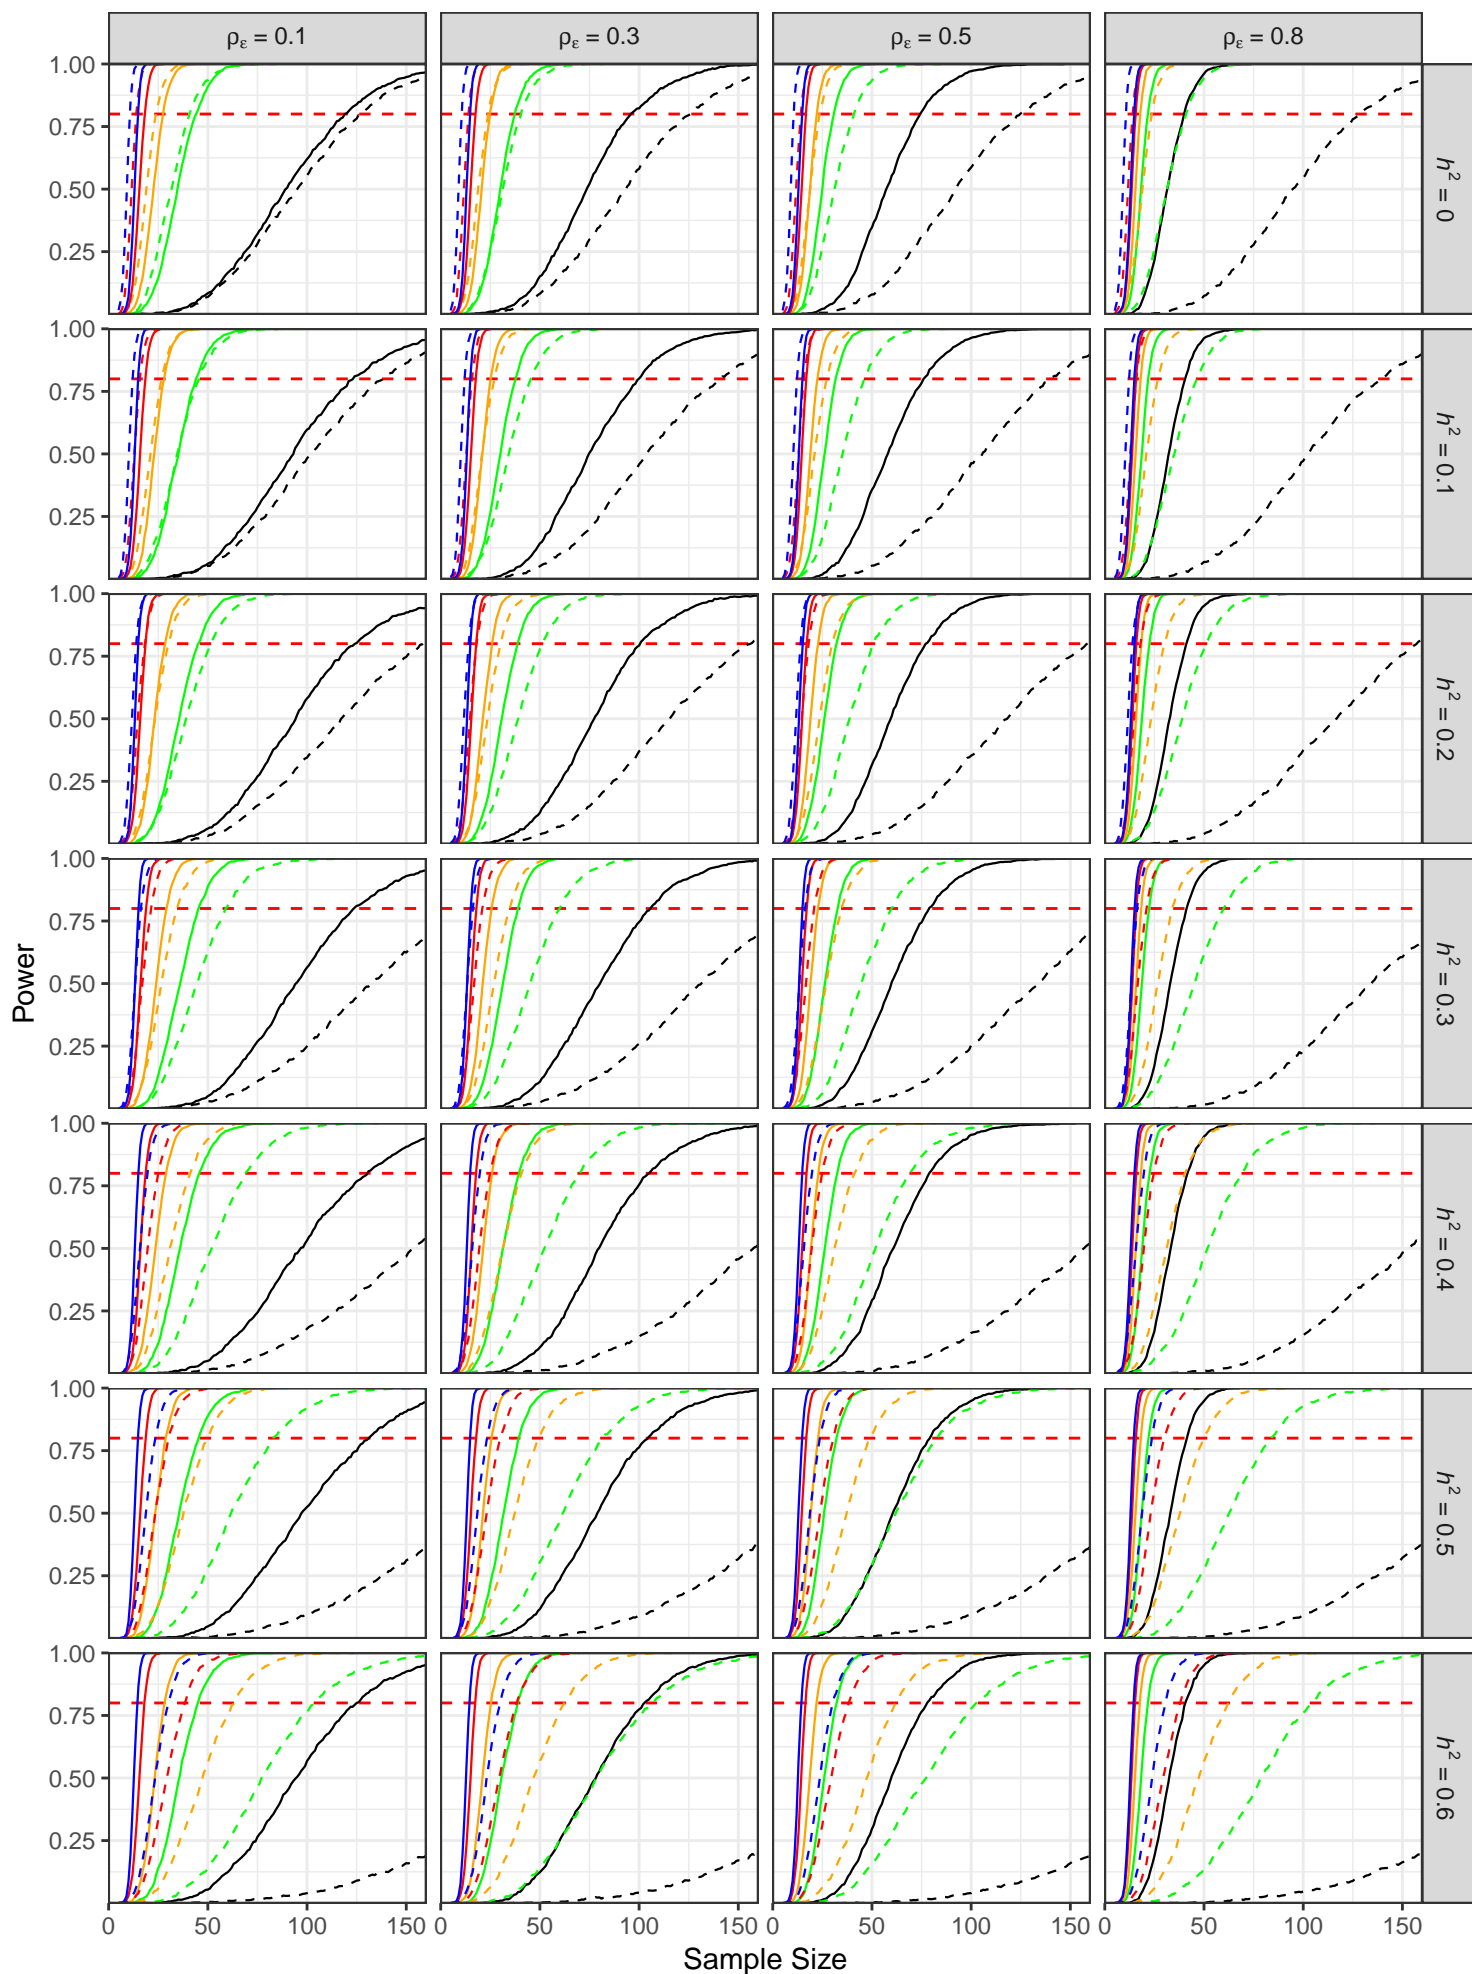

$P_K = 0.05$ ,  $E(M) = 3.36$ ,  $Var(M) = 4$

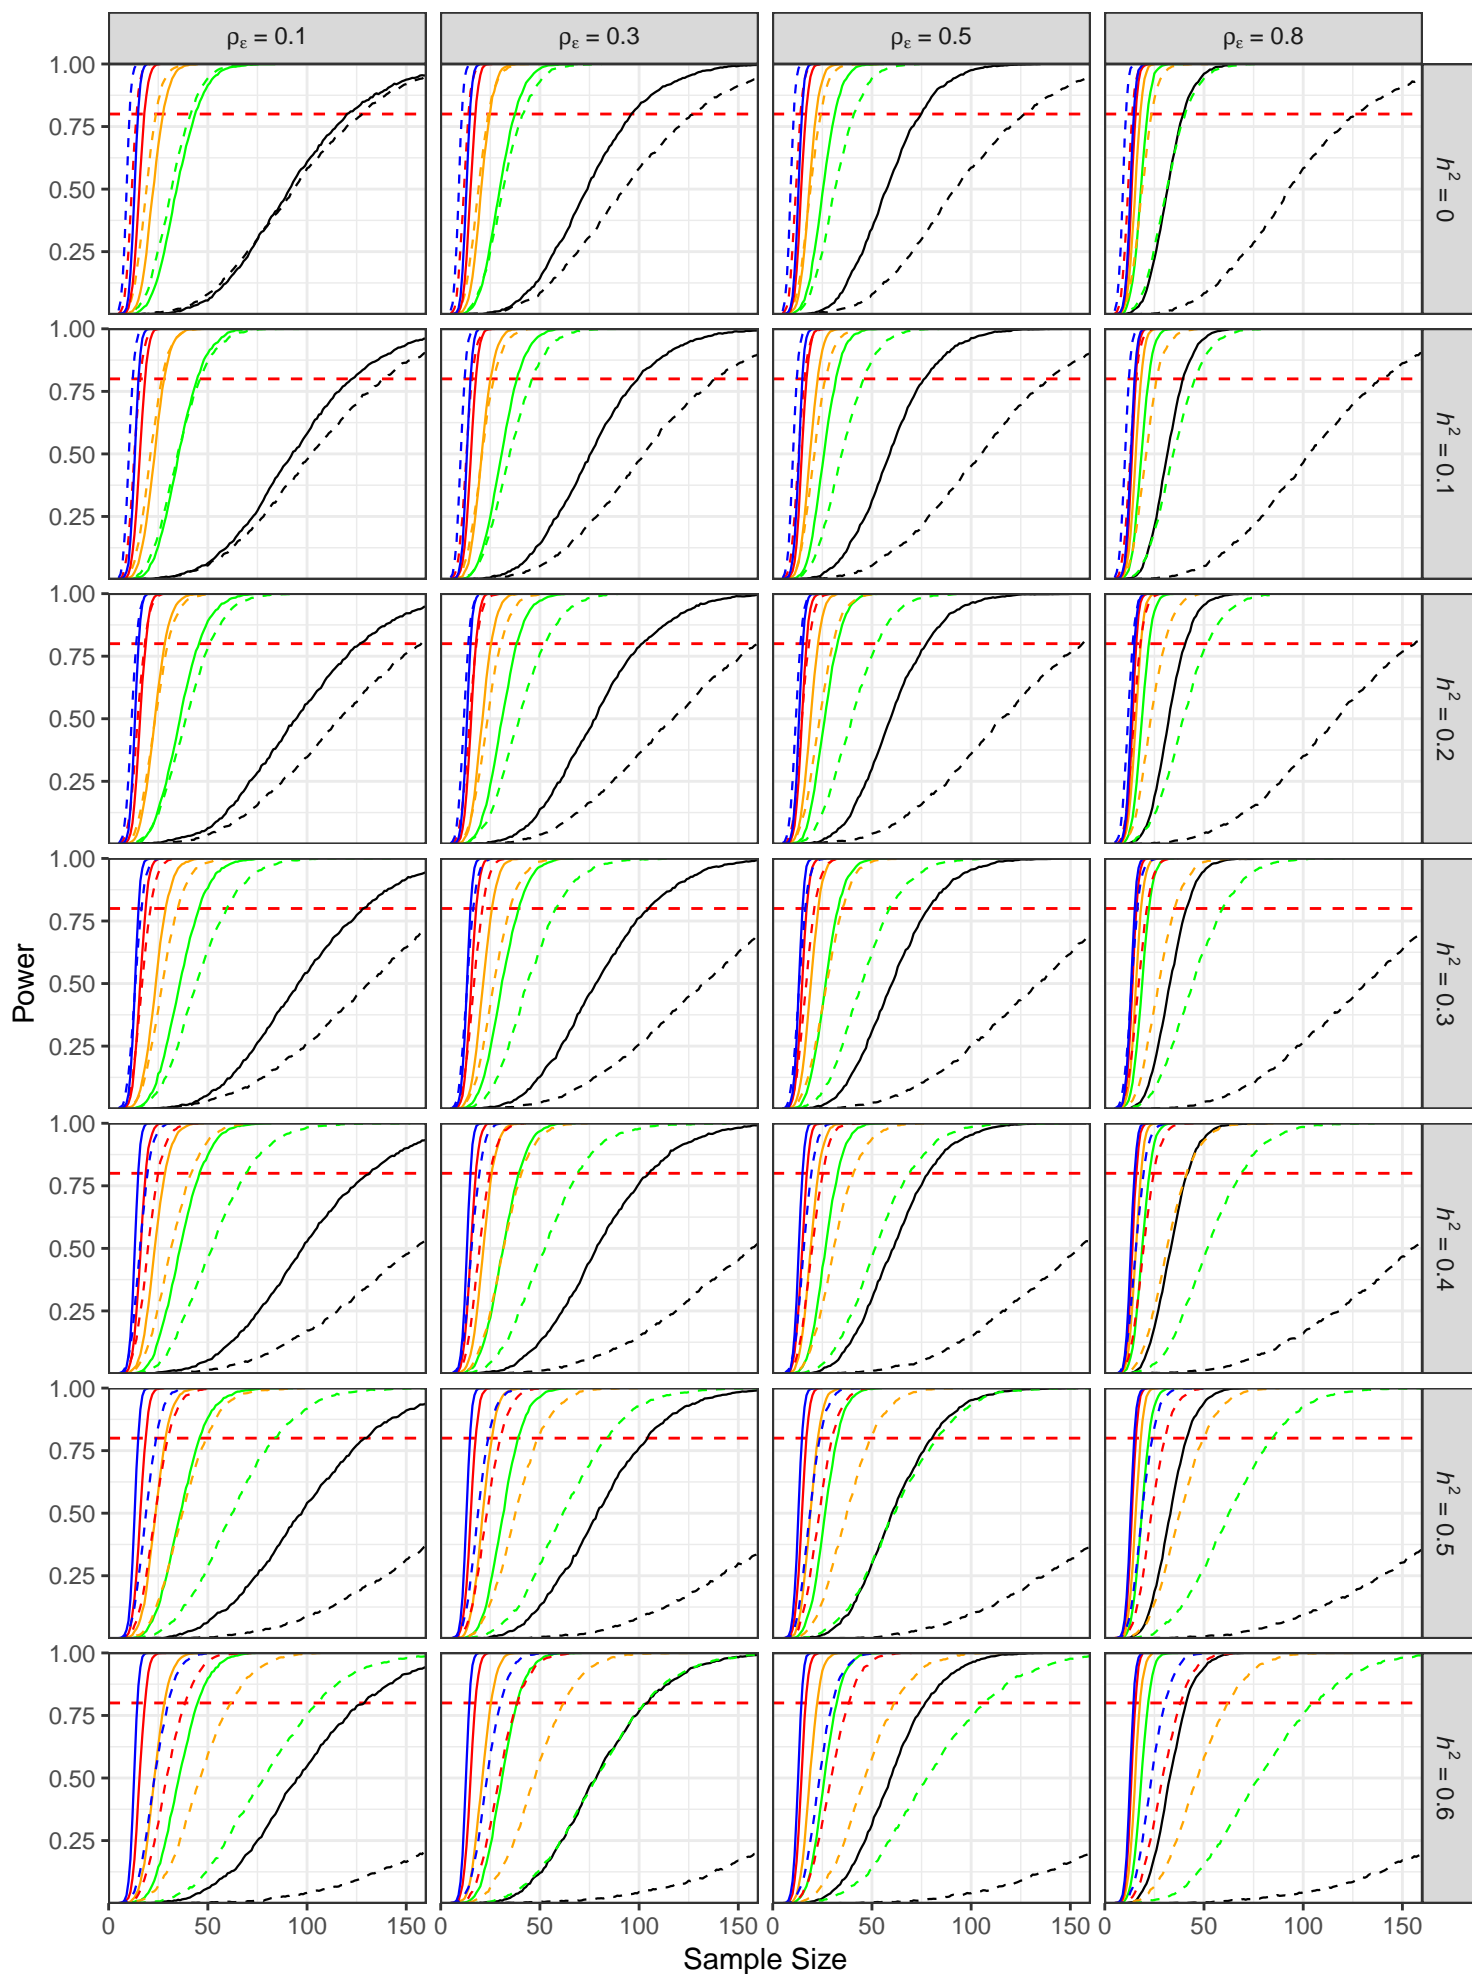

$P_K = 0.1$ ,  $E(M) = -3.78$ ,  $\text{Var}(M) = 0.06$

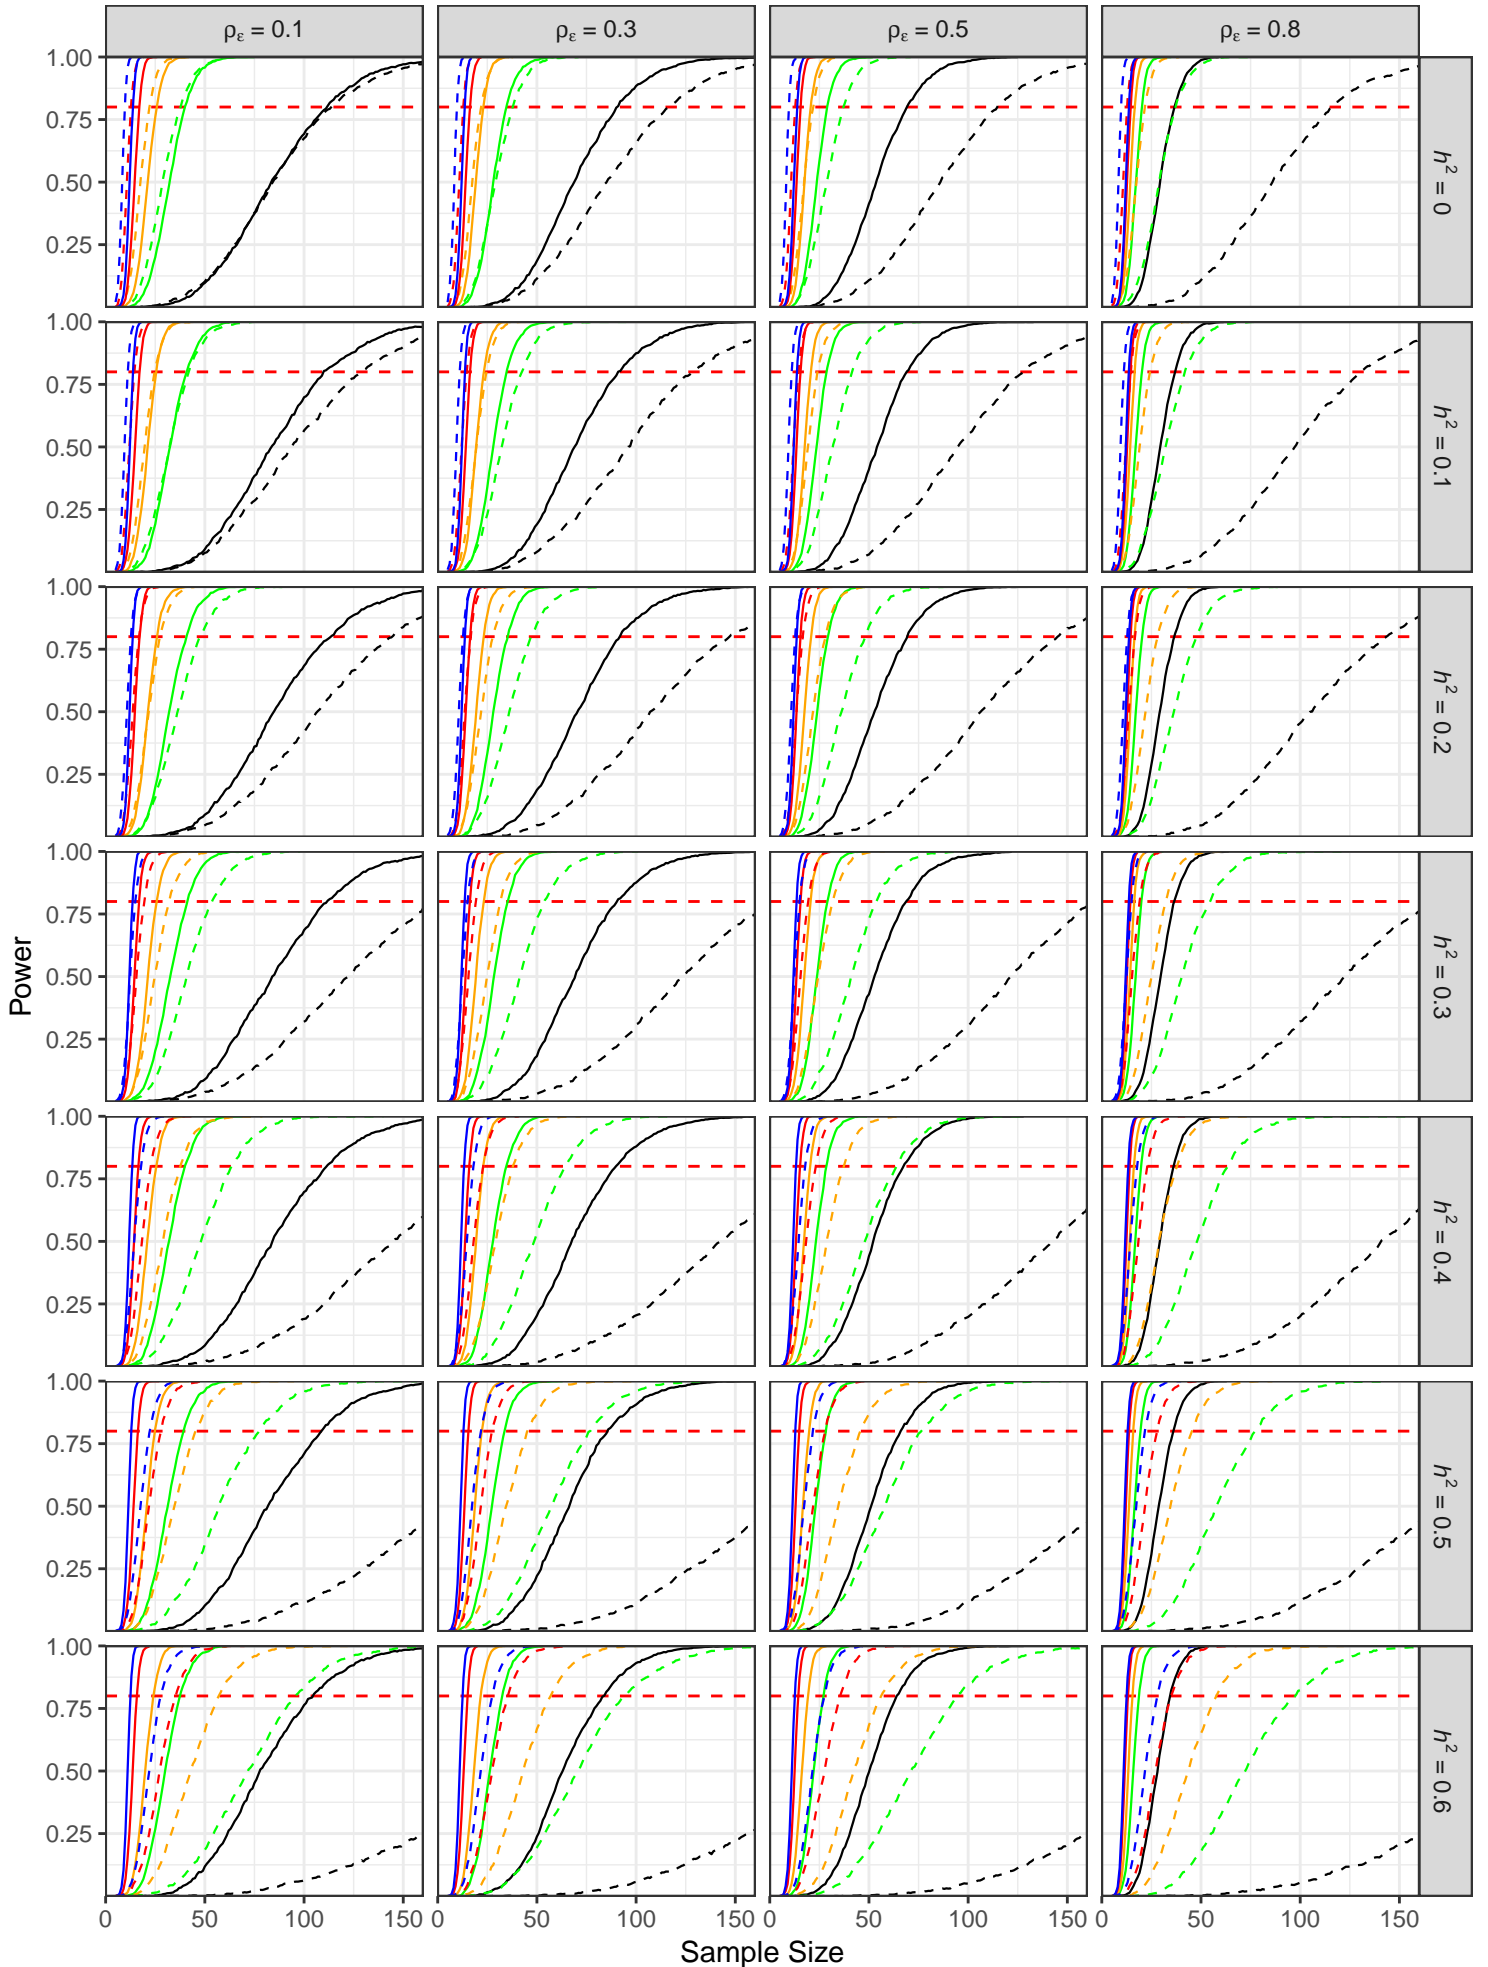

$P_K = 0.1$ ,  $E(M) = -3.78$ ,  $\text{Var}(M) = 1$

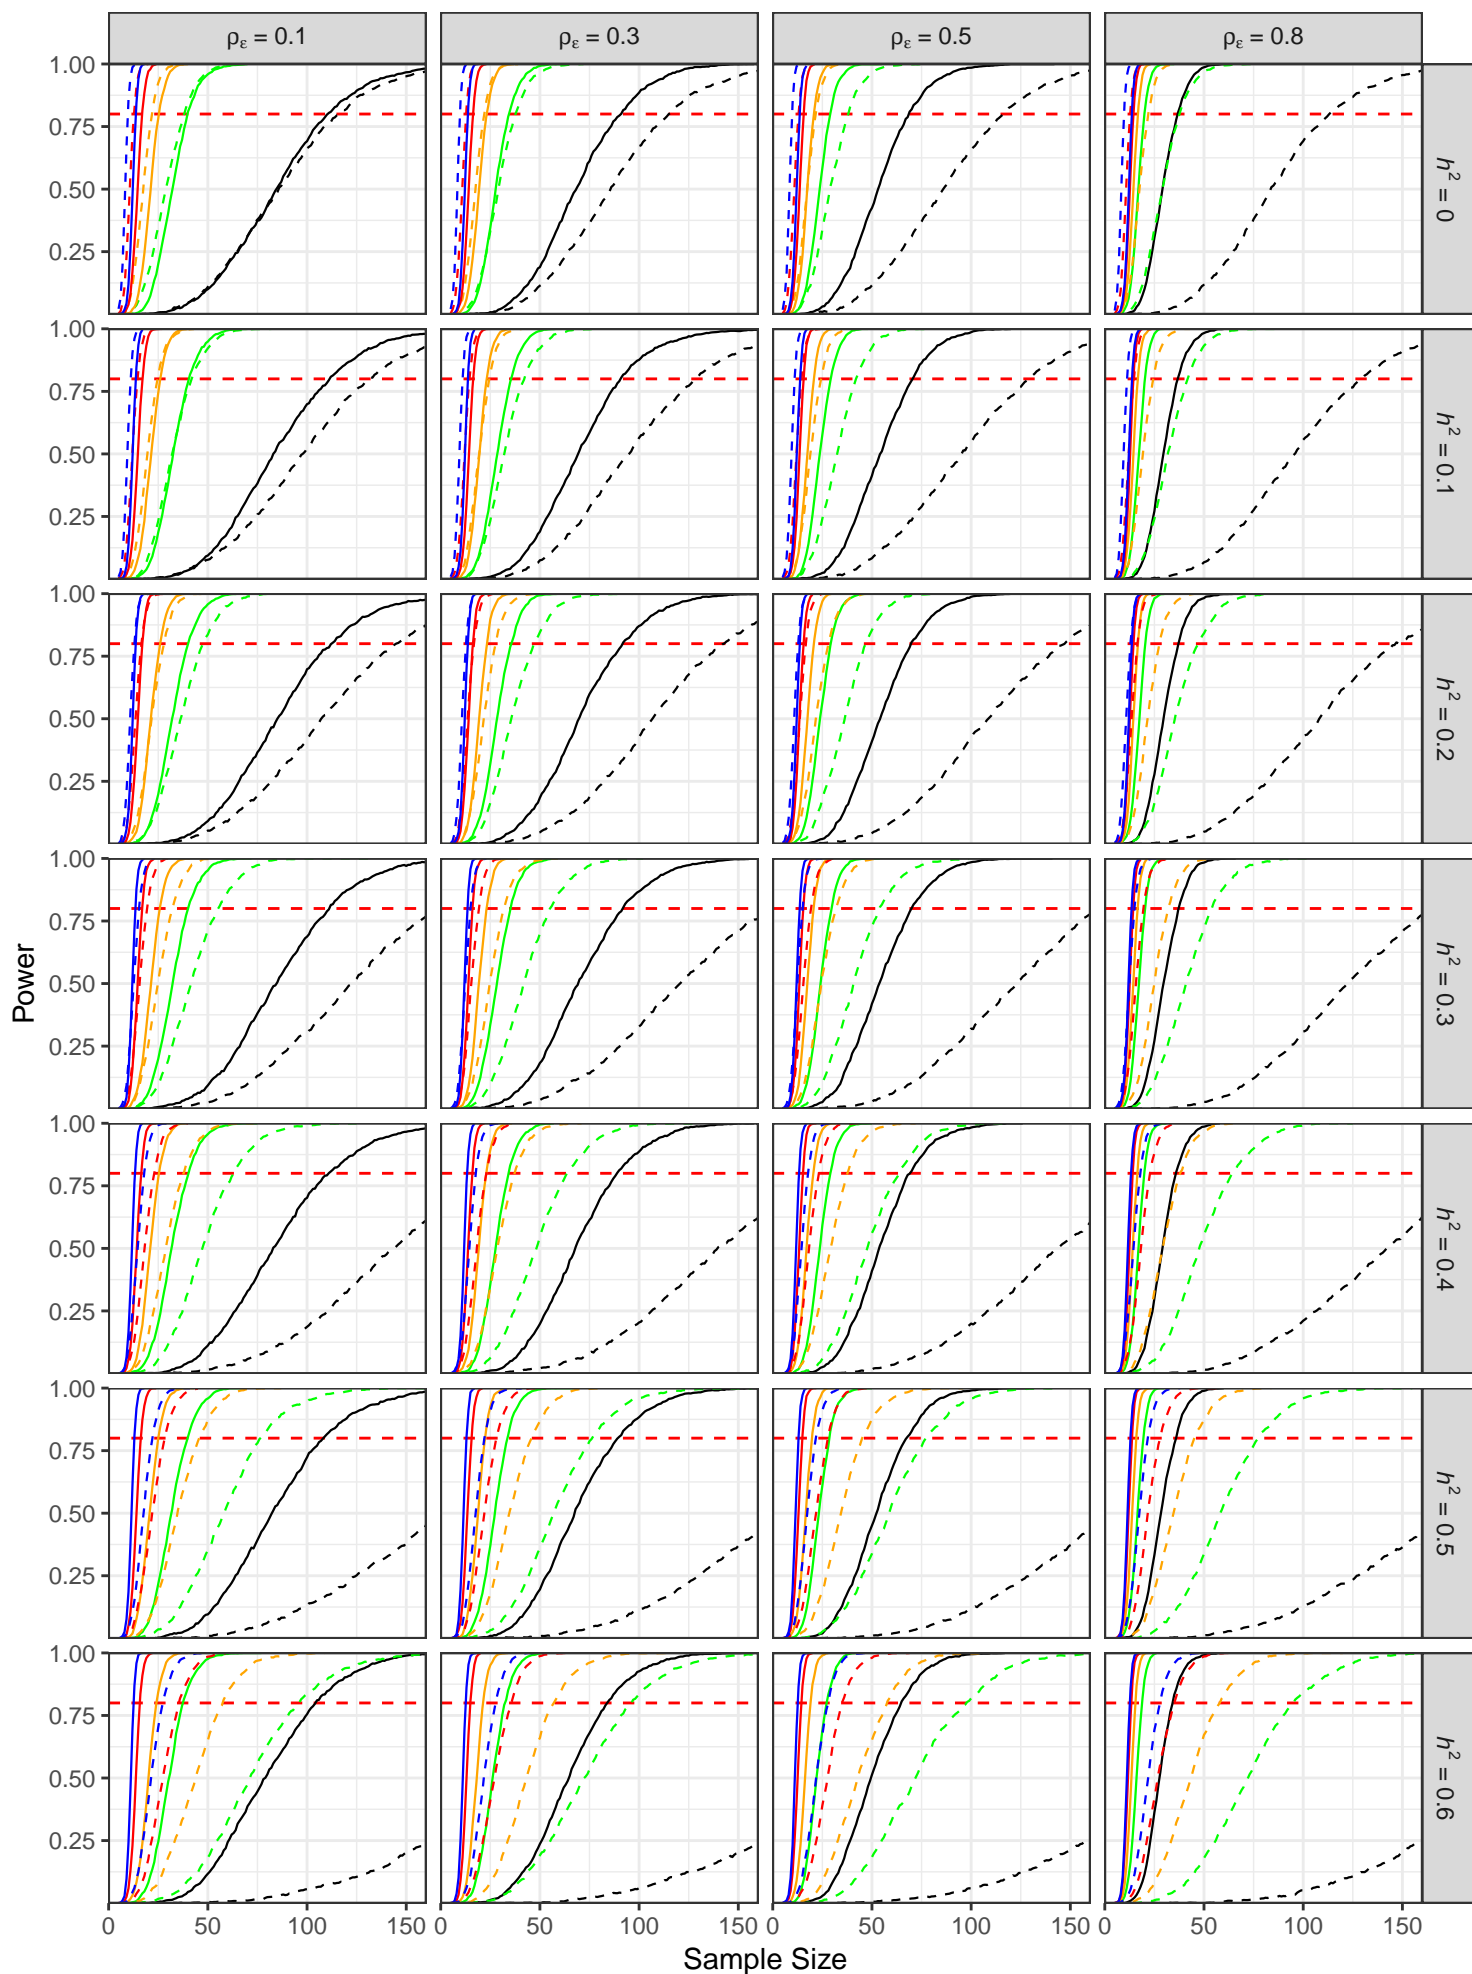

$P_K = 0.1$ ,  $E(M) = -3.78$ ,  $\text{Var}(M) = 2$

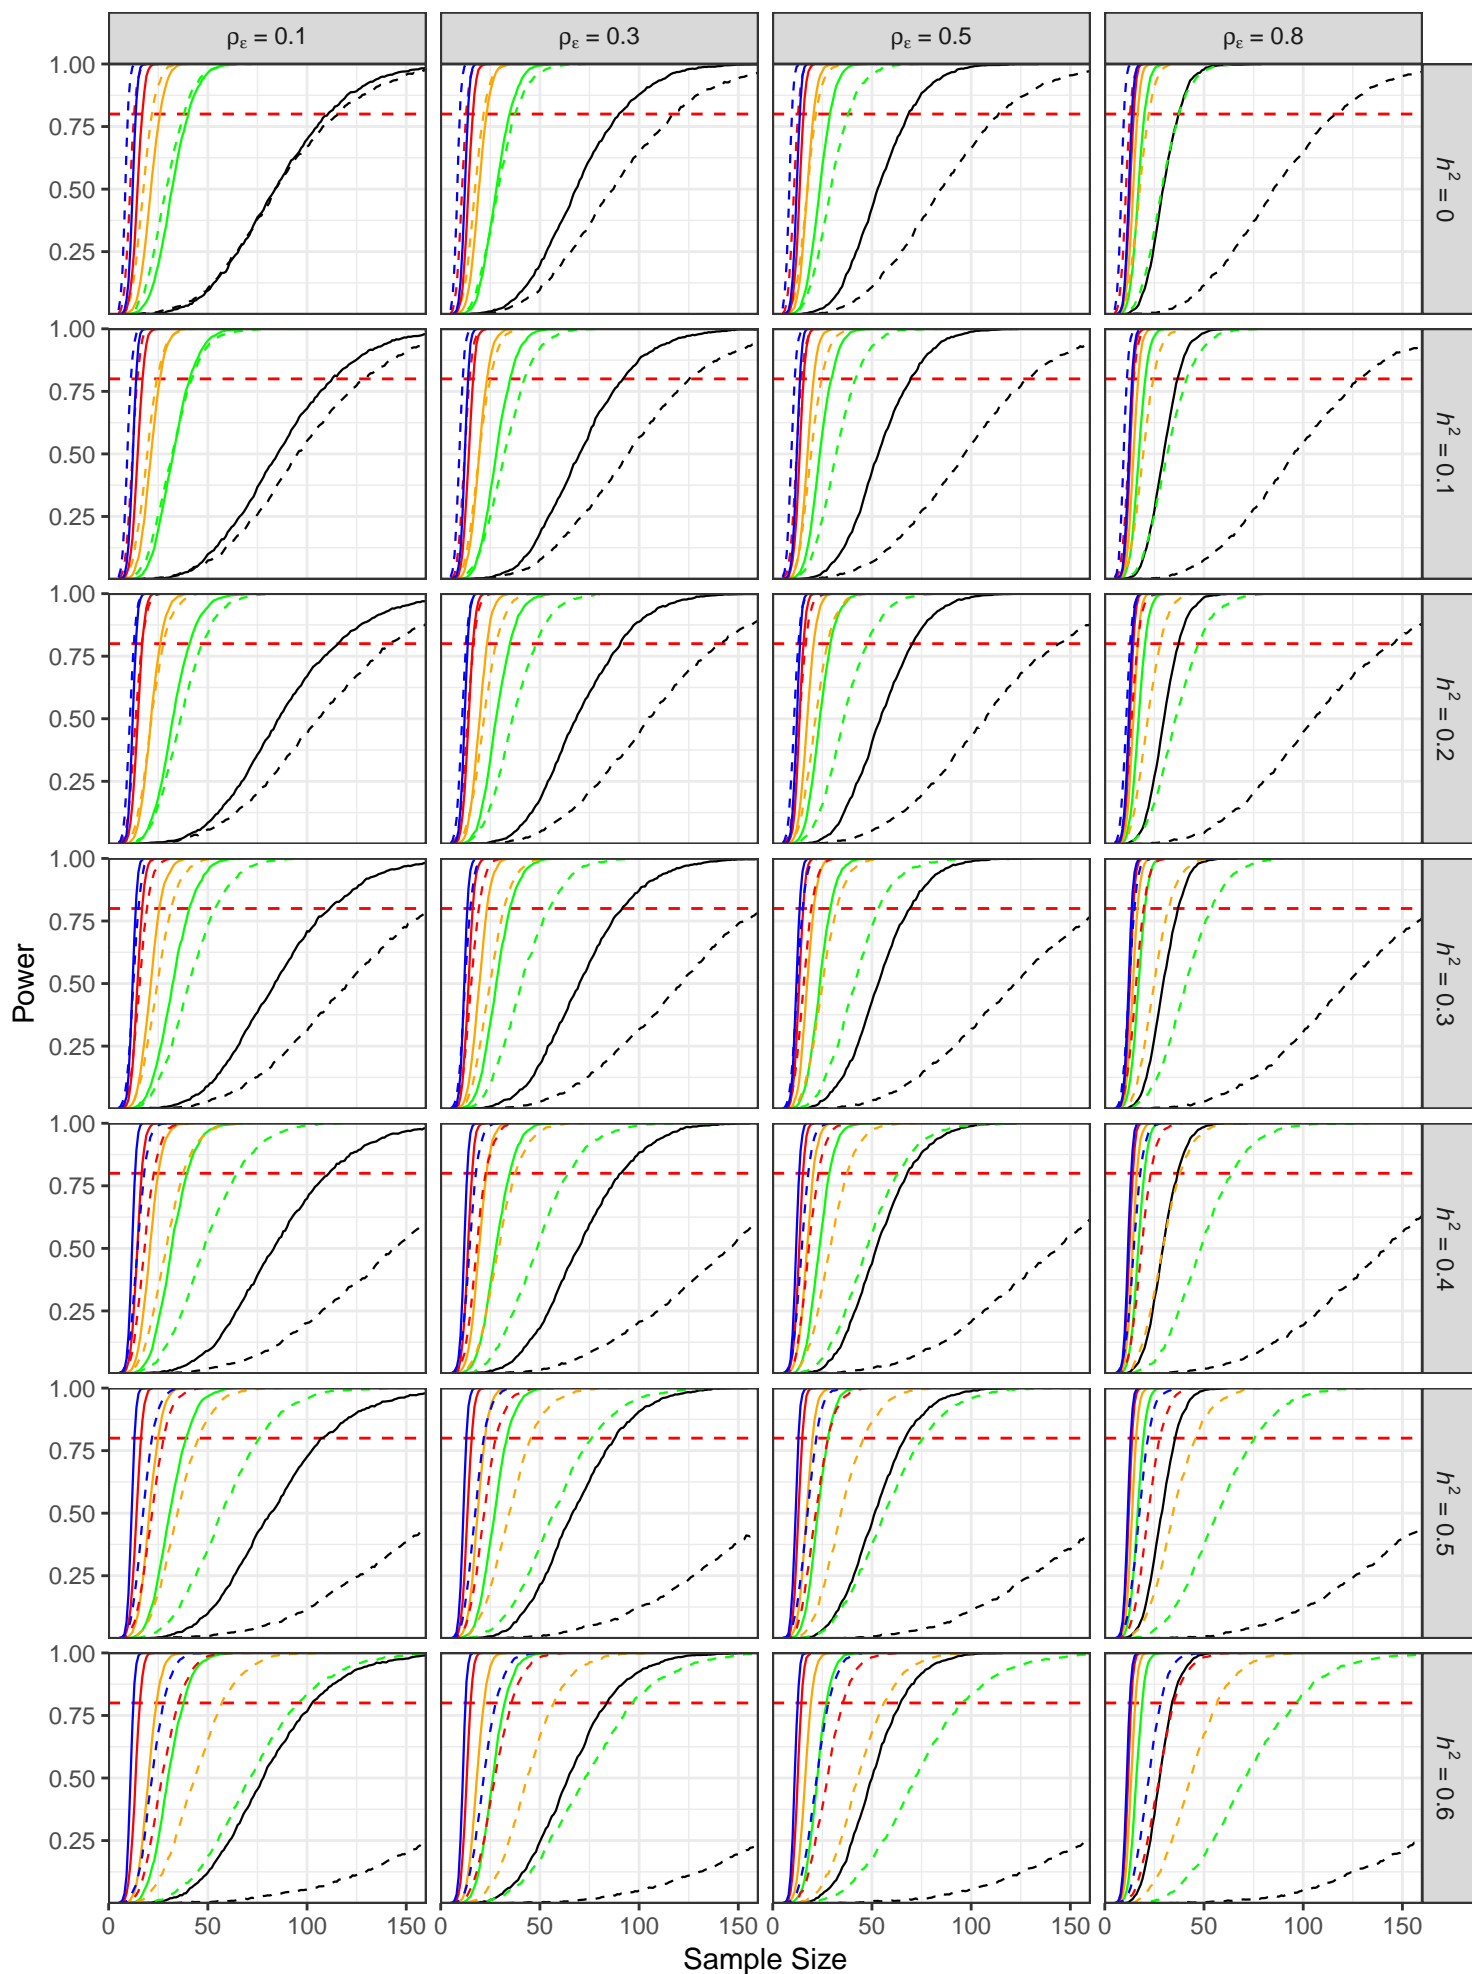



$P_K = 0.1$ ,  $E(M) = -3.78$ ,  $\text{Var}(M) = 3$

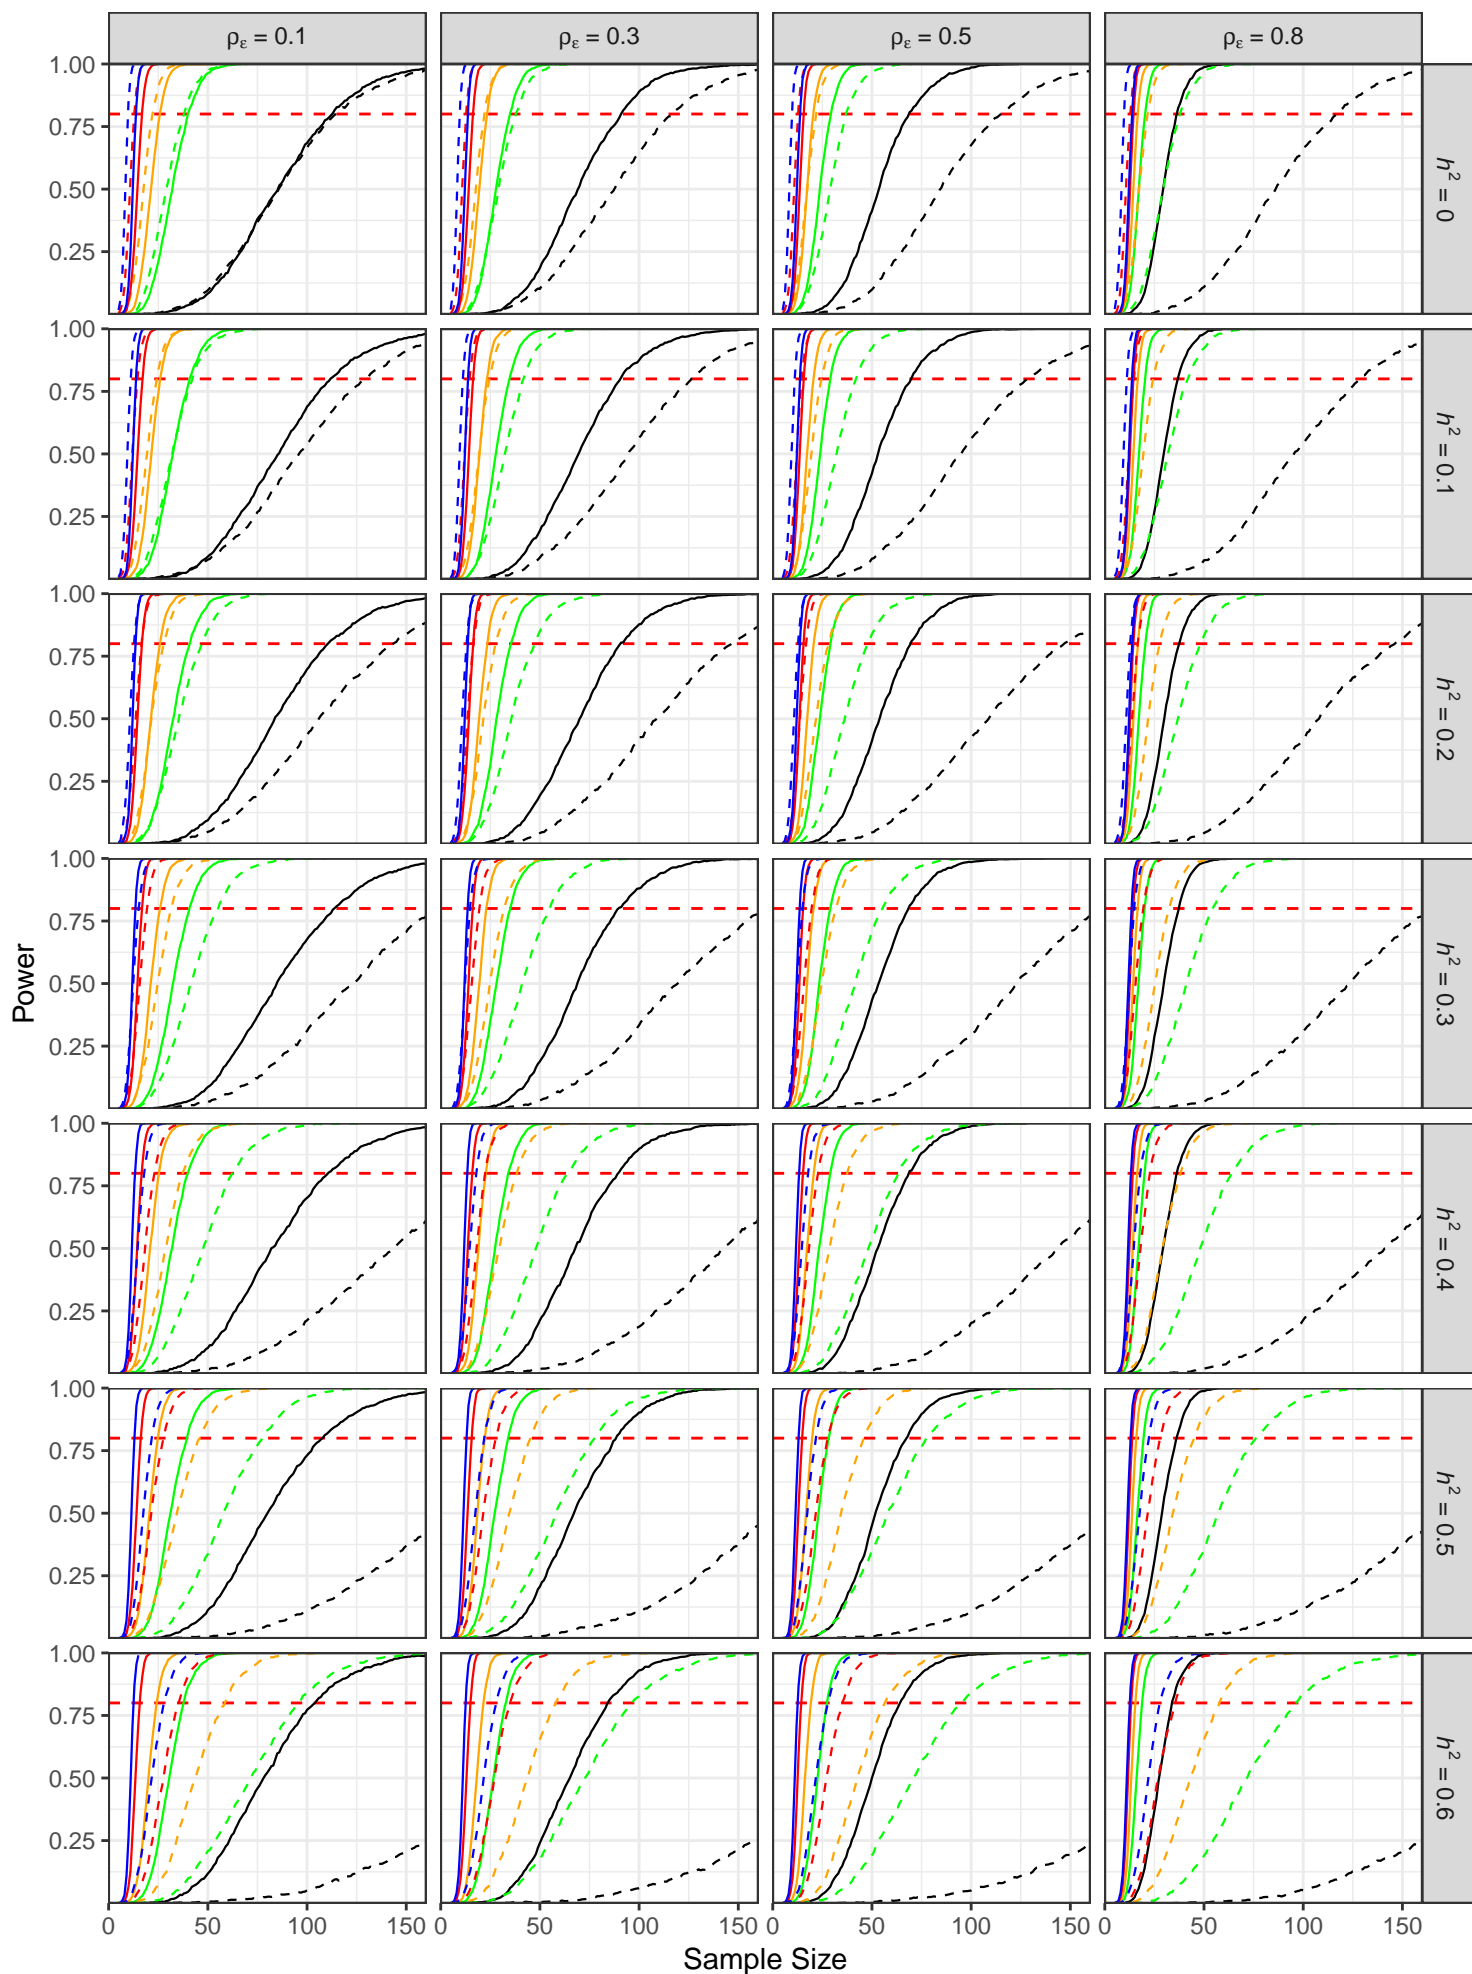

$R^2_{M,E}$  — 0.1 — 0.3 — 0.5 — 0.8 — 1

Design - - Ordinary Case-control — Discordant Twin

$P_K = 0.1$ ,  $E(M) = -3.78$ ,  $\text{Var}(M) = 4$

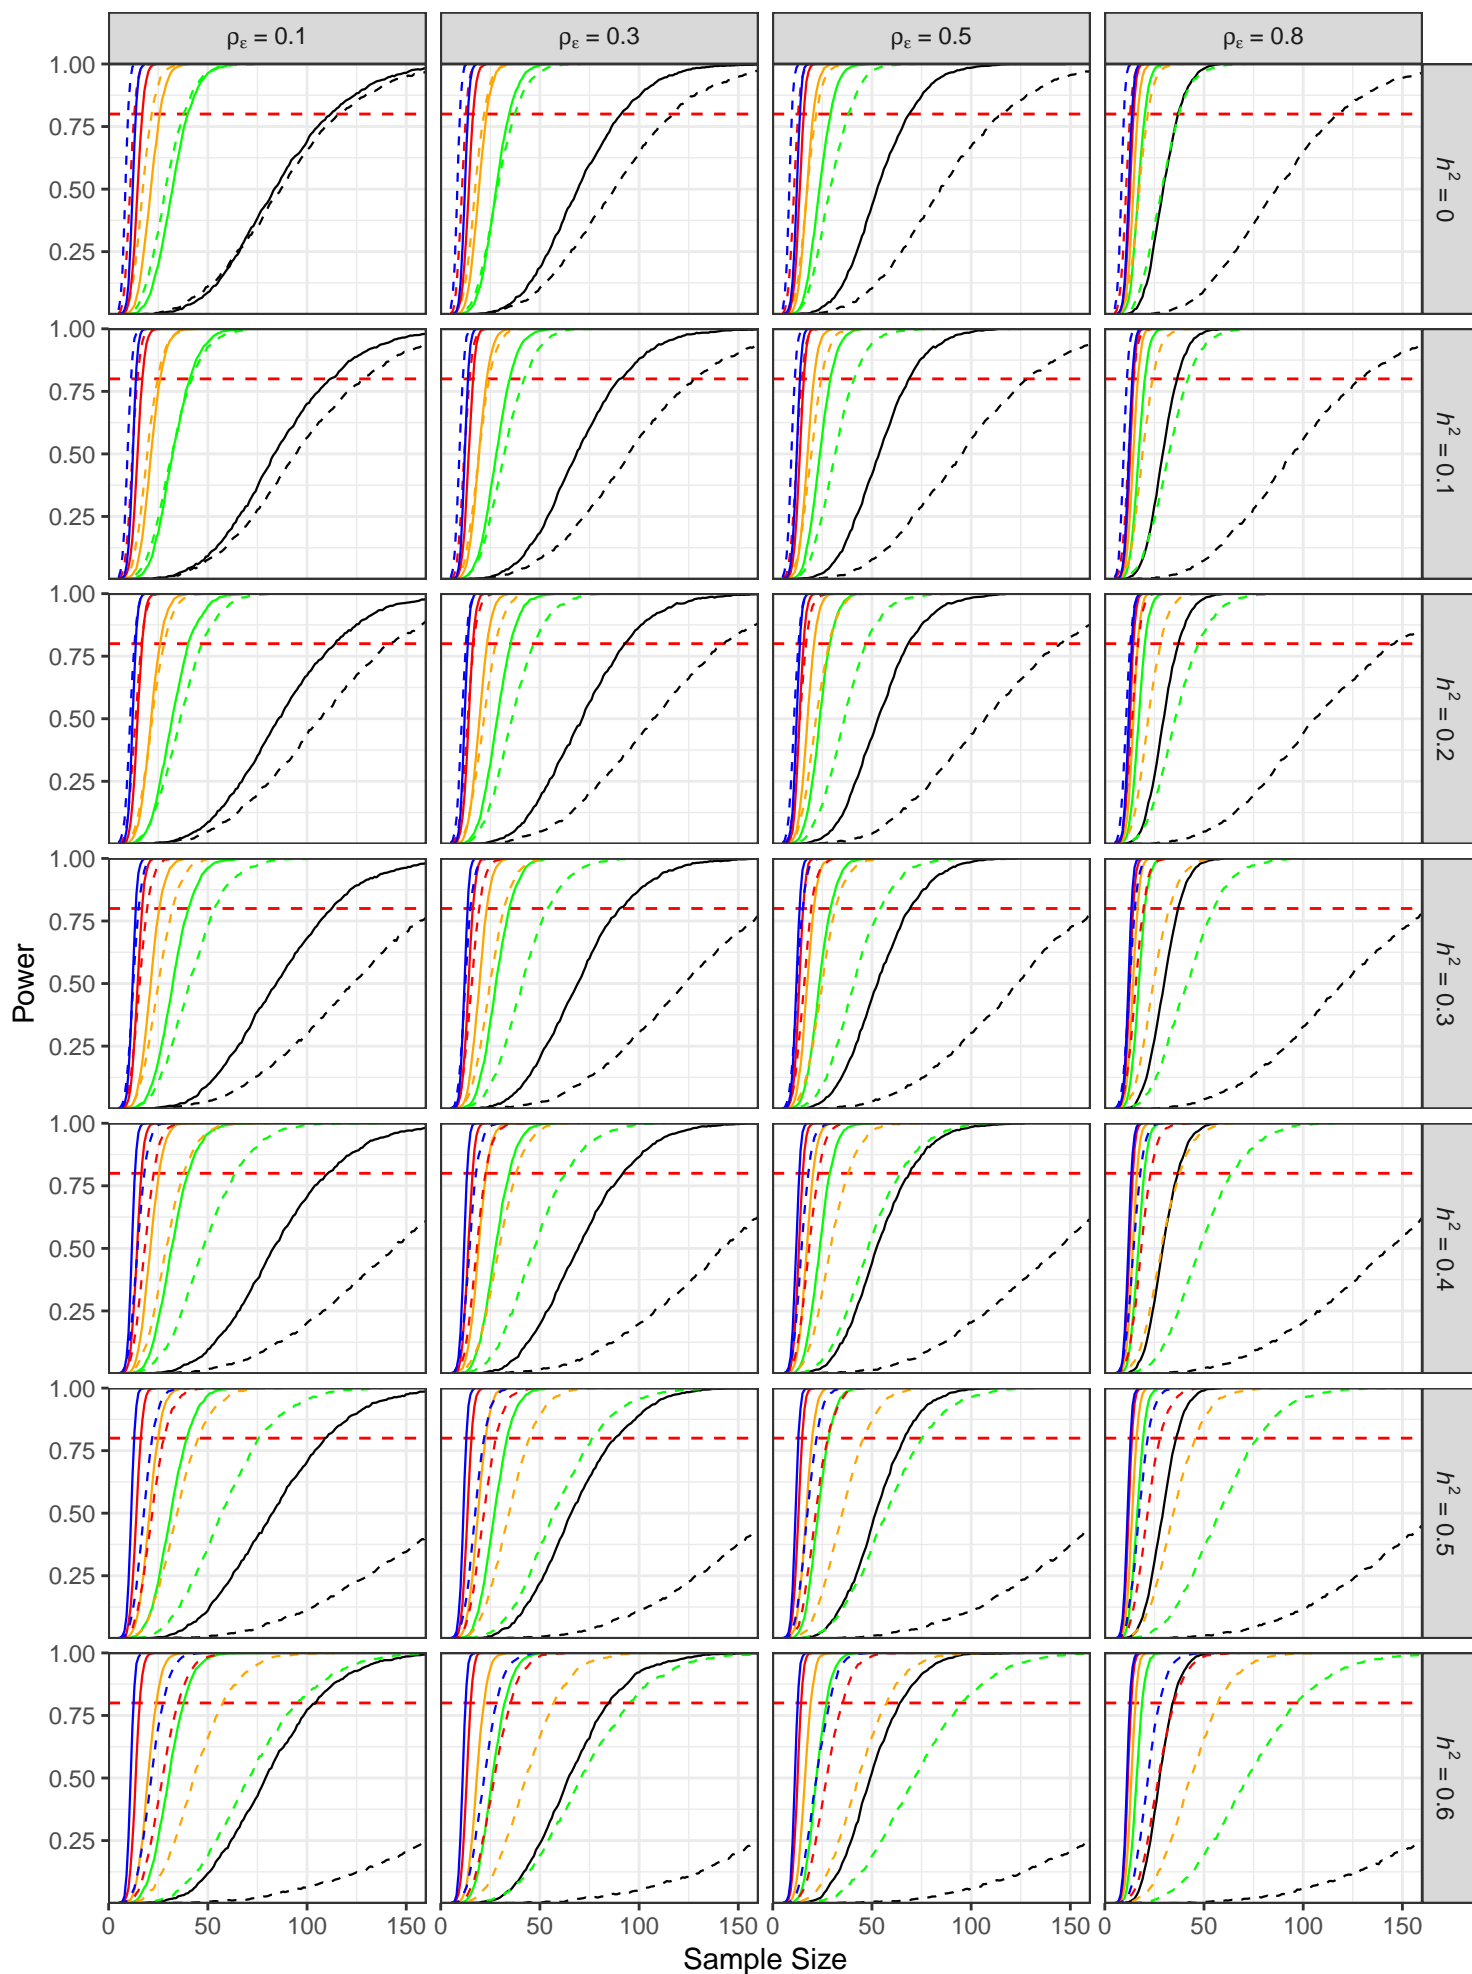

$R^2_{M,E}$  — 0.1 — 0.3 — 0.5 — 0.8 — 1

Design - - Ordinary Case-control — Discordant Twin

$P_K = 0.1$  ,  $E(M) = 3.36$  ,  $Var(M) = 0.06$

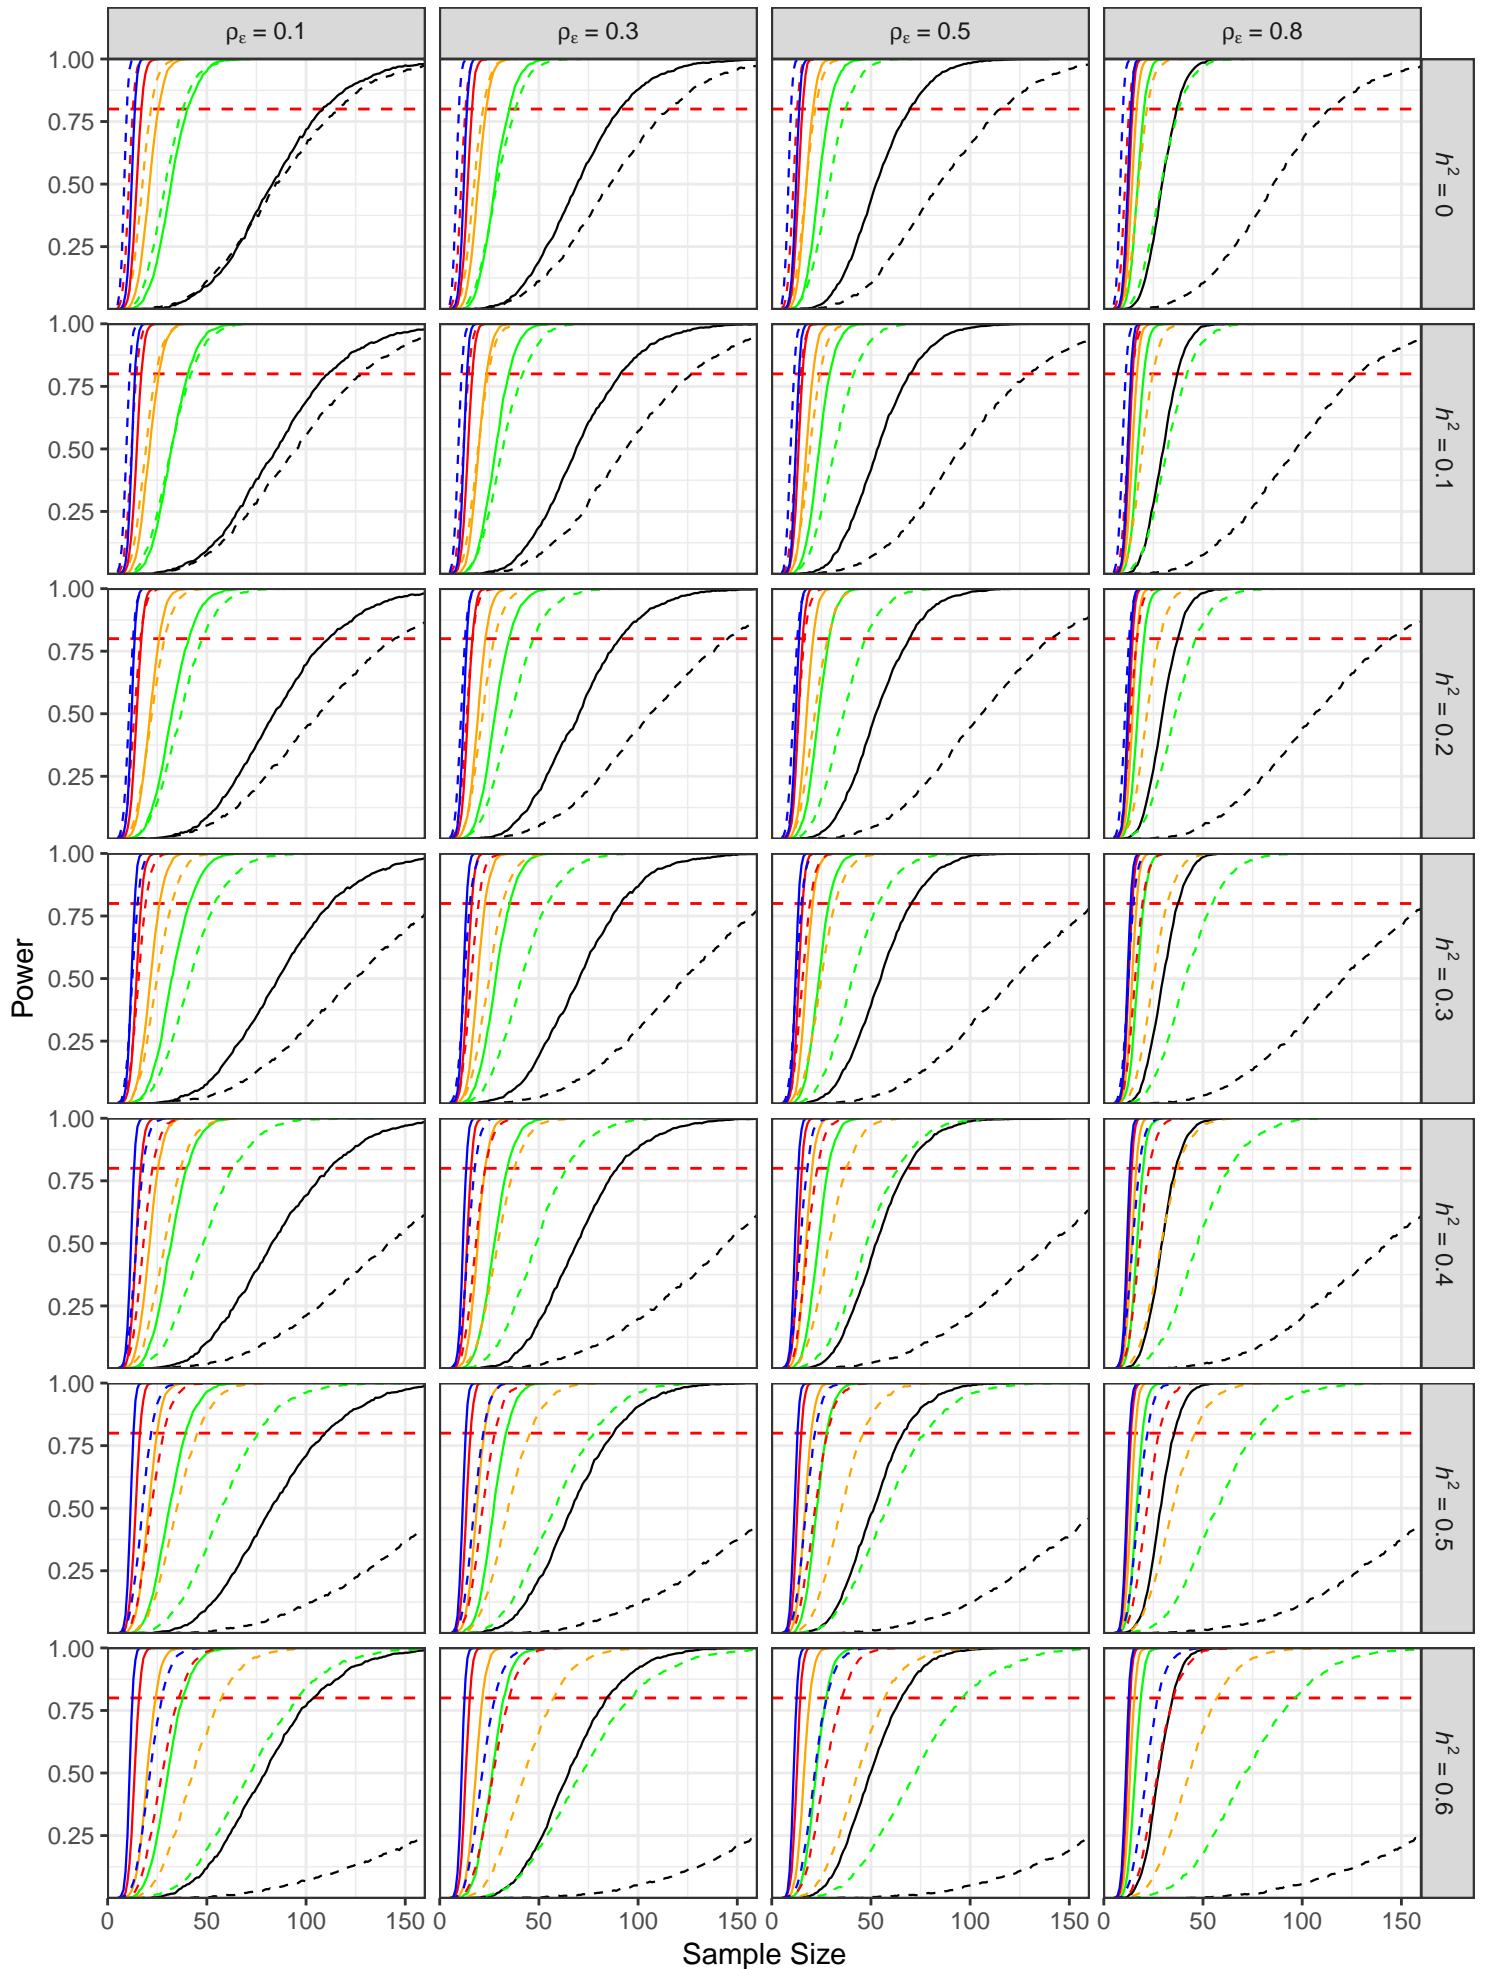

$R^2_{M,E}$  — 0.1 — 0.3 — 0.5 — 0.8 — 1

Design - - Ordinary Case-control — Discordant Twin

$P_K = 0.1$ ,  $E(M) = 3.36$ ,  $\text{Var}(M) = 1$

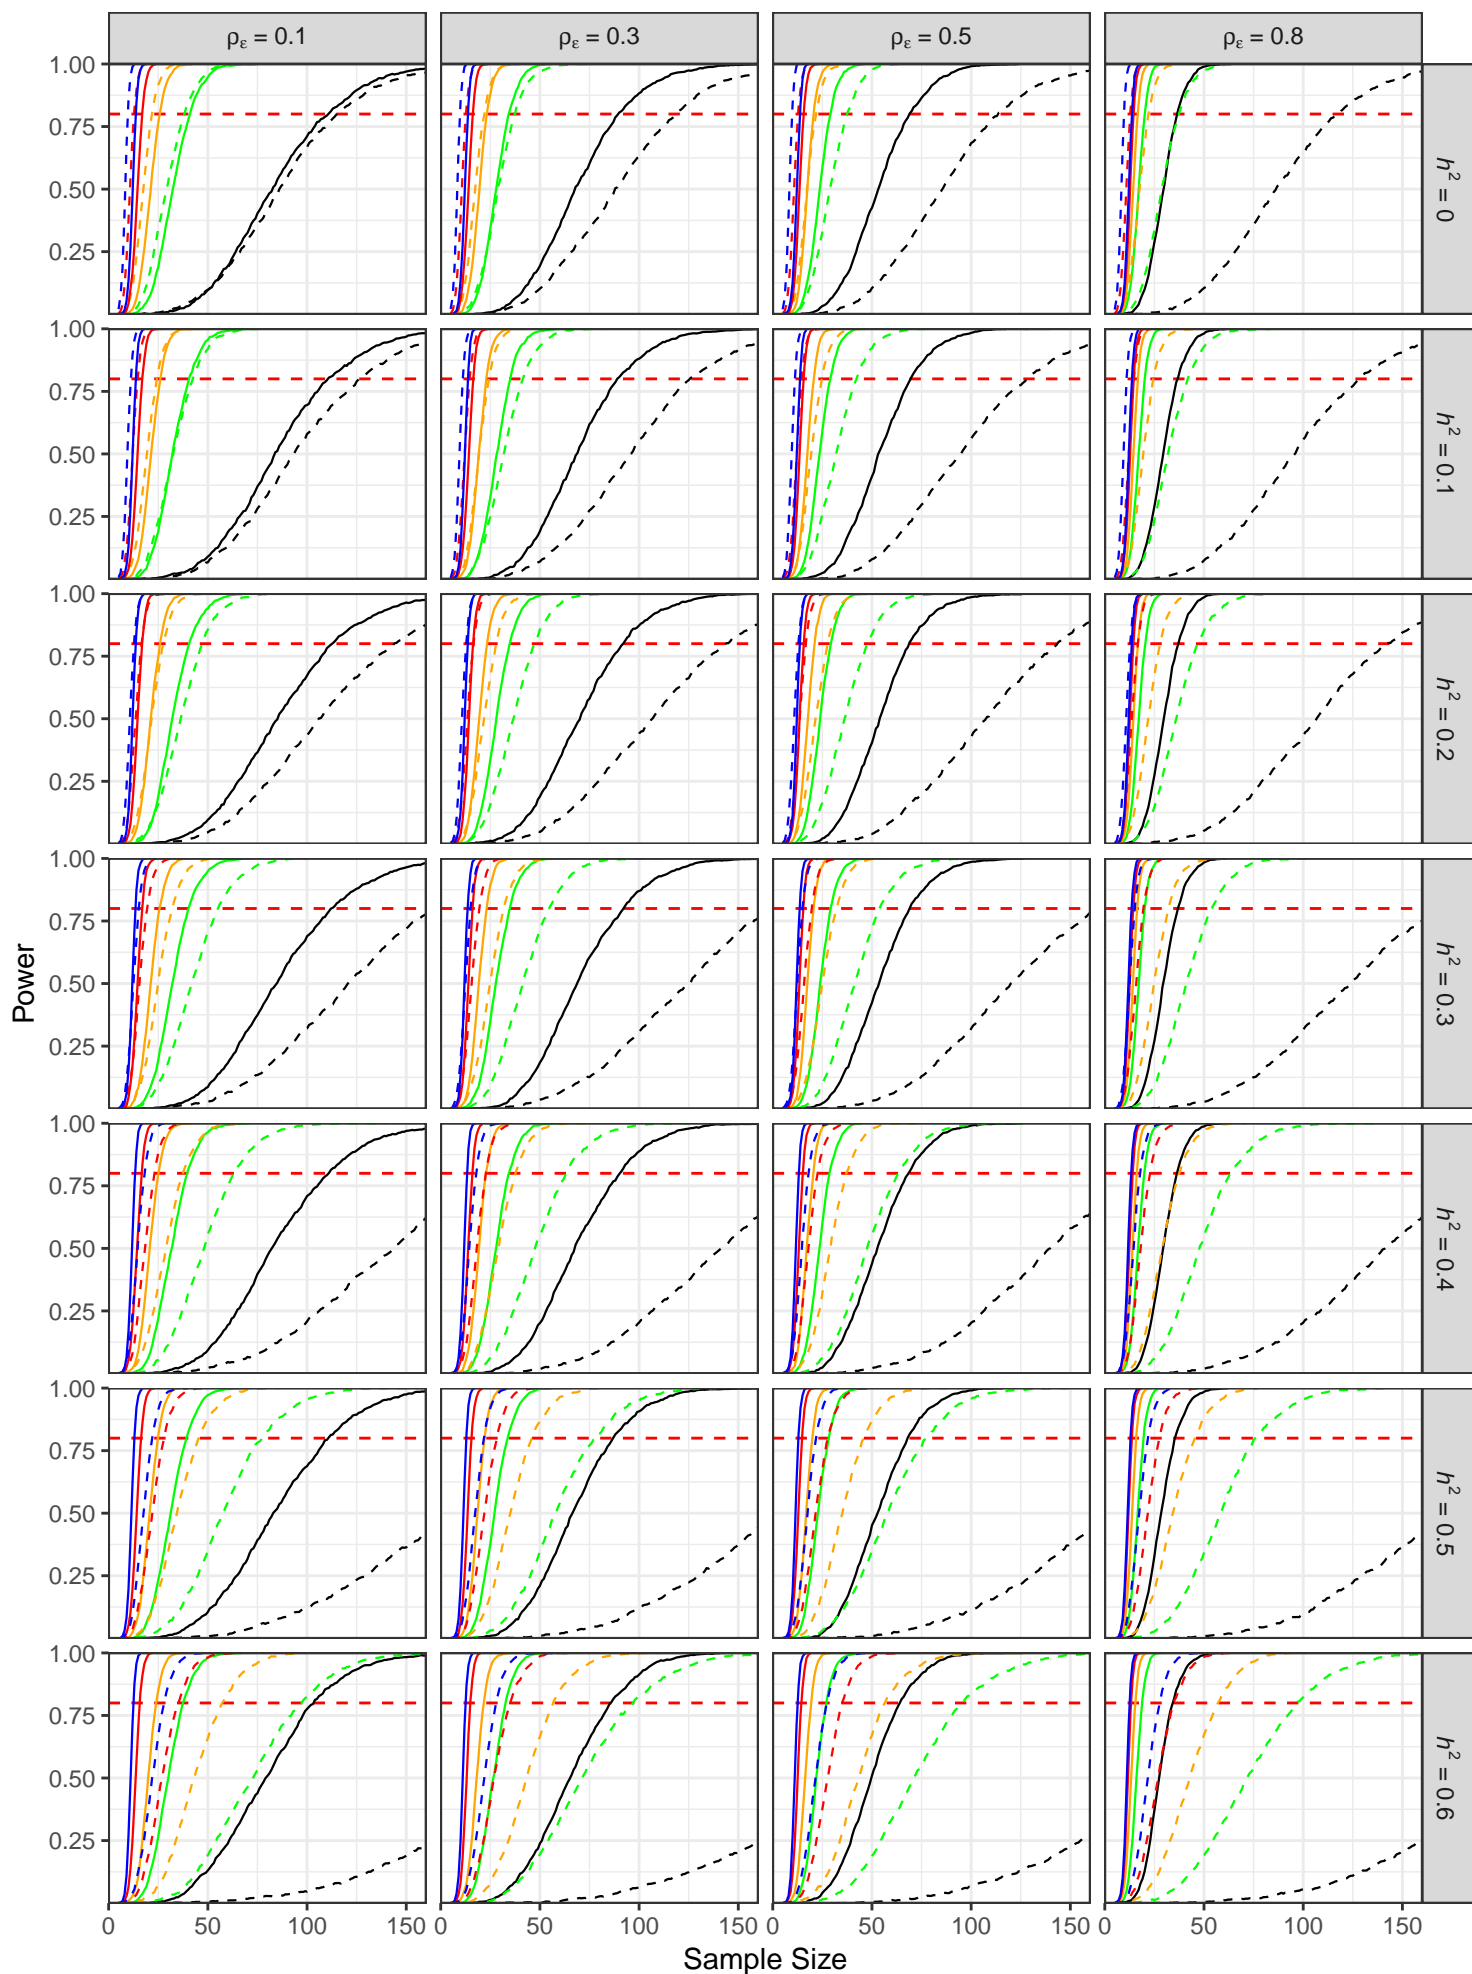

$P_K = 0.1$ ,  $E(M) = 3.36$ ,  $\text{Var}(M) = 2$

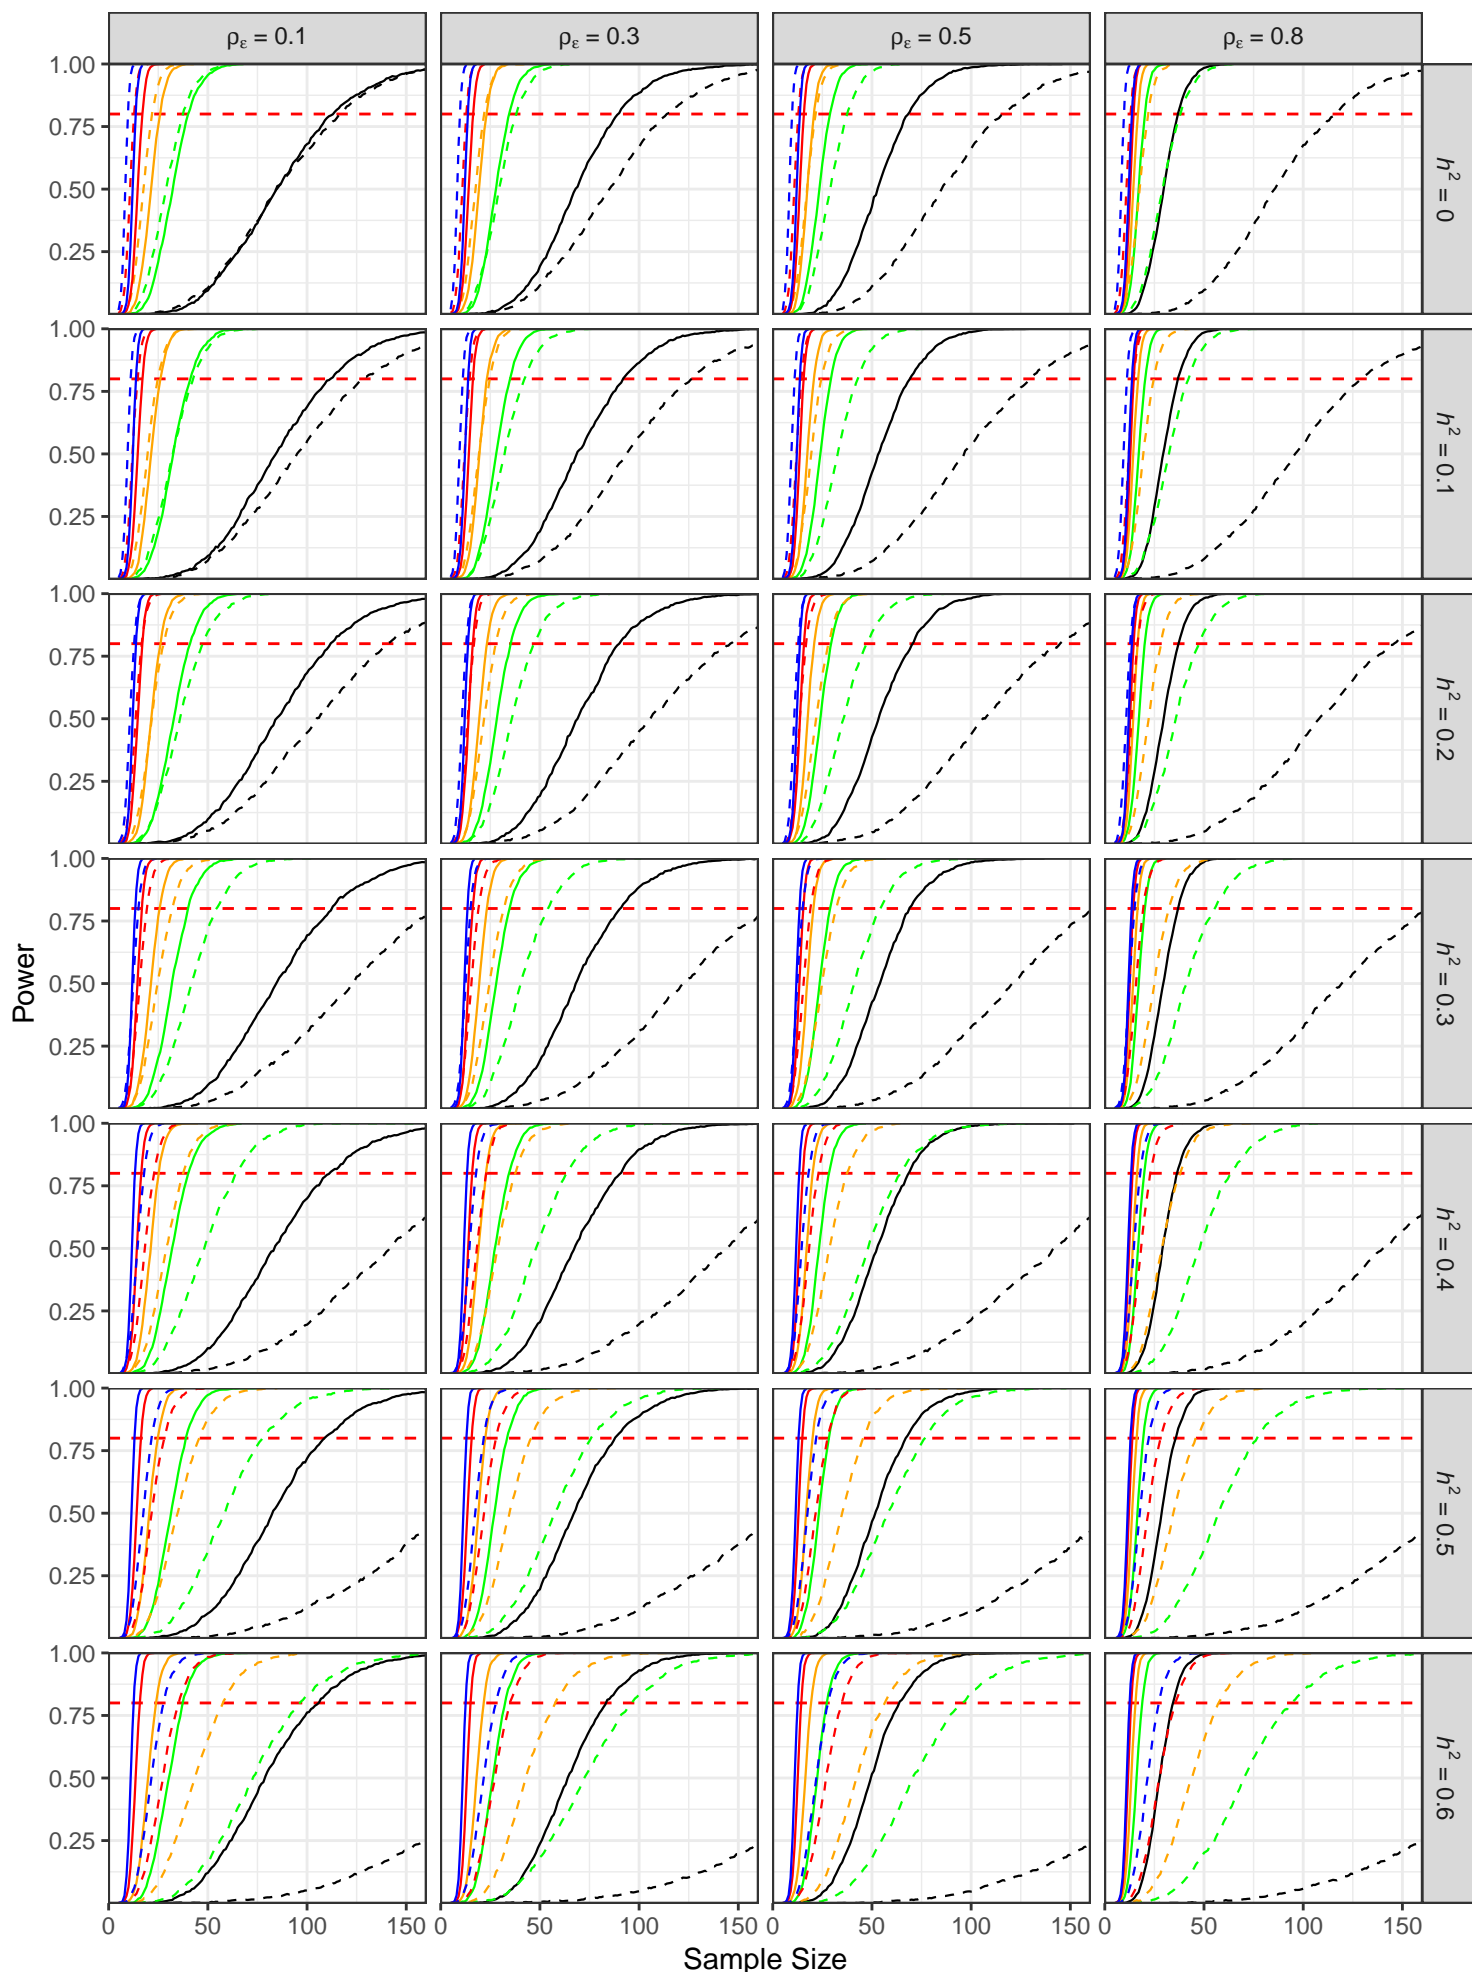

$R^2_{M,E}$  — 0.1 — 0.3 — 0.5 — 0.8 — 1

Design - - Ordinary Case-control — Discordant Twin



$P_K = 0.1$ ,  $E(M) = 3.36$ ,  $\text{Var}(M) = 3$

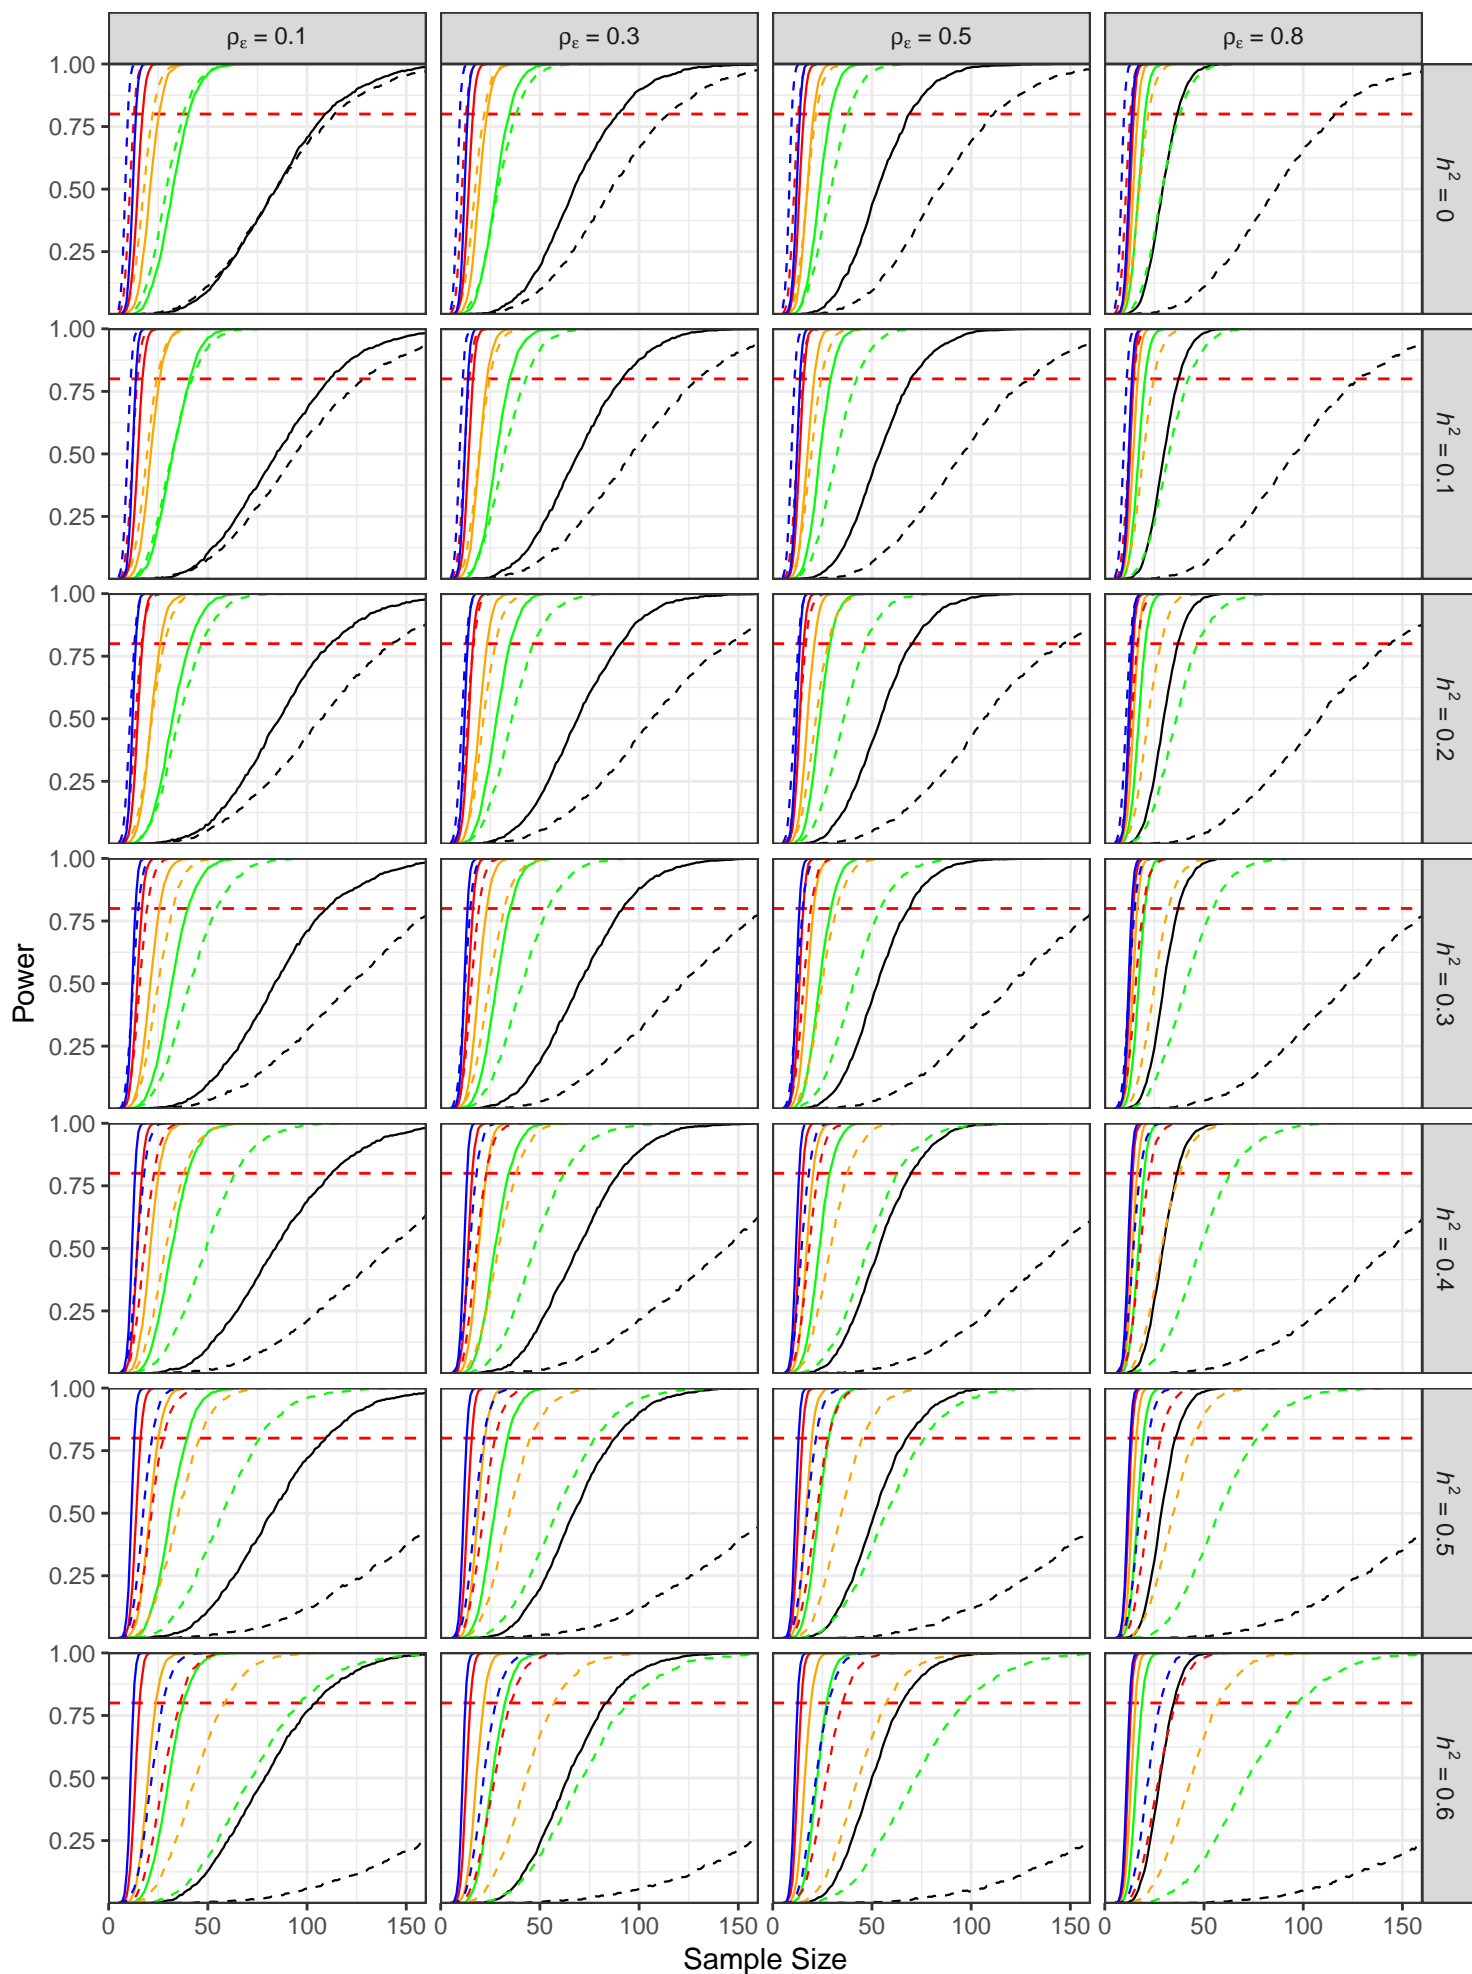

$R^2_{M,E}$  — 0.1 — 0.3 — 0.5 — 0.8 — 1

Design - - Ordinary Case-control — Discordant Twin

$P_K = 0.1$ ,  $E(M) = 3.36$ ,  $\text{Var}(M) = 4$

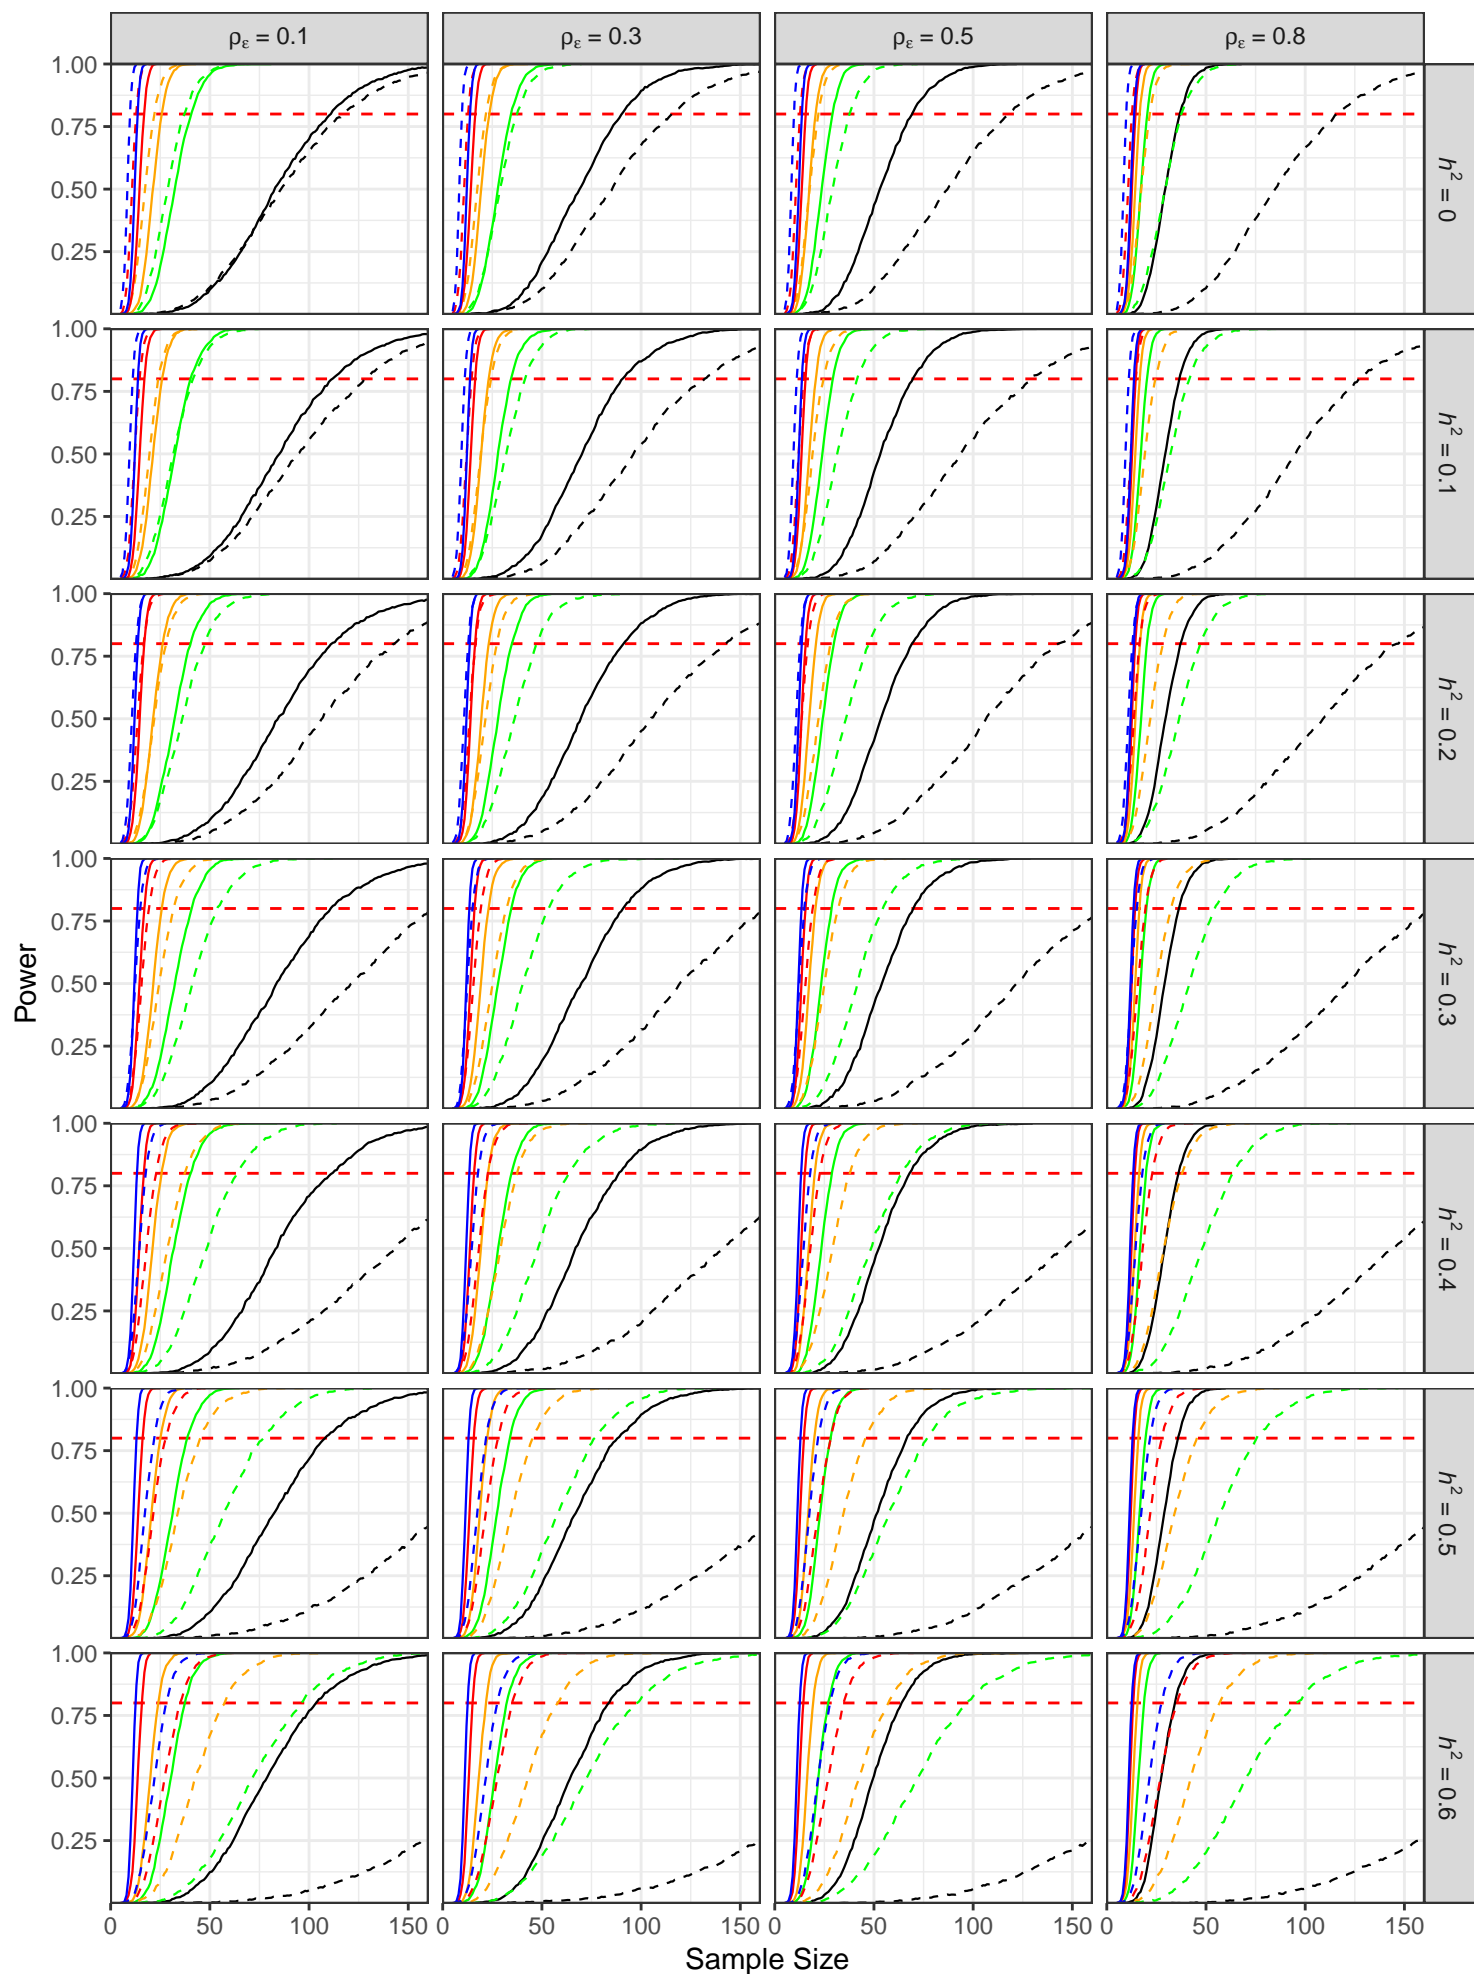

$P_K = 0.2$ ,  $E(M) = -3.78$ ,  $\text{Var}(M) = 0.06$

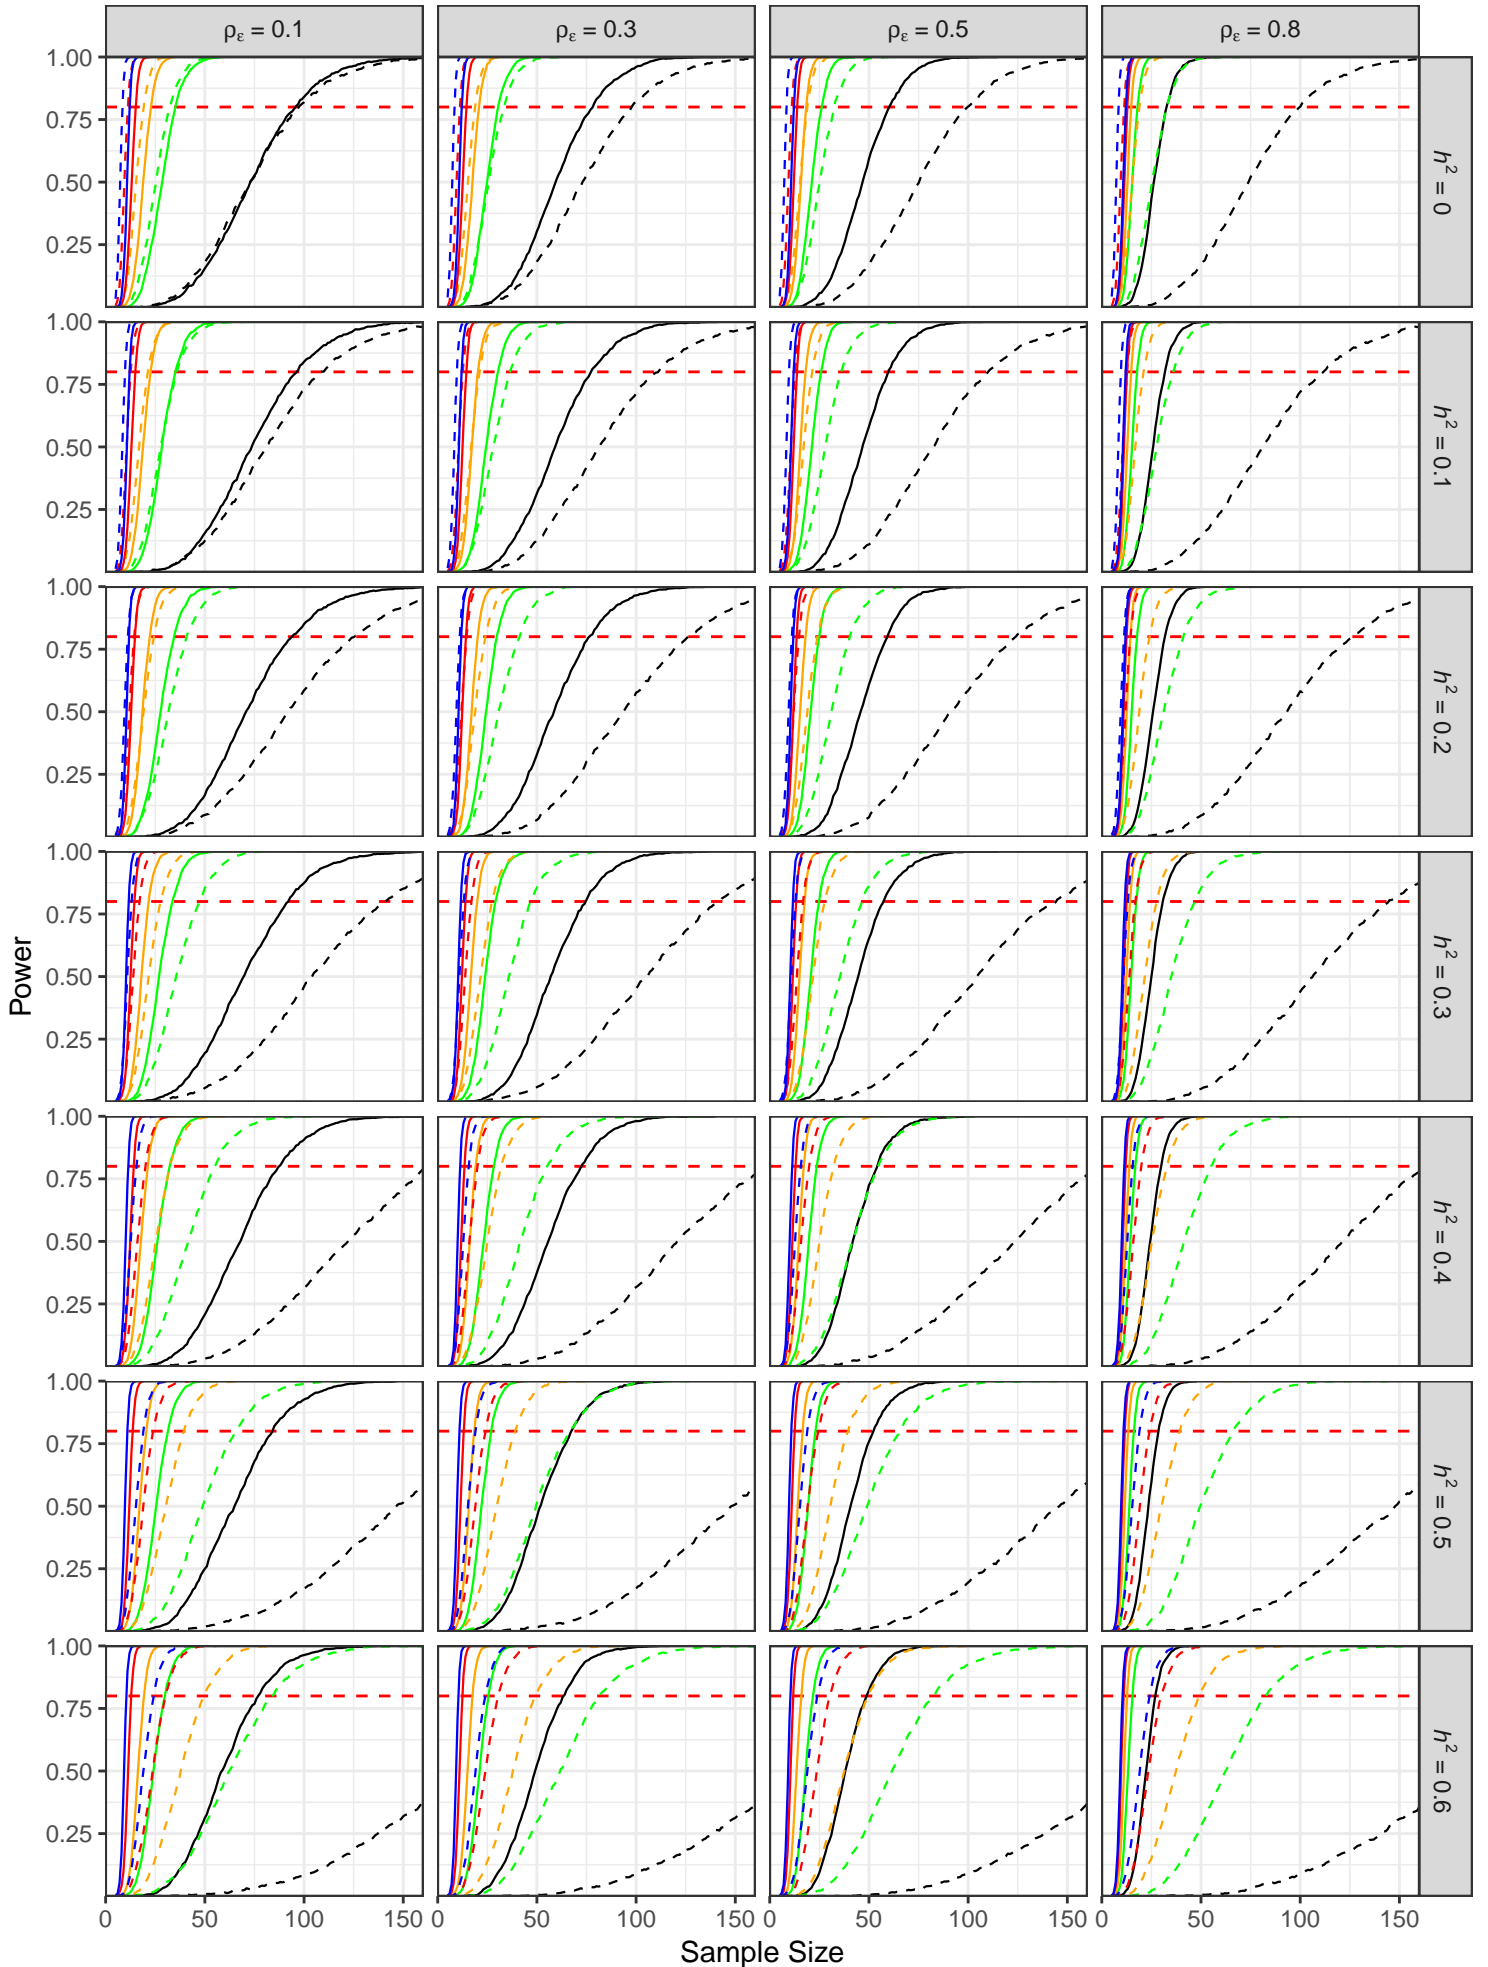

$P_K = 0.2$ ,  $E(M) = -3.78$ ,  $Var(M) = 1$

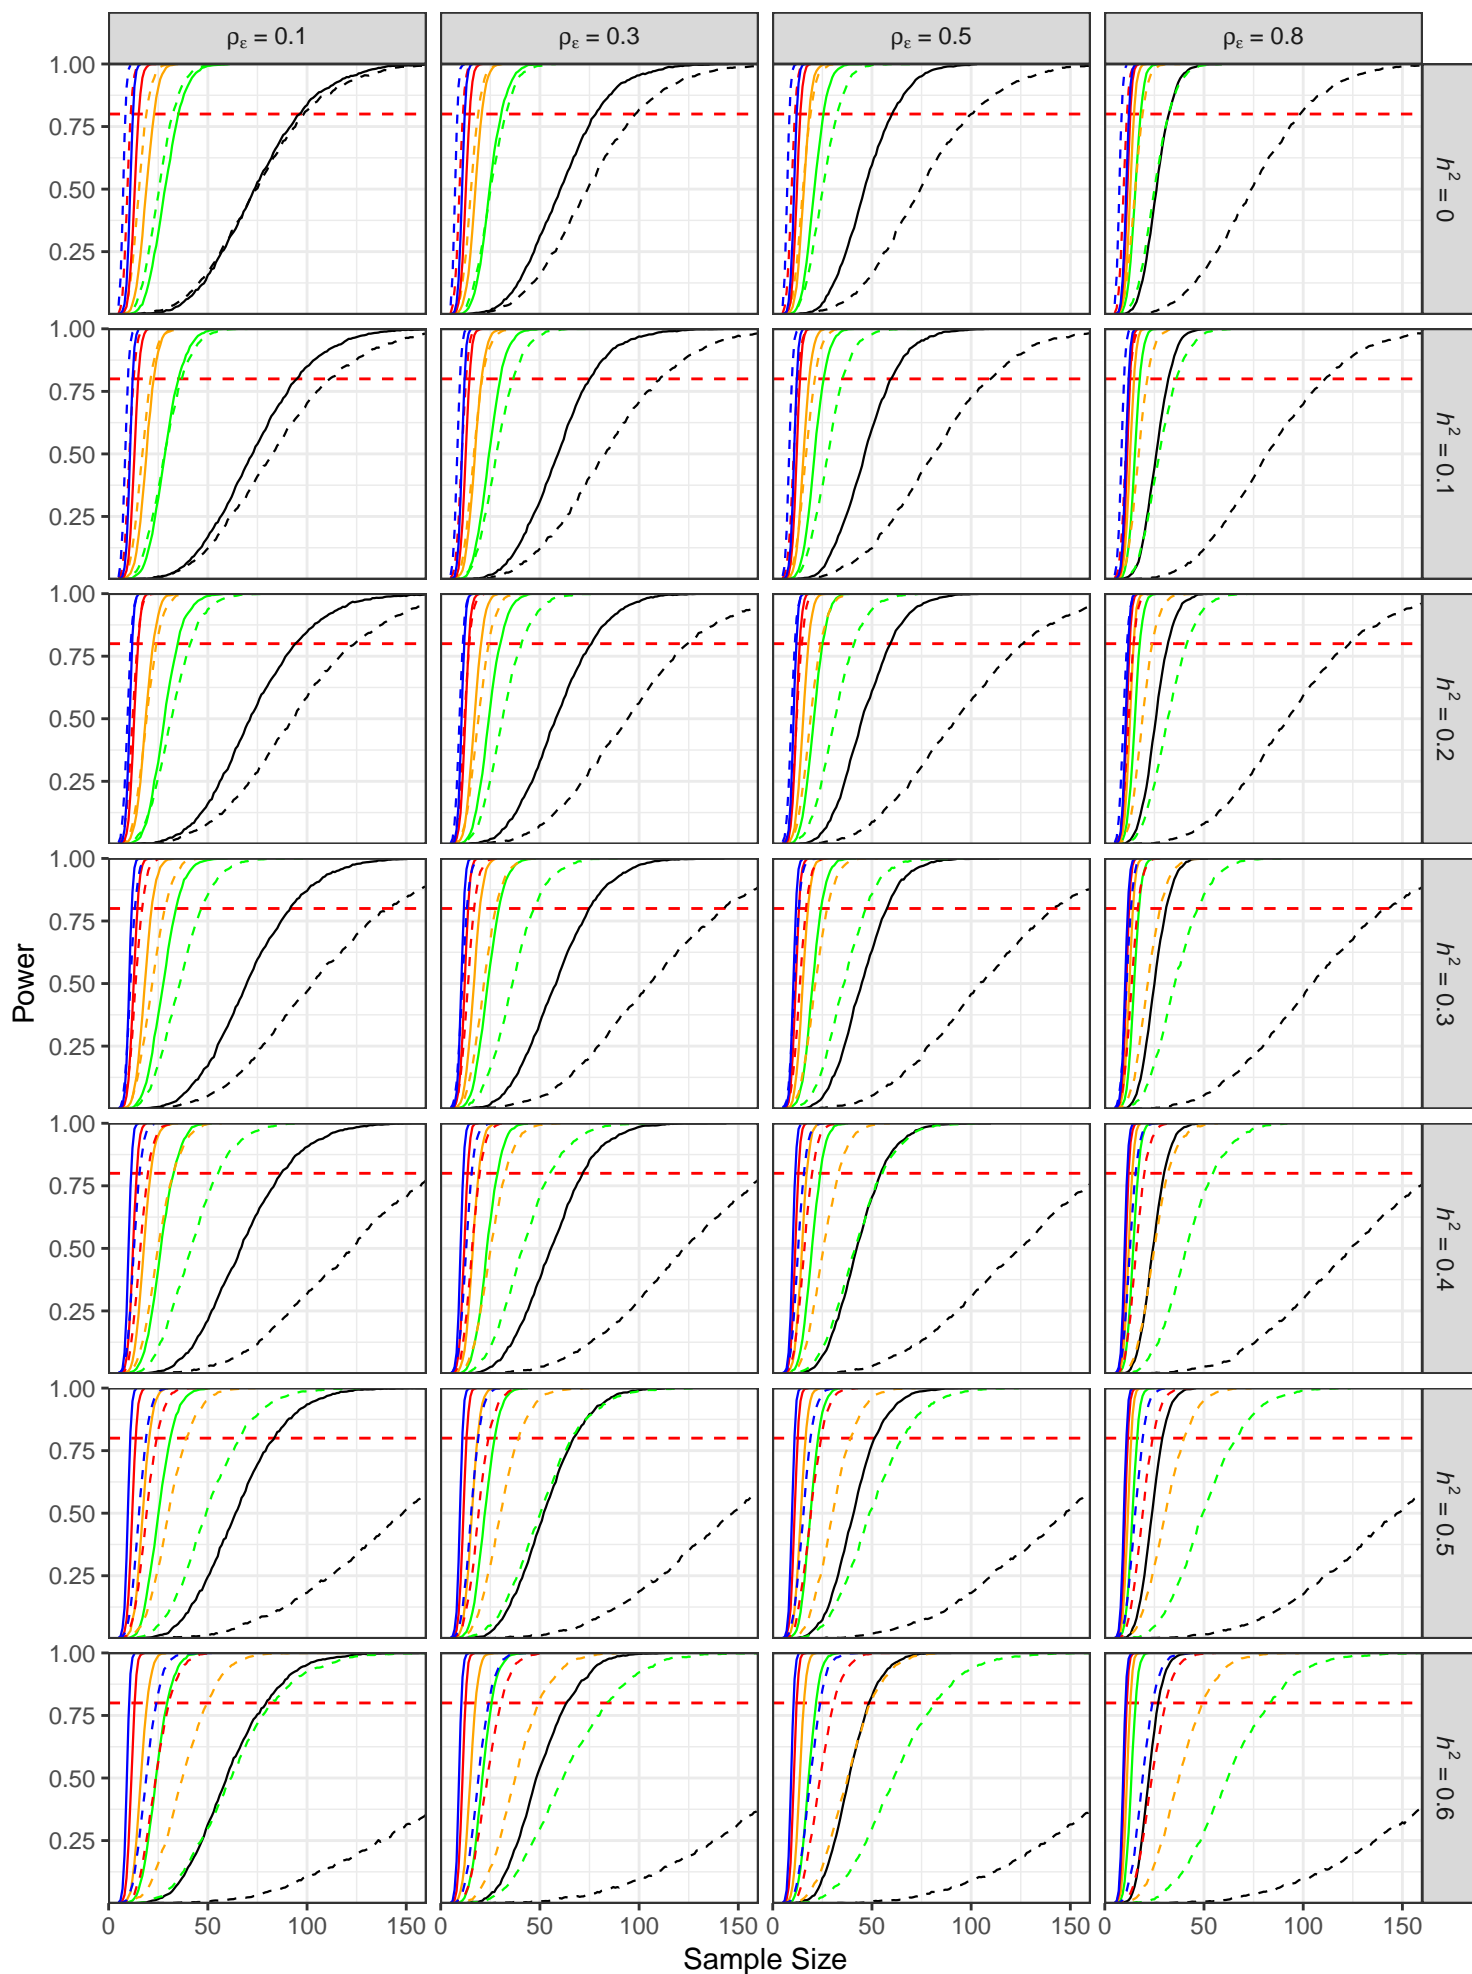

$P_K = 0.2$ ,  $E(M) = -3.78$ ,  $Var(M) = 2$

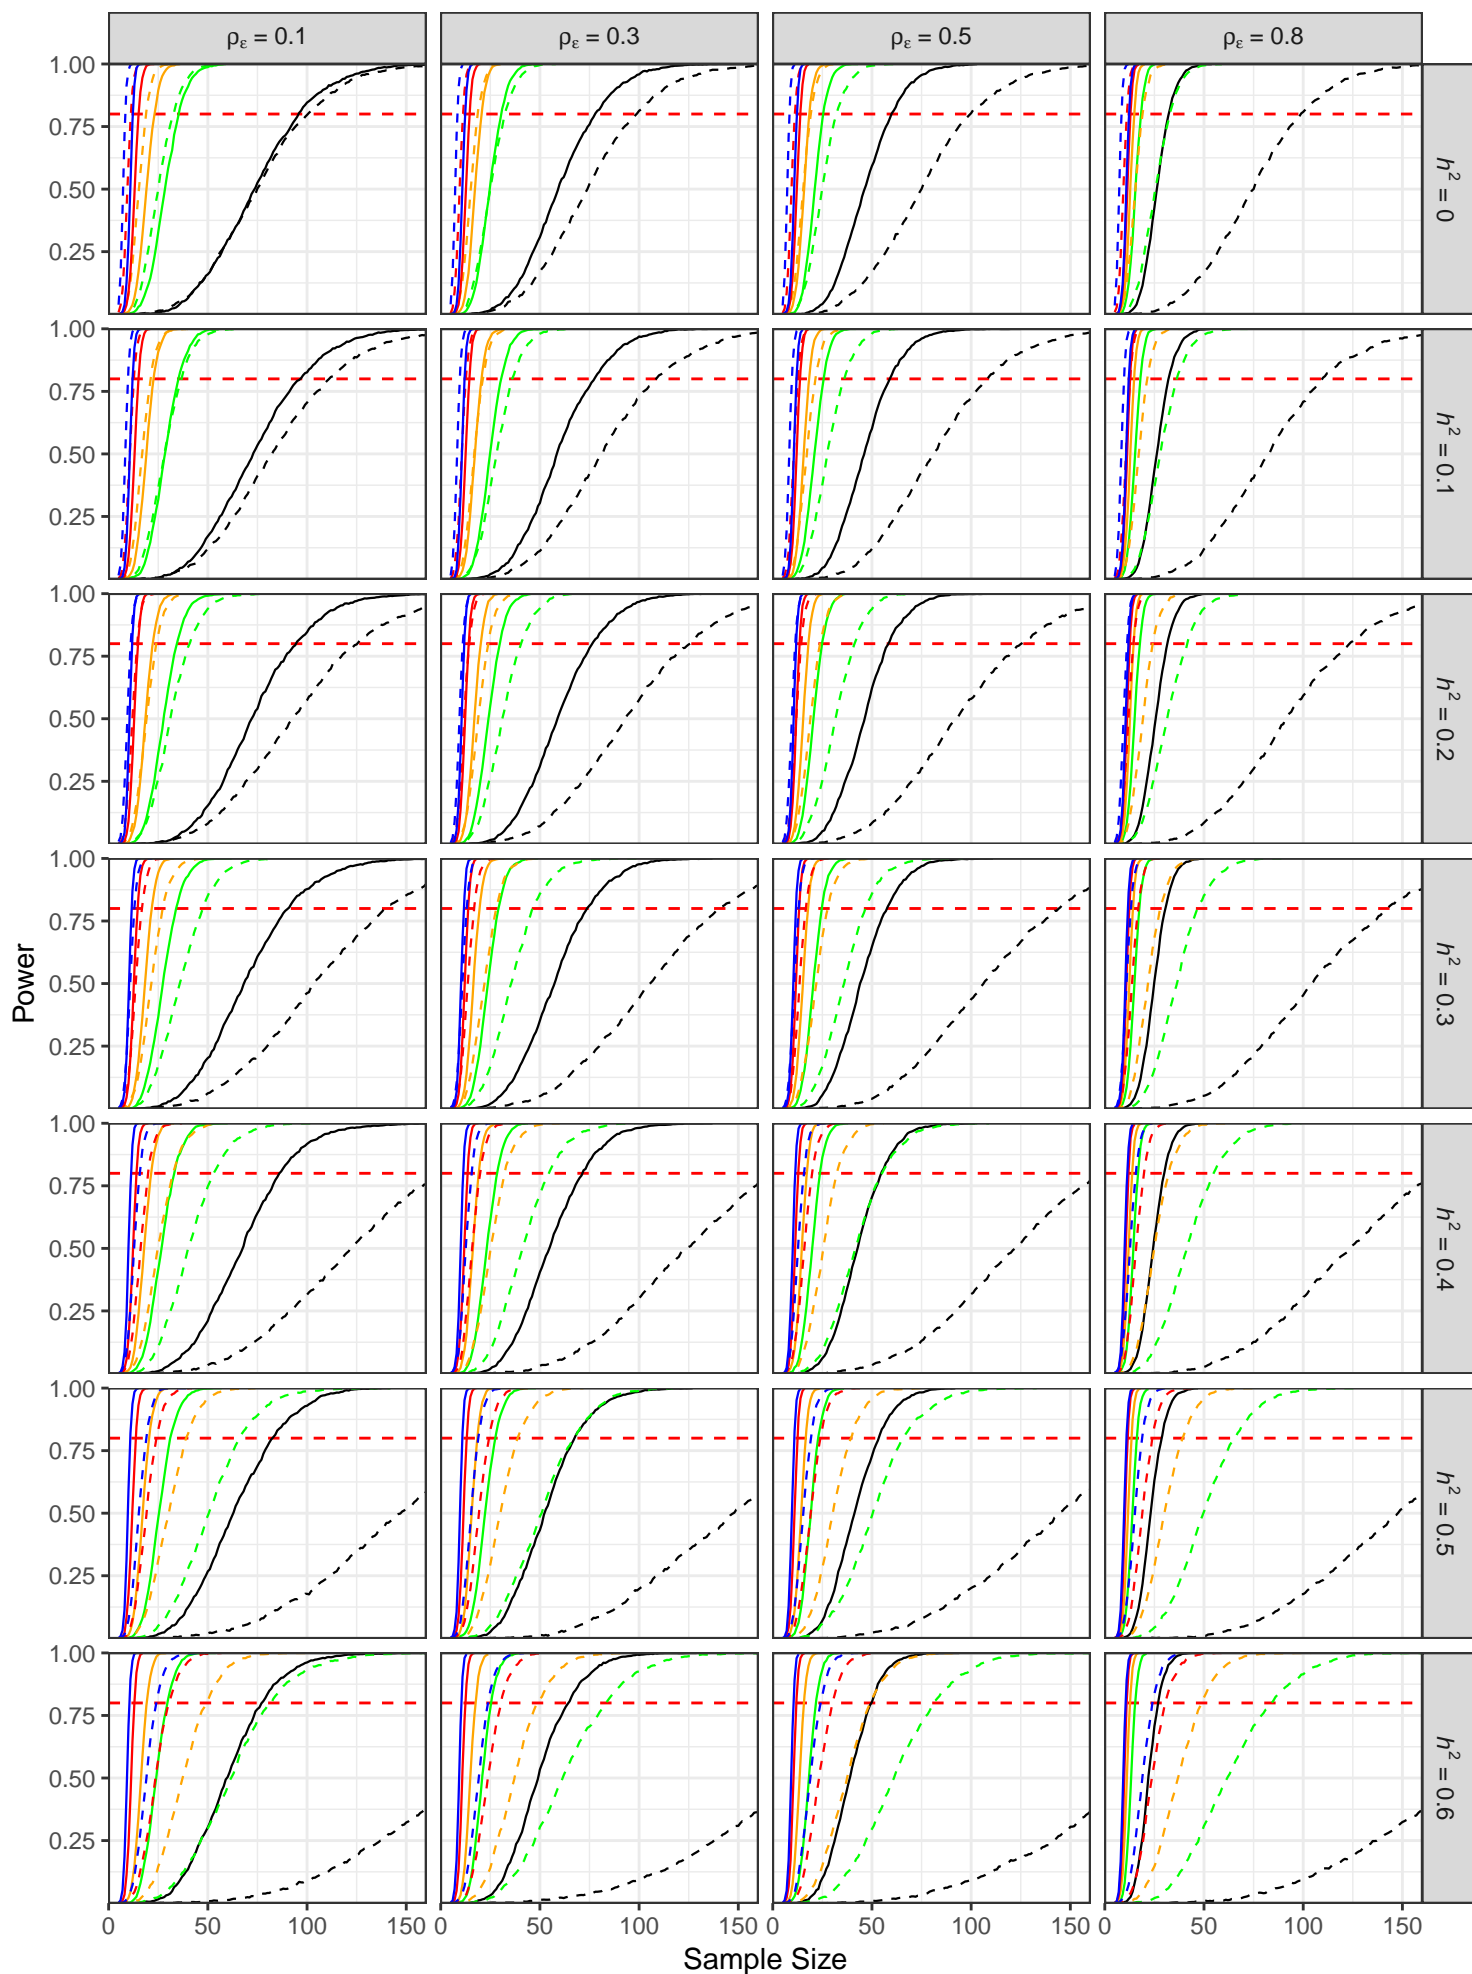

$R^2_{M,E}$  — 0.1 — 0.3 — 0.5 — 0.8 — 1

Design - - Ordinary Case-control — Discordant Twin



$P_K = 0.2$ ,  $E(M) = -3.78$ ,  $Var(M) = 3$

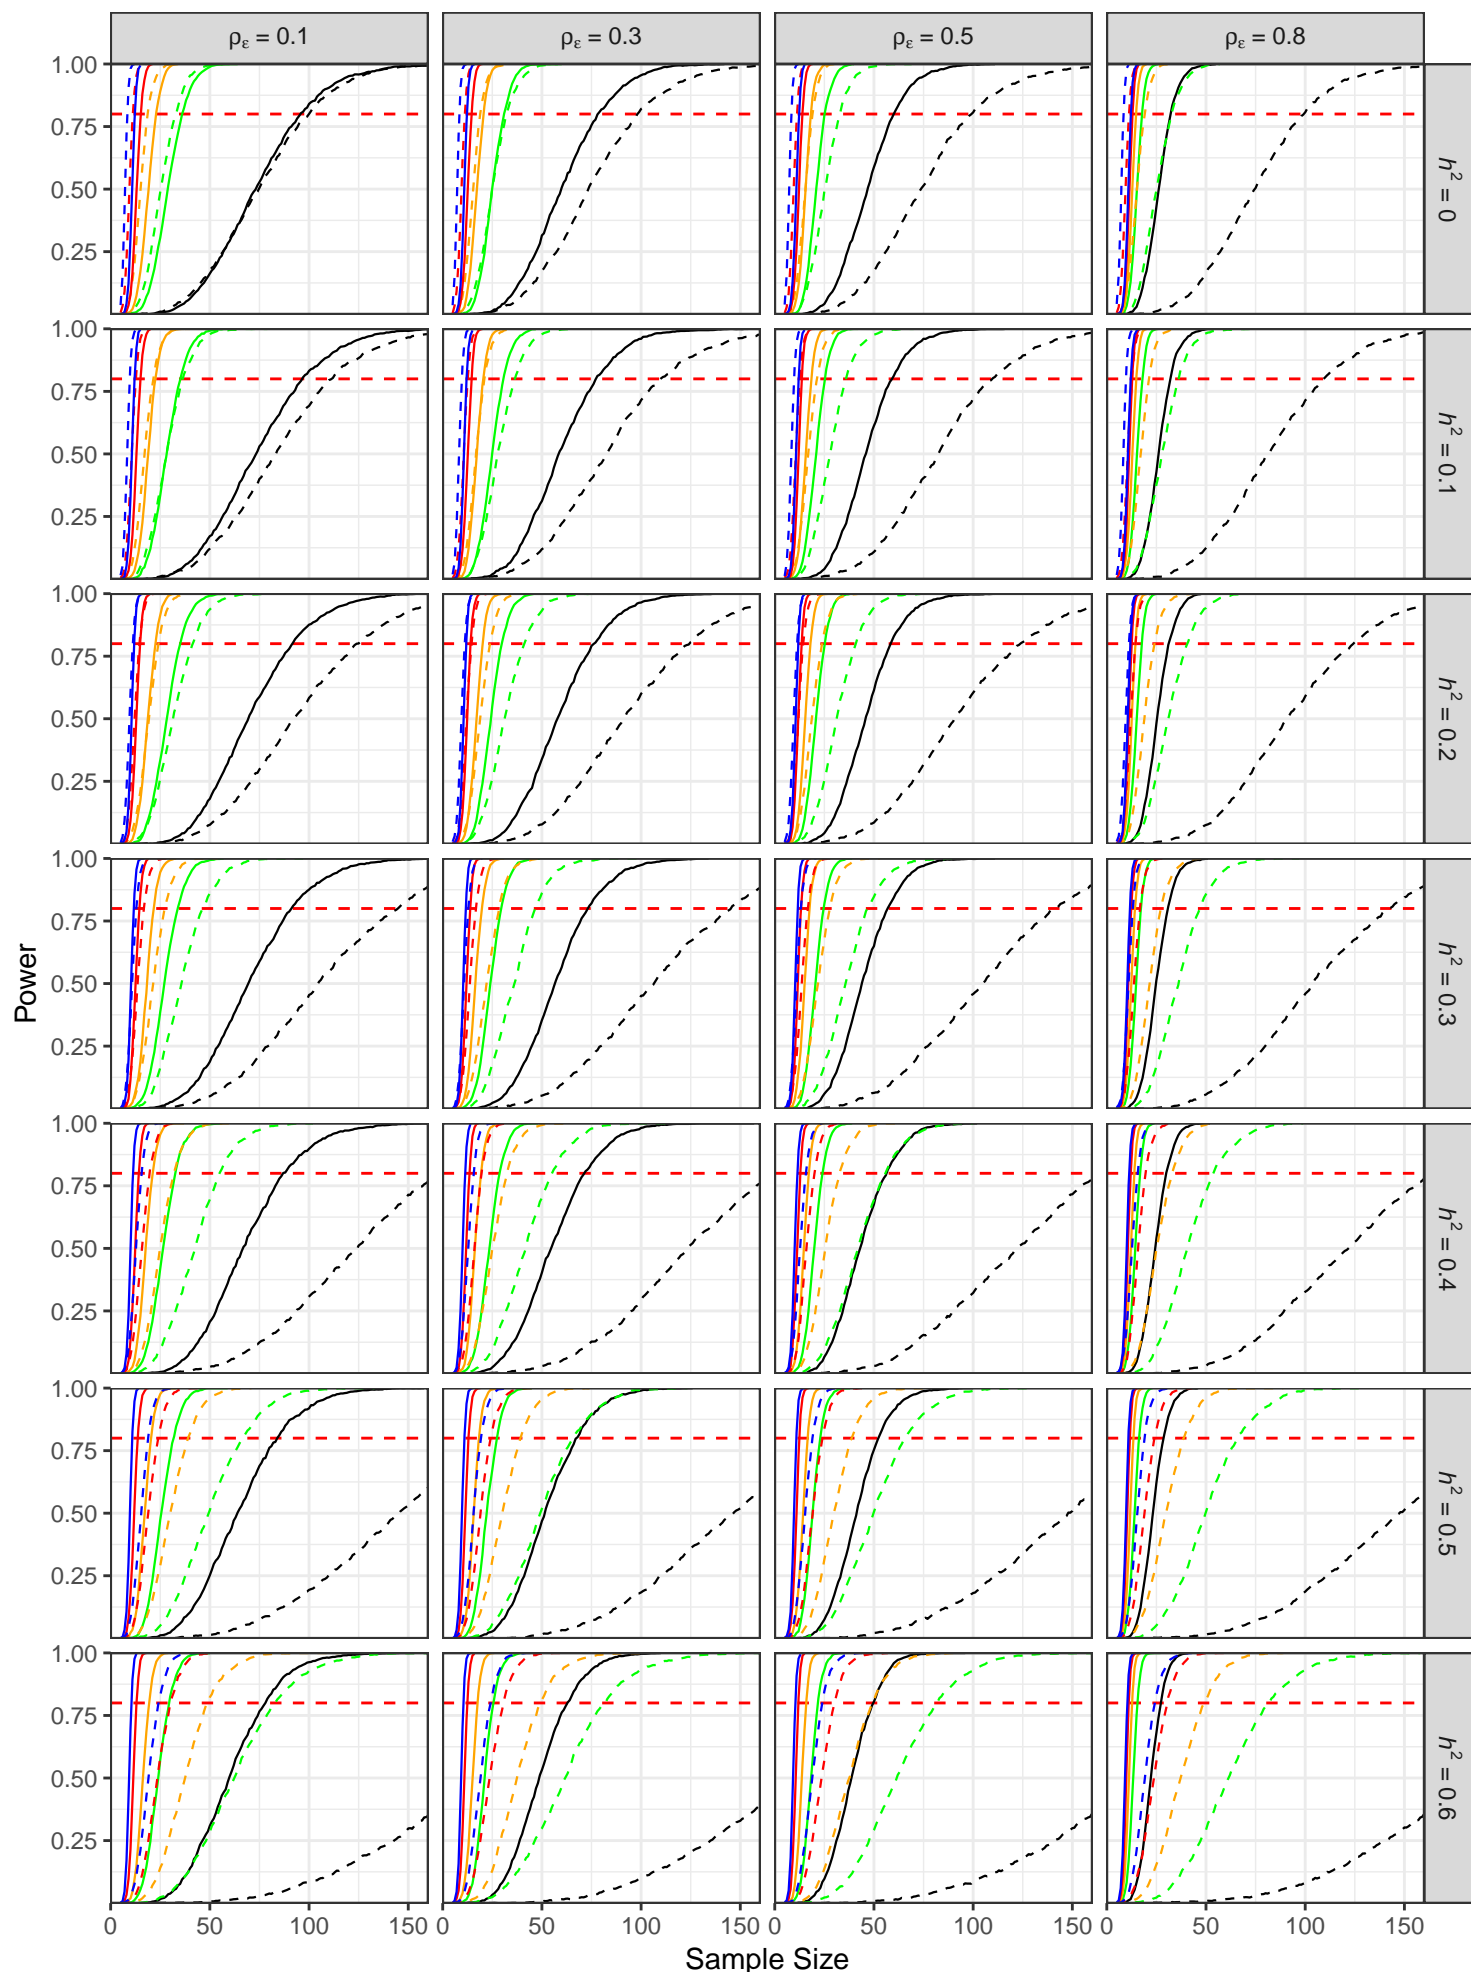

$P_K = 0.2$ ,  $E(M) = -3.78$ ,  $\text{Var}(M) = 4$

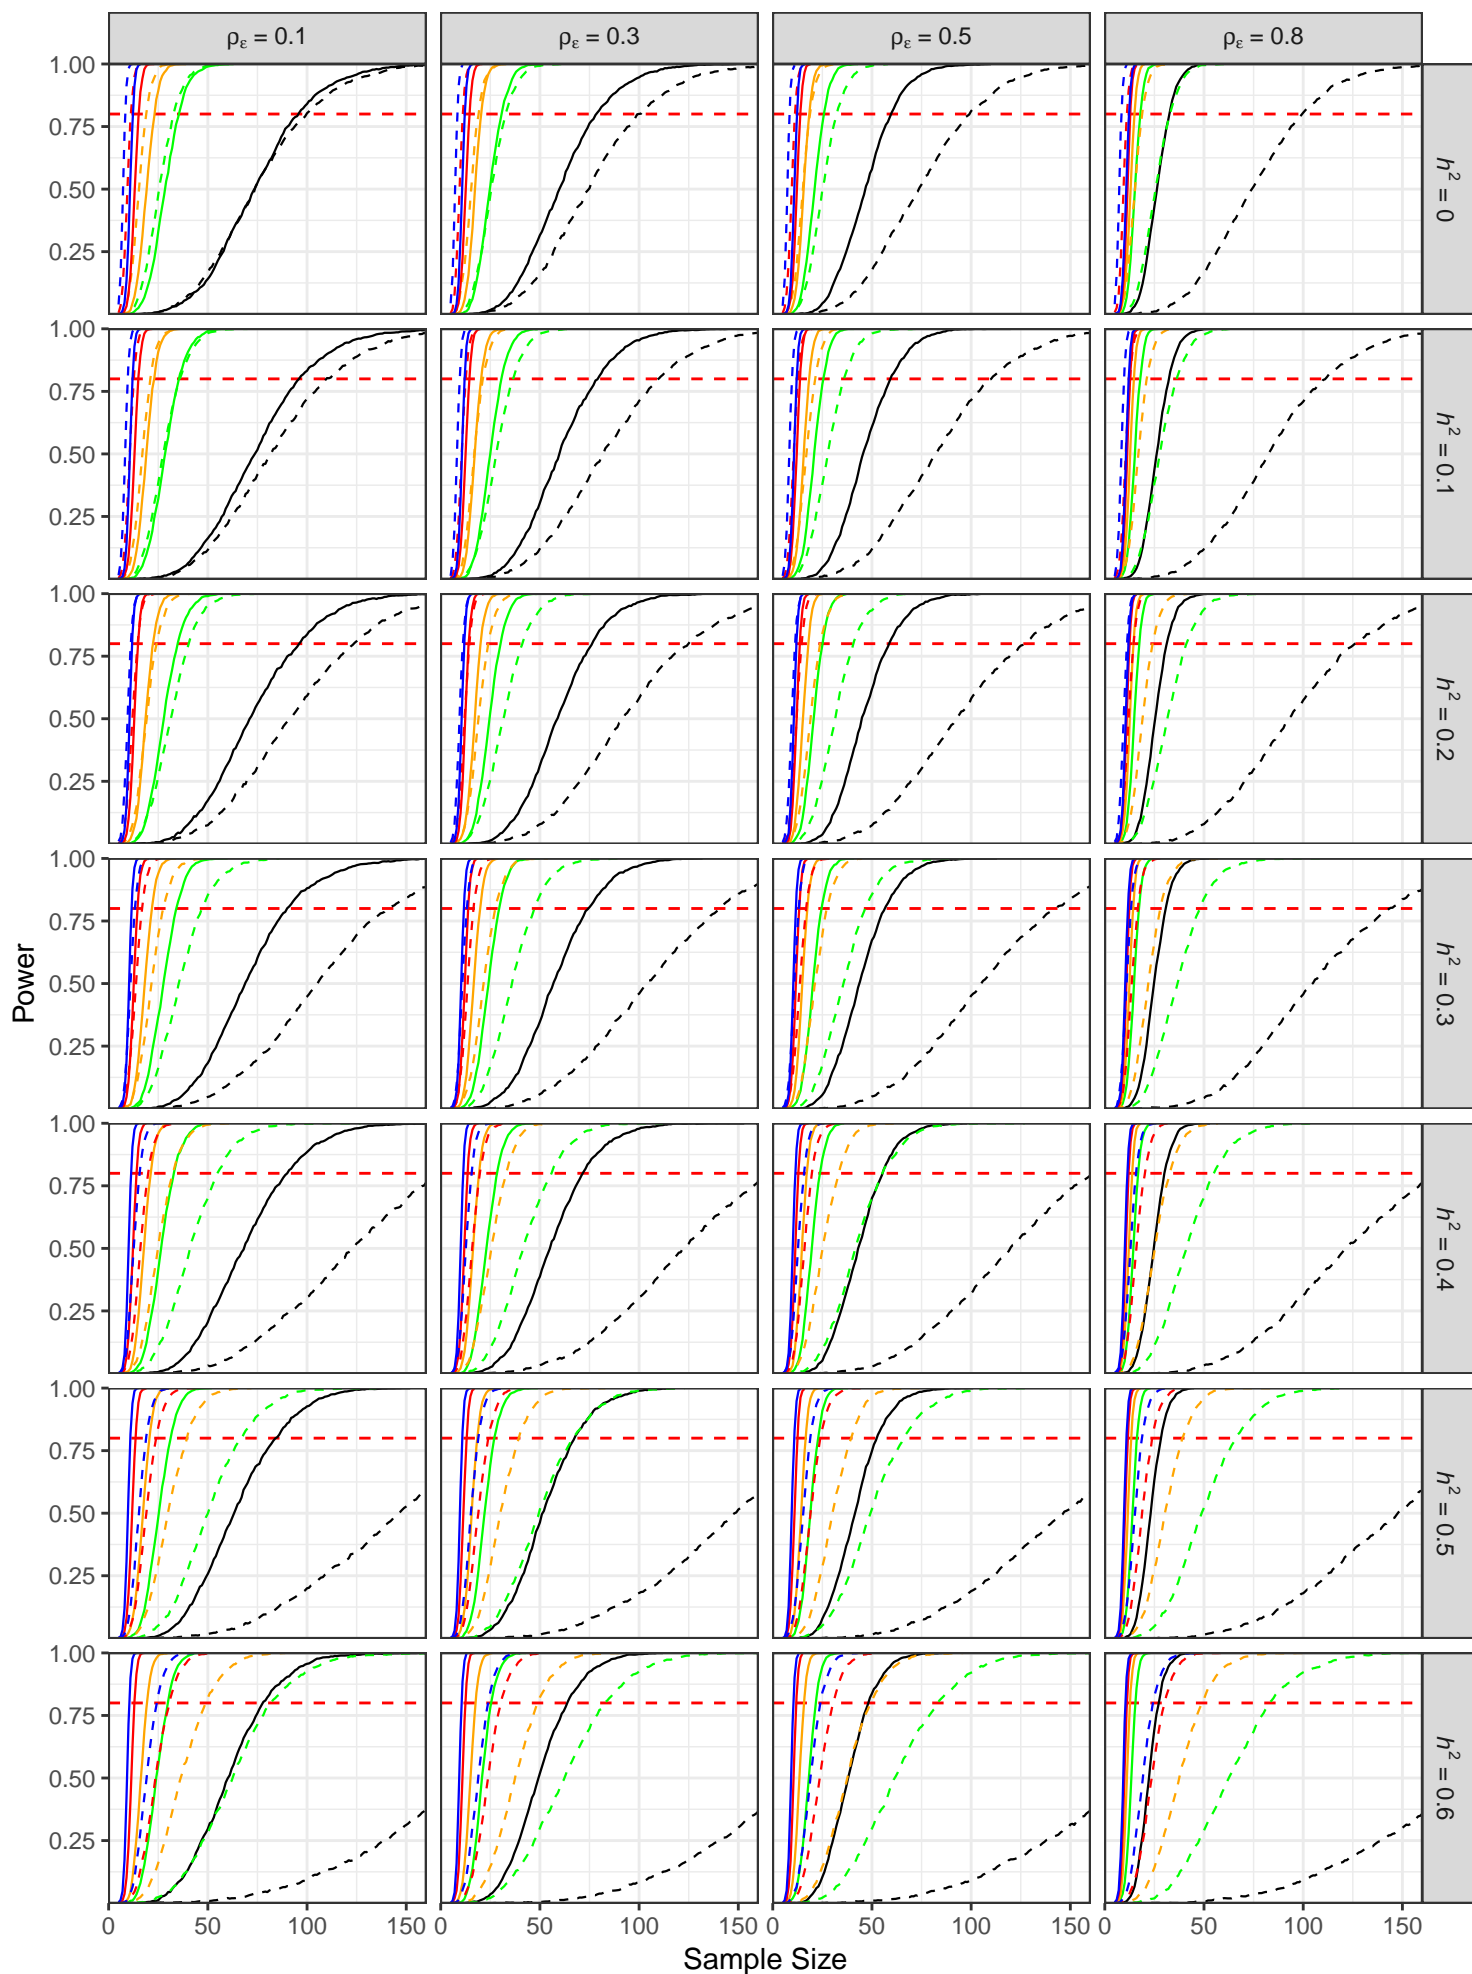

$P_K = 0.2$ ,  $E(M) = 3.36$ ,  $Var(M) = 0.06$

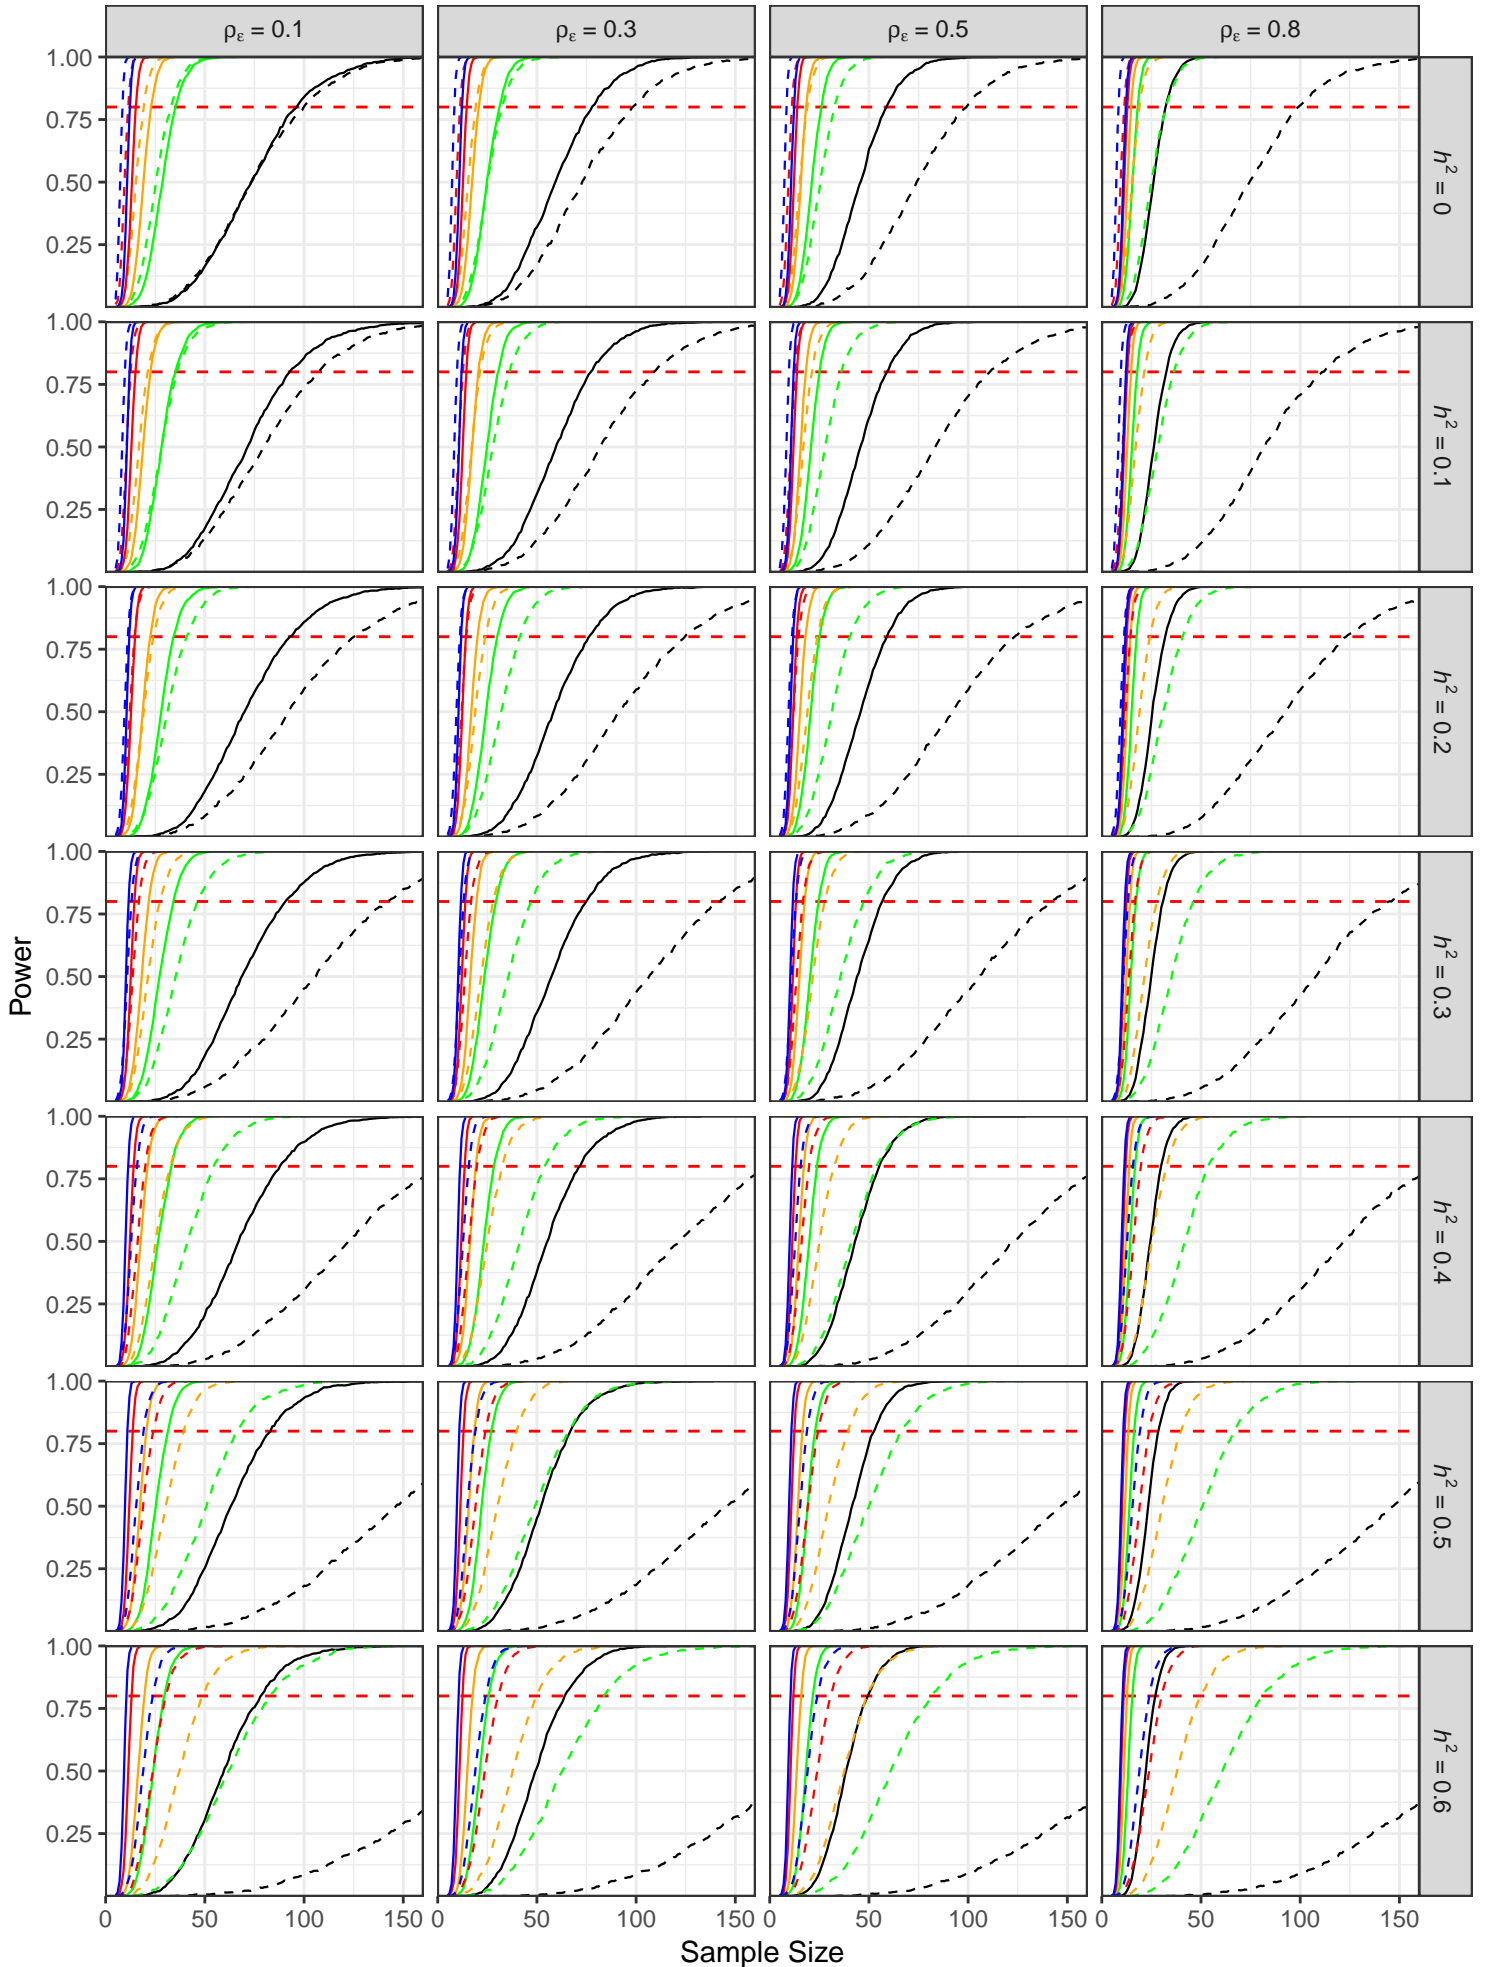

$R^2_{M,E}$  — 0.1 — 0.3 — 0.5 — 0.8 — 1

Design - - Ordinary Case-control — Discordant Twin

$P_K = 0.2$ ,  $E(M) = 3.36$ ,  $Var(M) = 1$

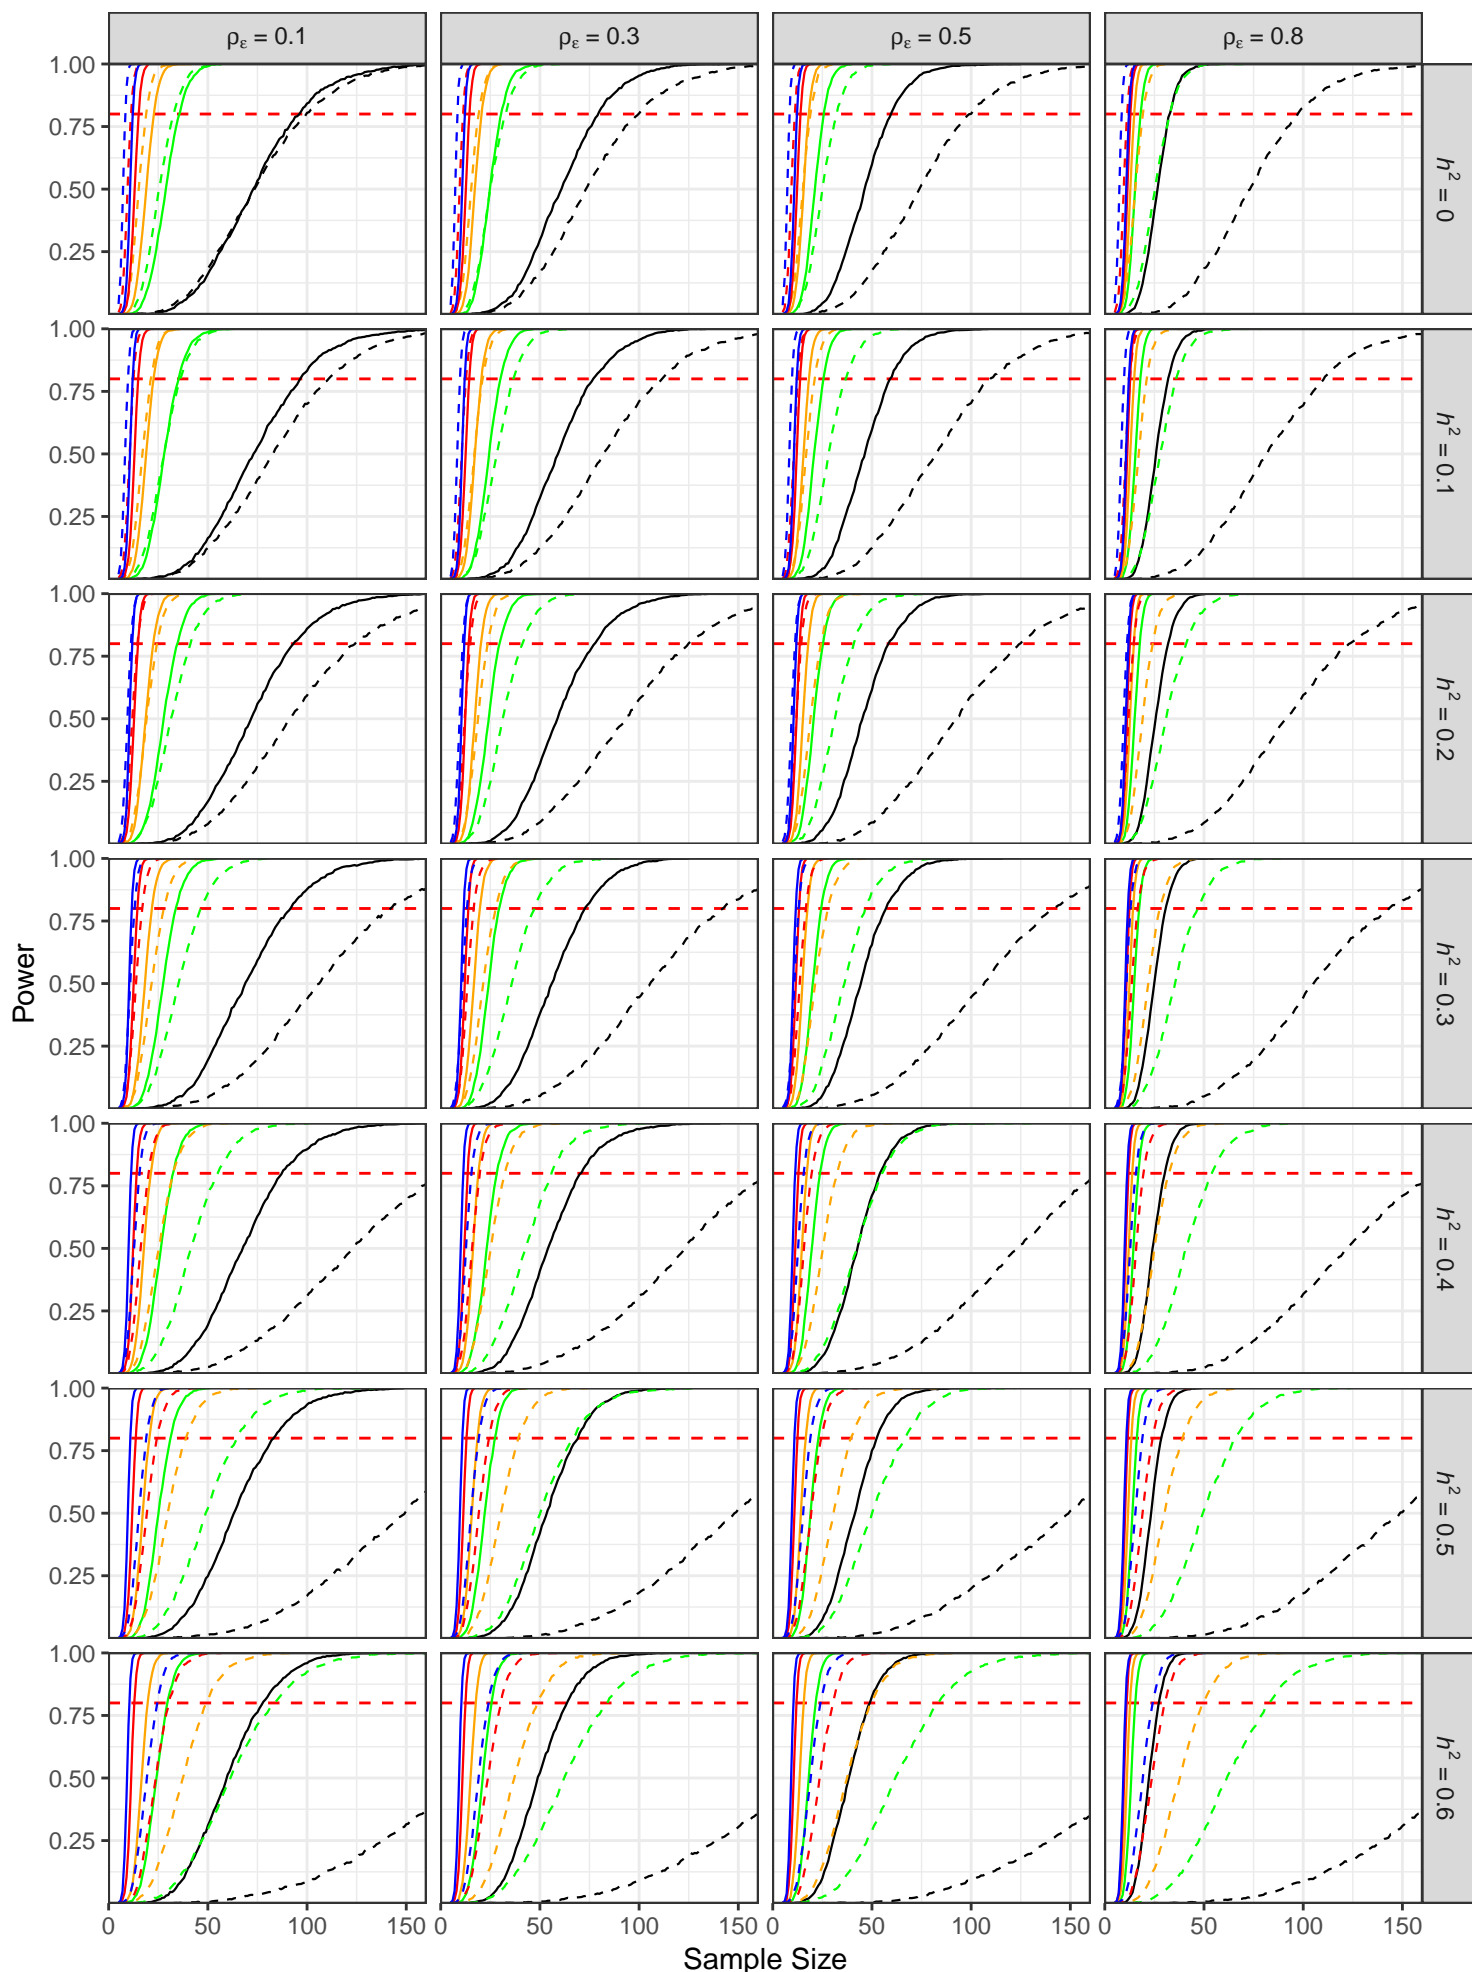

$P_K = 0.2$ ,  $E(M) = 3.36$ ,  $Var(M) = 2$

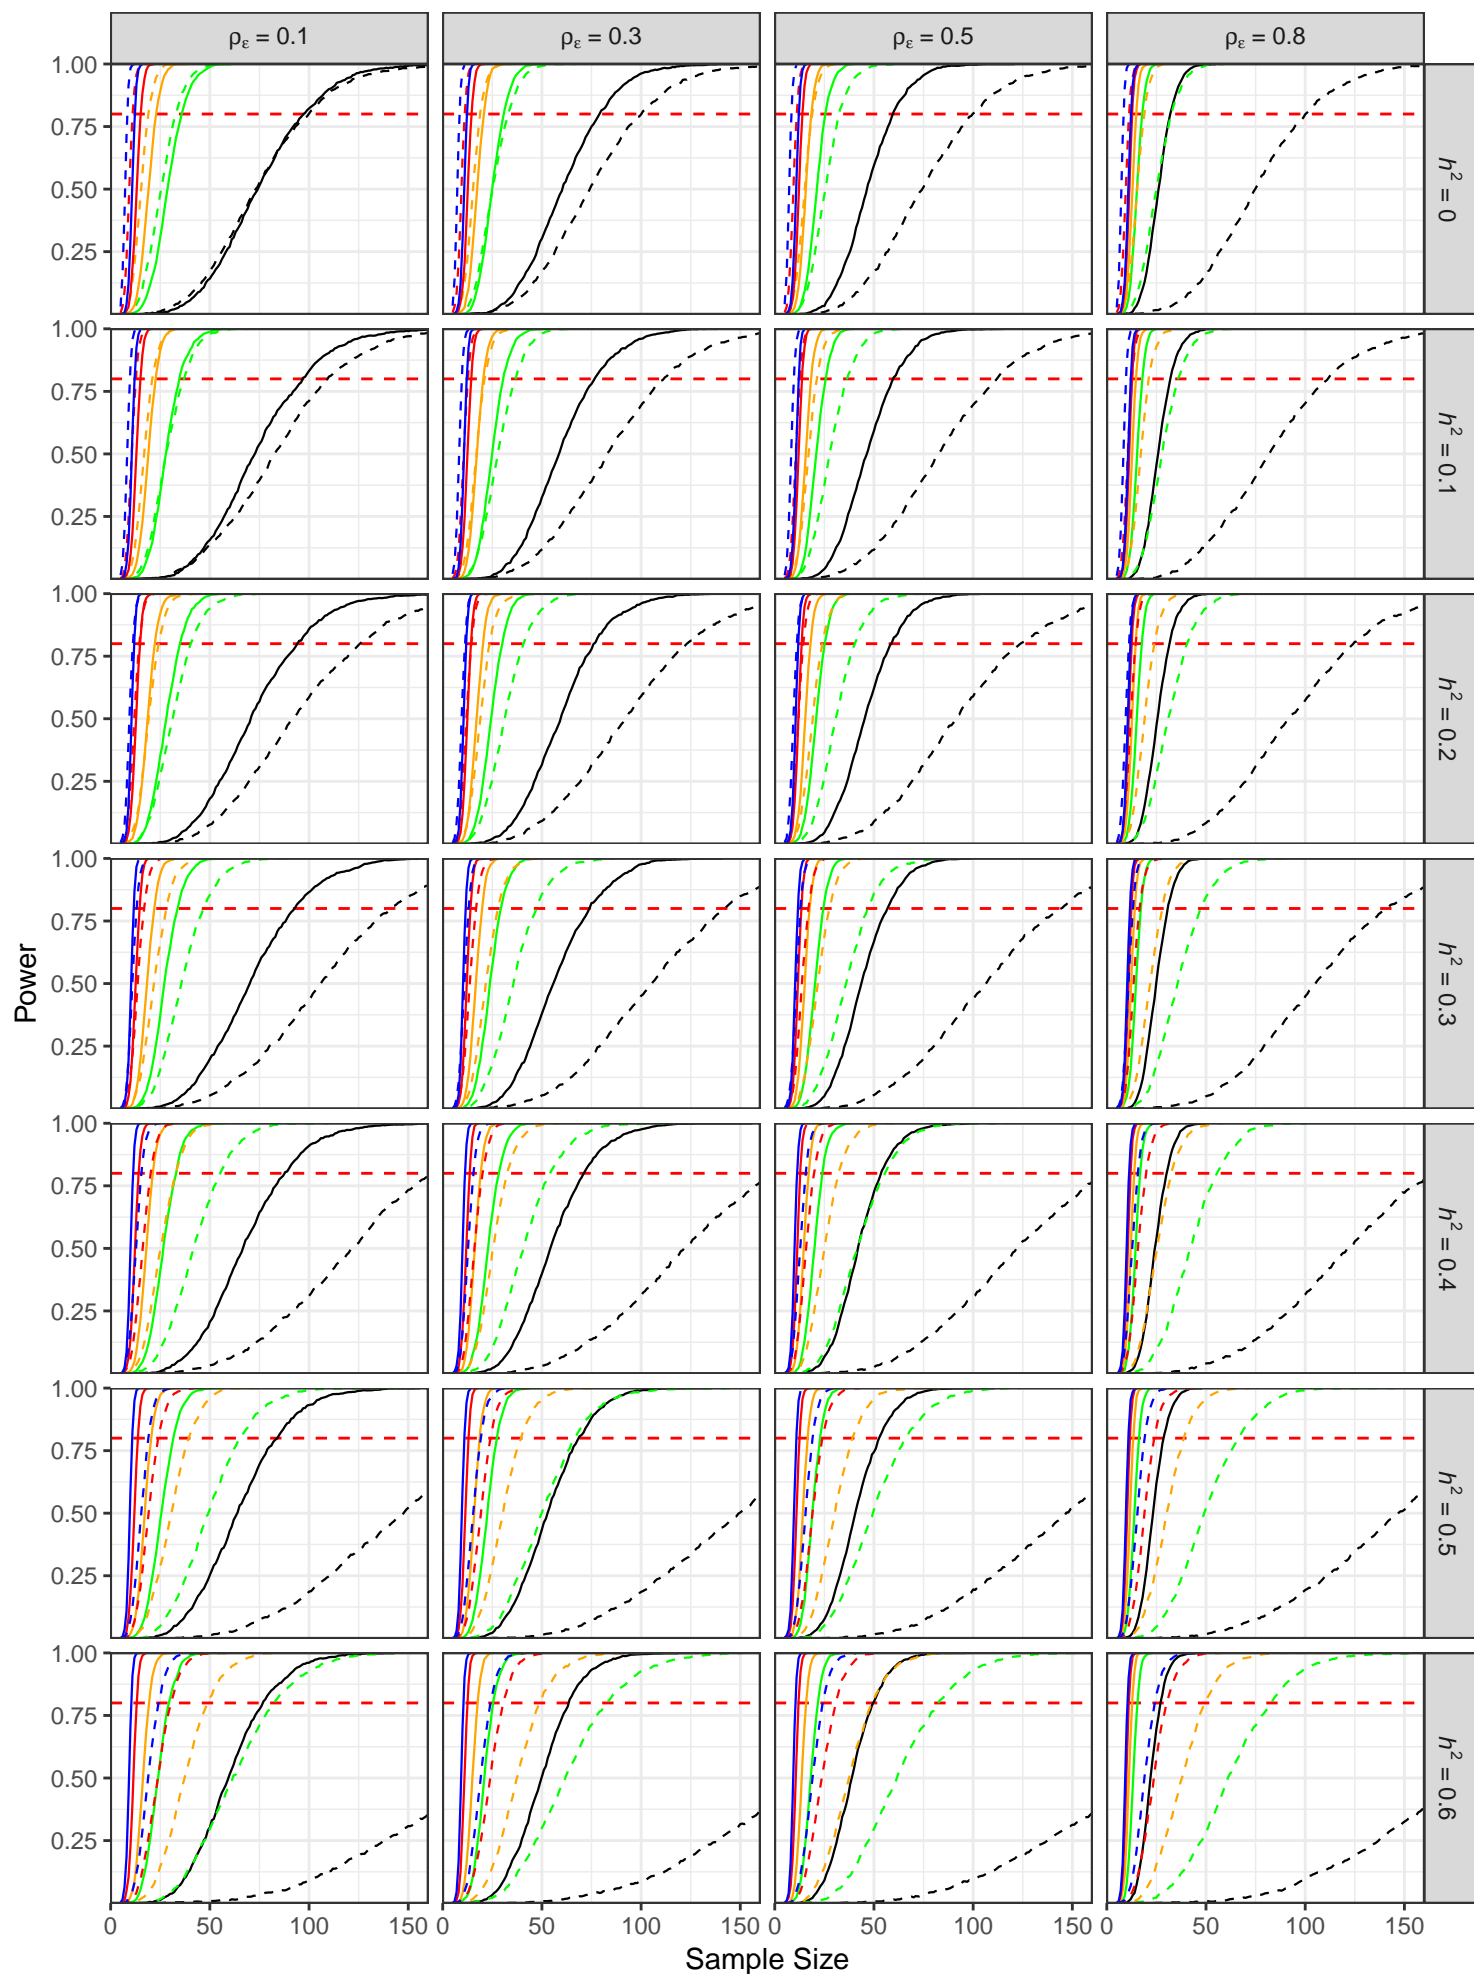



$P_K = 0.2$ ,  $E(M) = 3.36$ ,  $Var(M) = 3$

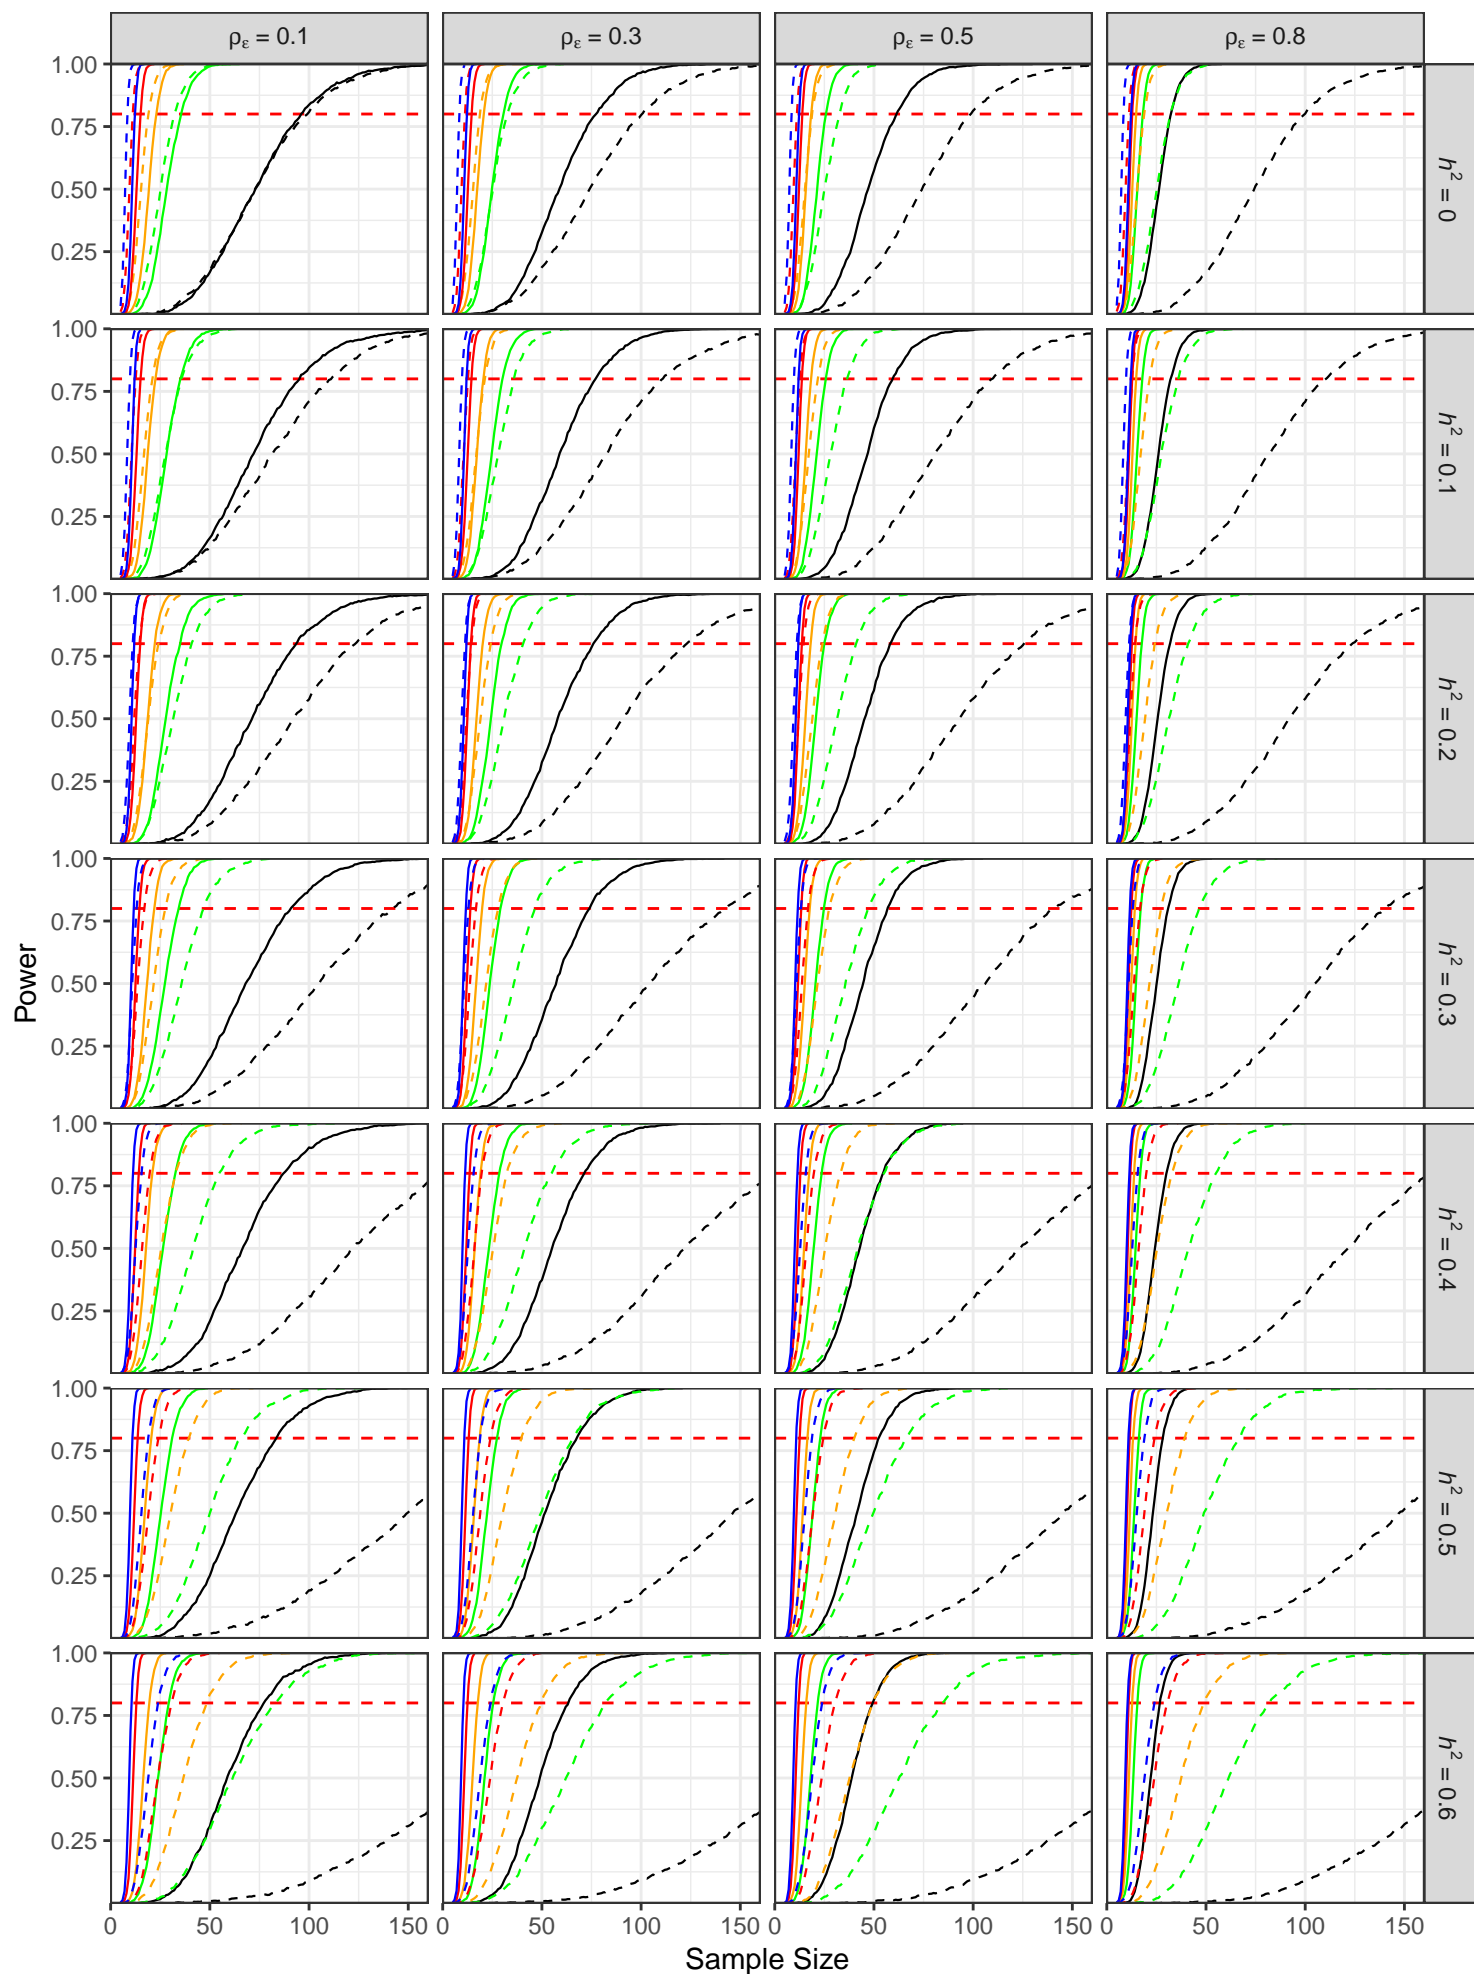

$P_K = 0.2$ ,  $E(M) = 3.36$ ,  $\text{Var}(M) = 4$

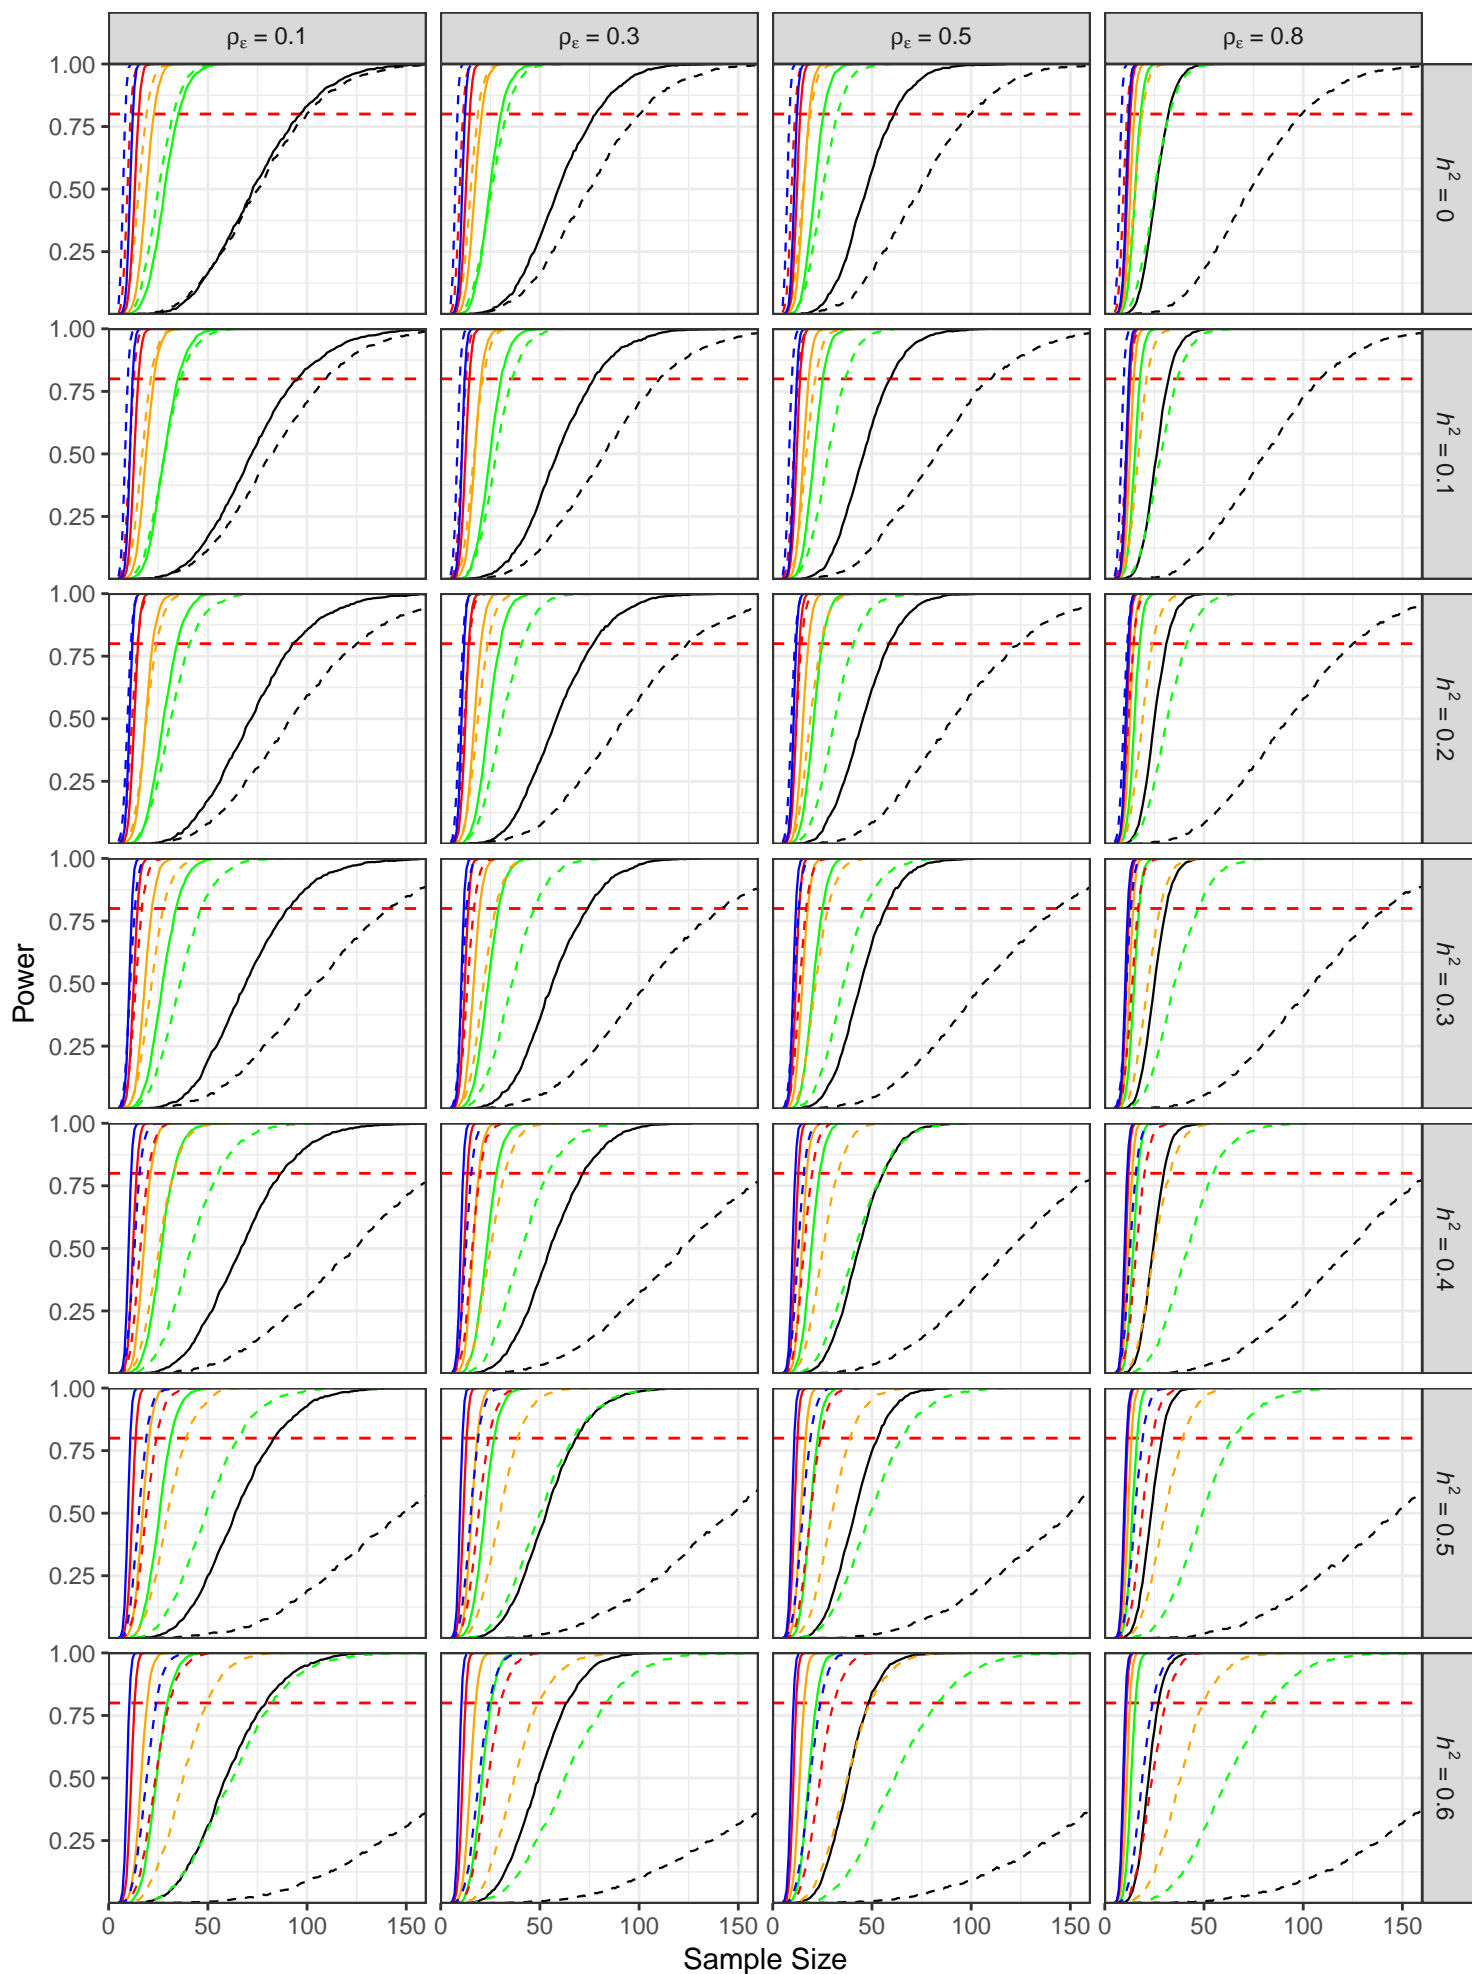

$P_K = 0.3$ ,  $E(M) = -3.78$ ,  $\text{Var}(M) = 0.06$

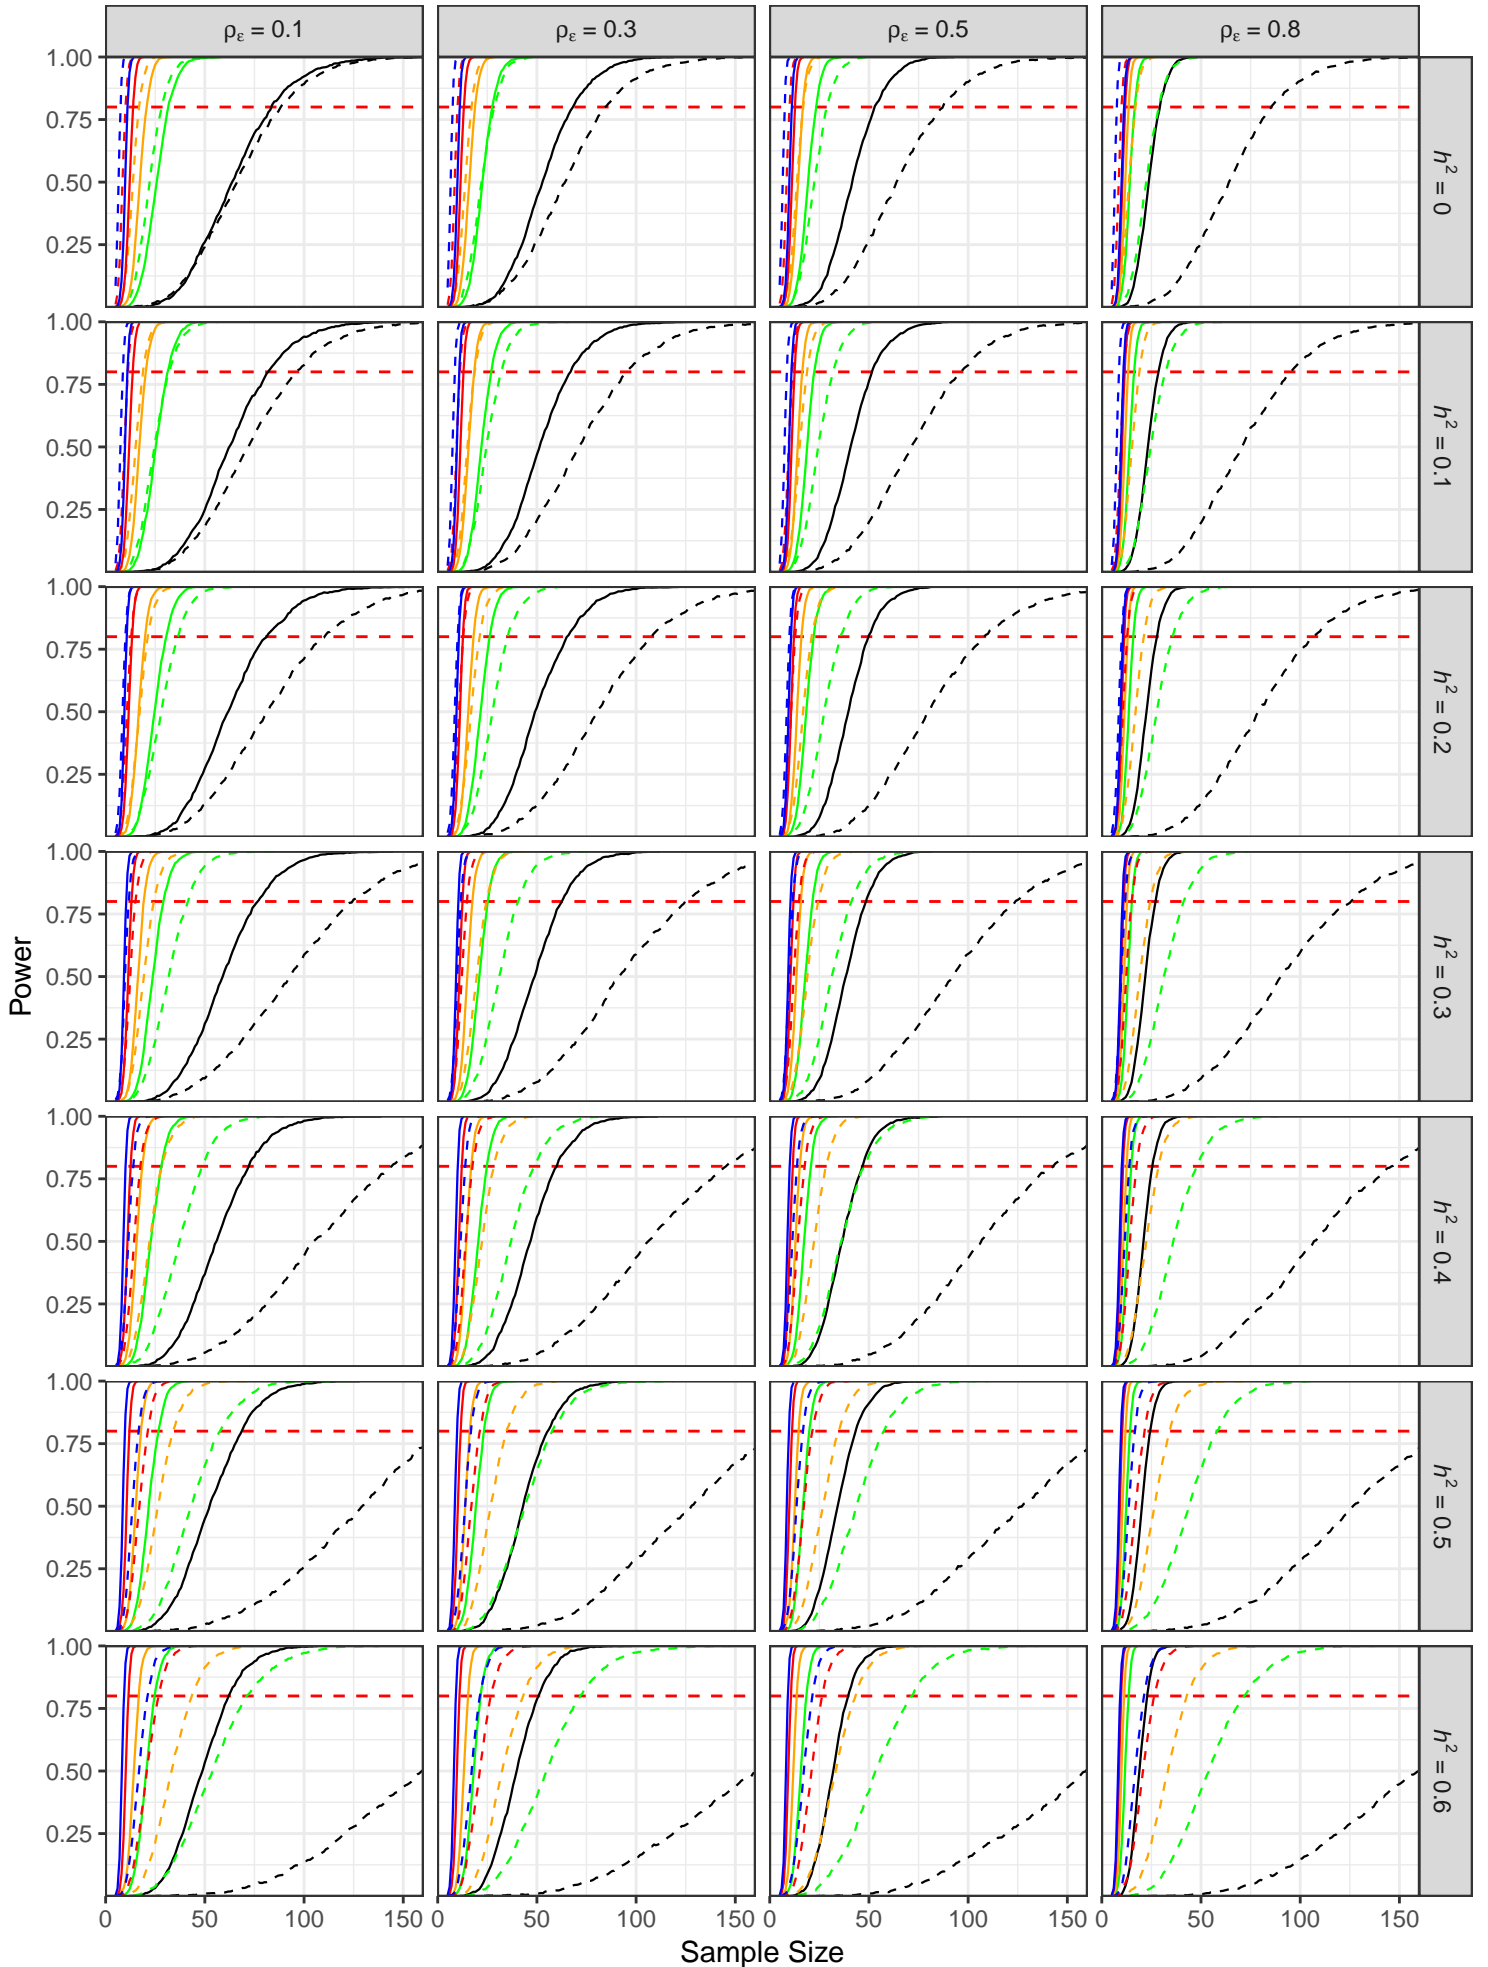

$R^2_{M,E}$  — 0.1 — 0.3 — 0.5 — 0.8 — 1

Design - - Ordinary Case-control — Discordant Twin

$P_K = 0.3$ ,  $E(M) = -3.78$ ,  $\text{Var}(M) = 1$

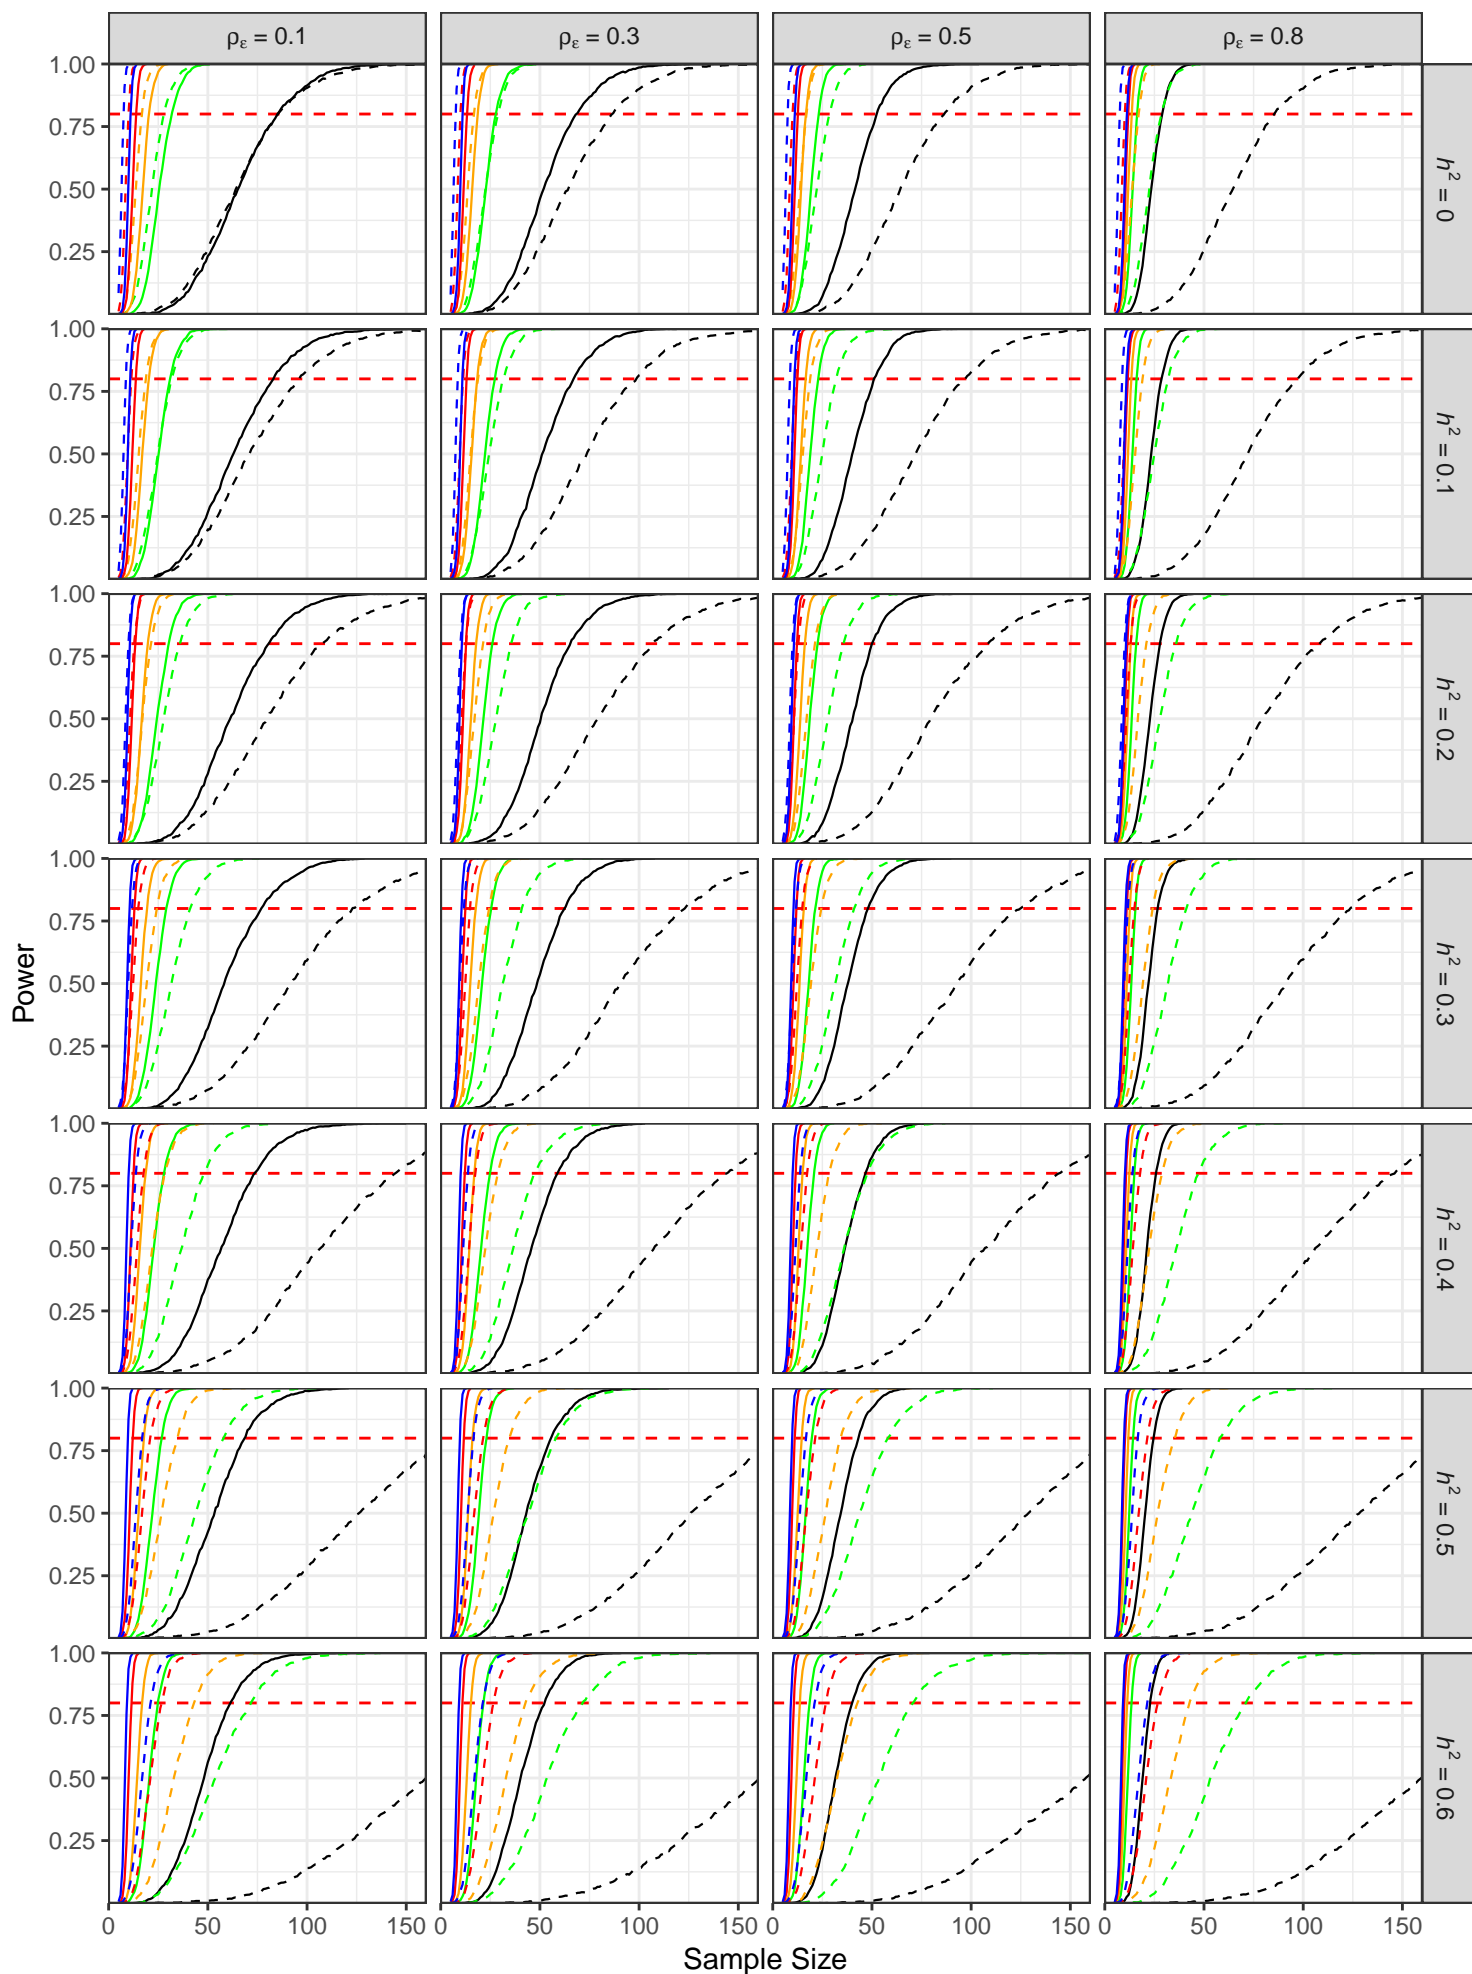

$P_K = 0.3$ ,  $E(M) = -3.78$ ,  $Var(M) = 2$

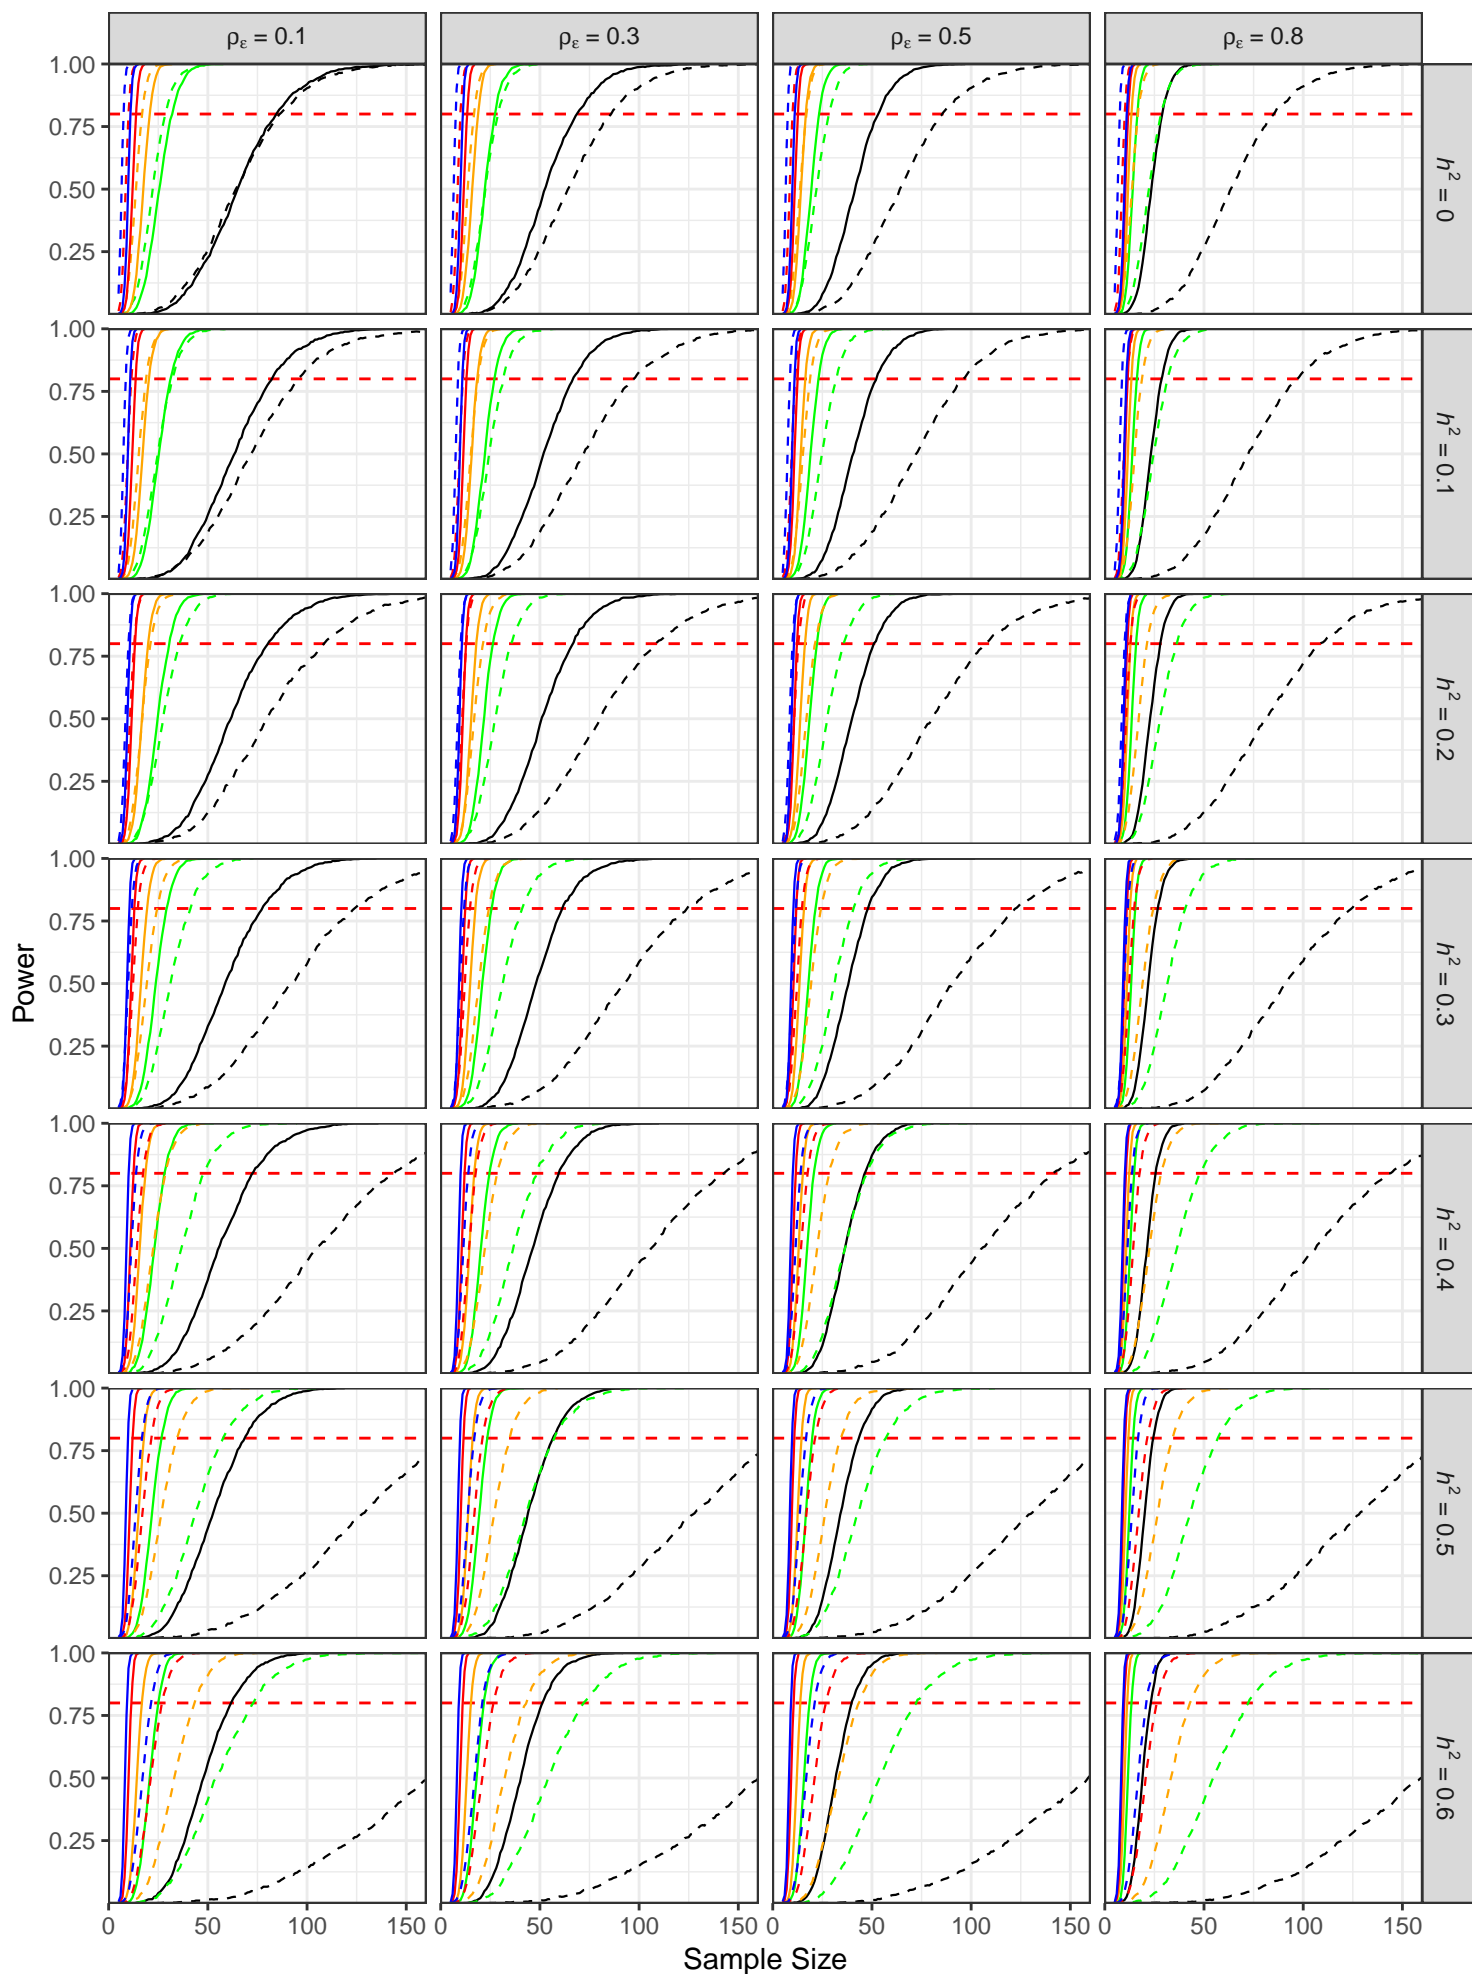



$P_K = 0.3$ ,  $E(M) = -3.78$ ,  $Var(M) = 3$

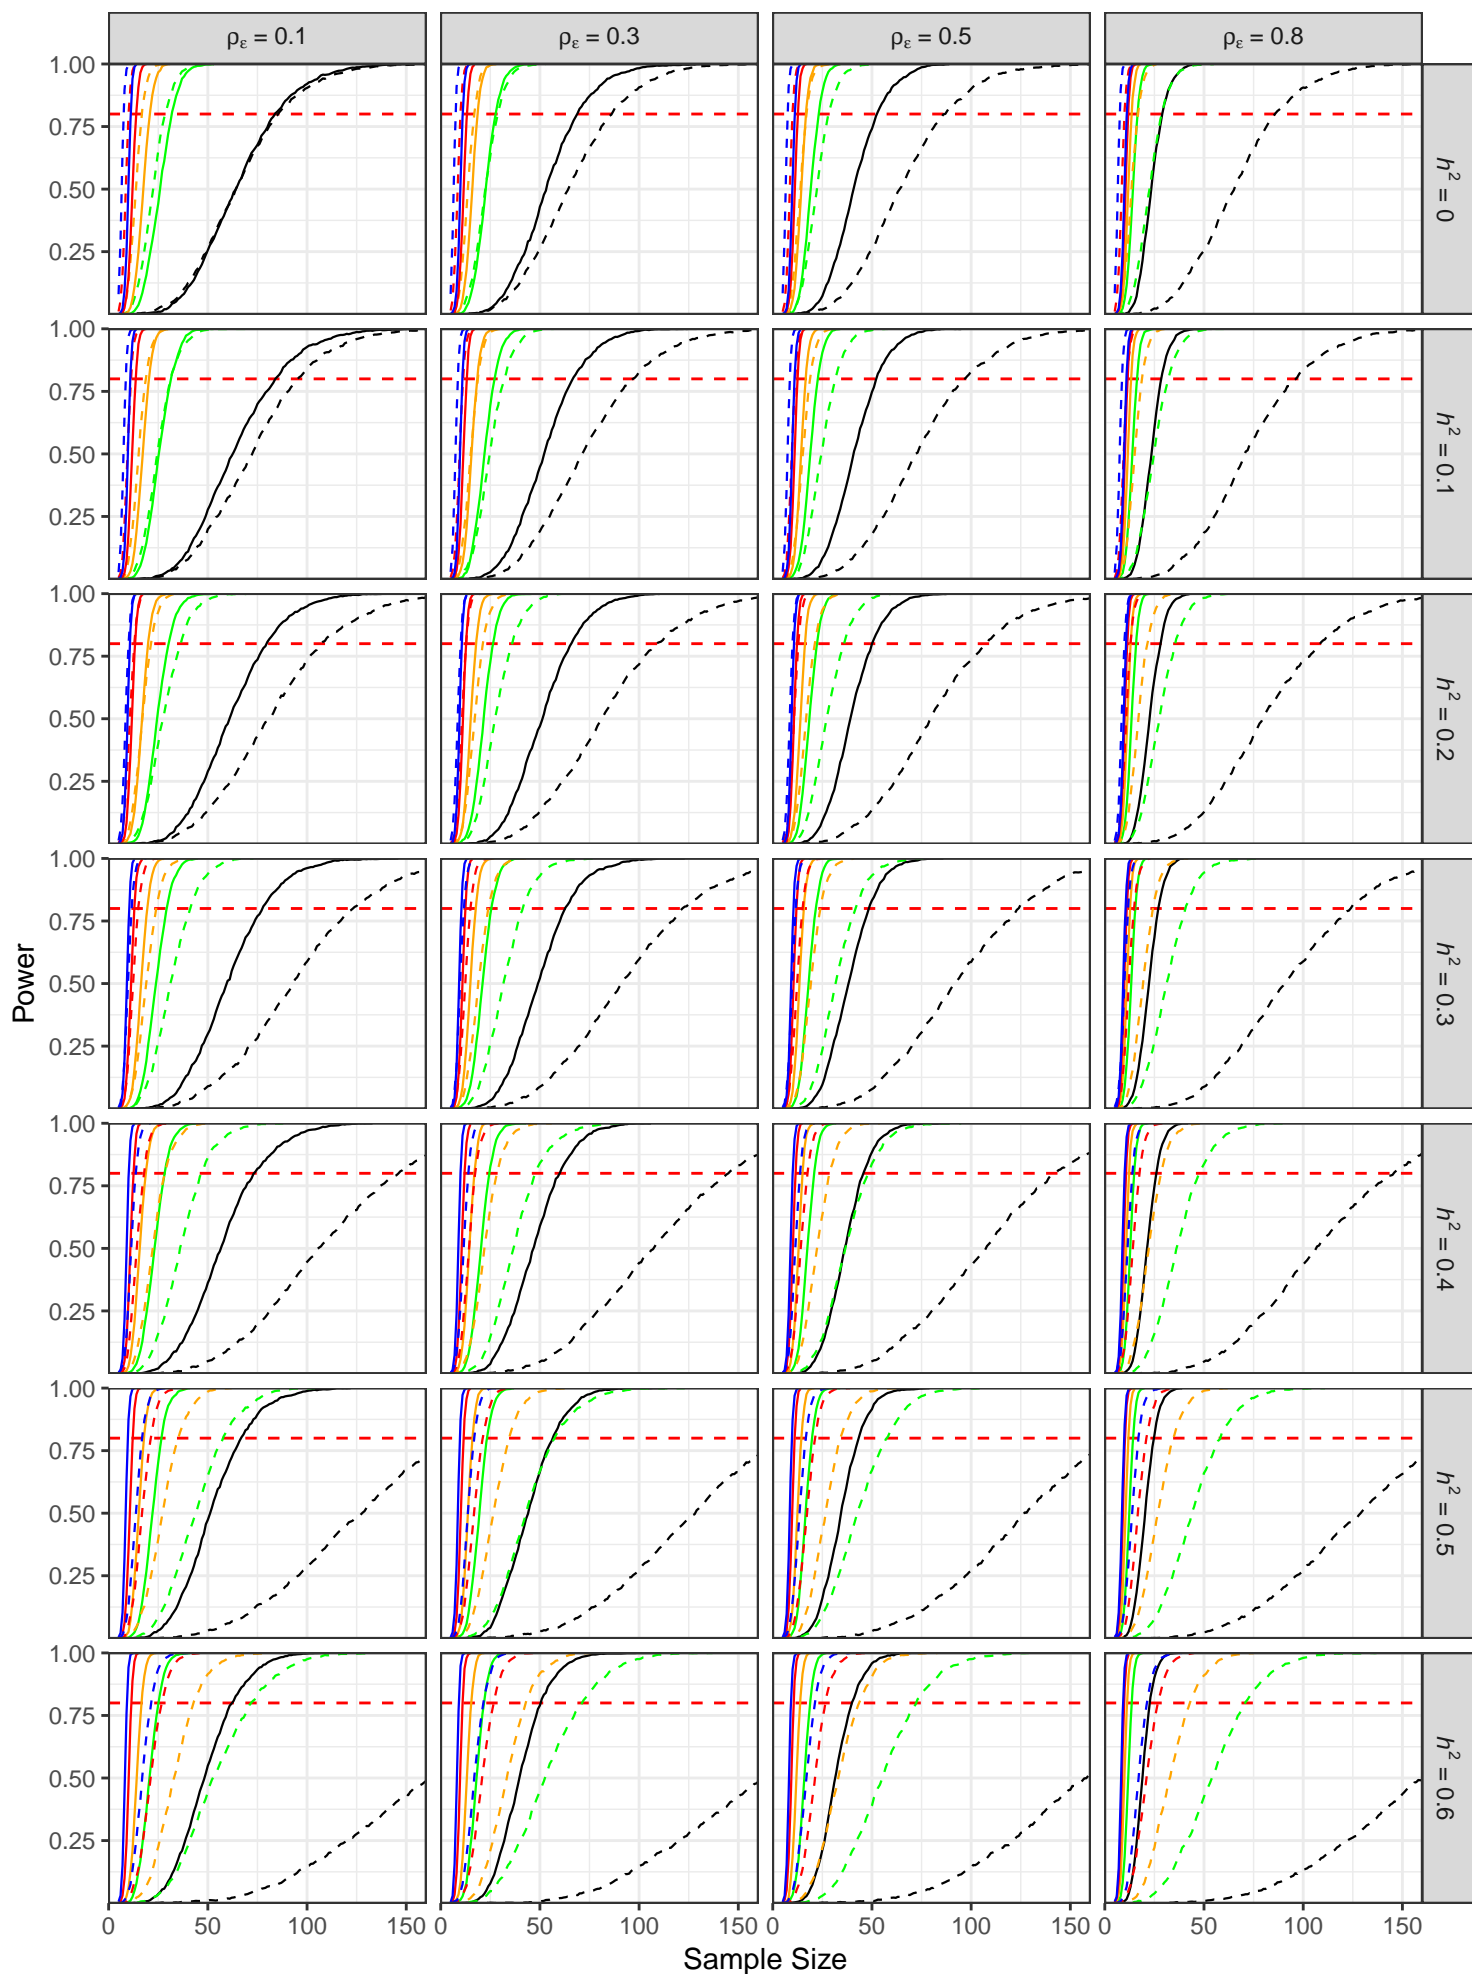

$P_K = 0.3$ ,  $E(M) = -3.78$ ,  $Var(M) = 4$

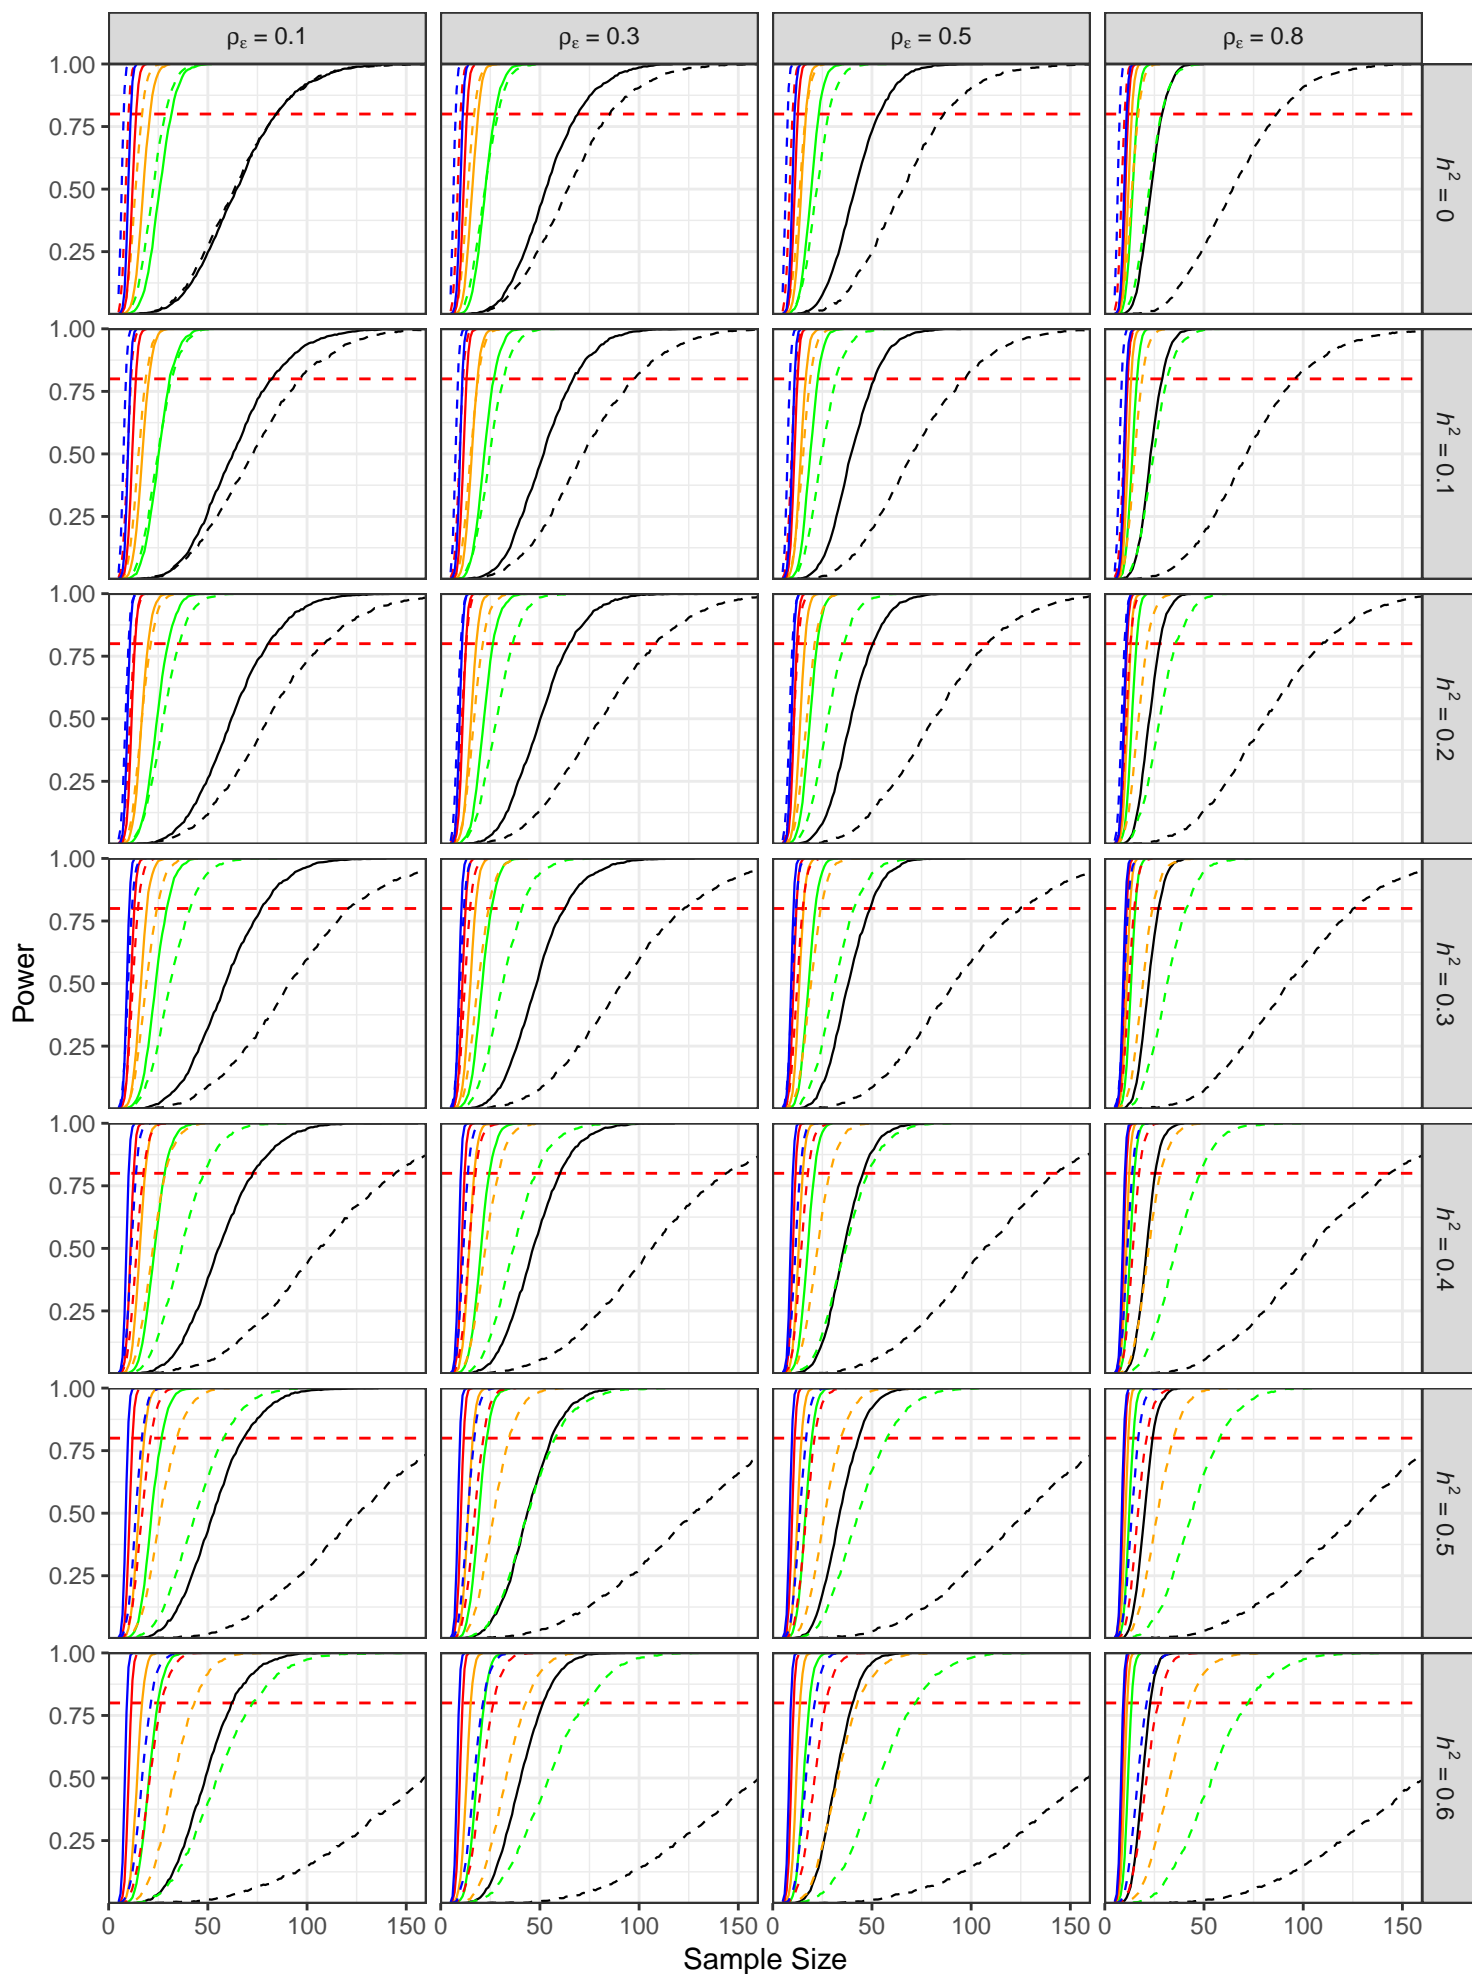

$P_K = 0.3$ ,  $E(M) = 3.36$ ,  $Var(M) = 0.06$

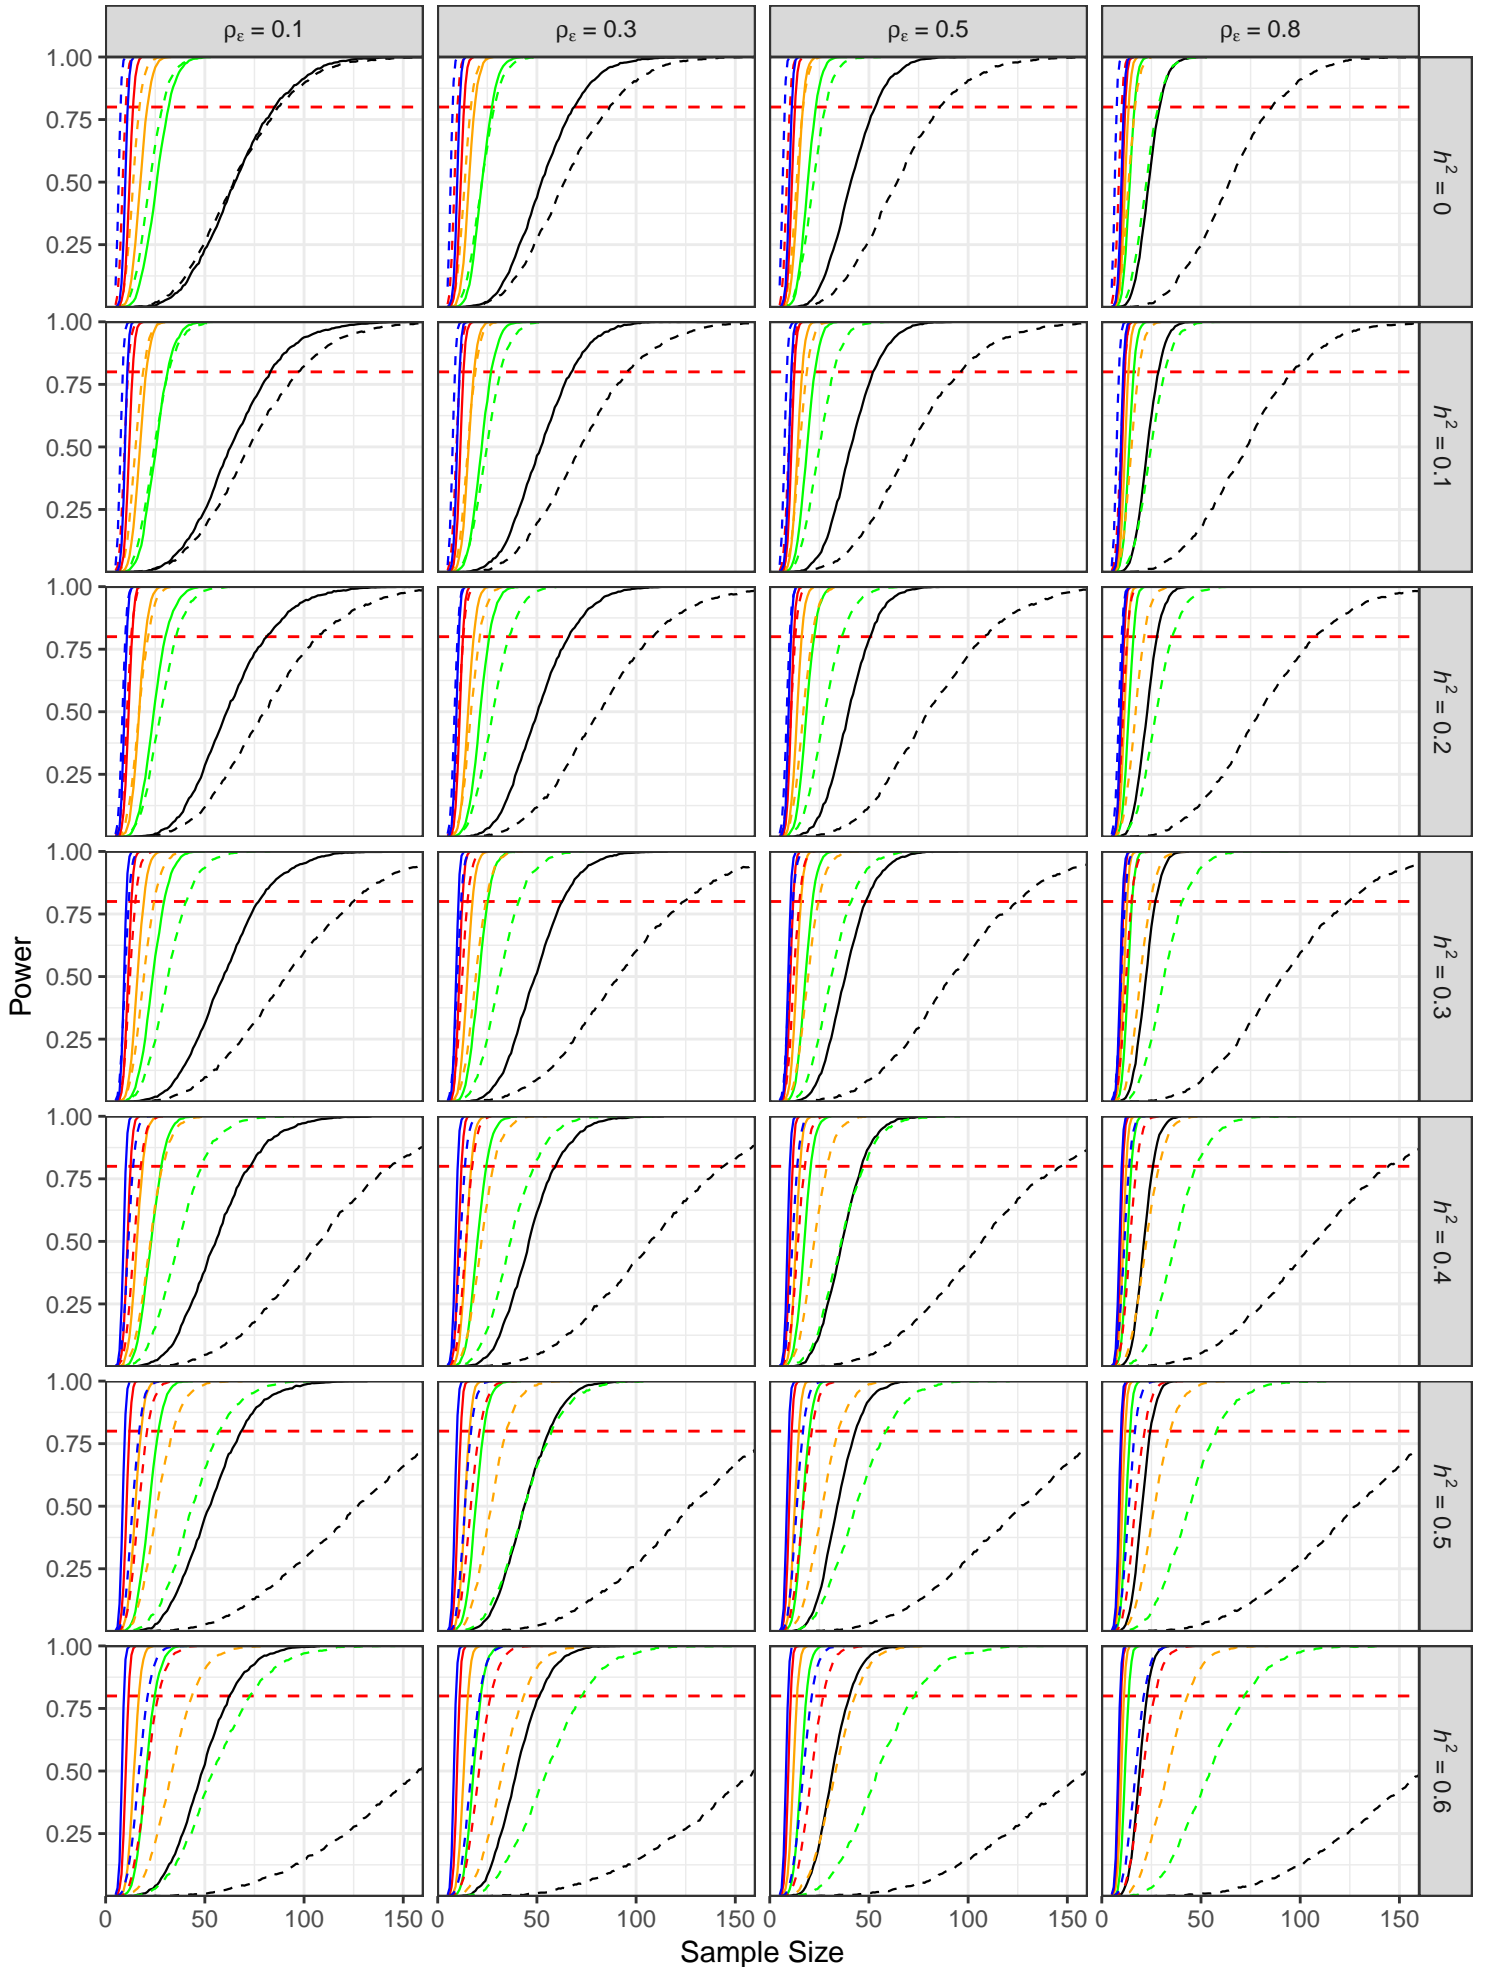

$P_K = 0.3$ ,  $E(M) = 3.36$ ,  $Var(M) = 1$

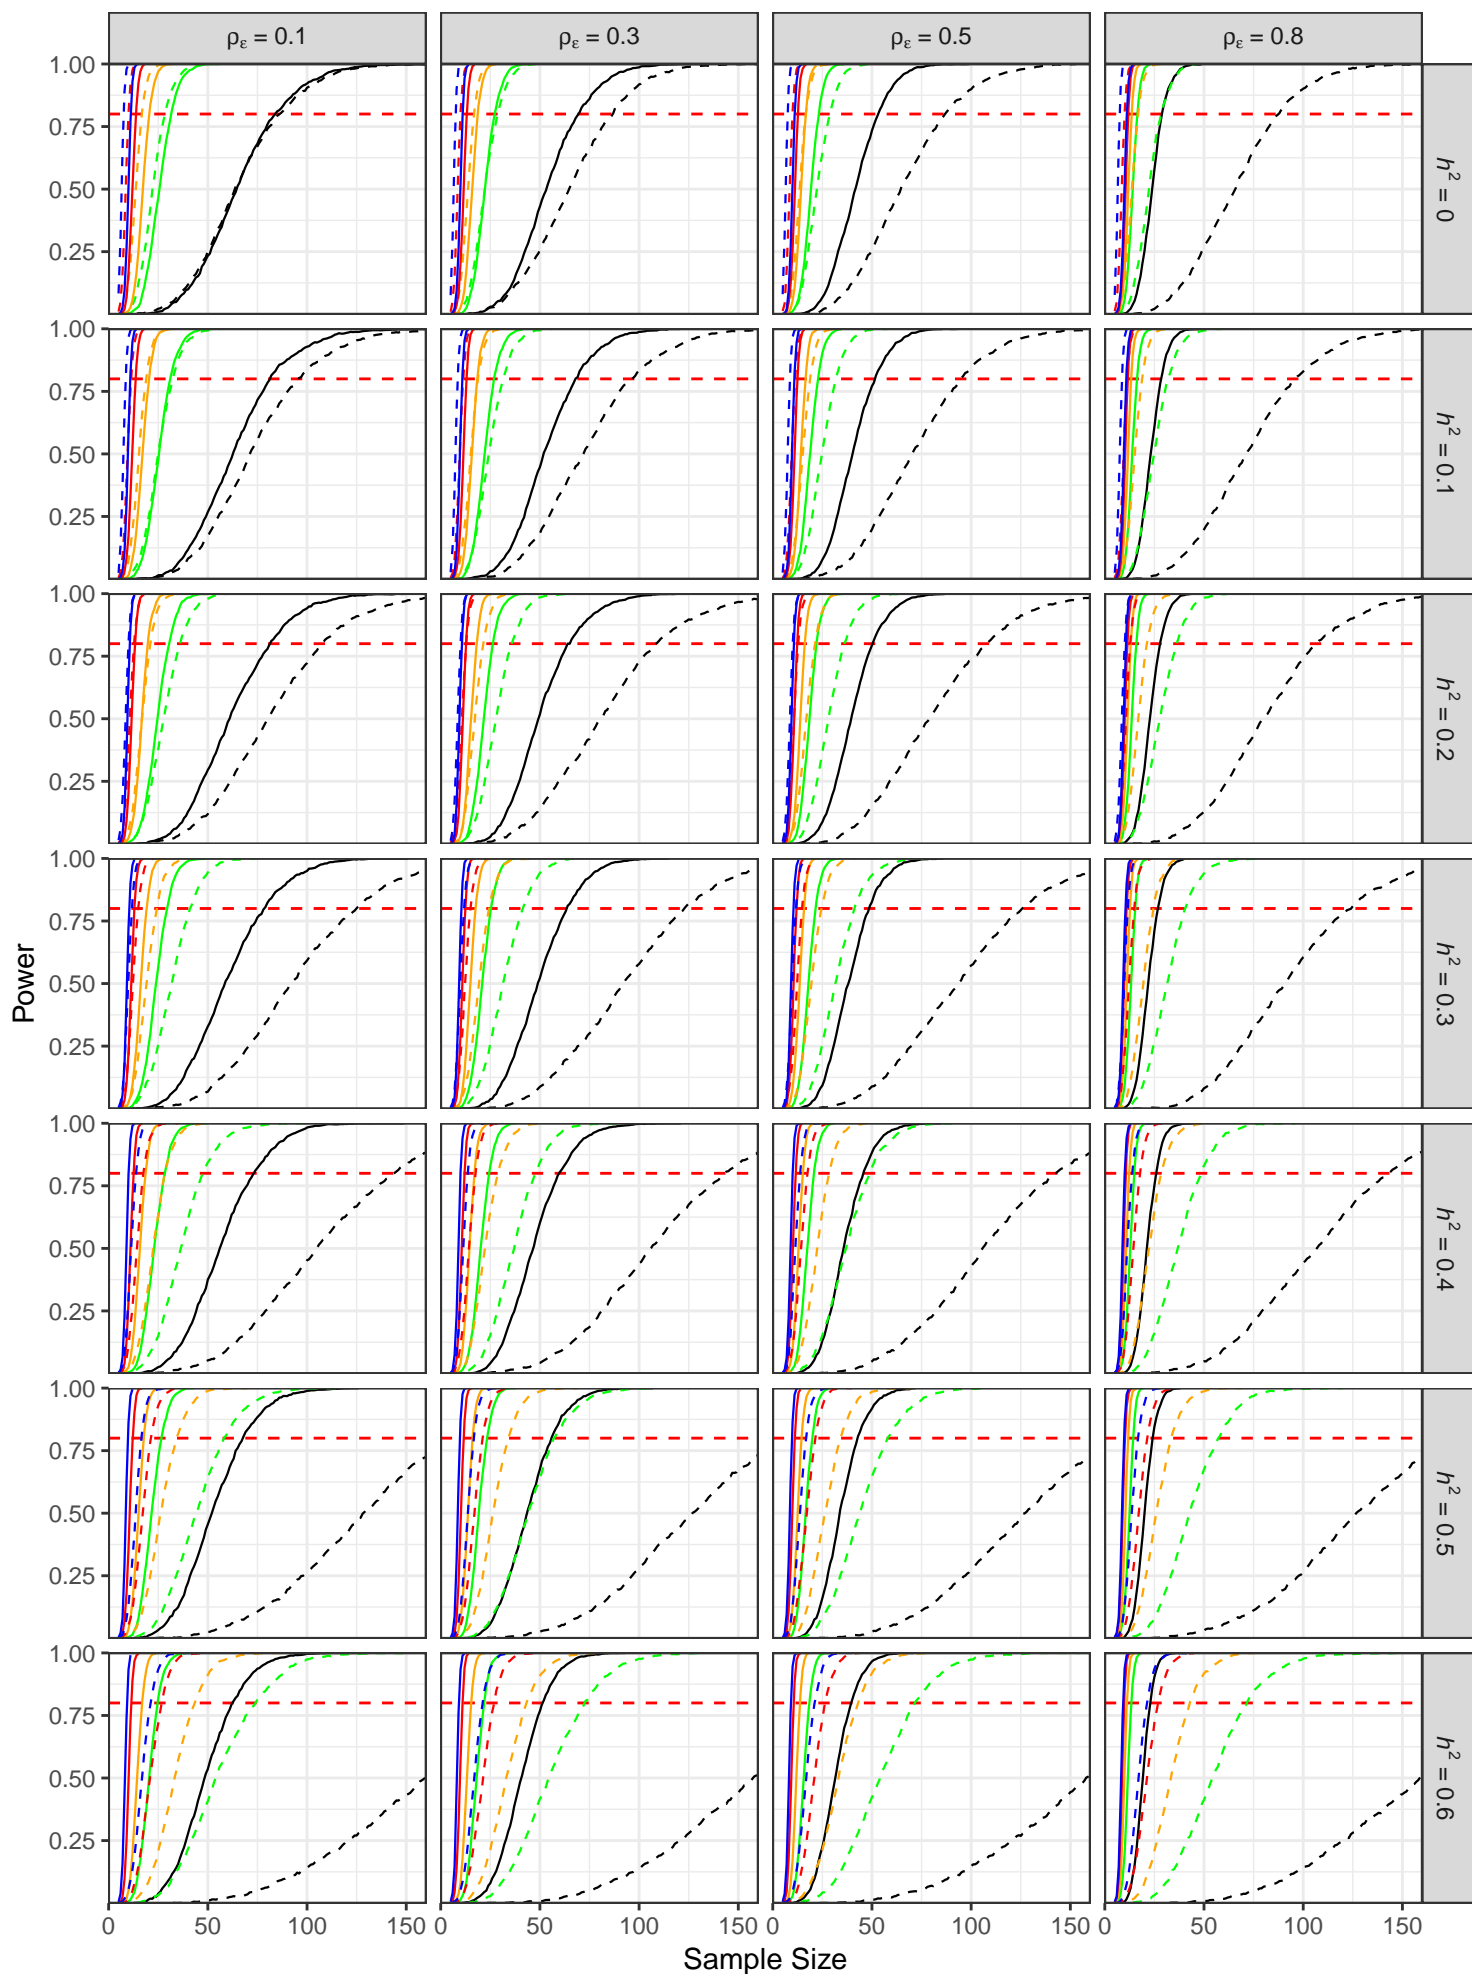

$R^2_{M,E}$  — 0.1 — 0.3 — 0.5 — 0.8 — 1

Design - - Ordinary Case-control — Discordant Twin

$P_K = 0.3$ ,  $E(M) = 3.36$ ,  $Var(M) = 2$

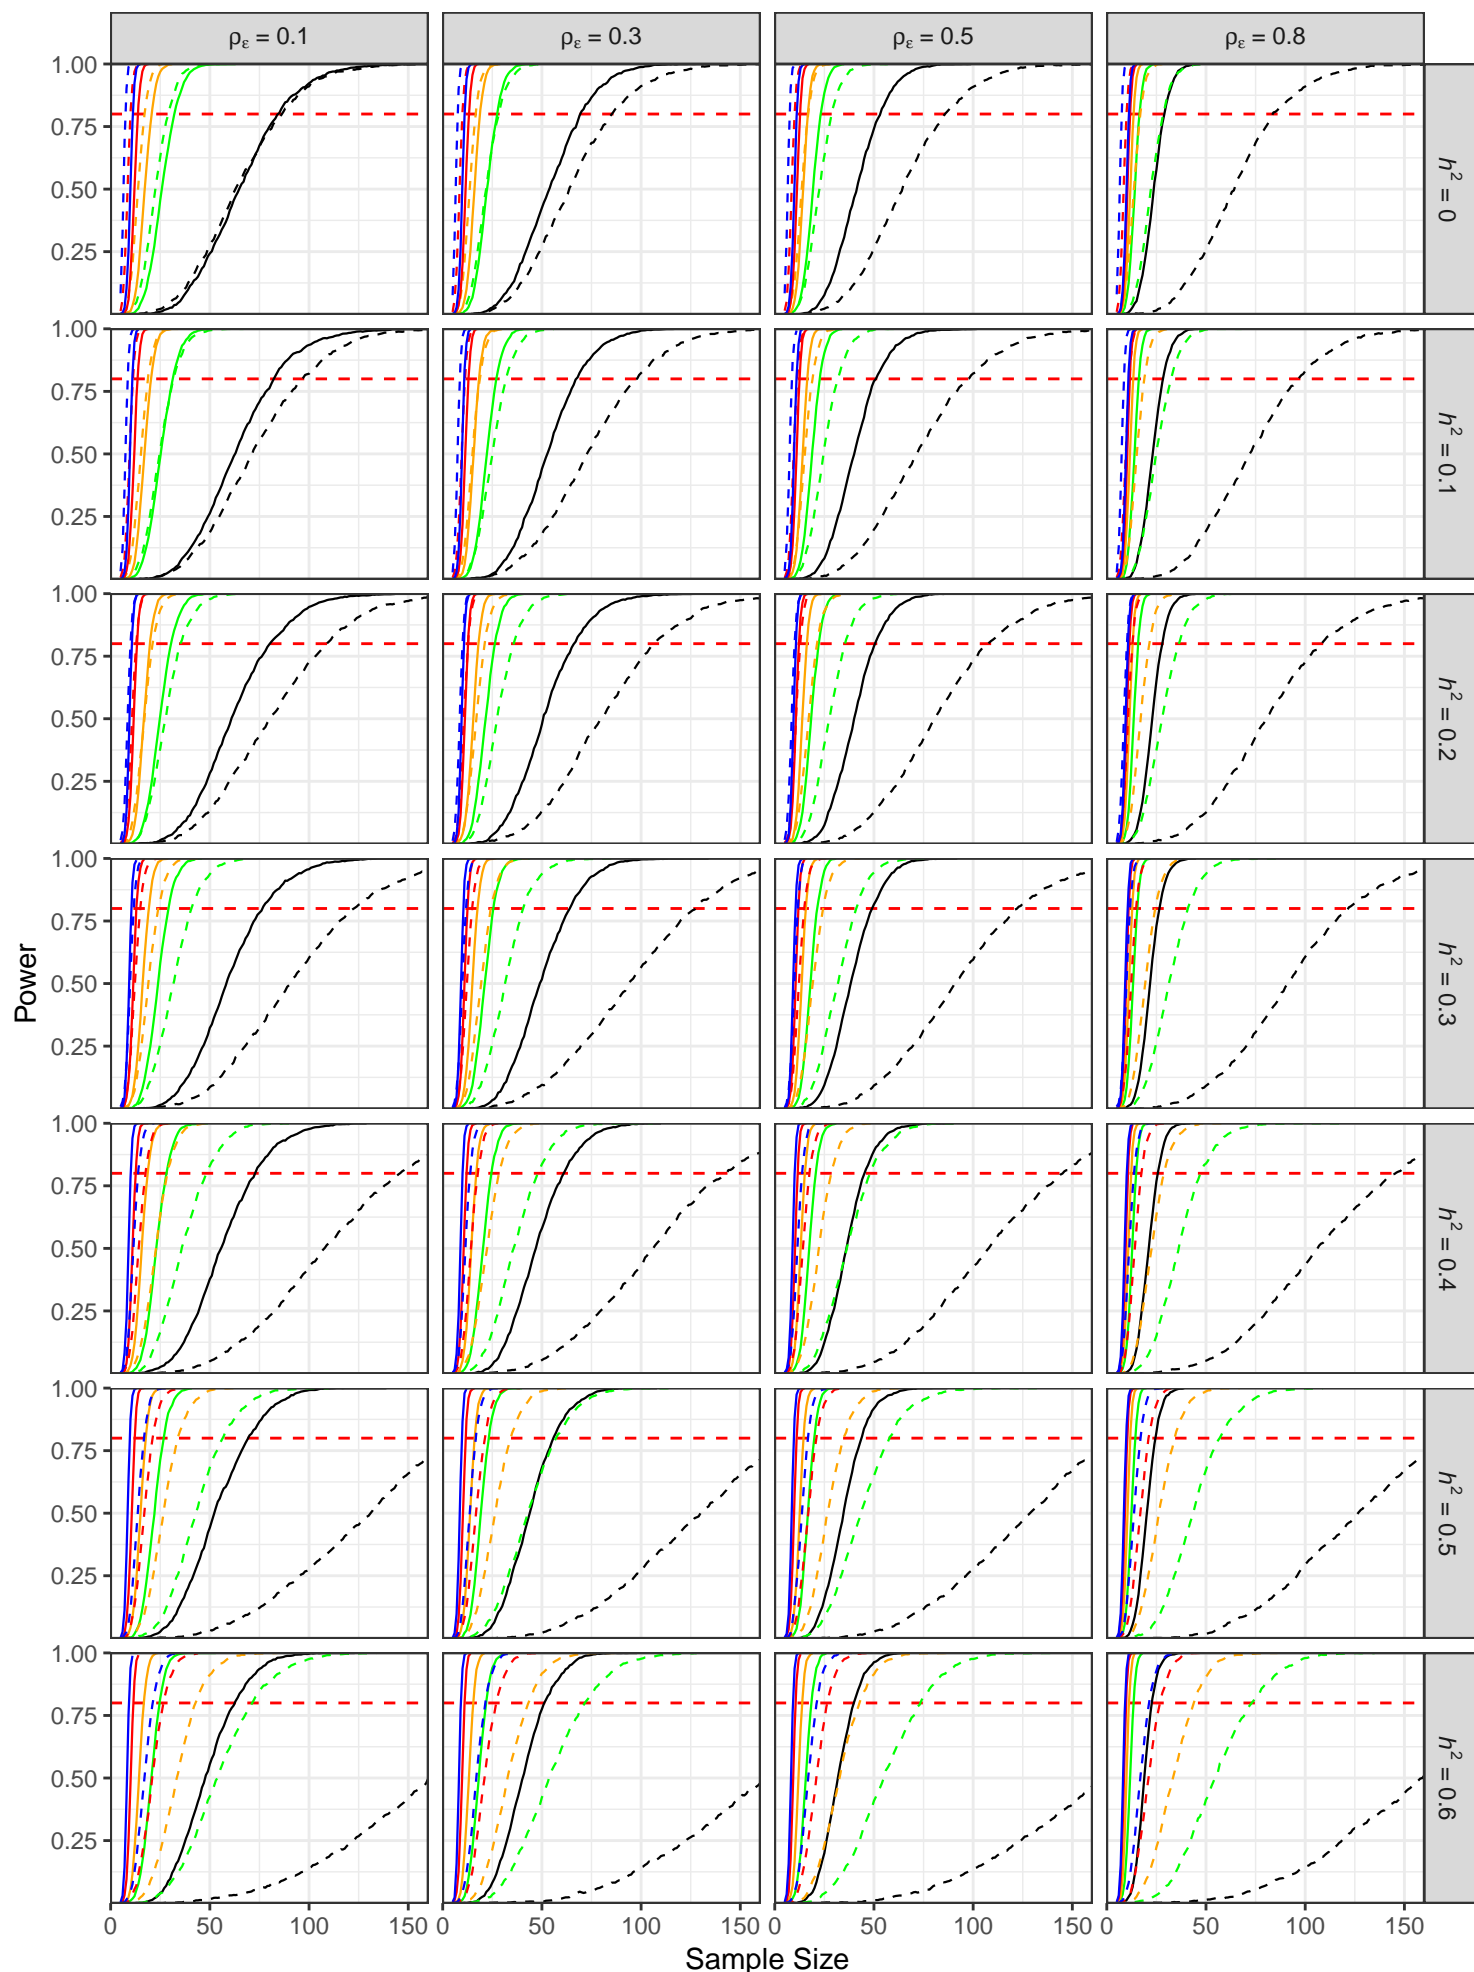

$R^2_{M,E}$  — 0.1 — 0.3 — 0.5 — 0.8 — 1

Design - - Ordinary Case-control — Discordant Twin



$P_K = 0.3$ ,  $E(M) = 3.36$ ,  $Var(M) = 3$

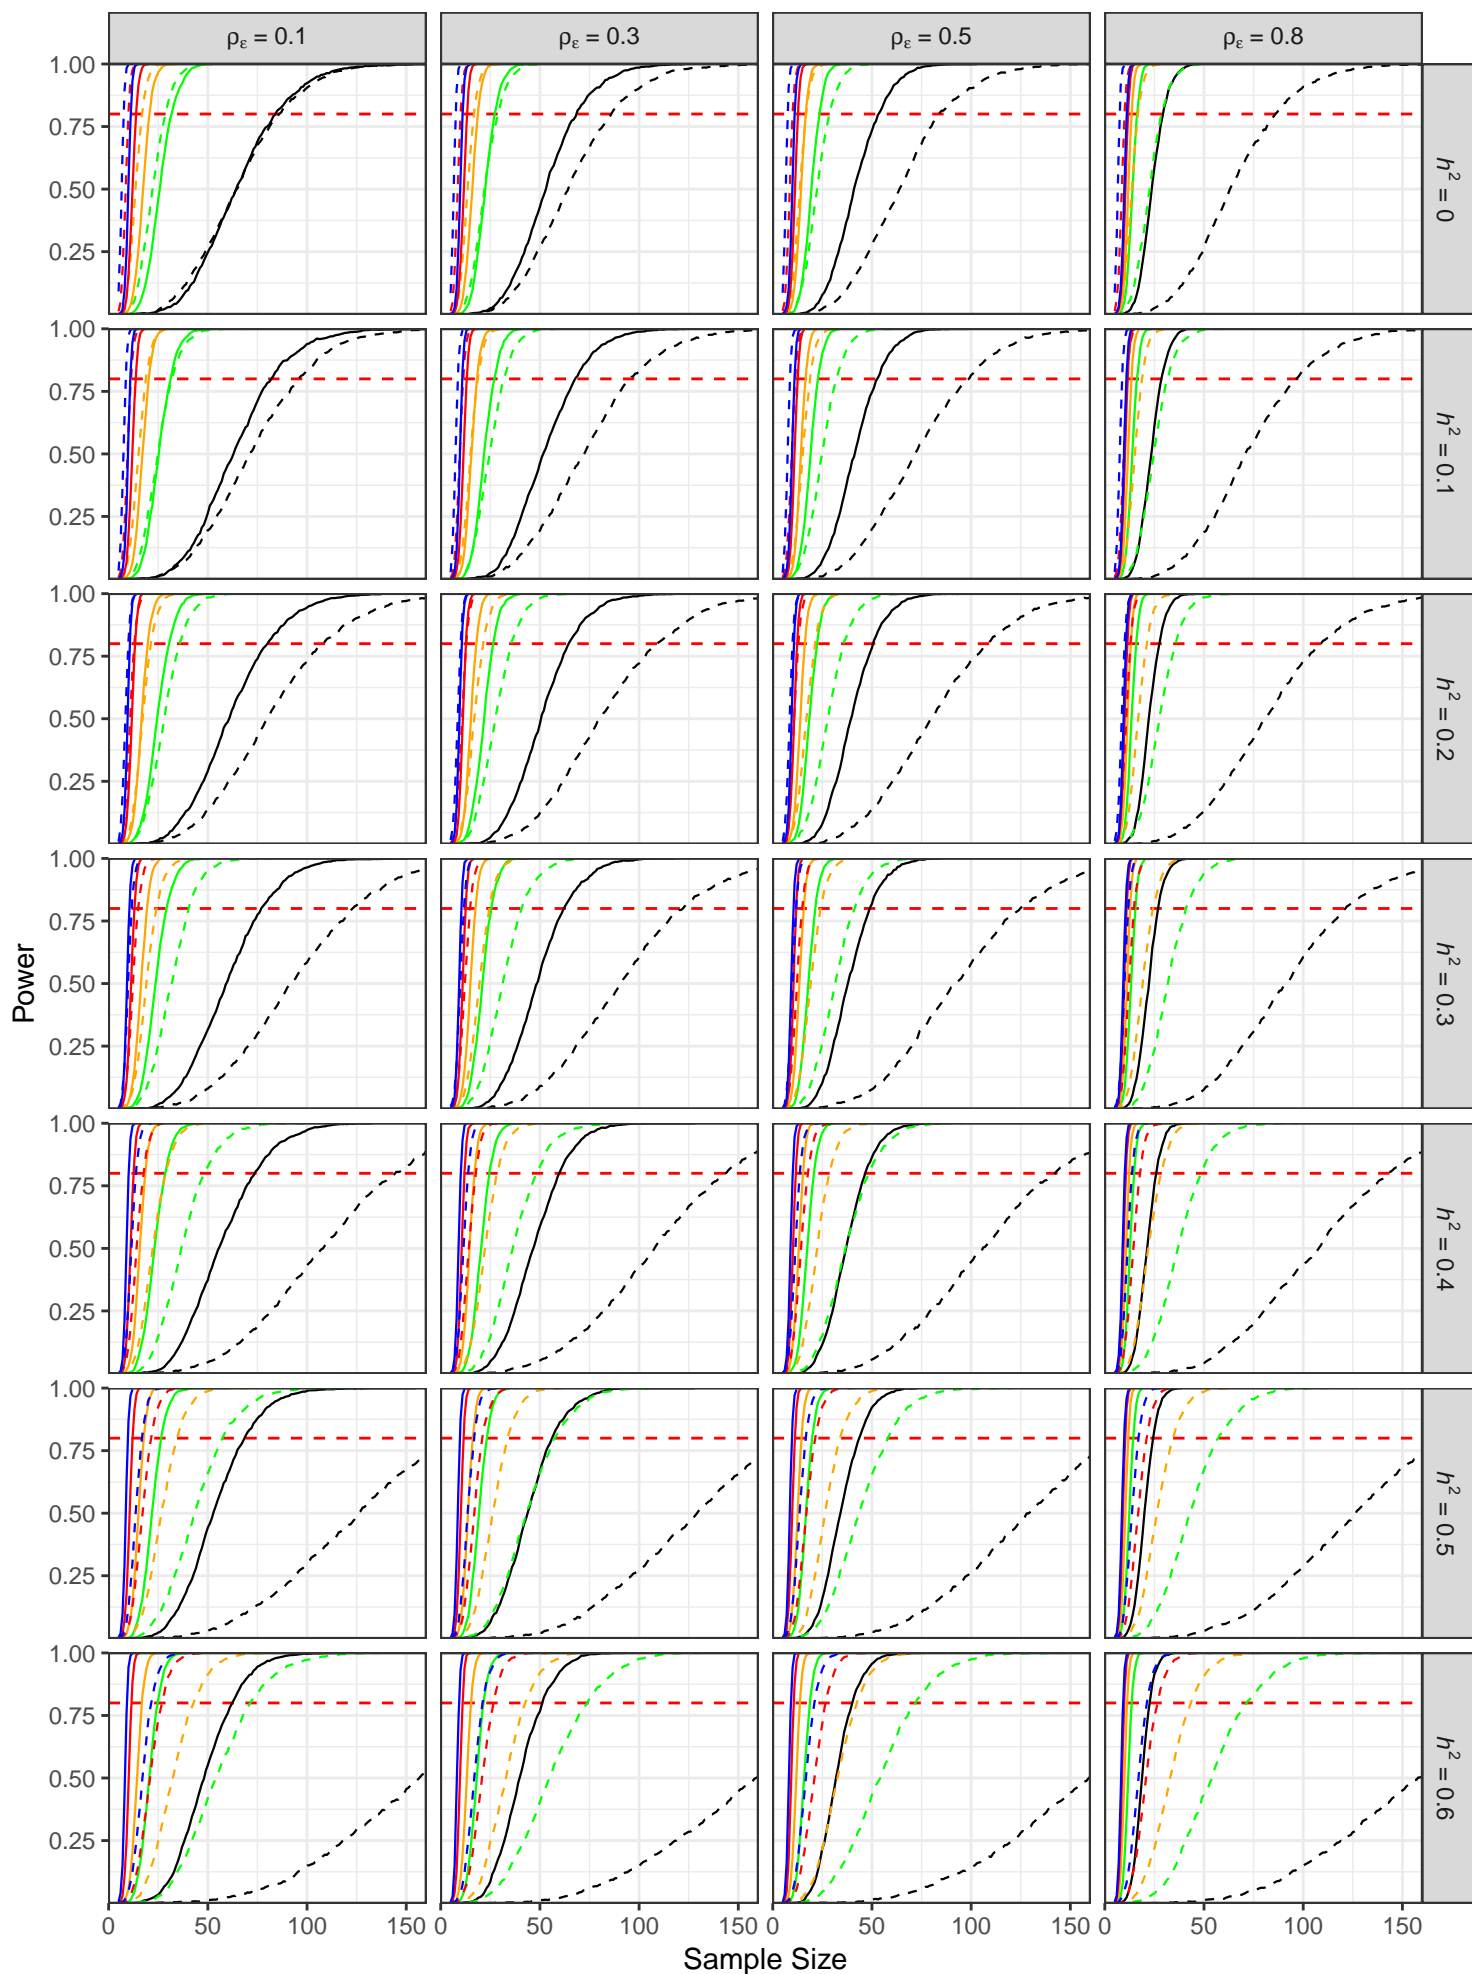

$R^2_{M,E}$  — 0.1 — 0.3 — 0.5 — 0.8 — 1

Design - - Ordinary Case-control — Discordant Twin

$P_K = 0.3$ ,  $E(M) = 3.36$ ,  $Var(M) = 4$

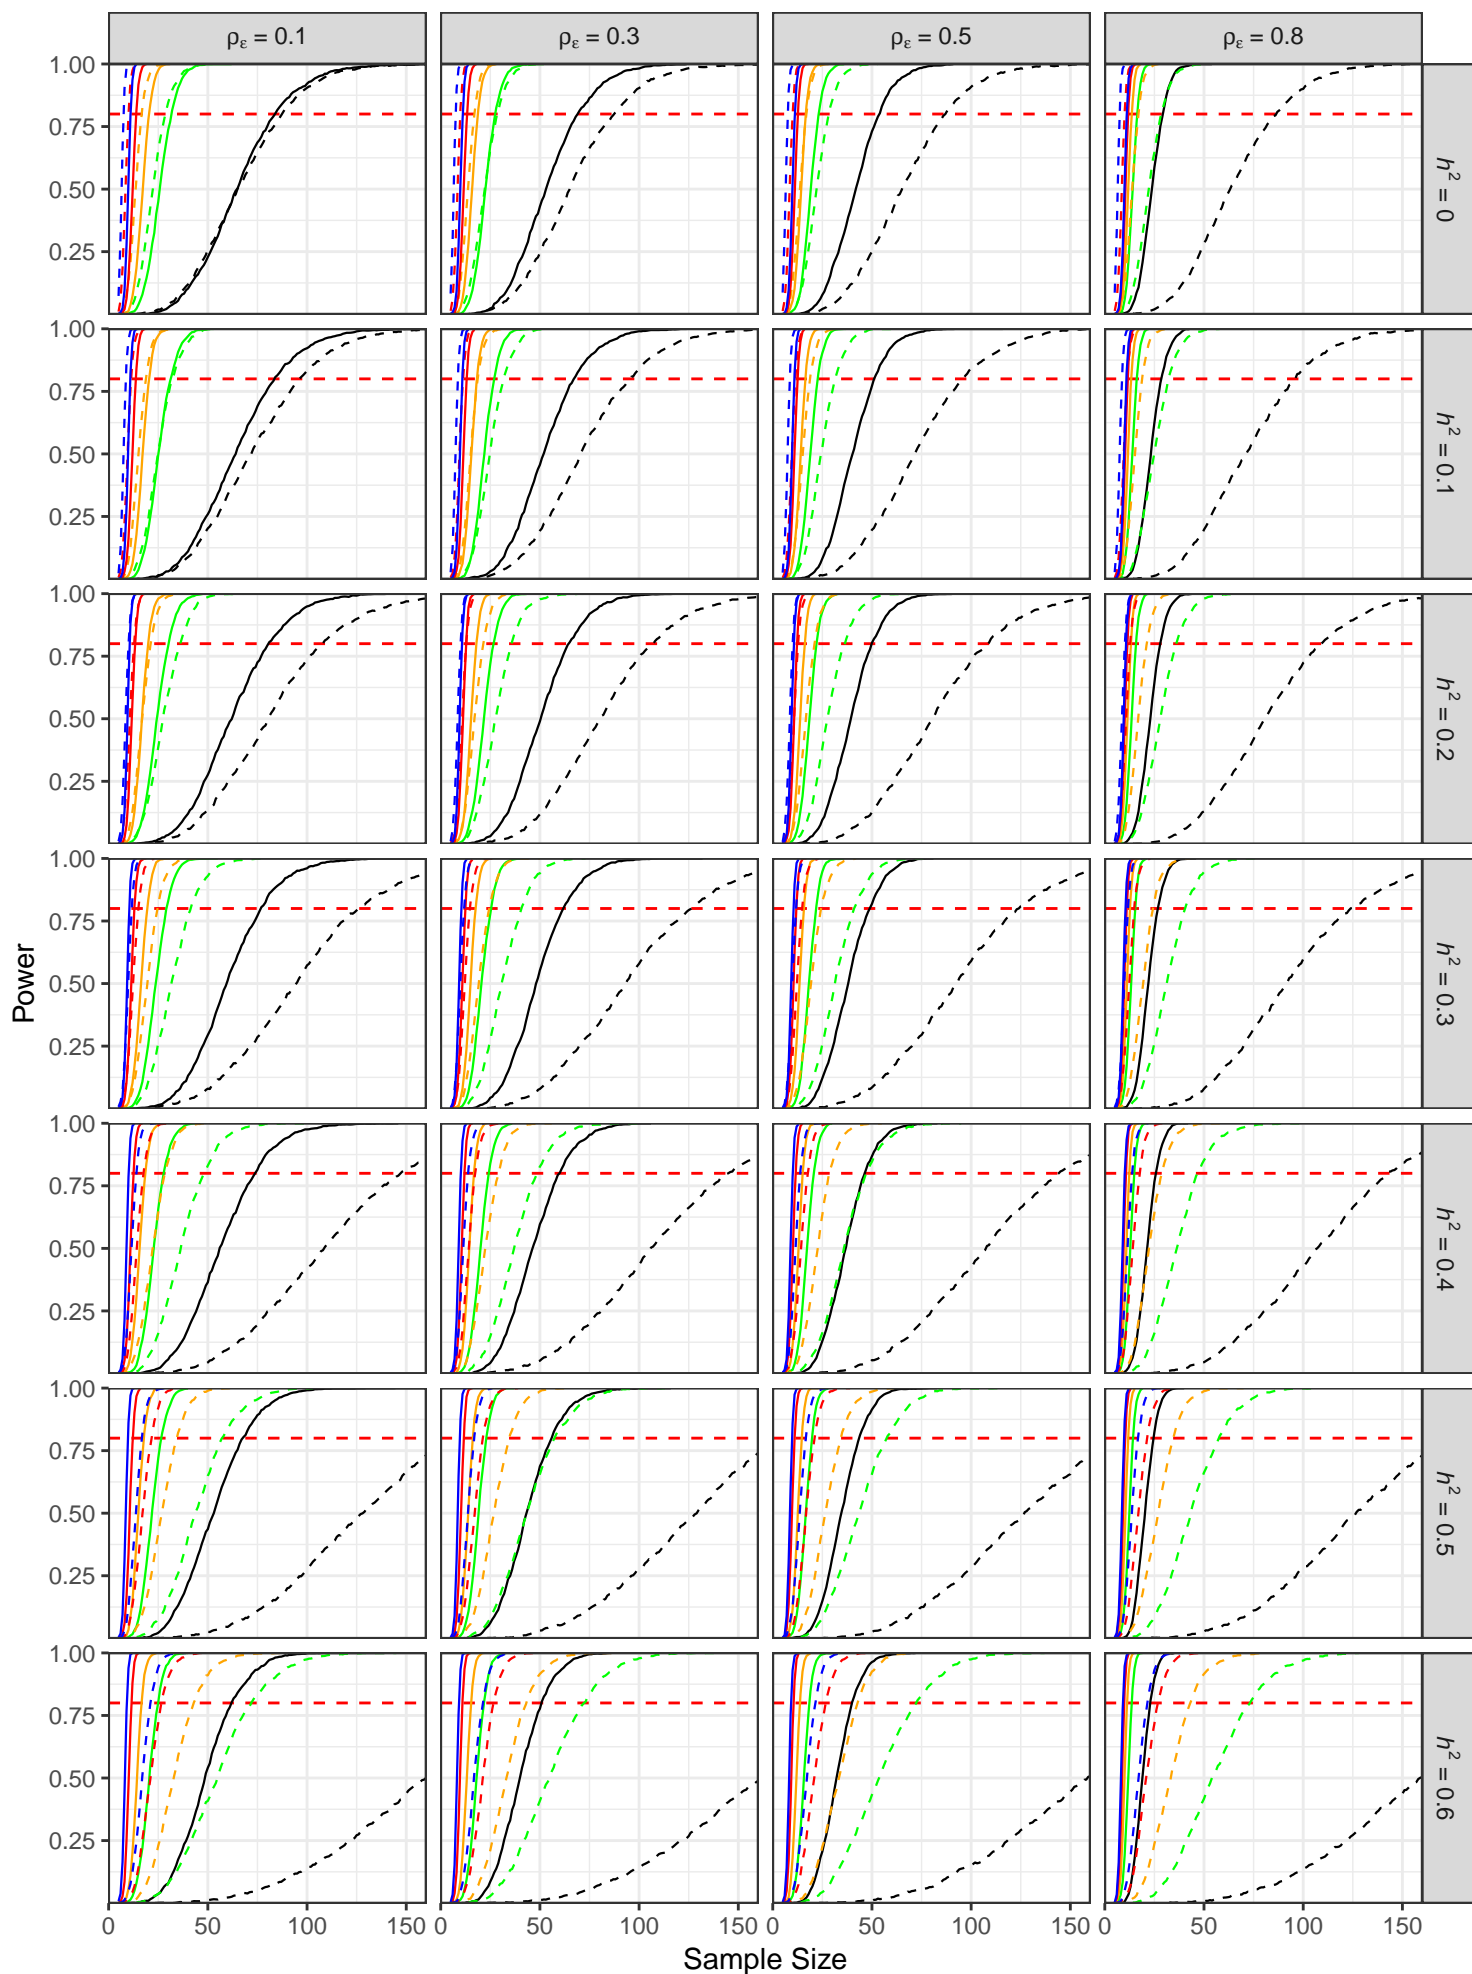

$P_K = 0.4$ ,  $E(M) = -3.78$ ,  $\text{Var}(M) = 0.06$

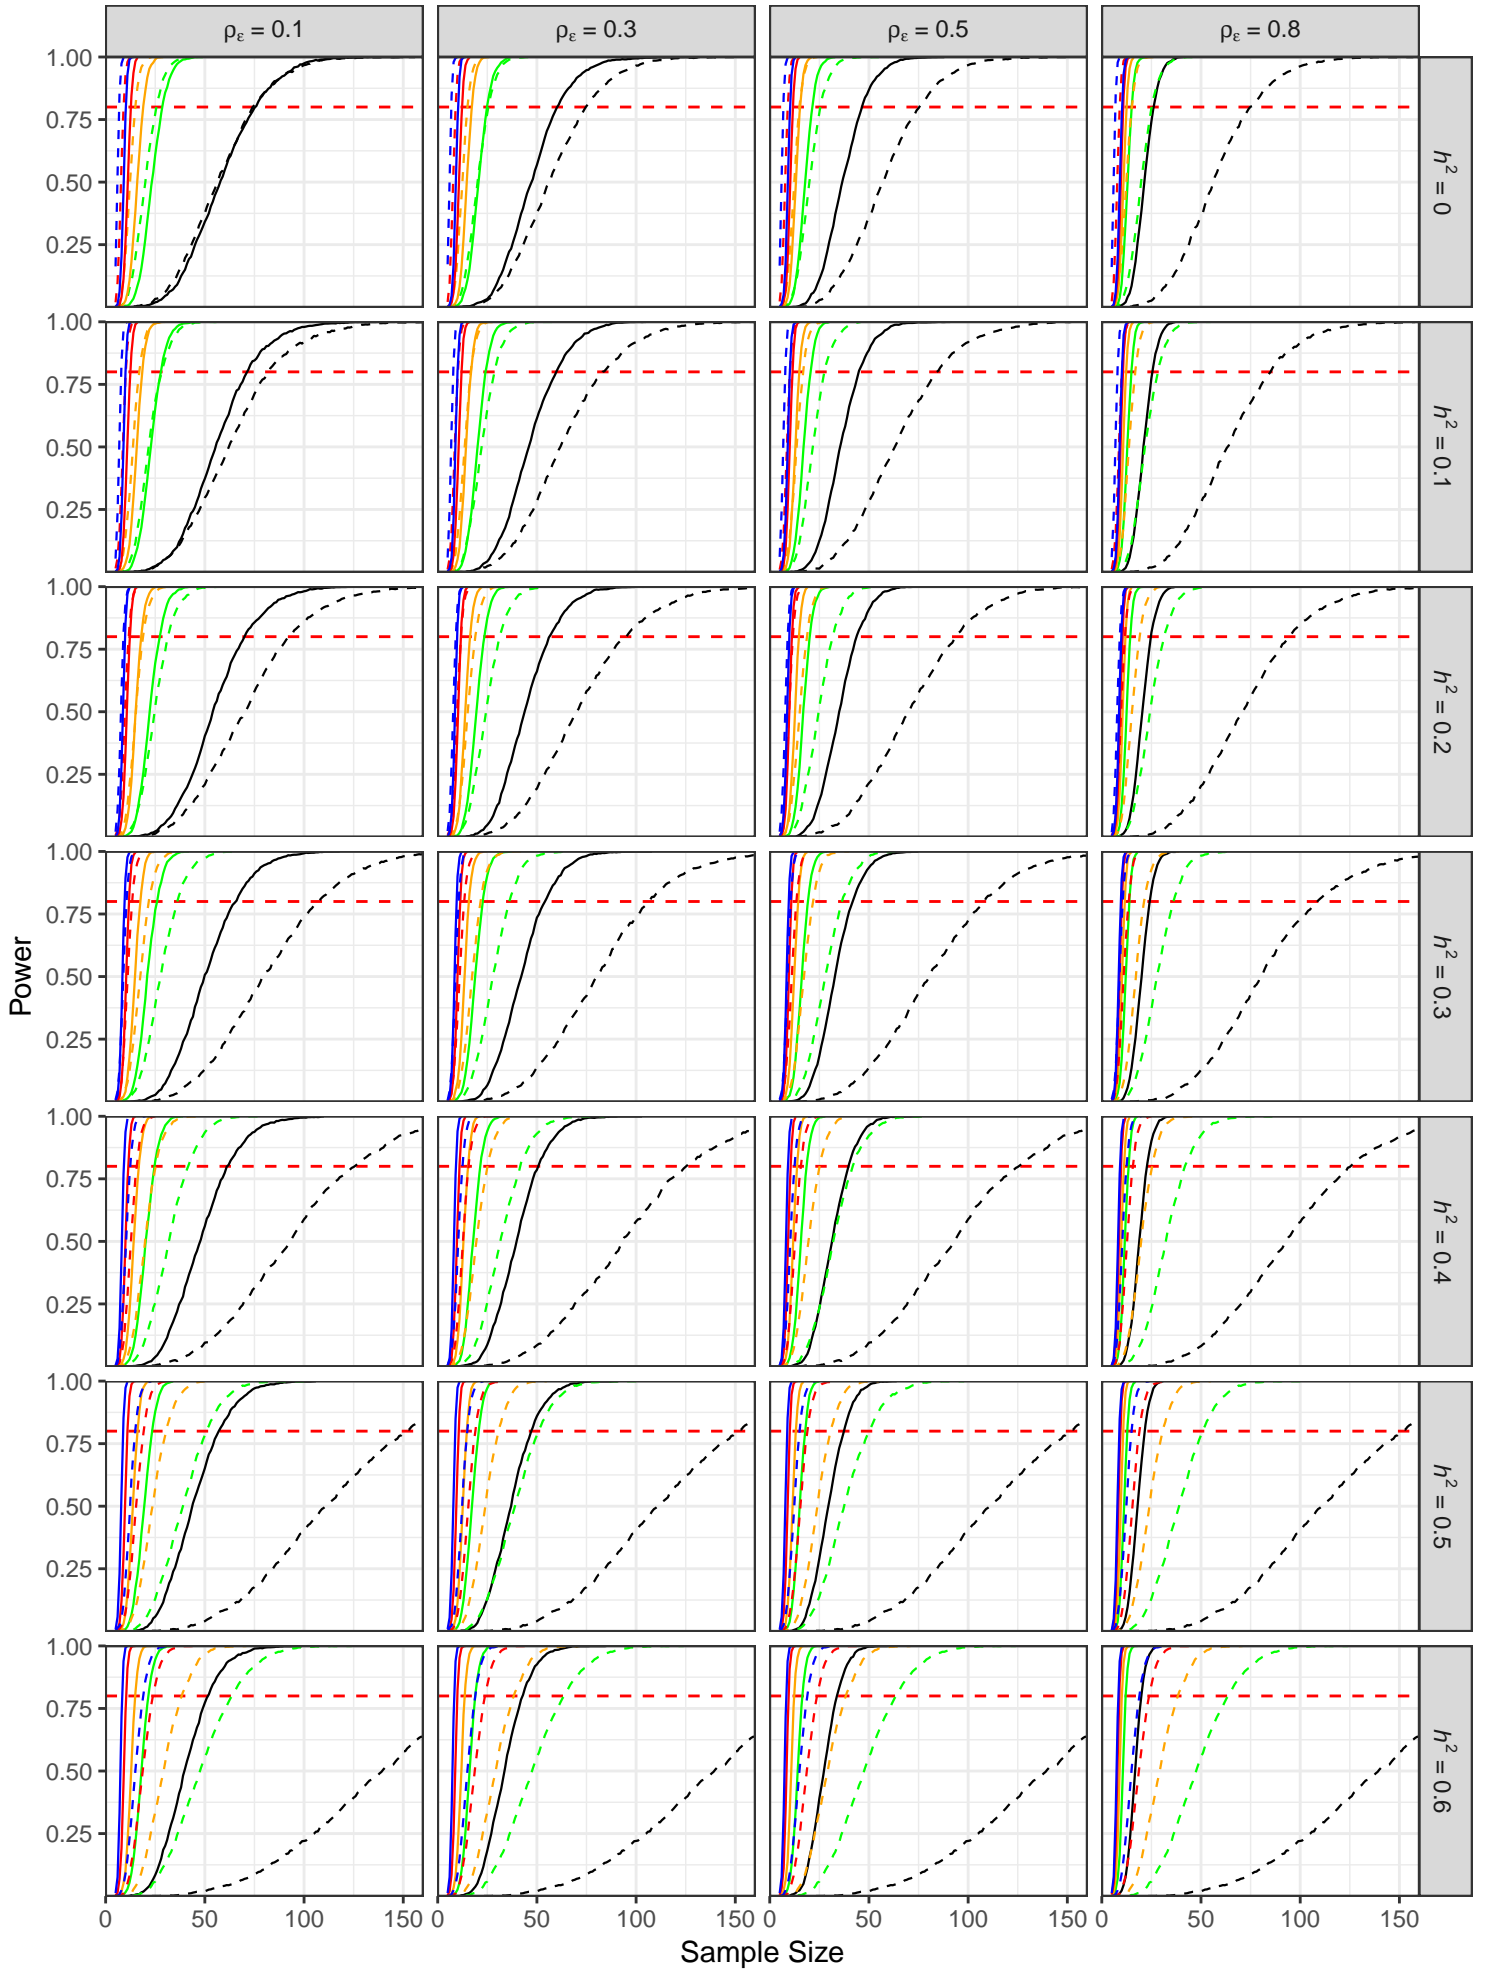

$R^2_{M,E}$  — 0.1 — 0.3 — 0.5 — 0.8 — 1

Design - - Ordinary Case-control — Discordant Twin

$P_K = 0.4$ ,  $E(M) = -3.78$ ,  $Var(M) = 1$

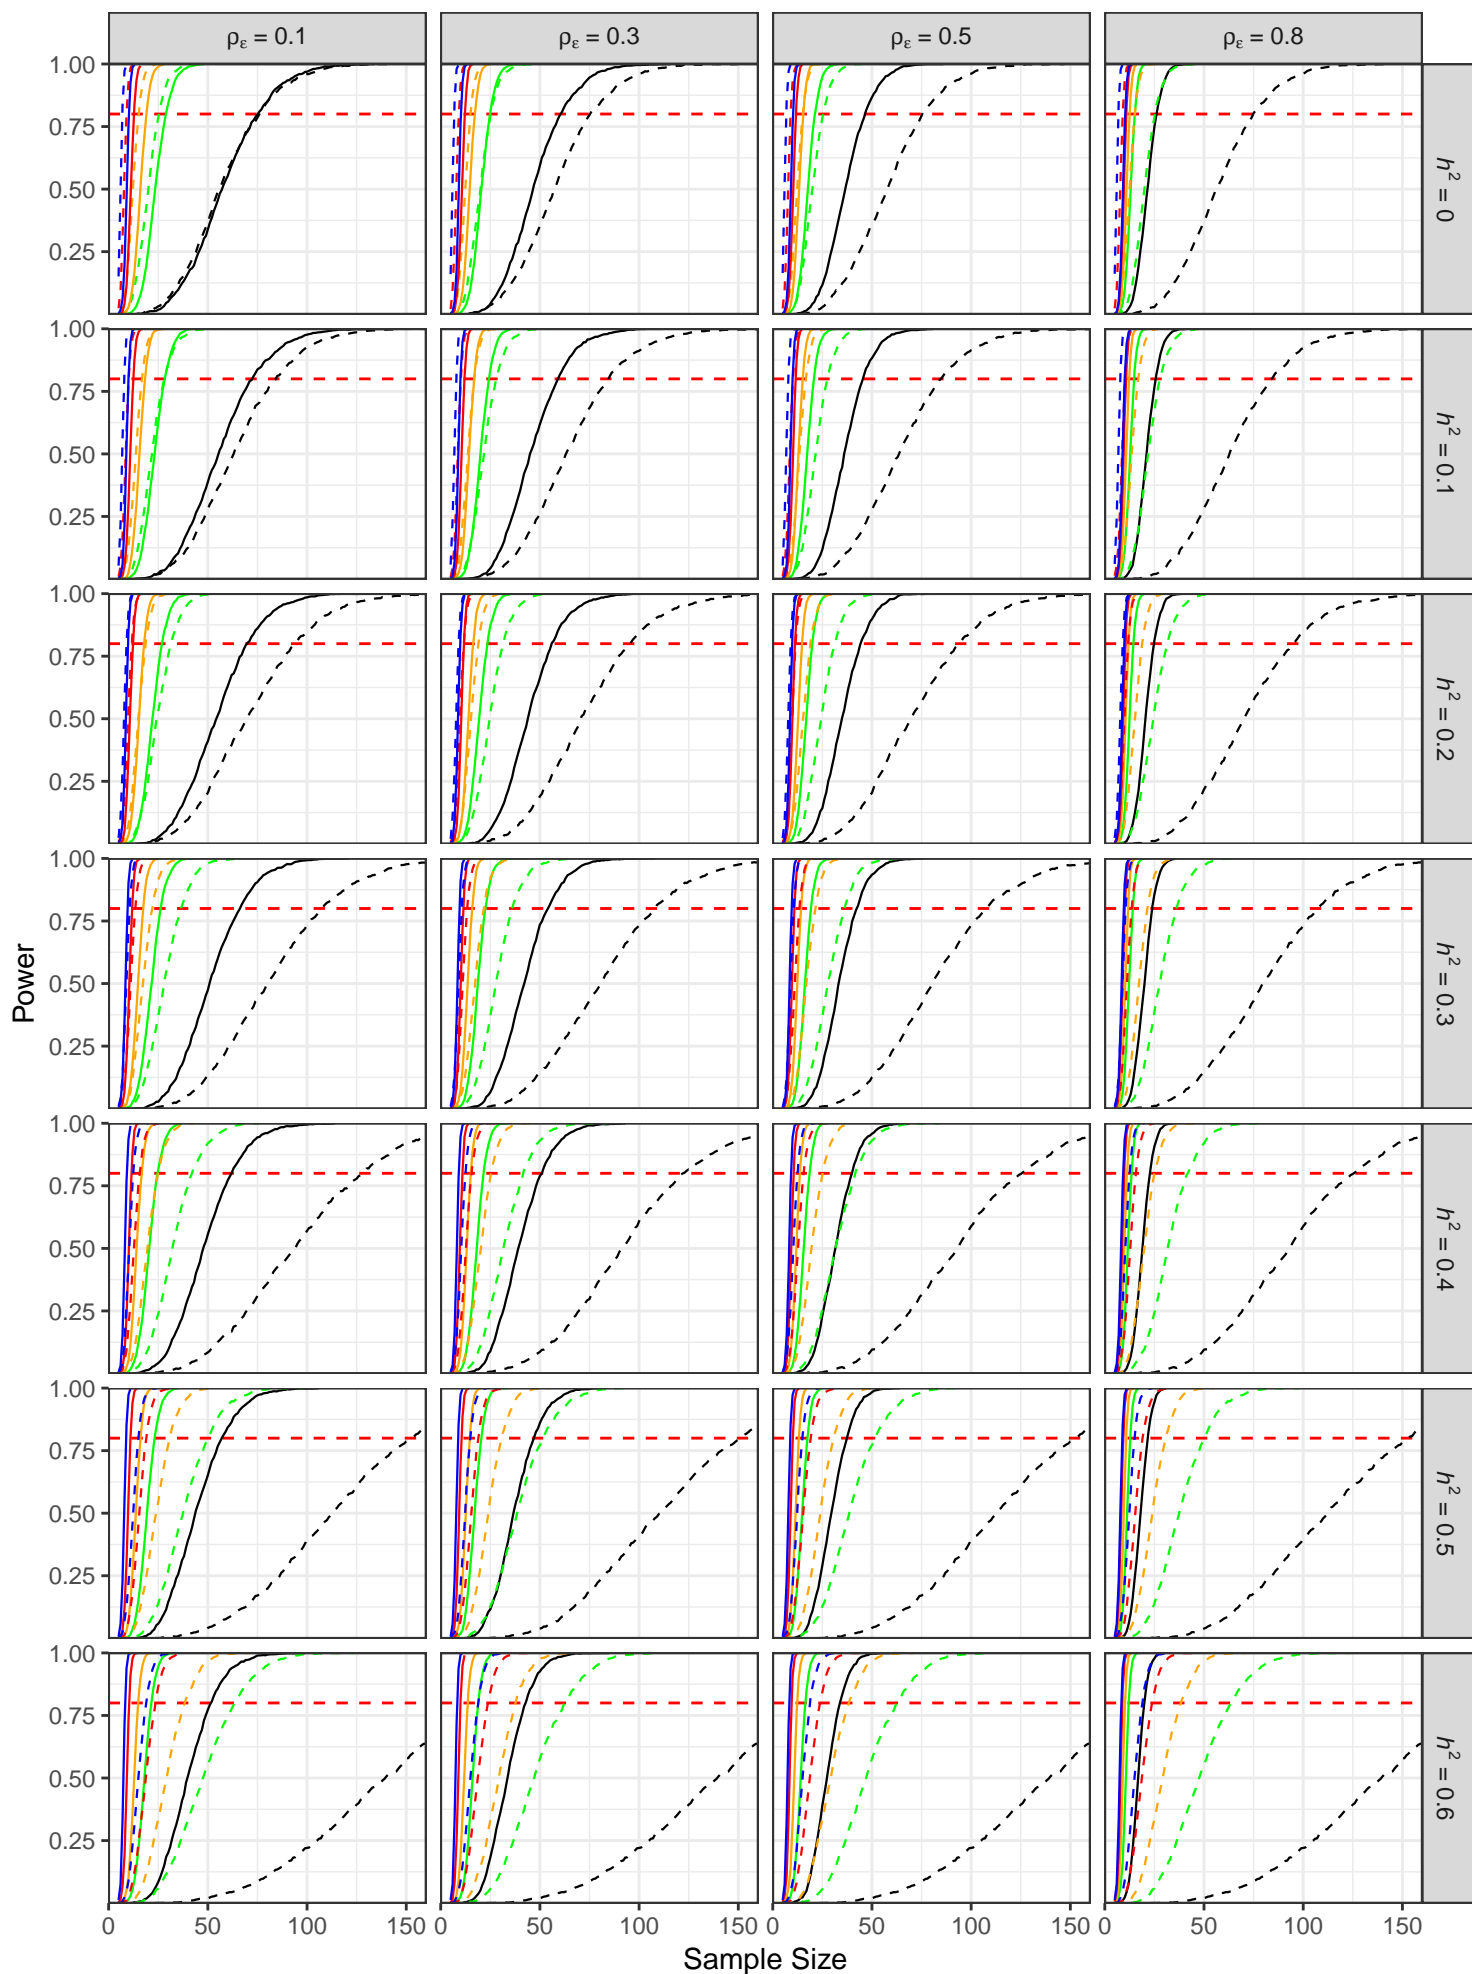

$R^2_{M,E}$  — 0.1 — 0.3 — 0.5 — 0.8 — 1

Design - - Ordinary Case-control — Discordant Twin

$P_K = 0.4$ ,  $E(M) = -3.78$ ,  $\text{Var}(M) = 2$

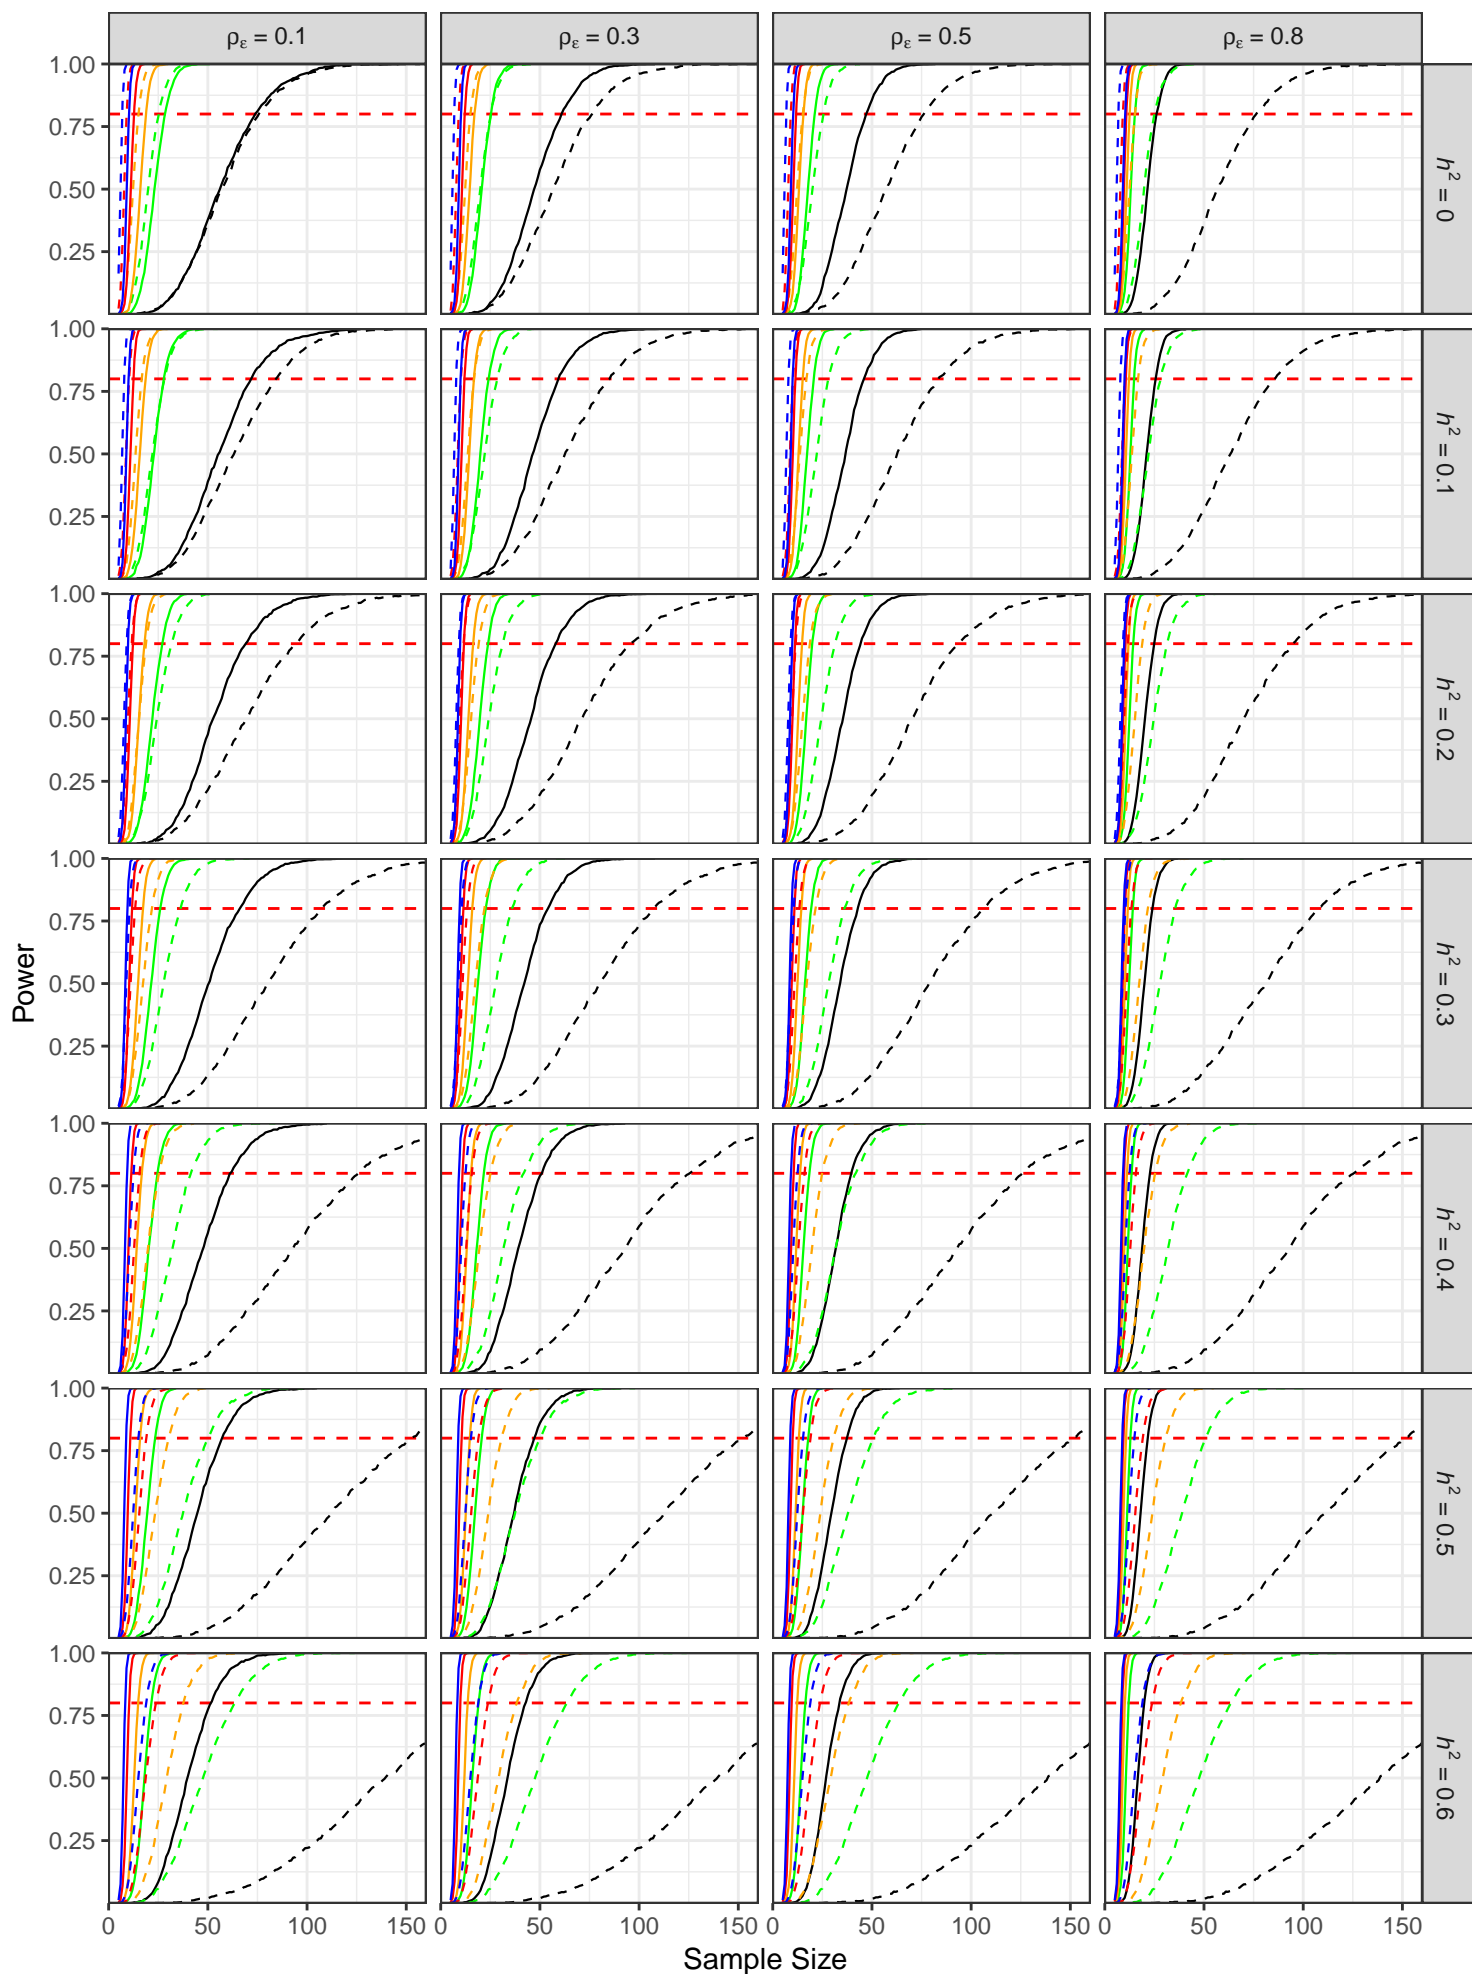

$R^2_{M,E}$  — 0.1 — 0.3 — 0.5 — 0.8 — 1

Design - - Ordinary Case-control — Discordant Twin



$P_K = 0.4$ ,  $E(M) = -3.78$ ,  $Var(M) = 3$

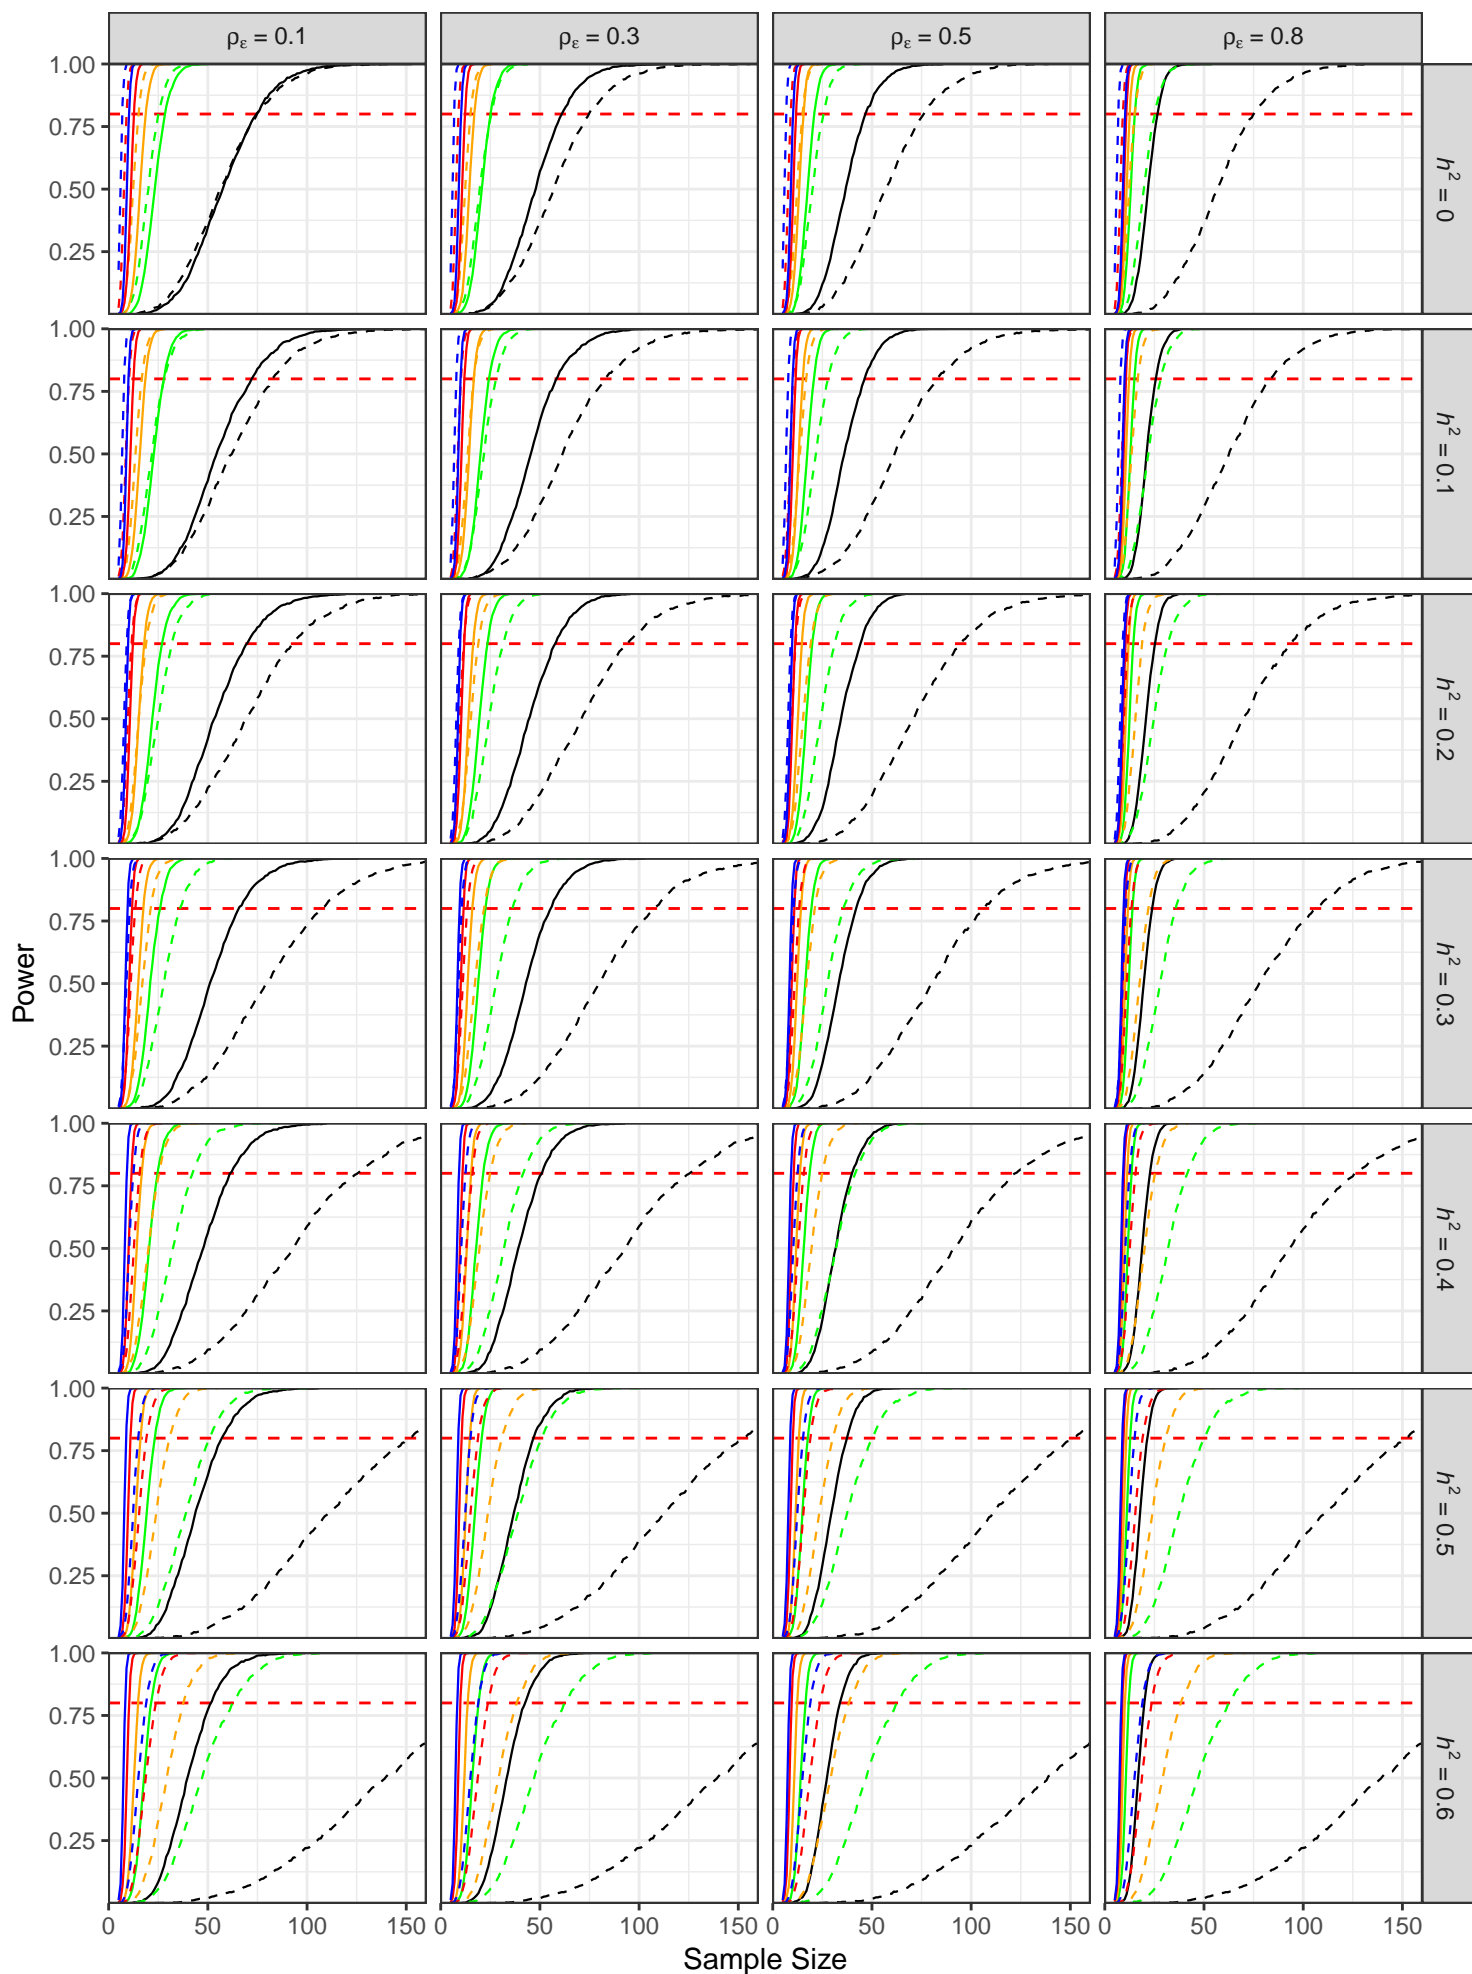

$P_K = 0.4$ ,  $E(M) = -3.78$ ,  $\text{Var}(M) = 4$

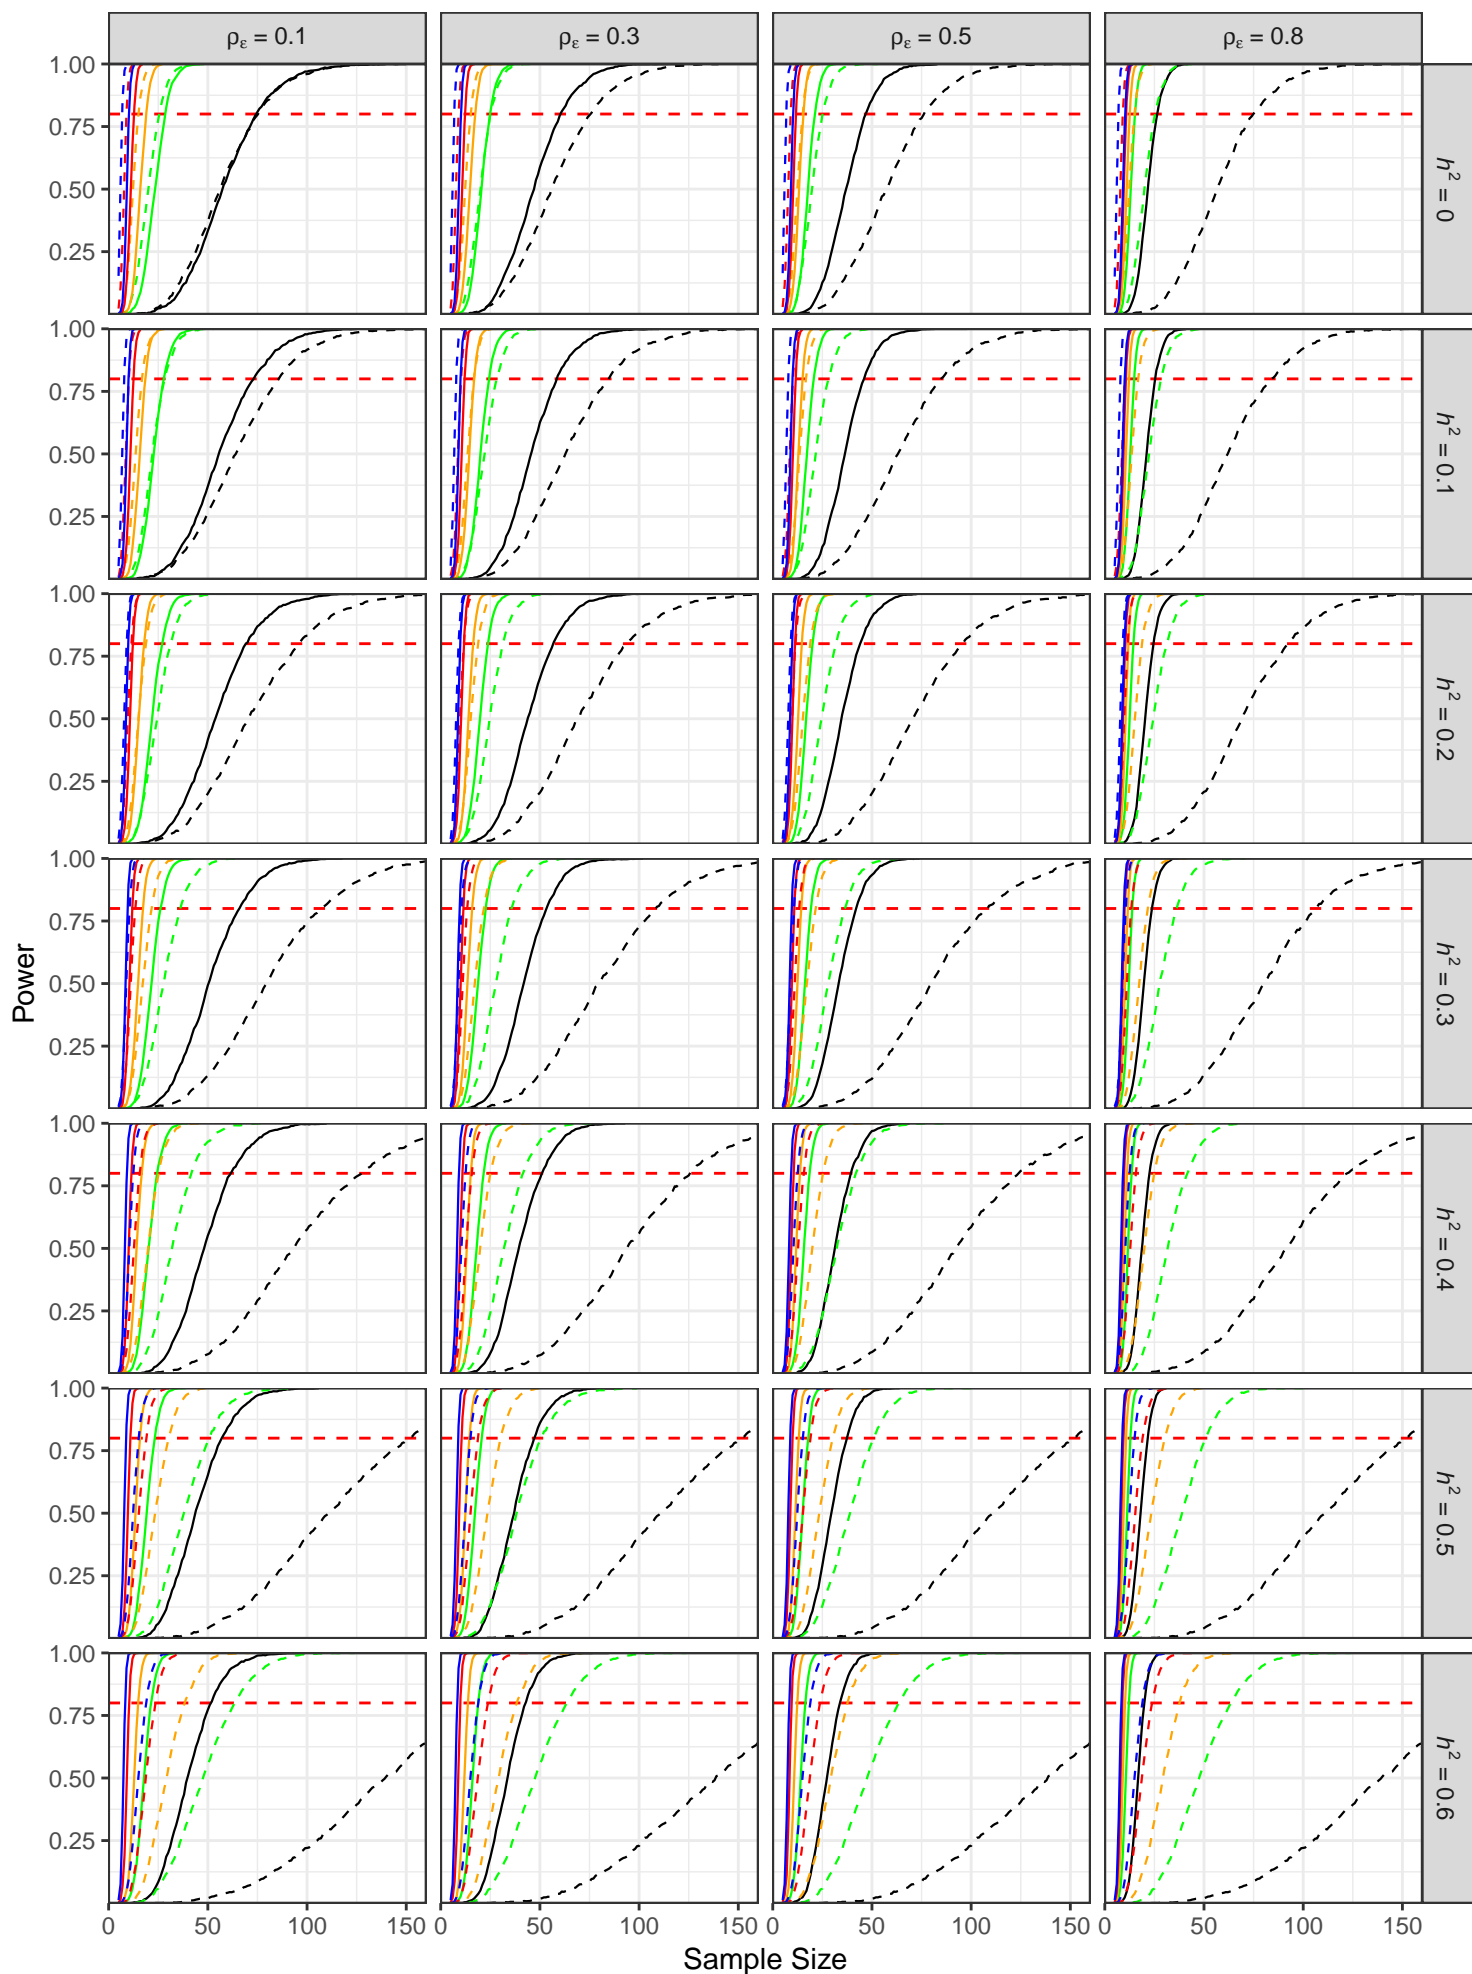

$R^2_{M,E}$  — 0.1 — 0.3 — 0.5 — 0.8 — 1

Design - - Ordinary Case-control — Discordant Twin

$P_K = 0.4$ ,  $E(M) = 3.36$ ,  $\text{Var}(M) = 0.06$

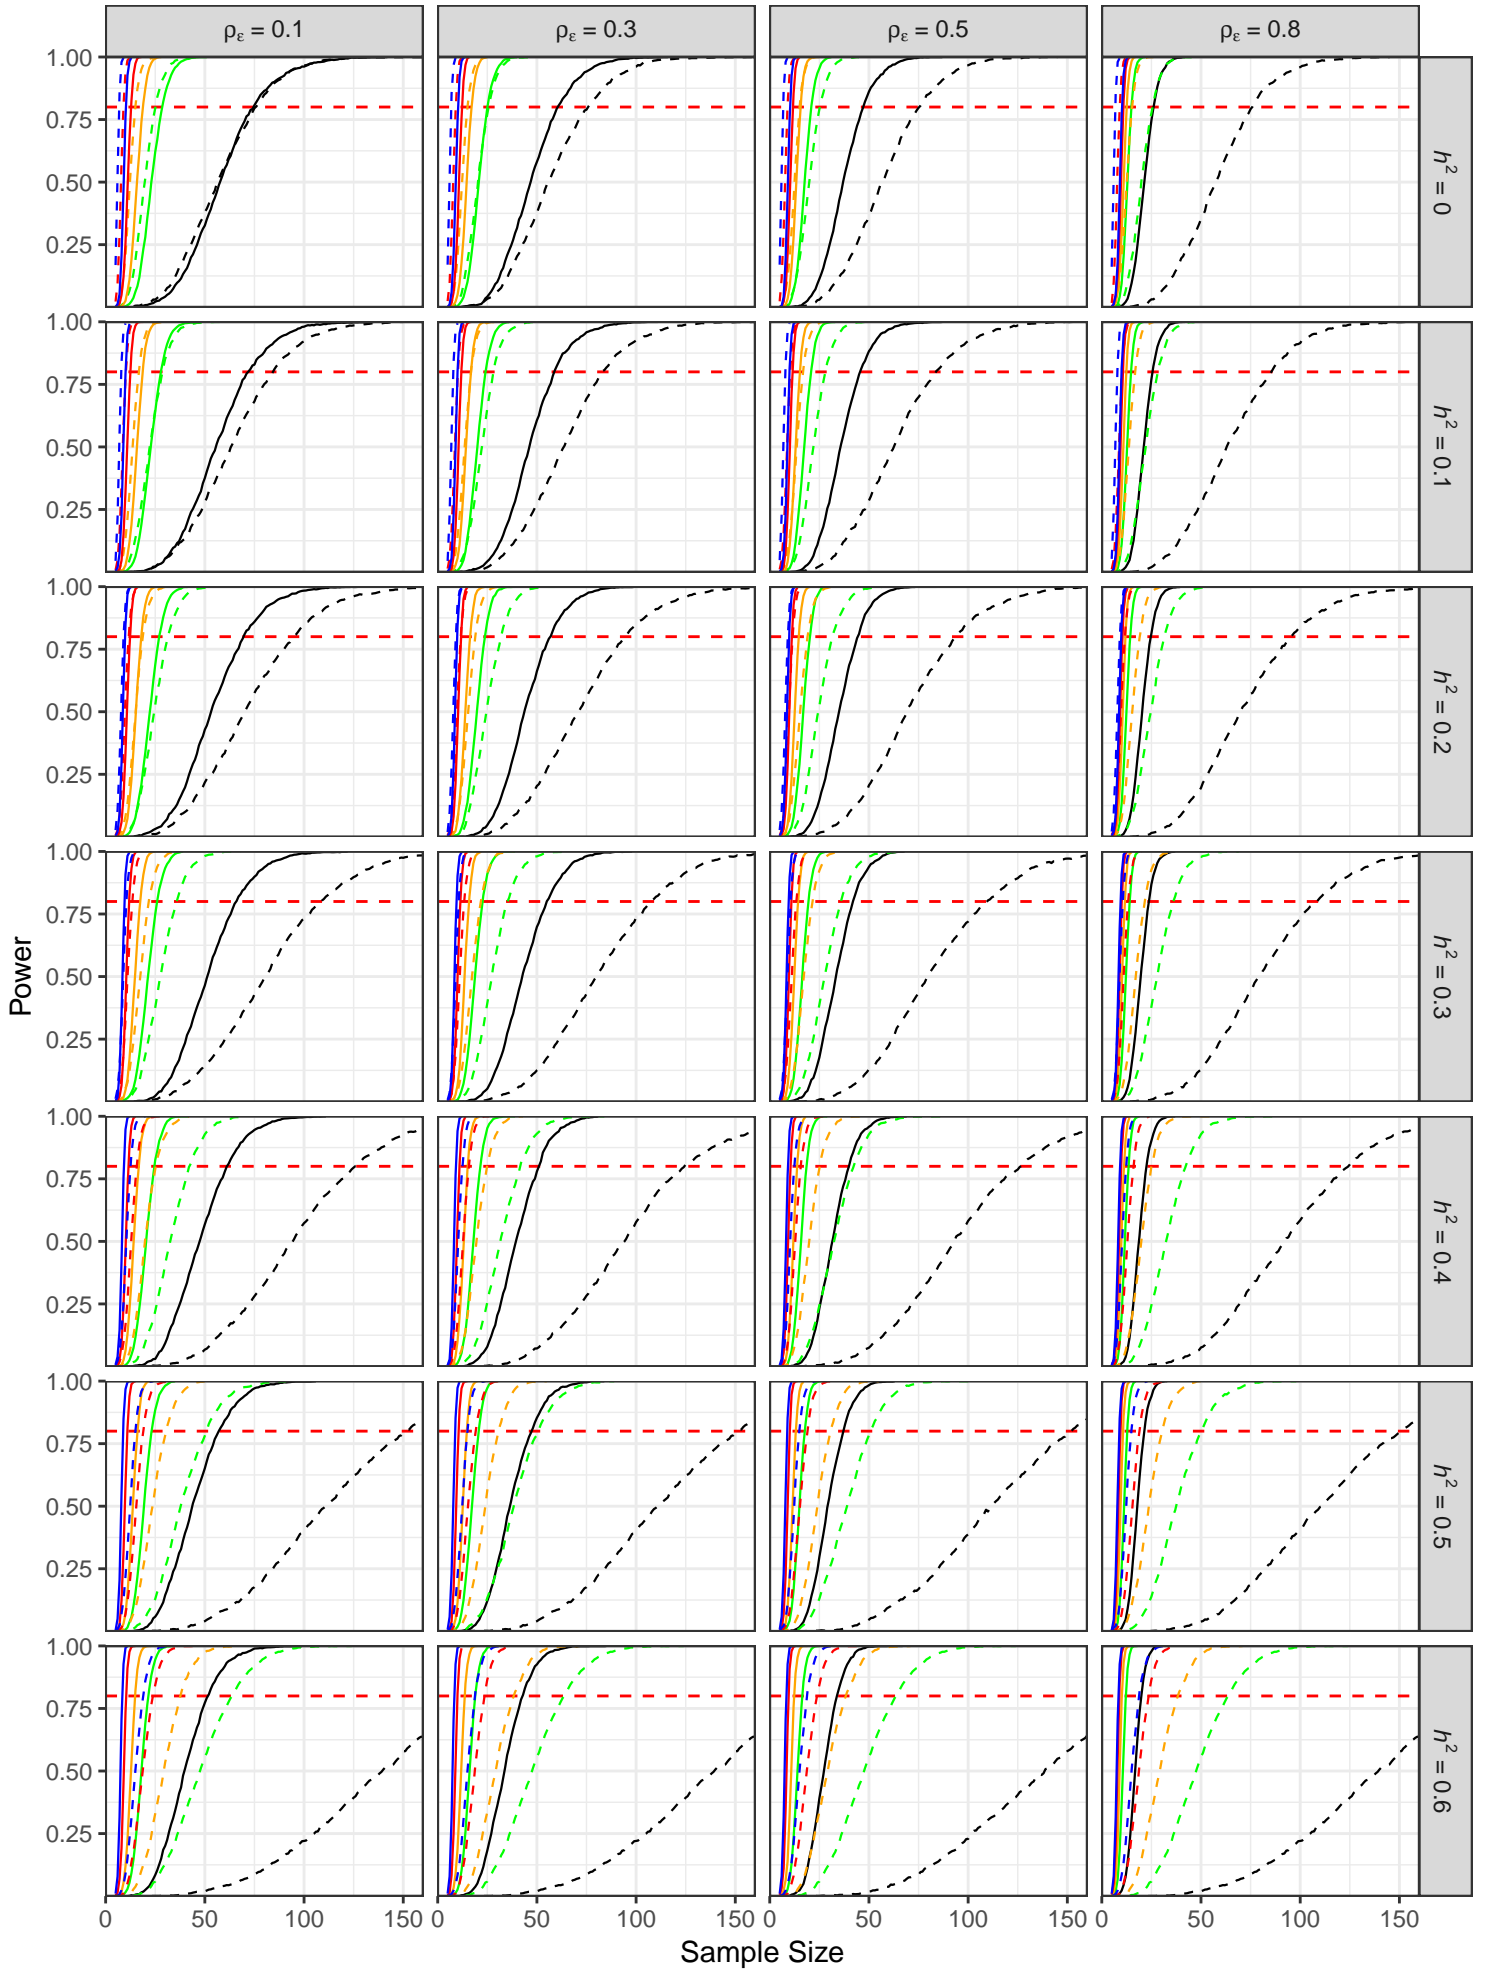

$R^2_{M,E}$  — 0.1 — 0.3 — 0.5 — 0.8 — 1

Design - - Ordinary Case-control — Discordant Twin

$P_K = 0.4$ ,  $E(M) = 3.36$ ,  $Var(M) = 1$

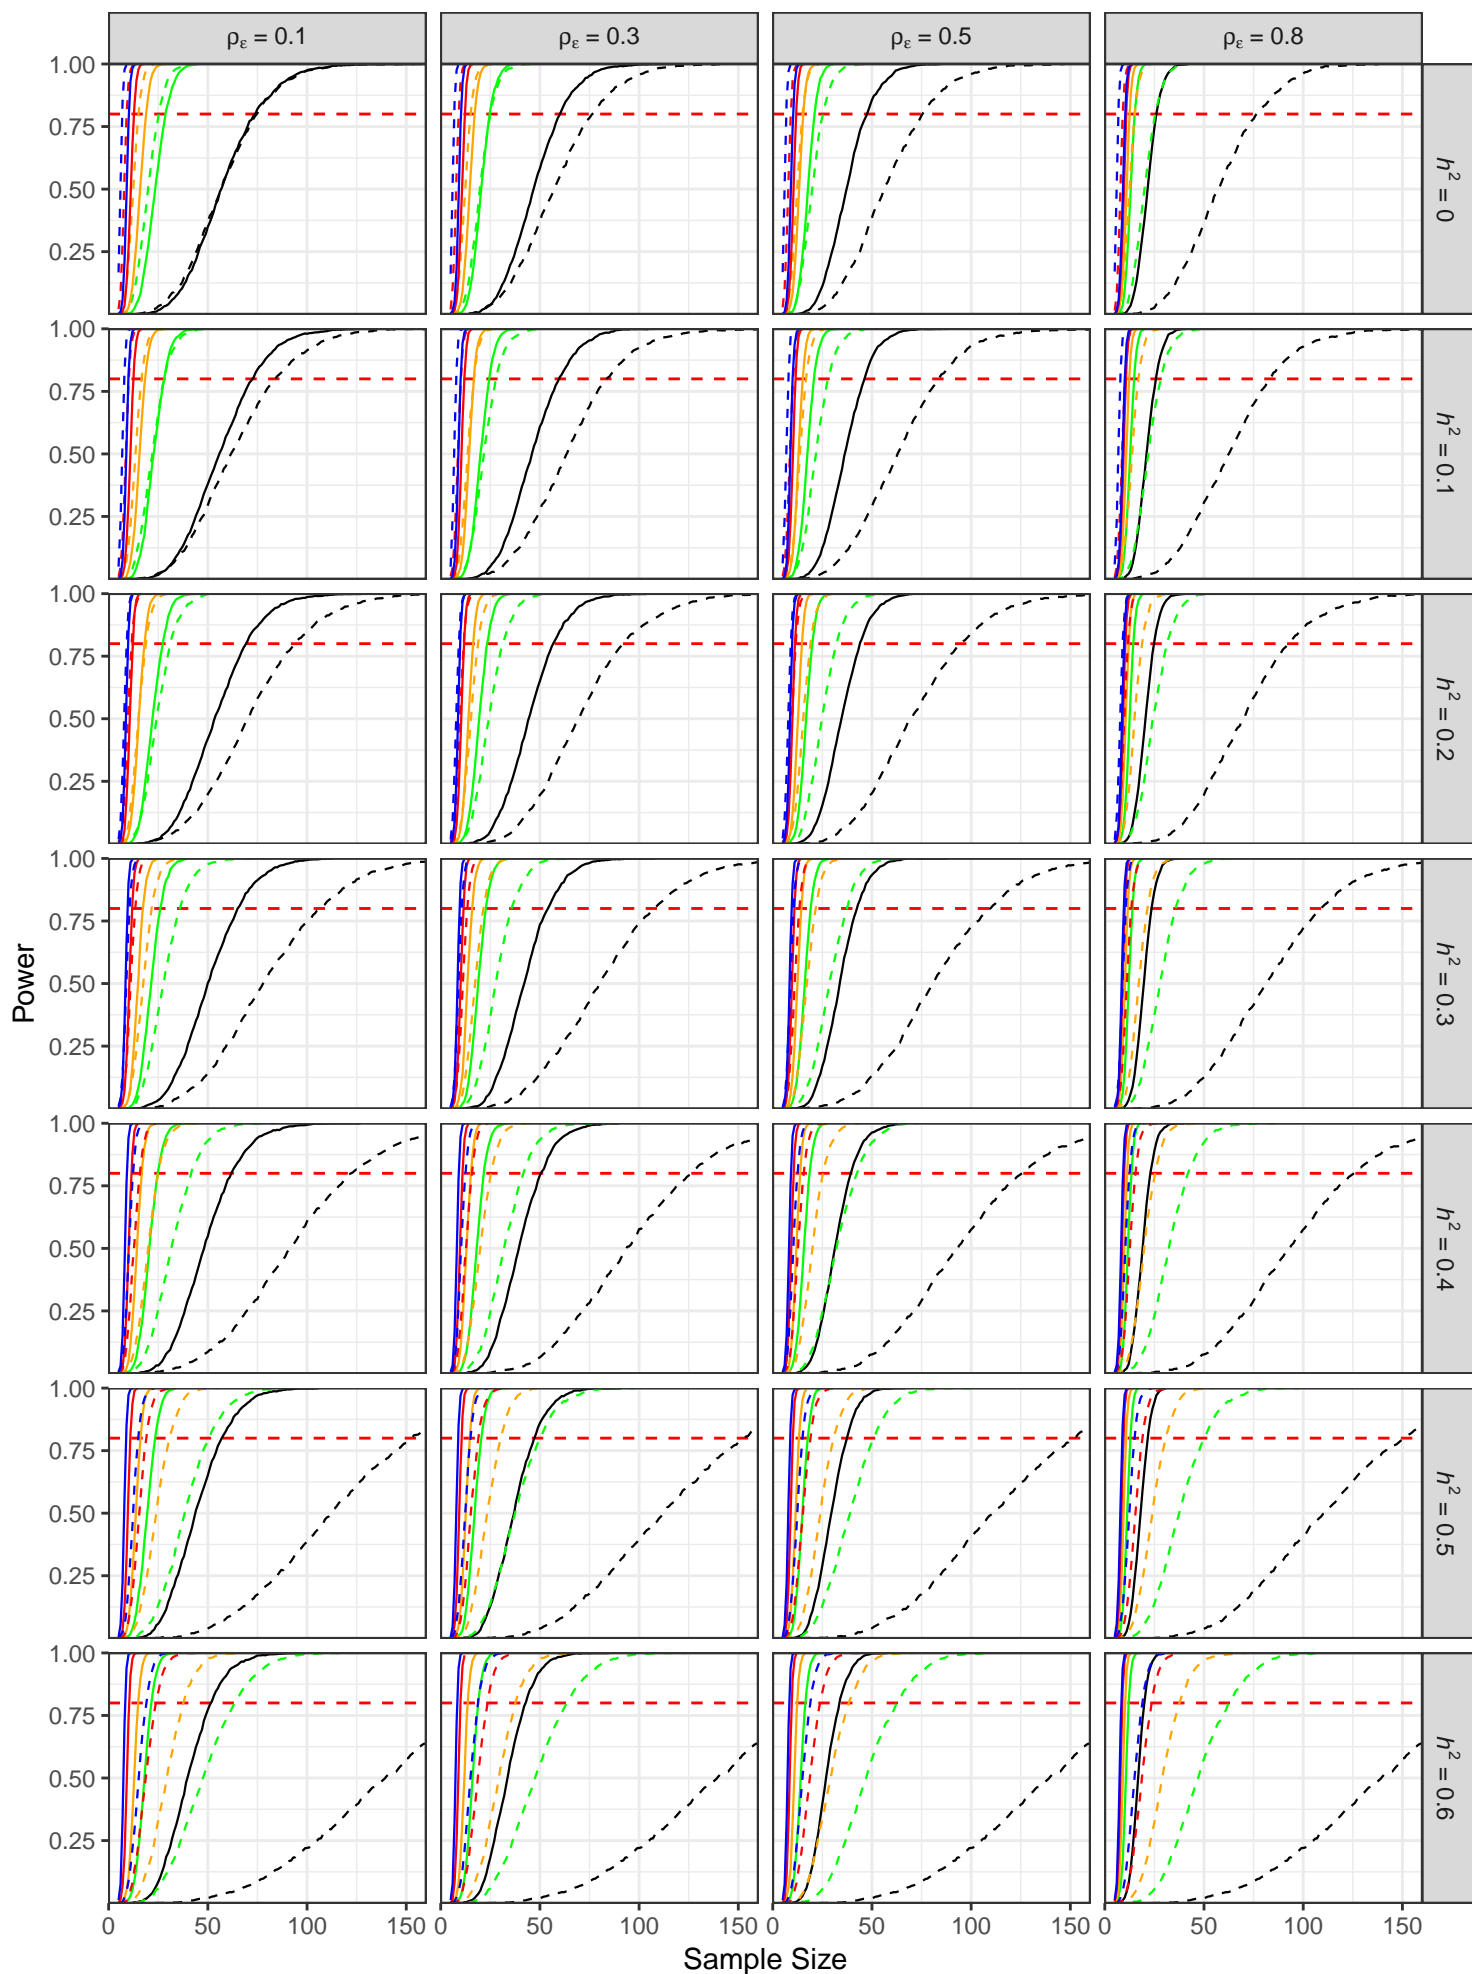

$R^2_{M,E}$  — 0.1 — 0.3 — 0.5 — 0.8 — 1

Design - - Ordinary Case-control — Discordant Twin

$P_K = 0.4$ ,  $E(M) = 3.36$ ,  $Var(M) = 2$

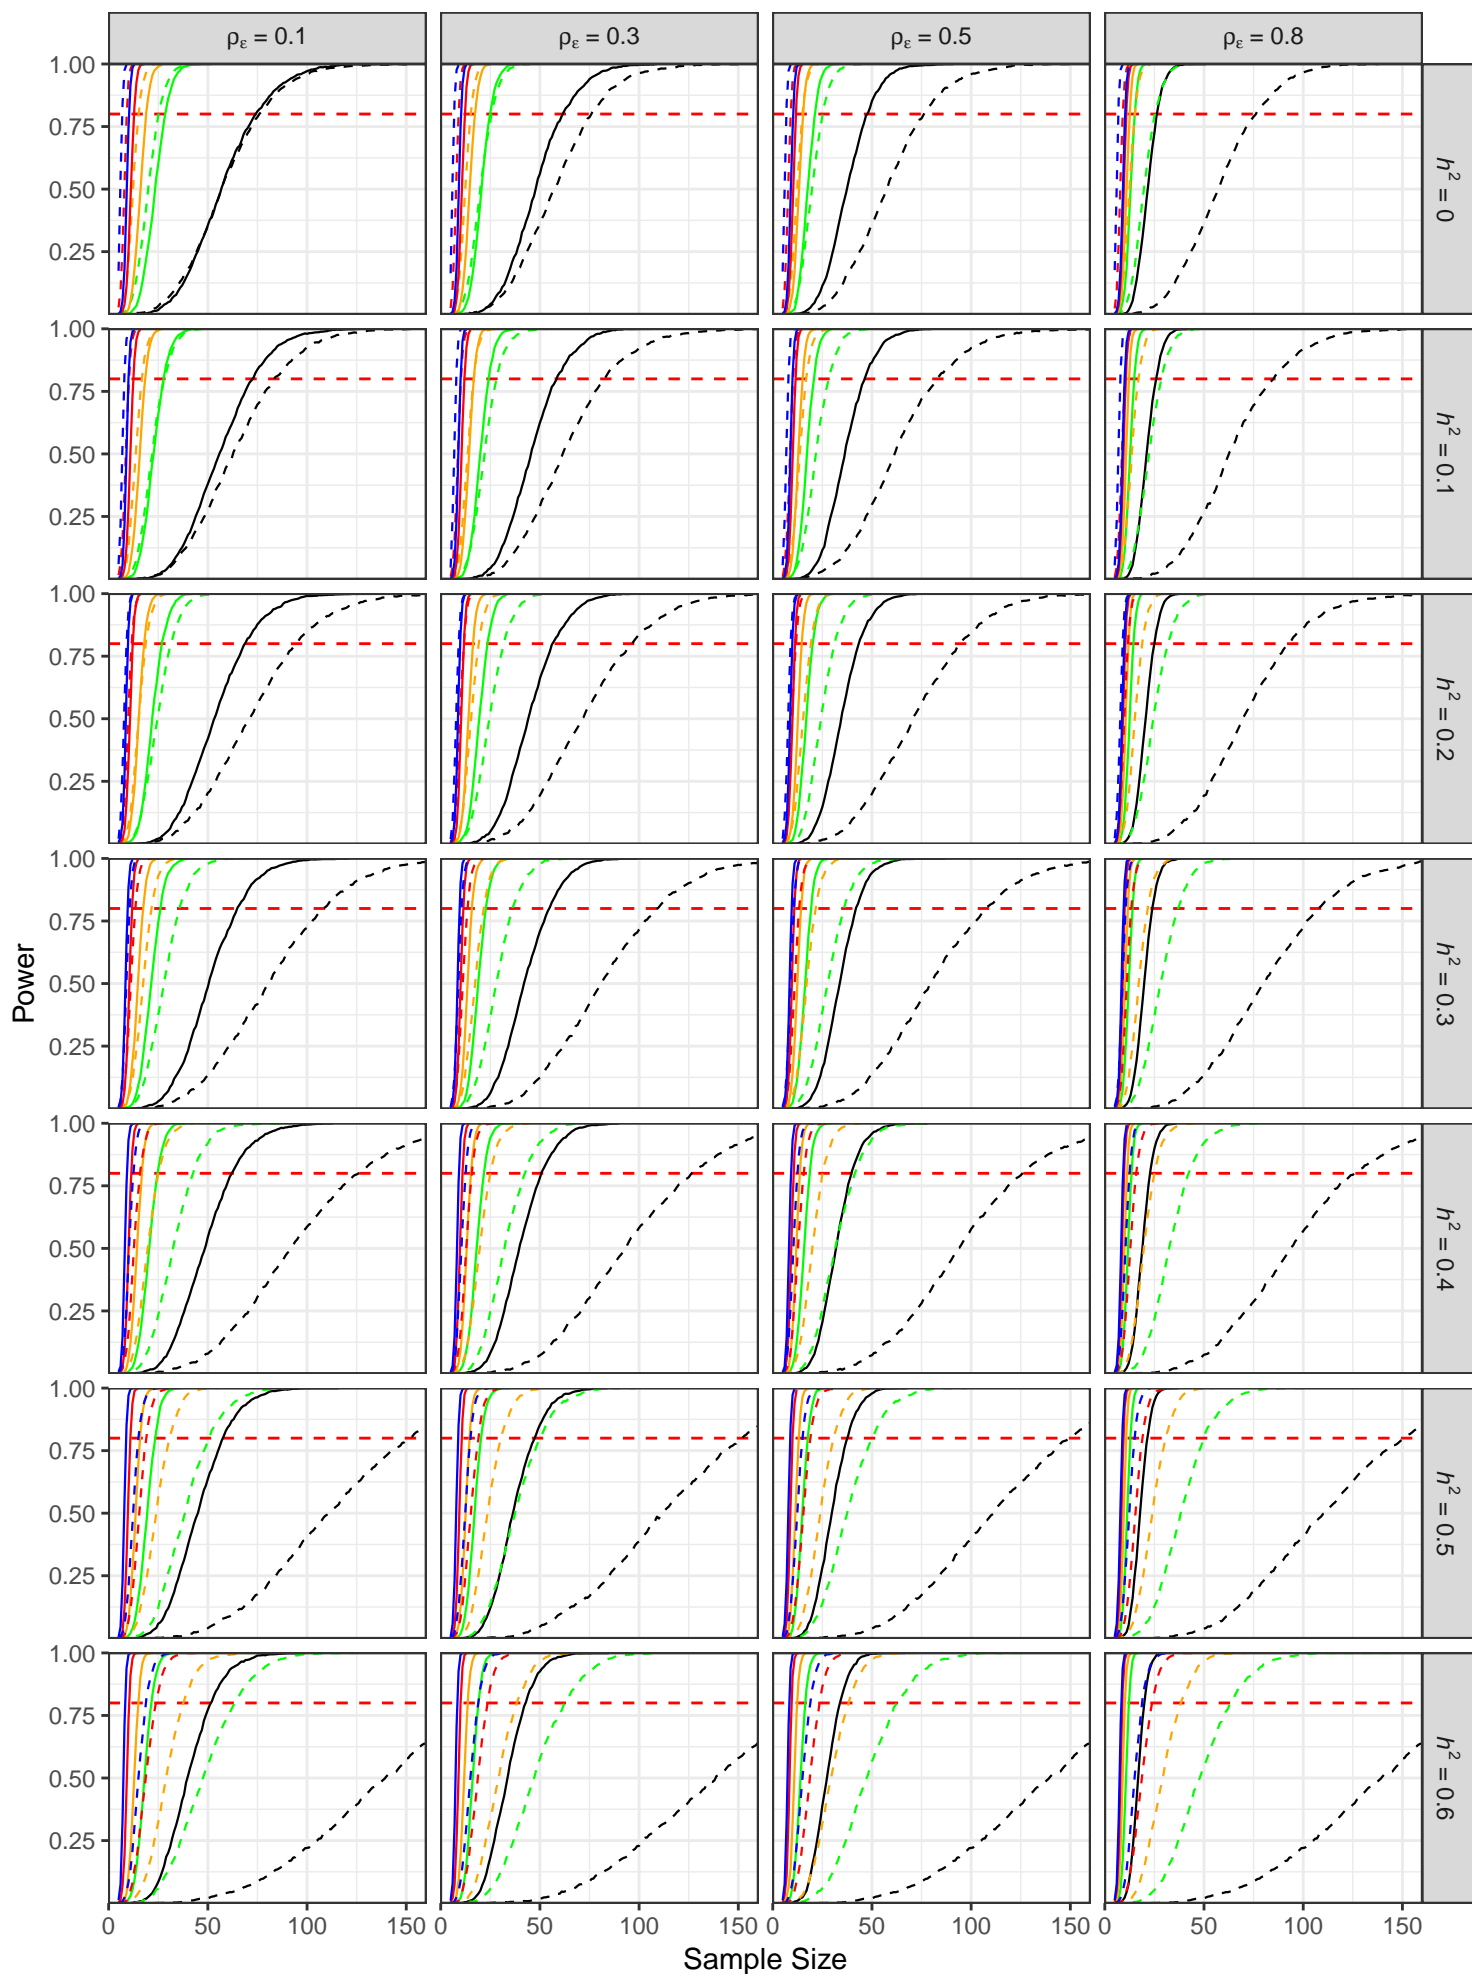



$P_K = 0.4$ ,  $E(M) = 3.36$ ,  $Var(M) = 3$

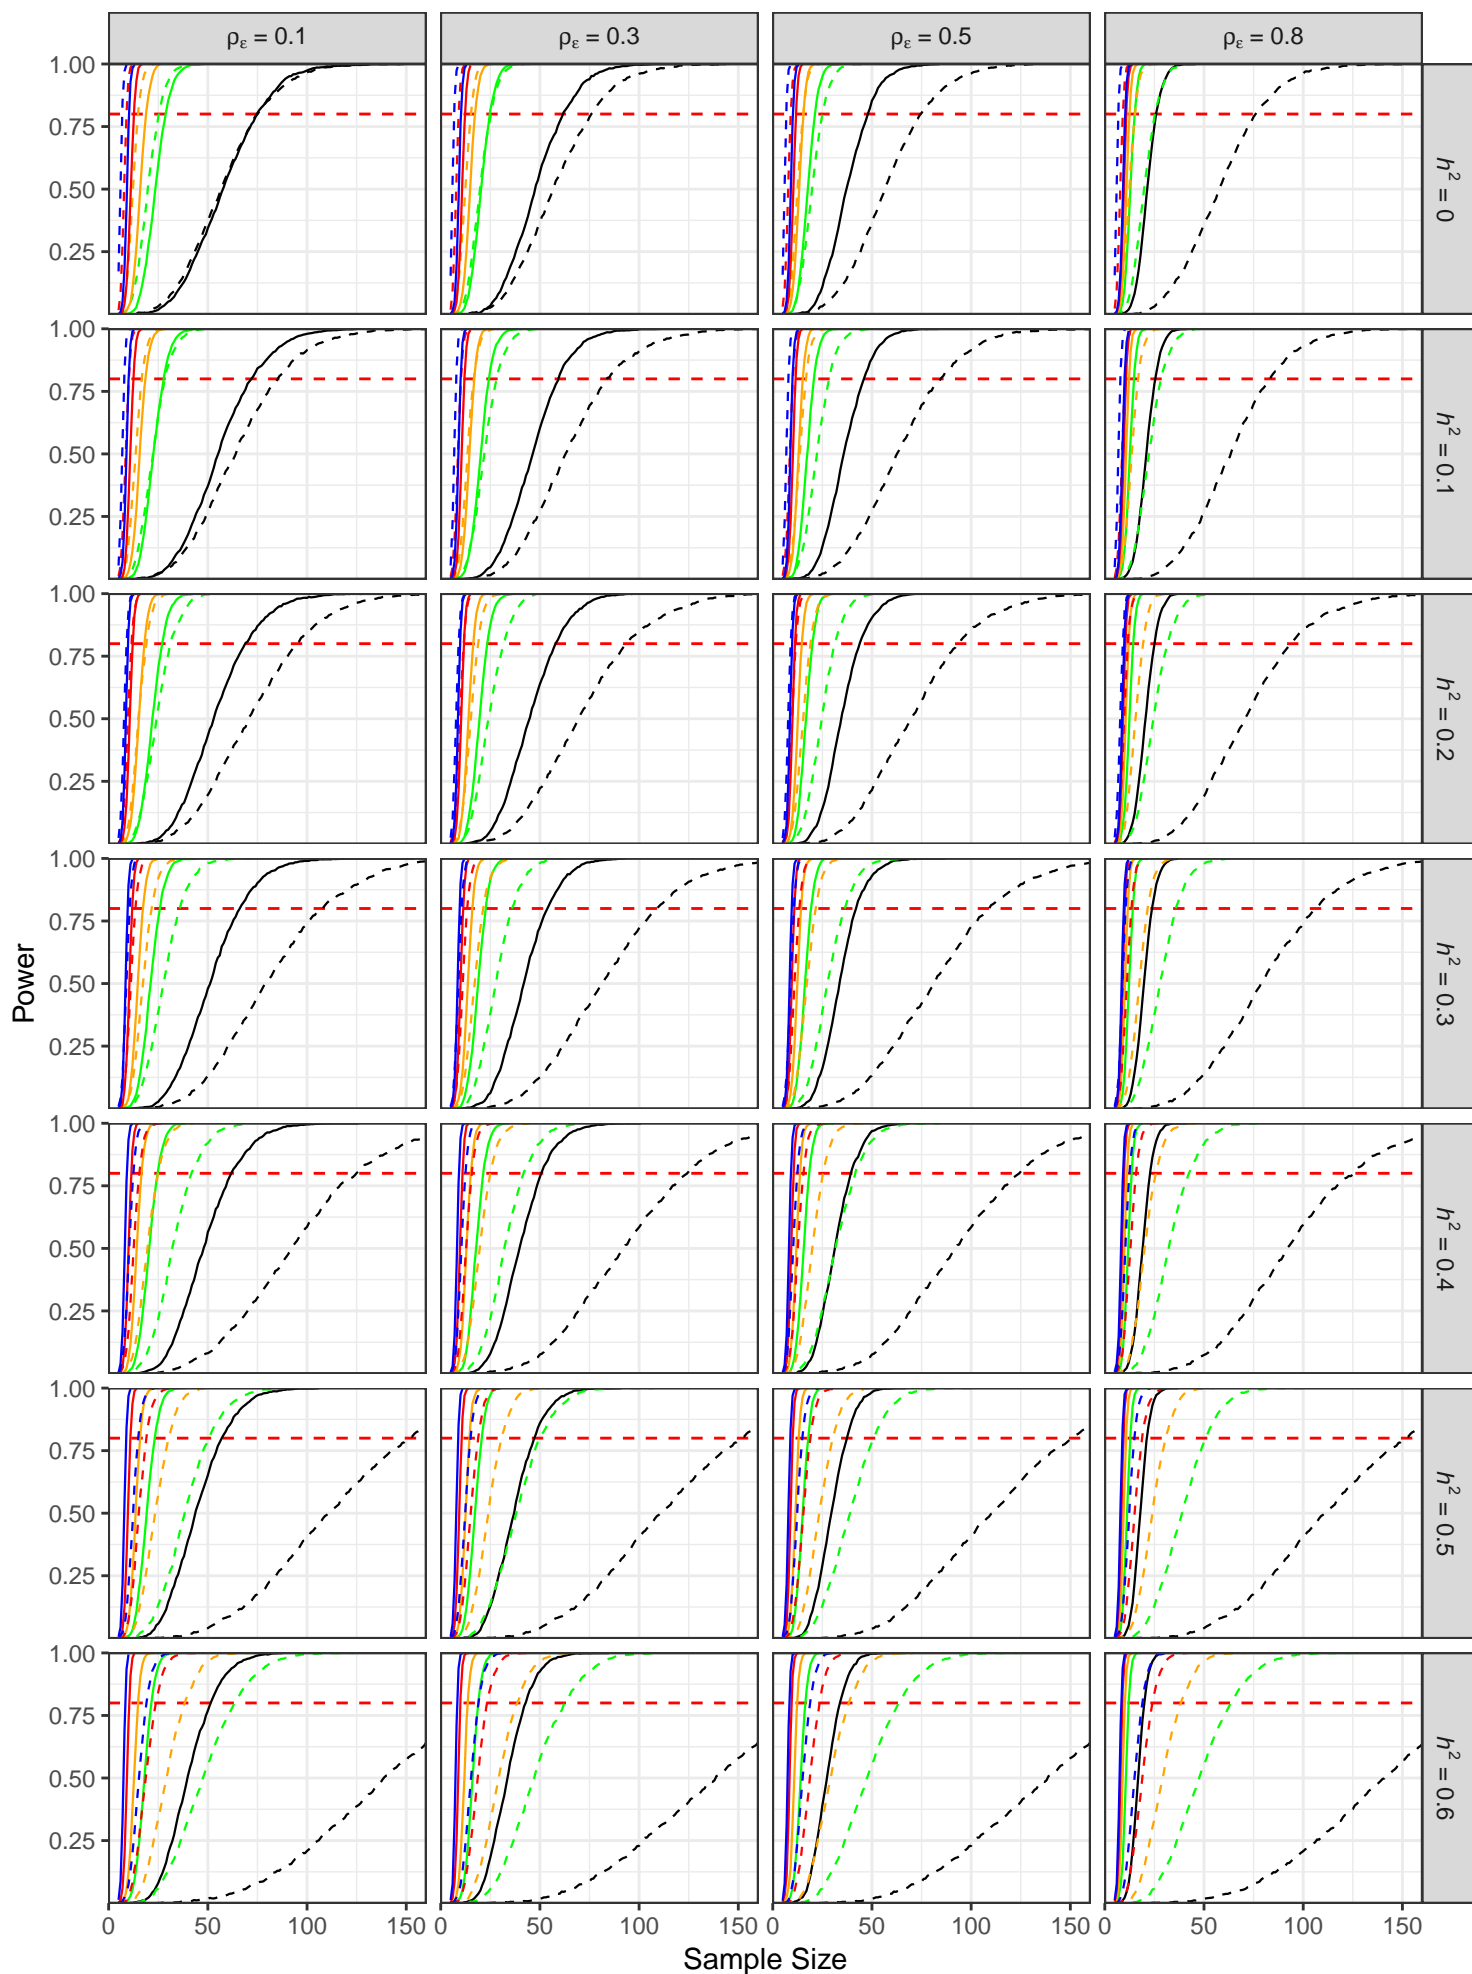

$P_K = 0.4$ ,  $E(M) = 3.36$ ,  $Var(M) = 4$

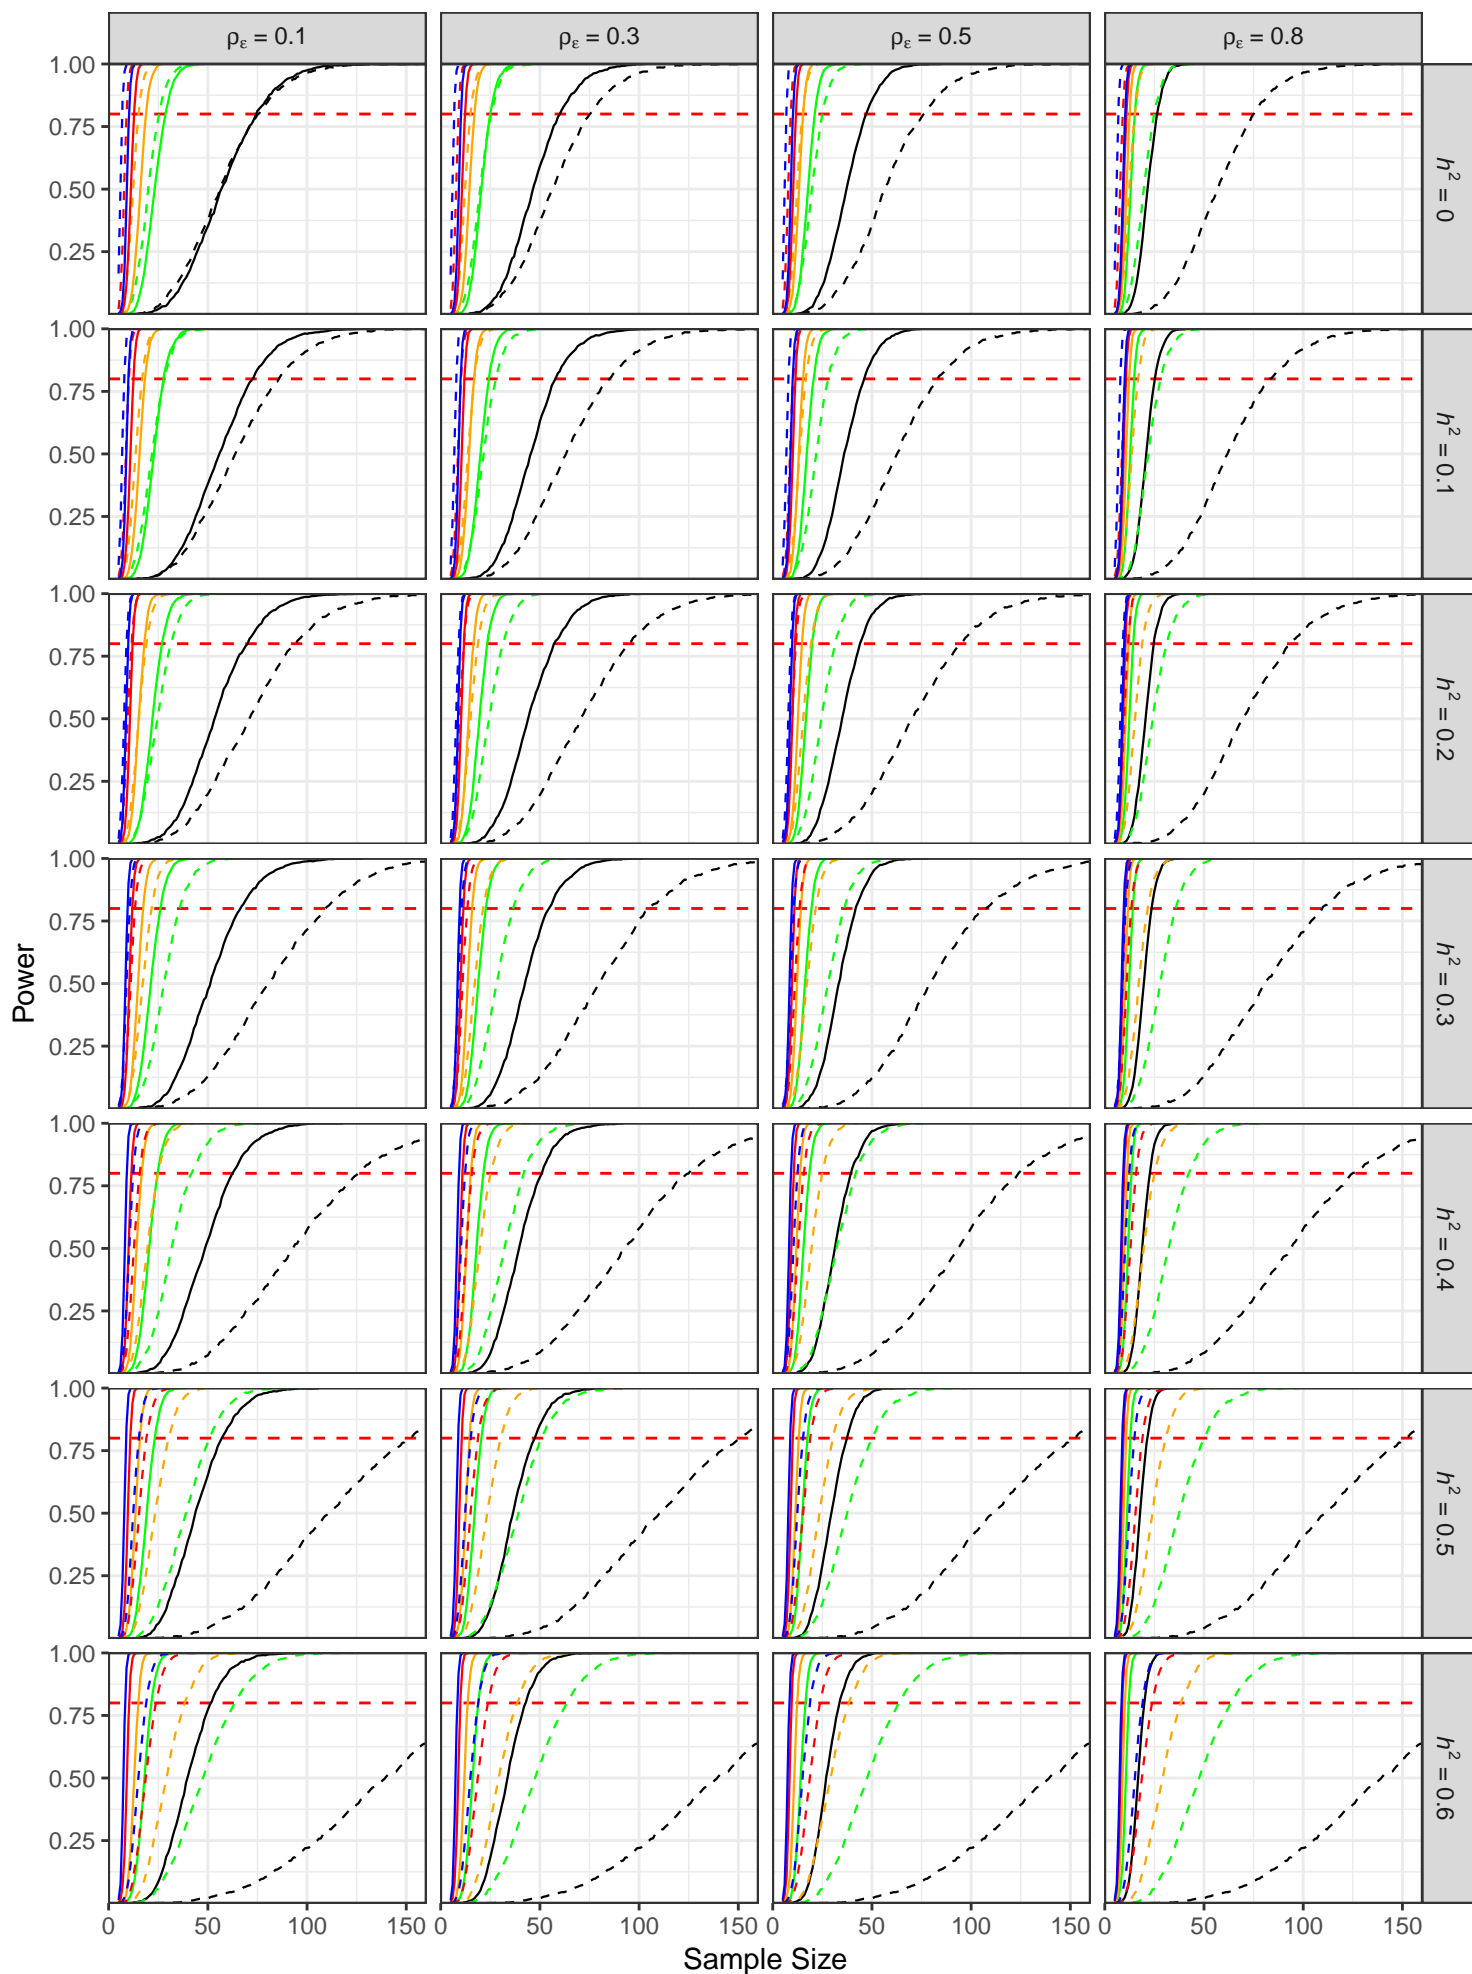

$R^2_{M,E}$  — 0.1 — 0.3 — 0.5 — 0.8 — 1

Design - - Ordinary Case-control — Discordant Twin
