# Supplementary figures and images for: On the power of epigenome-wide association studies using a disease-discordant twin design
Source: Oxford University Press journal article supplement (doi:10.1093/bioinformatics/bty532), 2018-06-27

**A**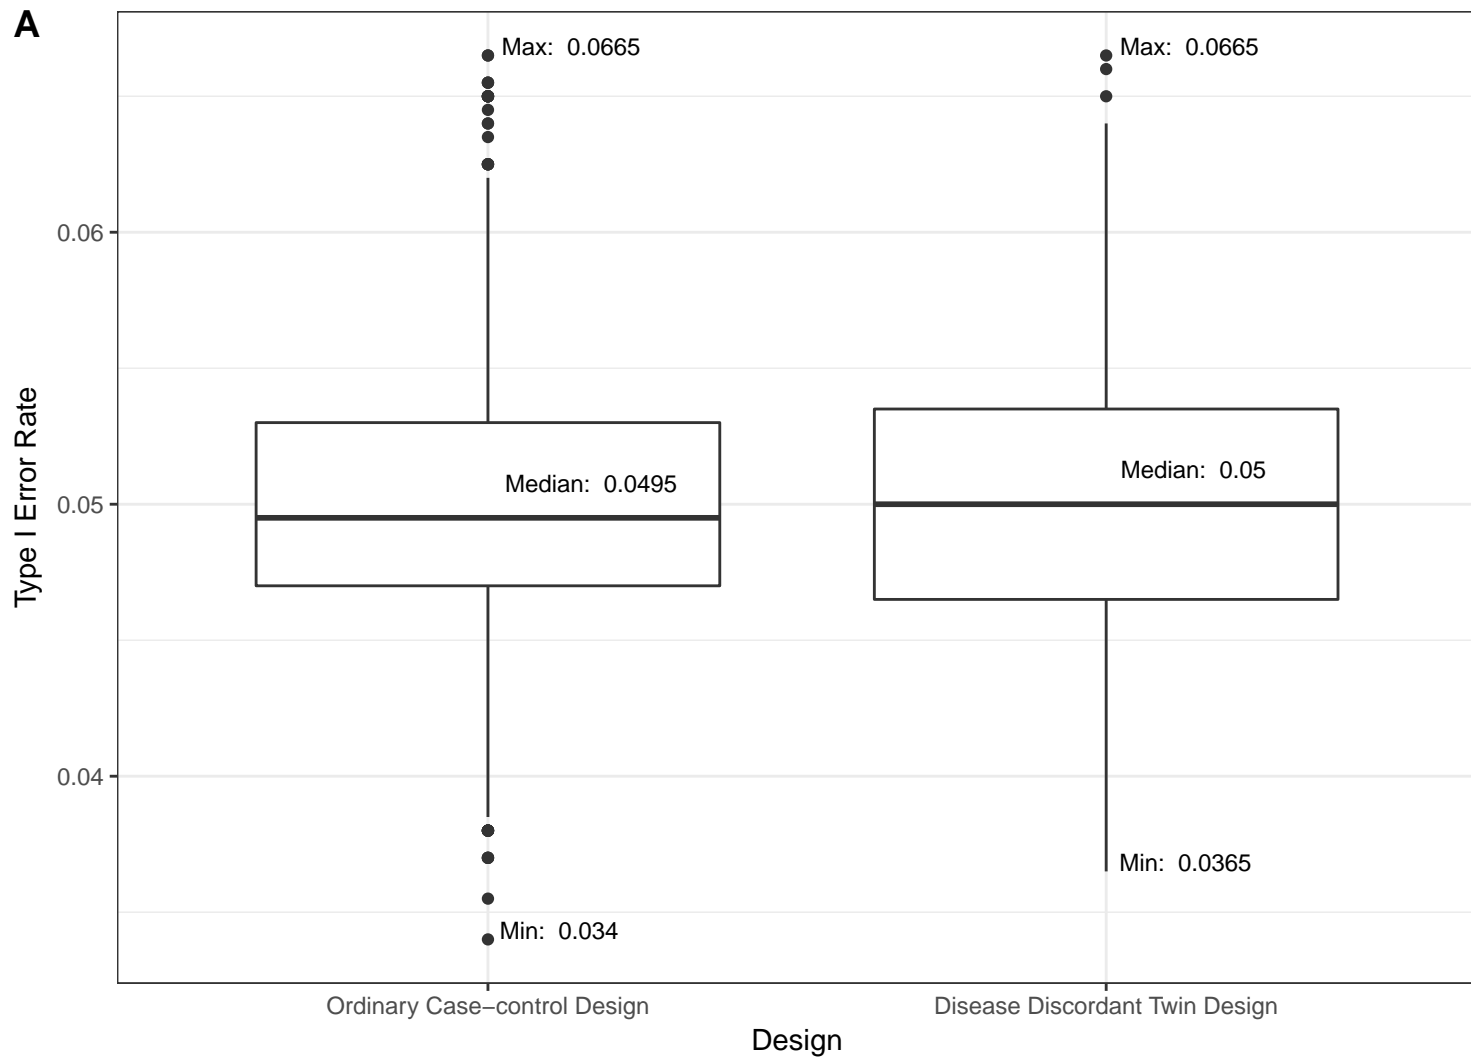**B**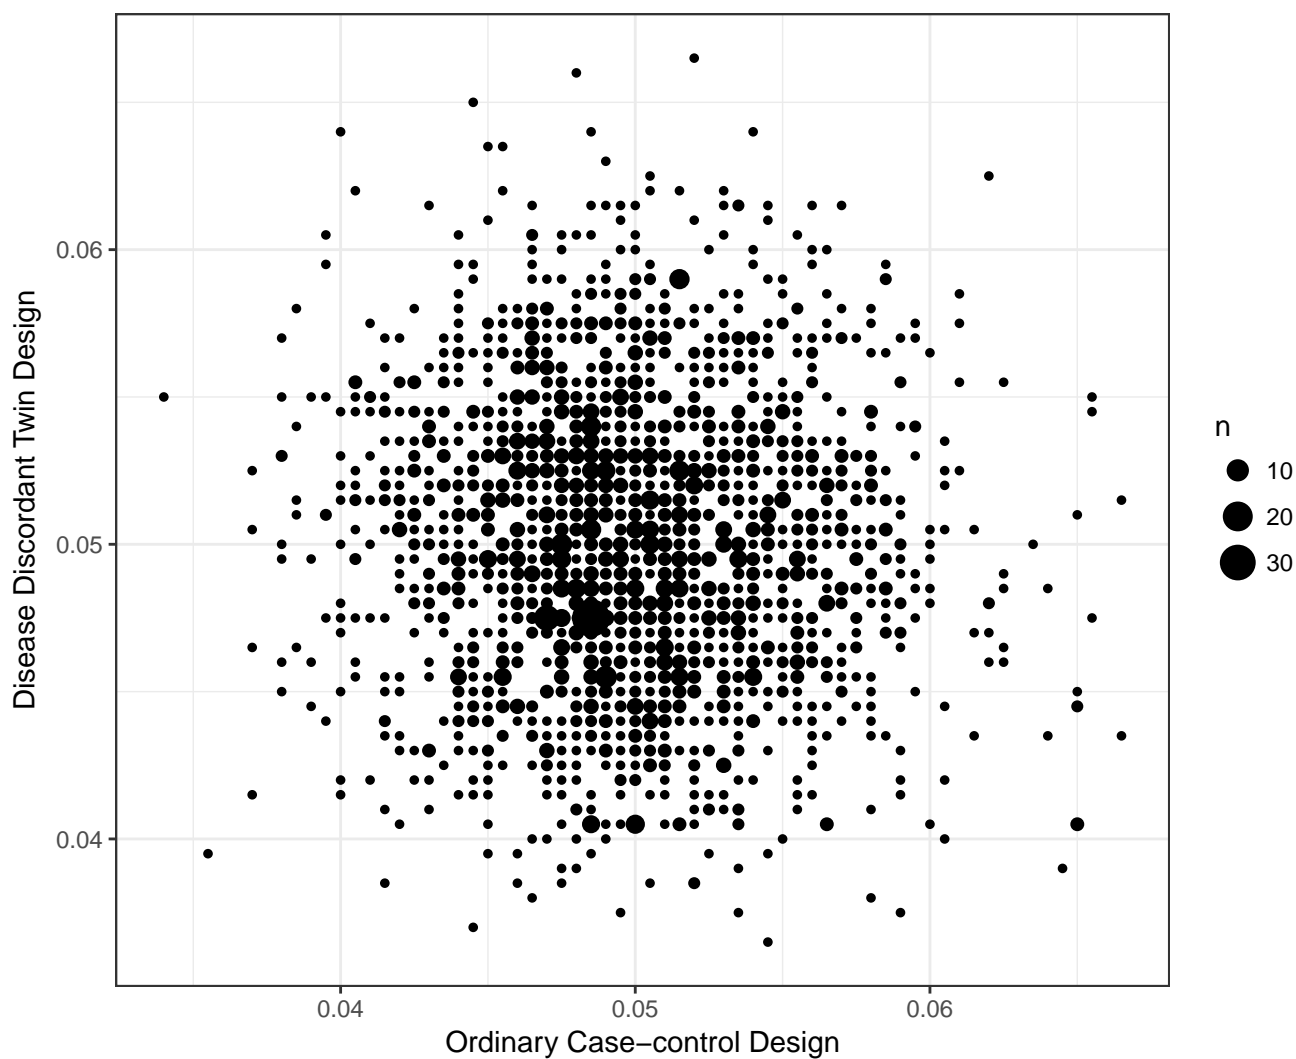

Supplement: bioinformatics_34_23_4073_s1.zip [file bioinformatics_34_23_4073_s1.zip]

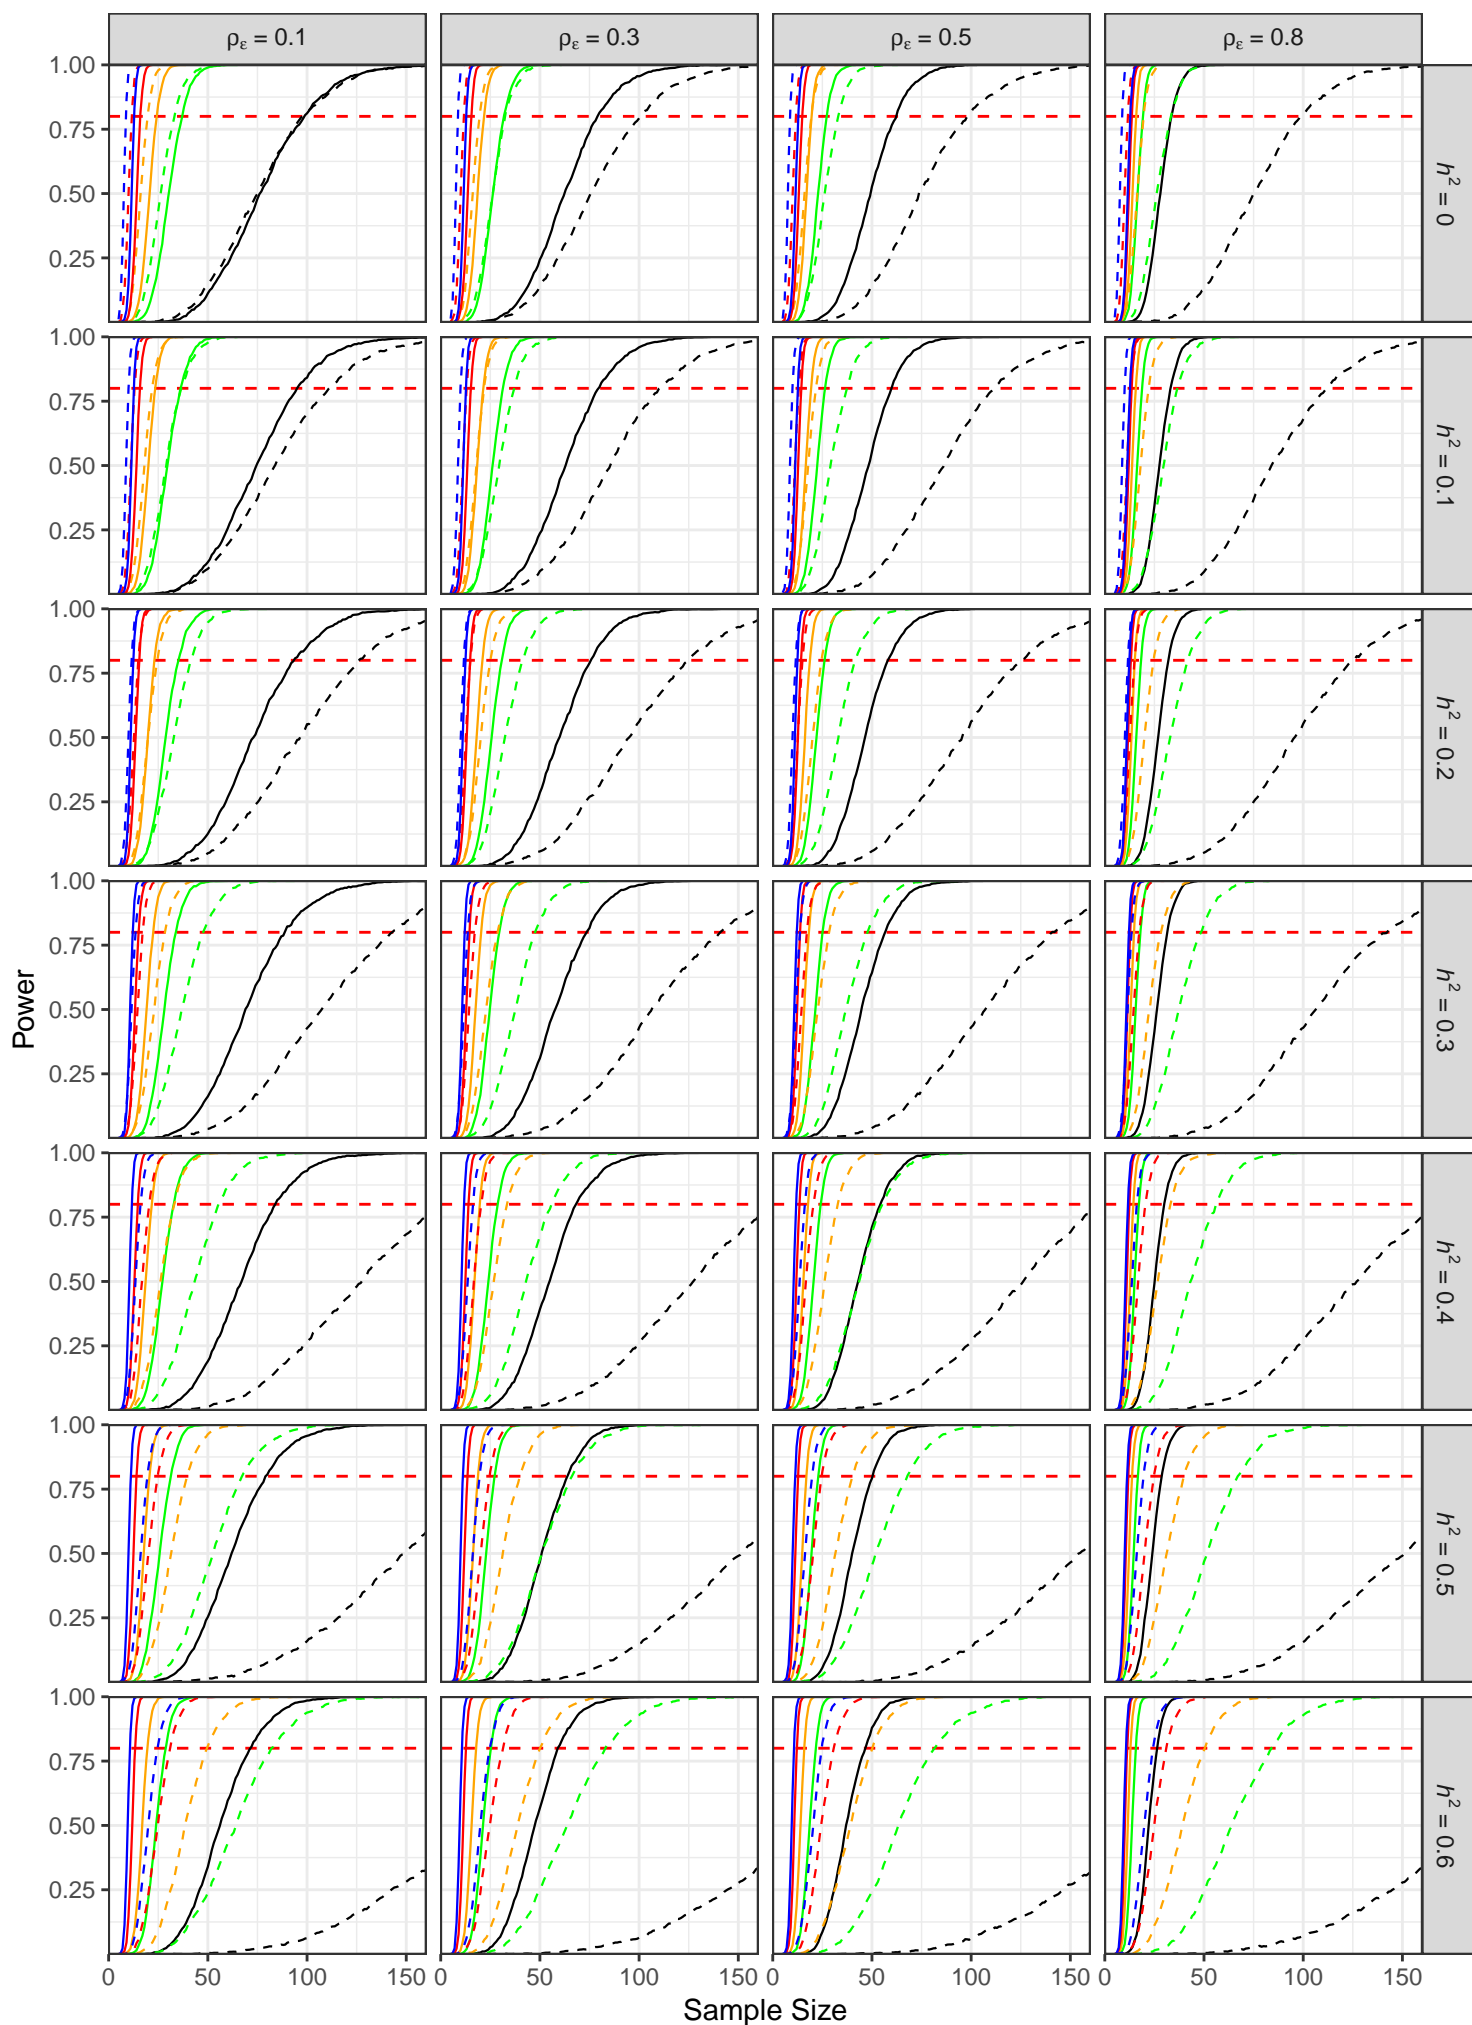

Supplement: bioinformatics_34_23_4073_s1.zip [file bioinformatics_34_23_4073_s1.zip]

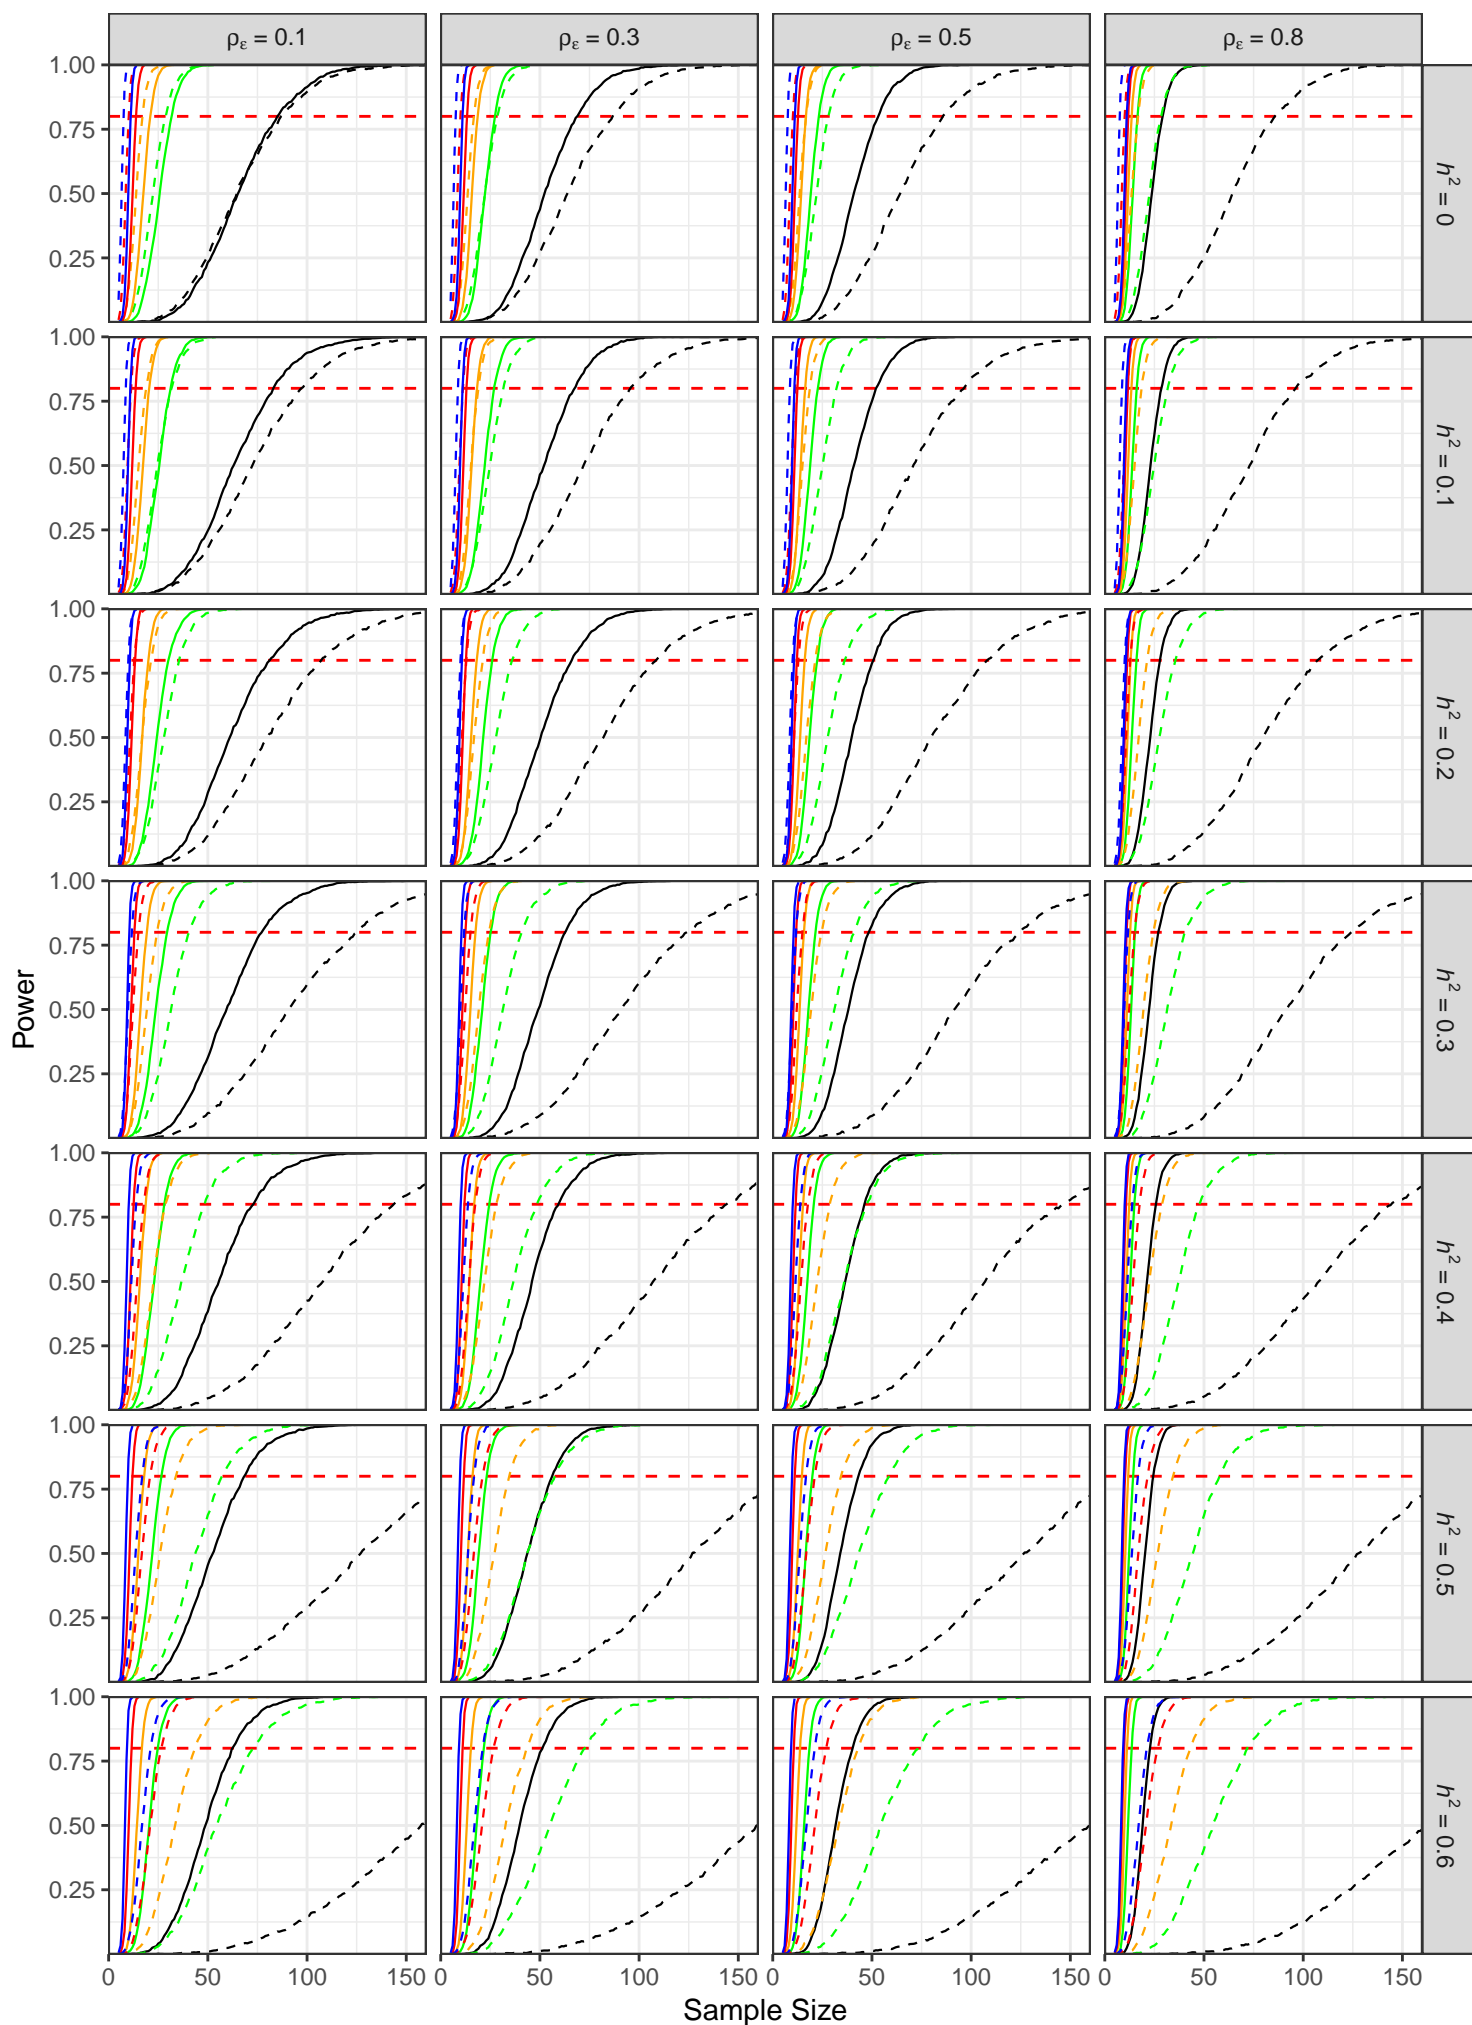

$R^2_{M,E}$  — 0.1 — 0.3 — 0.5 — 0.8 — 1

Design - - Ordinary Case-control — Discordant Twin

Supplement: bioinformatics_34_23_4073_s1.zip [file bioinformatics_34_23_4073_s1.zip]

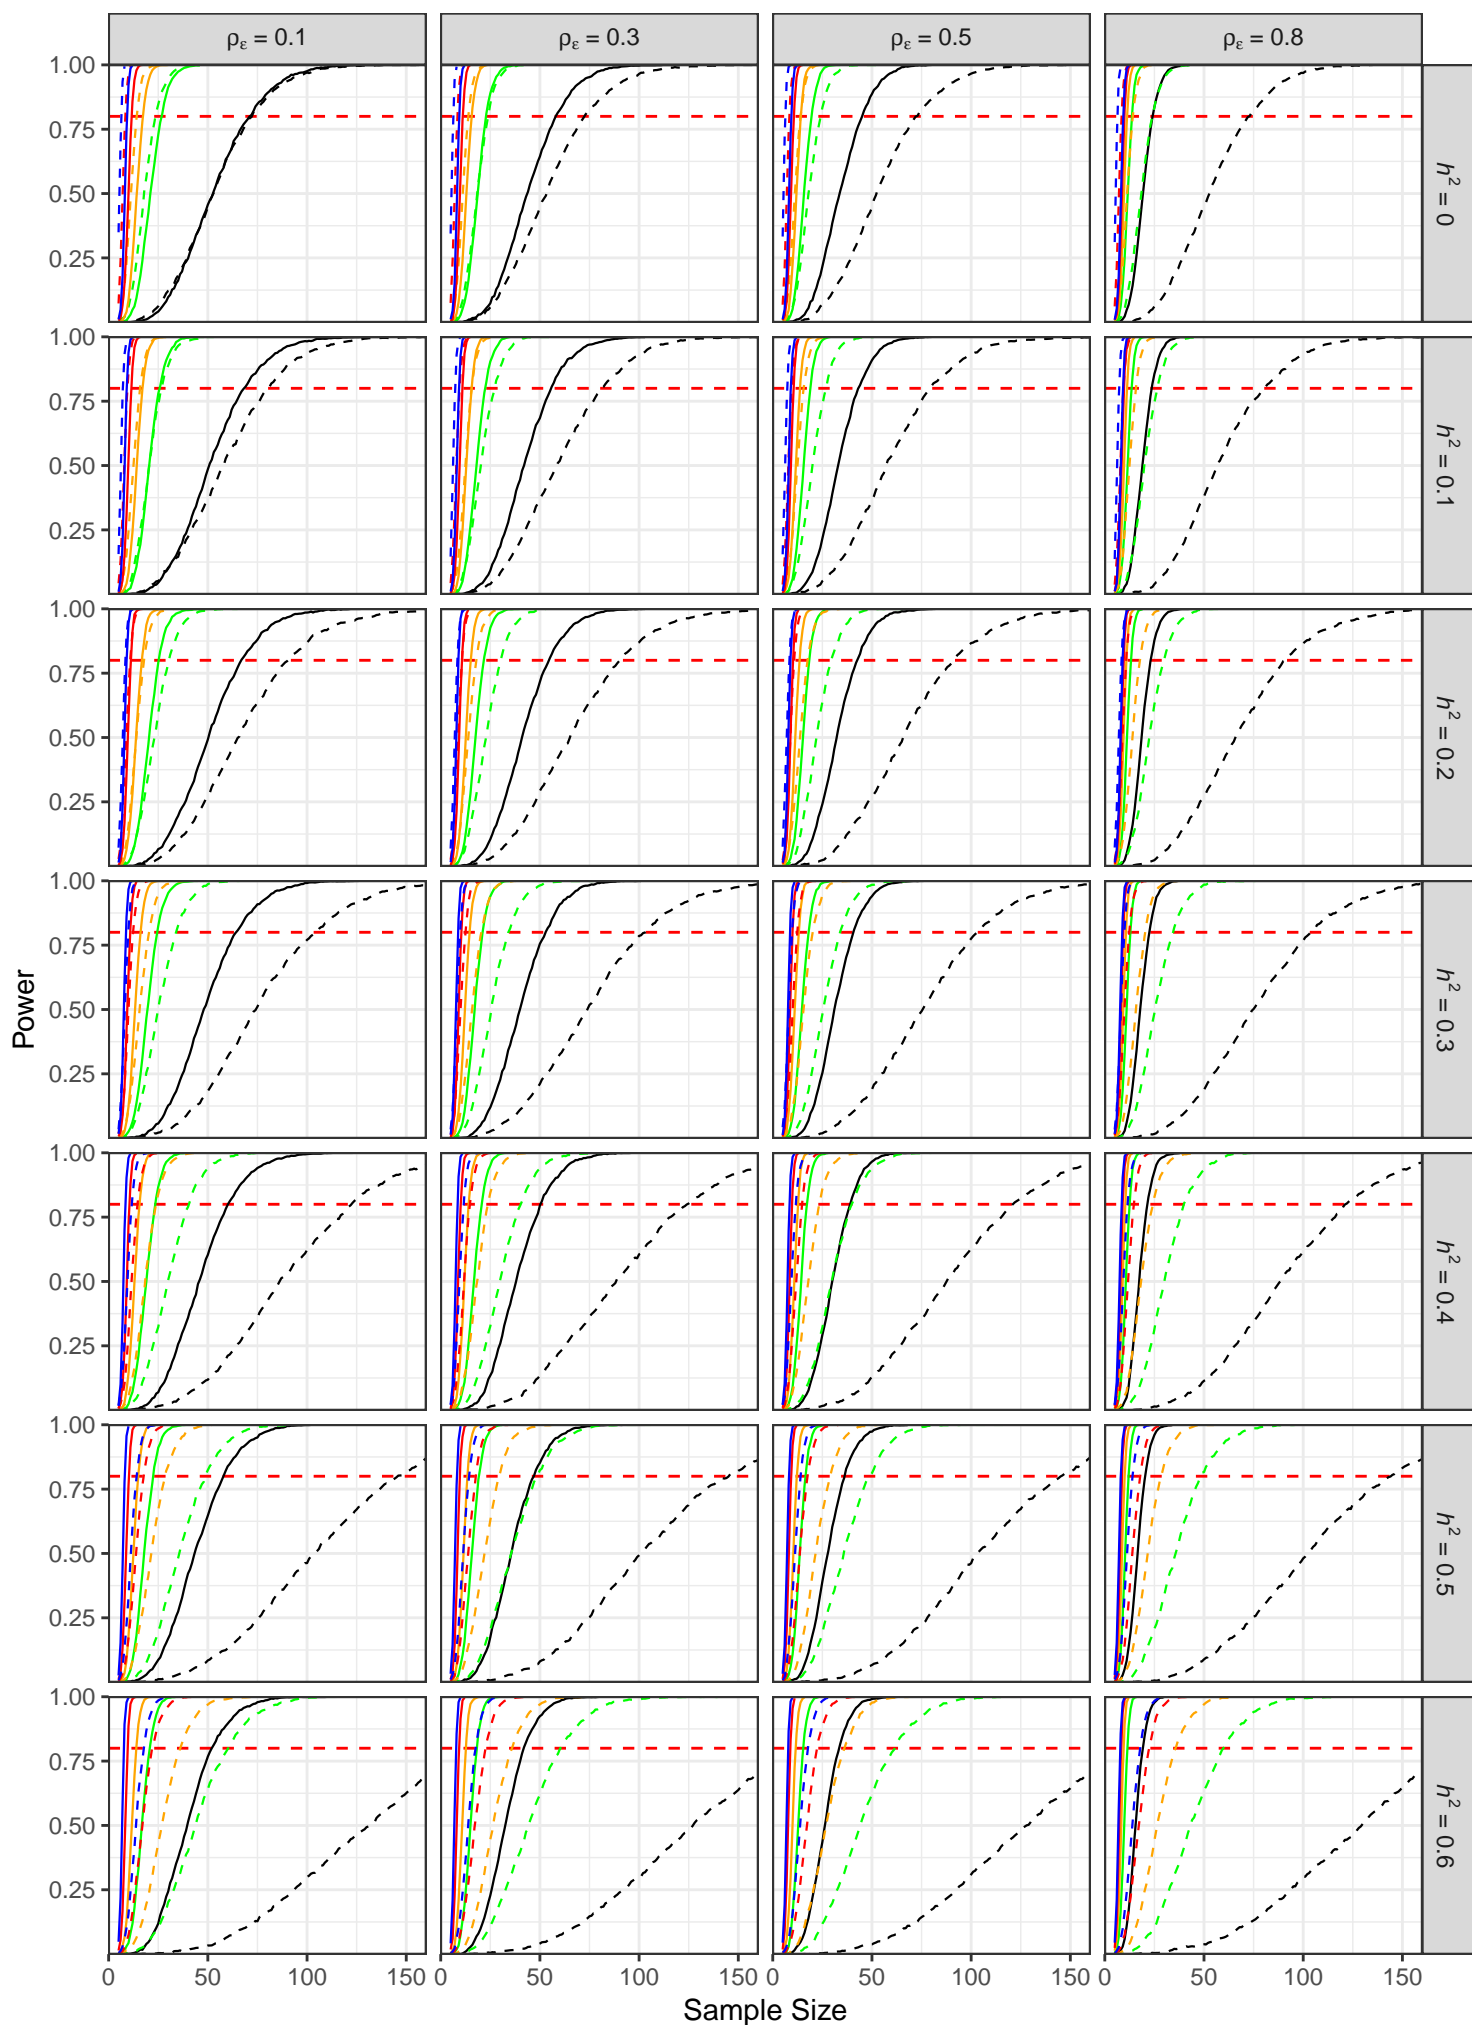

$R^2_{M,E}$  — 0.1 — 0.3 — 0.5 — 0.8 — 1

Design - - Ordinary Case-control — Discordant Twin

Supplement: bioinformatics_34_23_4073_s1.zip [file bioinformatics_34_23_4073_s1.zip]
